# Supplementary material for: Glycoproteomic Characterization of FUT8 Knock-Out CHO Cells Reveals Roles of FUT8 in the Glycosylation
Source: Front Chem. 2021 Oct 29;9:755238. doi: 10.3389/fchem.2021.755238 (PMC8586412; doi:10.3389/fchem.2021.755238)
Supplement: Supplementary file 2 [file Table3.XLSX]

## Sheet: Sheet2
Supplemental data Table S3. The protein glycosylation distribution of the wild-type and FUT8KO CHO cells
Cells	Protein Name	GO CC	Orgin	glycosite No.	Sequence	glycan No.	glycotype	Intact glycopeptides	NGLYCAN
FUT8 KO	zinc transporter ZIP6	Membrane	FUT8 KO	2	NTNDNIQECFNATK	2	Core-fucosylated	NTNDNIQECFNATK-N5H6F2S0G0	N5H6F2S0G0
FUT8 KO	zinc transporter ZIP6	Membrane	FUT8 KO	2	NTNDNIQECFNATK	2	Fucosylated	NTNDNIQECFNATK-N5H6F2S0G0	N5H6F2S0G0
FUT8 KO	angiopoietin-4	Membrane	FUT8 KO	1	YSLLVNASSSSTGLK	2	High-mannosylated	YSLLVNASSSSTGLK-N2H6F0S0G0	N2H6F0S0G0
FUT8 KO	angiopoietin-4	Membrane	FUT8 KO	1	YSLLVNASSSSTGLK	2	High-mannosylated	YSLLVNASSSSTGLK-N2H8F0S0G0	N2H8F0S0G0
FUT8 KO	aspartyl/asparaginyl beta-hydroxylase	Membrane	FUT8 KO	1	VYEEVLNVTPNDGFAK	2	High-mannosylated	VYEEVLNVTPNDGFAK-N2H5F0S0G0	N2H5F0S0G0
FUT8 KO	aspartyl/asparaginyl beta-hydroxylase	Membrane	FUT8 KO	1	VYEEVLNVTPNDGFAK	2	High-mannosylated	VYEEVLNVTPNDGFAK-N2H6F0S0G0	N2H6F0S0G0
FUT8 KO	brother of CDO	Membrane	FUT8 KO	1	ELNGSDNALGVLVTR	2	High-mannosylated	ELNGSDNALGVLVTR-N2H8F0S0G0	N2H8F0S0G0
FUT8 KO	brother of CDO	Membrane	FUT8 KO	1	ELNGSDNALGVLVTR	2	High-mannosylated	ELNGSDNALGVLVTR-N2H9F0S0G0	N2H9F0S0G0
FUT8 KO	cathepsin Z	Membrane	FUT8 KO	1	VCHTIQNYTR	3	High-mannosylated	VCHTIQNYTR-N2H5F0S0G0	N2H5F0S0G0
FUT8 KO	cathepsin Z	Membrane	FUT8 KO	1	VCHTIQNYTR	3	High-mannosylated	VCHTIQNYTR-N2H6F0S0G0	N2H6F0S0G0
FUT8 KO	cathepsin Z	Membrane	FUT8 KO	1	VCHTIQNYTR	3	High-mannosylated	VCHTIQNYTR-N2H7F0S0G0	N2H7F0S0G0
FUT8 KO	collagen alpha-4(IV) chain	Extracellular region	FUT8 KO	1	EASQNITYVCR	4	High-mannosylated	EASQNITYVCR-N2H6F0S0G0	N2H6F0S0G0
FUT8 KO	collagen alpha-4(IV) chain	Extracellular region	FUT8 KO	1	EASQNITYVCR	4	High-mannosylated	EASQNITYVCR-N2H7F0S0G0	N2H7F0S0G0
FUT8 KO	collagen alpha-4(IV) chain	Extracellular region	FUT8 KO	1	EASQNITYVCR	4	High-mannosylated	EASQNITYVCR-N2H8F0S0G0	N2H8F0S0G0
FUT8 KO	collagen alpha-4(IV) chain	Extracellular region	FUT8 KO	1	EASQNITYVCR	4	High-mannosylated	EASQNITYVCR-N2H9F0S0G0	N2H9F0S0G0
FUT8 KO	cyclic AMP-dependent transcription factor ATF-6 alpha	Membrane	FUT8 KO	2	ALMVLTEEPLLYIPPPPCQPLINTTESLR	1	Complex/Hybrid	ALMVLTEEPLLYIPPPPCQPLINTTESLR-N6H5F0S0G0	N6H5F0S0G0
FUT8 KO	cyclic AMP-dependent transcription factor ATF-6 alpha	Membrane	FUT8 KO	2	DHLLLPATTHNK	1	High-mannosylated	DHLLLPATTHNK-N2H10F0S0G0	N2H10F0S0G0
FUT8 KO	cysteine-rich with EGF-like domain protein 2	Endoplasmic reticulum	FUT8 KO	1	NETHSFCTACDESCK	3	High-mannosylated	NETHSFCTACDESCK-N2H3F0S0G0	N2H3F0S0G0
FUT8 KO	cysteine-rich with EGF-like domain protein 2	Endoplasmic reticulum	FUT8 KO	1	NETHSFCTACDESCK	3	High-mannosylated	NETHSFCTACDESCK-N2H5F0S0G0	N2H5F0S0G0
FUT8 KO	cysteine-rich with EGF-like domain protein 2	Endoplasmic reticulum	FUT8 KO	1	NETHSFCTACDESCK	3	High-mannosylated	NETHSFCTACDESCK-N2H6F0S0G0	N2H6F0S0G0
FUT8 KO	ectonucleoside triphosphate diphosphohydrolase 5	Membrane	FUT8 KO	1	DYLTSFEMFNSTFK	2	High-mannosylated	DYLTSFEMFNSTFK-N2H5F0S0G0	N2H5F0S0G0
FUT8 KO	ectonucleoside triphosphate diphosphohydrolase 5	Membrane	FUT8 KO	1	DYLTSFEMFNSTFK	2	High-mannosylated	DYLTSFEMFNSTFK-N2H6F0S0G0	N2H6F0S0G0
FUT8 KO	eukaryotic translation initiation factor 2-alpha kinase 3	Membrane	FUT8 KO	1	WNFSVGHFELR	1	High-mannosylated	WNFSVGHFELR-N2H6F0S0G0	N2H6F0S0G0
FUT8 KO	gamma-glutamyltransferase 7	Golgi apparatus	FUT8 KO	2	GHLVLSPPPPHTGPALISALNILEGFNMTSLVSR	1	High-mannosylated	GHLVLSPPPPHTGPALISALNILEGFNMTSLVSR-N2H6F0S0G0	N2H6F0S0G0
FUT8 KO	gamma-glutamyltransferase 7	Golgi apparatus	FUT8 KO	2	TANHSAPSLENSVQPGK	2	High-mannosylated	TANHSAPSLENSVQPGK-N2H5F0S0G0	N2H5F0S0G0
FUT8 KO	gamma-glutamyltransferase 7	Golgi apparatus	FUT8 KO	2	TANHSAPSLENSVQPGK	2	High-mannosylated	TANHSAPSLENSVQPGK-N2H6F0S0G0	N2H6F0S0G0
FUT8 KO	glucosidase 2 subunit beta	Endoplasmic reticulum	FUT8 KO	2	DGSDEPGTAACPNGSFHCTNTGYK	5	High-mannosylated	DGSDEPGTAACPNGSFHCTNTGYK-N2H9F0S0G0	N2H9F0S0G0
FUT8 KO	glucosidase 2 subunit beta	Endoplasmic reticulum	FUT8 KO	2	YEQGTGCWQGPNR	2	High-mannosylated	YEQGTGCWQGPNR-N2H5F0S0G0	N2H5F0S0G0
FUT8 KO	glucosidase 2 subunit beta	Endoplasmic reticulum	FUT8 KO	2	YEQGTGCWQGPNR	2	High-mannosylated	YEQGTGCWQGPNR-N2H6F0S0G0	N2H6F0S0G0
FUT8 KO	insulin receptor	Membrane	FUT8 KO	1	GETLEIGNYSFYALDNQNLR	5	High-mannosylated	GETLEIGNYSFYALDNQNLR-N2H6F0S0G0	N2H6F0S0G0
FUT8 KO	insulin receptor	Membrane	FUT8 KO	1	GETLEIGNYSFYALDNQNLR	5	High-mannosylated	GETLEIGNYSFYALDNQNLR-N2H7F0S0G0	N2H7F0S0G0
FUT8 KO	insulin receptor	Membrane	FUT8 KO	1	GETLEIGNYSFYALDNQNLR	5	High-mannosylated	GETLEIGNYSFYALDNQNLR-N2H8F0S0G0	N2H8F0S0G0
FUT8 KO	insulin receptor	Membrane	FUT8 KO	1	GETLEIGNYSFYALDNQNLR	5	High-mannosylated	GETLEIGNYSFYALDNQNLR-N2H9F0S0G0	N2H9F0S0G0
FUT8 KO	insulin receptor	Membrane	FUT8 KO	1	GETLEIGNYSFYALDNQNLR	5	Fucosylated	GETLEIGNYSFYALDNQNLR-N8H9F1S0G0	N8H9F1S0G0
FUT8 KO	interleukin-6 receptor subunit beta	Membrane	FUT8 KO	1	GSNFTAICVLK	2	High-mannosylated	GSNFTAICVLK-N2H9F0S0G0	N2H9F0S0G0
FUT8 KO	lactadherin	Membrane	FUT8 KO	1	NNSIPDSHMTASSTYK	7	High-mannosylated	NNSIPDSHMTASSTYK-N2H8F0S0G0	N2H8F0S0G0
FUT8 KO	lactadherin	Membrane	FUT8 KO	1	NNSIPDSHMTASSTYK	7	High-mannosylated	NNSIPDSHMTASSTYK-N2H9F0S0G0	N2H9F0S0G0
FUT8 KO	lactadherin	Membrane	FUT8 KO	1	NNSIPDSHMTASSTYK	7	Sialylated	NNSIPDSHMTASSTYK-N4H5F0S1G0	N4H5F0S1G0
FUT8 KO	lactadherin	Membrane	FUT8 KO	1	NNSIPDSHMTASSTYK	7	Fucosylated	NNSIPDSHMTASSTYK-N4H5F2S0G0	N4H5F2S0G0
FUT8 KO	lactadherin	Membrane	FUT8 KO	1	NNSIPDSHMTASSTYK	7	Complex/Hybrid	NNSIPDSHMTASSTYK-N6H5F0S0G0	N6H5F0S0G0
FUT8 KO	mucolipin-1	Membrane	FUT8 KO	1	GHVDPANDTFDIDPR	1	High-mannosylated	GHVDPANDTFDIDPR-N2H8F0S0G0	N2H8F0S0G0
FUT8 KO	nascent polypeptide-associated complex subunit alpha	Cytoplasm	FUT8 KO	1	VQGEAVSNIQENTQTPTVQEESEEEEVDETGVEVK	2	Fucosylated	VQGEAVSNIQENTQTPTVQEESEEEEVDETGVEVK-N6H7F4S0G0	N6H7F4S0G0
FUT8 KO	nascent polypeptide-associated complex subunit alpha	Cytoplasm	FUT8 KO	1	VQGEAVSNIQENTQTPTVQEESEEEEVDETGVEVK	2	Fucosylated	VQGEAVSNIQENTQTPTVQEESEEEEVDETGVEVK-N7H8F4S0G0	N7H8F4S0G0
FUT8 KO	neurogenic locus notch homolog protein 1	Membrane	FUT8 KO	1	NCTQSLQCWK	2	High-mannosylated	NCTQSLQCWK-N2H8F0S0G0	N2H8F0S0G0
FUT8 KO	neurogenic locus notch homolog protein 1	Membrane	FUT8 KO	1	NCTQSLQCWK	2	High-mannosylated	NCTQSLQCWK-N2H9F0S0G0	N2H9F0S0G0
FUT8 KO	prohibitin	Membrane	FUT8 KO	1	DLQNVNITLR	2	High-mannosylated	DLQNVNITLR-N2H8F0S0G0	N2H8F0S0G0
FUT8 KO	prohibitin	Membrane	FUT8 KO	1	DLQNVNITLR	2	High-mannosylated	DLQNVNITLR-N2H9F0S0G0	N2H9F0S0G0
FUT8 KO	prosalusin	Extracellular region	FUT8 KO	1	SWVQGNLTACGR	4	High-mannosylated	SWVQGNLTACGR-N2H7F0S0G0	N2H7F0S0G0
FUT8 KO	prosalusin	Extracellular region	FUT8 KO	1	SWVQGNLTACGR	4	High-mannosylated	SWVQGNLTACGR-N2H8F0S0G0	N2H8F0S0G0
FUT8 KO	prosalusin	Extracellular region	FUT8 KO	1	SWVQGNLTACGR	4	High-mannosylated	SWVQGNLTACGR-N2H9F0S0G0	N2H9F0S0G0
FUT8 KO	prosalusin	Extracellular region	FUT8 KO	1	SWVQGNLTACGR	4	Fucosylated	SWVQGNLTACGR-N6H7F4S0G0	N6H7F4S0G0
FUT8 KO	protein FAM234B	Membrane	FUT8 KO	1	APDSNCSSLLITTR	2	High-mannosylated	APDSNCSSLLITTR-N2H8F0S0G0	N2H8F0S0G0
FUT8 KO	protein FAM234B	Membrane	FUT8 KO	1	APDSNCSSLLITTR	2	Complex/Hybrid	APDSNCSSLLITTR-N4H5F0S0G0	N4H5F0S0G0
FUT8 KO	ribosome biogenesis protein BMS1 homolog	Nucleus	FUT8 KO	1	LESENEVDETSDIENLLKEDEDHKEENSSSMETSGALK	1	Fucosylated	LESENEVDETSDIENLLKEDEDHKEENSSSMETSGALK-N2H4F1S0G0	N2H4F1S0G0
FUT8 KO	RNA-binding protein FUS	Cytoplasm	FUT8 KO	1	HDSEQDNSDNNTIFVQGLGENVTIESVADYFK	1	Complex/Hybrid	HDSEQDNSDNNTIFVQGLGENVTIESVADYFK-N7H6F0S0G0	N7H6F0S0G0
FUT8 KO	semaphorin-4C	Membrane	FUT8 KO	1	NITVVAGTDLVLPCHLSSNLAR	3	High-mannosylated	NITVVAGTDLVLPCHLSSNLAR-N2H5F0S0G0	N2H5F0S0G0
FUT8 KO	semaphorin-4C	Membrane	FUT8 KO	1	NITVVAGTDLVLPCHLSSNLAR	3	High-mannosylated	NITVVAGTDLVLPCHLSSNLAR-N2H6F0S0G0	N2H6F0S0G0
FUT8 KO	semaphorin-4C	Membrane	FUT8 KO	1	NITVVAGTDLVLPCHLSSNLAR	3	High-mannosylated	NITVVAGTDLVLPCHLSSNLAR-N2H9F0S0G0	N2H9F0S0G0
FUT8 KO	TGF-beta receptor type-1	Membrane	FUT8 KO	1	DNFTCETDGLCFVSVTETTDK	2	High-mannosylated	DNFTCETDGLCFVSVTETTDK-N2H10F0S0G0	N2H10F0S0G0
FUT8 KO	TGF-beta receptor type-1	Membrane	FUT8 KO	1	DNFTCETDGLCFVSVTETTDK	2	High-mannosylated	DNFTCETDGLCFVSVTETTDK-N2H9F0S0G0	N2H9F0S0G0
FUT8 KO	TM2 domain-containing protein 3	Membrane	FUT8 KO	6	LPADCIECATNFSCTYGKPVTFDCTVKPSVTCVDQDLNPQR	3	High-mannosylated	LPADCIECATNFSCTYGKPVTFDCTVKPSVTCVDQDLNPQR-N2H5F0S0G0	N2H5F0S0G0
FUT8 KO	TM2 domain-containing protein 3	Membrane	FUT8 KO	6	LPADCIECATNFSCTYGKPVTFDCTVKPSVTCVDQDLNPQR	3	High-mannosylated	LPADCIECATNFSCTYGKPVTFDCTVKPSVTCVDQDLNPQR-N2H6F0S0G0	N2H6F0S0G0
FUT8 KO	TM2 domain-containing protein 3	Membrane	FUT8 KO	6	LPADCIECATNFSCTYGKPVTFDCTVKPSVTCVDQDLNPQR	3	High-mannosylated	LPADCIECATNFSCTYGKPVTFDCTVKPSVTCVDQDLNPQR-N2H7F0S0G0	N2H7F0S0G0
FUT8 KO	TM2 domain-containing protein 3	Membrane	FUT8 KO	6	NFIINMTCR	2	High-mannosylated	NFIINMTCR-N2H8F0S0G0	N2H8F0S0G0
FUT8 KO	TM2 domain-containing protein 3	Membrane	FUT8 KO	6	NFIINMTCR	2	High-mannosylated	NFIINMTCR-N2H9F0S0G0	N2H9F0S0G0
FUT8 KO	transcription intermediary factor 1-beta	Nucleus	FUT8 KO	1	ASSDSQDANQCCTSCEDNAPATSYCVECSEPLCETCVEAHQR	2	Fucosylated	ASSDSQDANQCCTSCEDNAPATSYCVECSEPLCETCVEAHQR-N10H11F4S0G0	N10H11F4S0G0
FUT8 KO	transmembrane 9 superfamily member 1	Membrane	FUT8 KO	1	IIFANVSVR	2	Sialylated	IIFANVSVR-N4H5F0S1G0	N4H5F0S1G0
FUT8 KO	transmembrane 9 superfamily member 1	Membrane	FUT8 KO	1	IIFANVSVR	2	Fucosylated	IIFANVSVR-N4H5F2S0G0	N4H5F2S0G0
FUT8 KO	transmembrane and TPR repeat-containing protein 4	Membrane	FUT8 KO	1	NLADQGNQTAAIR	2	High-mannosylated	NLADQGNQTAAIR-N2H6F0S0G0	N2H6F0S0G0
FUT8 KO	transmembrane and TPR repeat-containing protein 4	Membrane	FUT8 KO	1	NLADQGNQTAAIR	2	High-mannosylated	NLADQGNQTAAIR-N2H8F0S0G0	N2H8F0S0G0
FUT8 KO	transmembrane channel-like protein 8	Membrane	FUT8 KO	1	AFNNTYLFYGAYR	2	High-mannosylated	AFNNTYLFYGAYR-N2H8F0S0G0	N2H8F0S0G0
FUT8 KO	transmembrane channel-like protein 8	Membrane	FUT8 KO	1	AFNNTYLFYGAYR	2	High-mannosylated	AFNNTYLFYGAYR-N2H9F0S0G0	N2H9F0S0G0
FUT8 KO	transmembrane protein 39A	Membrane	FUT8 KO	1	EQFNNATPIPTHSCPLSPDLIR	2	High-mannosylated	EQFNNATPIPTHSCPLSPDLIR-N2H9F0S0G0	N2H9F0S0G0
FUT8 KO	transmembrane protein 39A	Membrane	FUT8 KO	1	EQFNNATPIPTHSCPLSPDLIR	2	Complex/Hybrid	EQFNNATPIPTHSCPLSPDLIR-N6H5F0S0G0	N6H5F0S0G0
FUT8 KO	transmembrane protein 9	Membrane	FUT8 KO	1	NISGHIYNQNVSQK	3	High-mannosylated	NISGHIYNQNVSQK-N2H6F0S0G0	N2H6F0S0G0
FUT8 KO	transmembrane protein 9	Membrane	FUT8 KO	1	NISGHIYNQNVSQK	3	High-mannosylated	NISGHIYNQNVSQK-N2H8F0S0G0	N2H8F0S0G0
FUT8 KO	transmembrane protein 9	Membrane	FUT8 KO	1	NISGHIYNQNVSQK	3	High-mannosylated	NISGHIYNQNVSQK-N2H9F0S0G0	N2H9F0S0G0
FUT8 KO	UDP-glucose:glycoprotein glucosyltransferase 2	Endoplasmic reticulum	FUT8 KO	1	DNLTIFQK	2	High-mannosylated	DNLTIFQK-N2H5F0S0G0	N2H5F0S0G0
FUT8 KO	UDP-glucose:glycoprotein glucosyltransferase 2	Endoplasmic reticulum	FUT8 KO	1	DNLTIFQK	2	High-mannosylated	DNLTIFQK-N2H6F0S0G0	N2H6F0S0G0
FUT8 KO	voltage-dependent anion-selective channel protein 2	Membrane	FUT8 KO	1	SCSGVEFSTSGSSNTDTGK	1	Fucosylated	SCSGVEFSTSGSSNTDTGK-N7H8F1S0G0	N7H8F1S0G0
FUT8 KO	volume-regulated anion channel subunit LRRC8A	Membrane	FUT8 KO	1	GWVASSPEPTYPNSTVLPNPDTGPTGIK	3	High-mannosylated	GWVASSPEPTYPNSTVLPNPDTGPTGIK-N2H8F0S0G0	N2H8F0S0G0
FUT8 KO	volume-regulated anion channel subunit LRRC8A	Membrane	FUT8 KO	1	GWVASSPEPTYPNSTVLPNPDTGPTGIK	3	High-mannosylated	GWVASSPEPTYPNSTVLPNPDTGPTGIK-N2H9F0S0G0	N2H9F0S0G0
FUT8 KO	volume-regulated anion channel subunit LRRC8A	Membrane	FUT8 KO	1	GWVASSPEPTYPNSTVLPNPDTGPTGIK	3	Complex/Hybrid	GWVASSPEPTYPNSTVLPNPDTGPTGIK-N6H5F0S0G0	N6H5F0S0G0
FUT8 KO	zinc transporter ZIP6	Membrane	FUT8 KO	2	NTNDNIQECFNATK	2	Complex/Hybrid	NTNDNIQECFNATK-N4H5F0S0G0	N4H5F0S0G0
FUT8 KO	zinc transporter ZIP6	Membrane	FUT8 KO	2	YGENDSLSVEGFR	4	High-mannosylated	YGENDSLSVEGFR-N2H8F0S0G0	N2H8F0S0G0
FUT8 KO	zinc transporter ZIP6	Membrane	FUT8 KO	2	YGENDSLSVEGFR	4	Fucosylated	YGENDSLSVEGFR-N4H5F2S0G0	N4H5F2S0G0
FUT8 KO	zinc transporter ZIP6	Membrane	FUT8 KO	2	YGENDSLSVEGFR	4	Fucosylated	YGENDSLSVEGFR-N5H6F4S0G0	N5H6F4S0G0
FUT8 KO	4F2 cell-surface antigen heavy chain	Membrane	WT+FUT8 KO	3	LEAANLPAGISLPASANLLFSTNSTR	15	Core-fucosylated	LEAANLPAGISLPASANLLFSTNSTR-N5H6F2S0G0	N5H6F2S0G0
FUT8 KO	4F2 cell-surface antigen heavy chain	Membrane	WT+FUT8 KO	3	LEAANLPAGISLPASANLLFSTNSTR	15	Fucosylated	LEAANLPAGISLPASANLLFSTNSTR-N5H6F2S0G0	N5H6F2S0G0
FUT8 KO	alpha-mannosidase 2	Cytoplasm	WT+FUT8 KO	3	FAVESLTPSSLSLMHSPPDAQNLSEVTLSPMEISTFR	4	Core-fucosylated	FAVESLTPSSLSLMHSPPDAQNLSEVTLSPMEISTFR-N7H8F2S0G0	N7H8F2S0G0
FUT8 KO	alpha-mannosidase 2	Cytoplasm	WT+FUT8 KO	3	FAVESLTPSSLSLMHSPPDAQNLSEVTLSPMEISTFR	4	Fucosylated	FAVESLTPSSLSLMHSPPDAQNLSEVTLSPMEISTFR-N7H8F2S0G0	N7H8F2S0G0
FUT8 KO	ATP-binding cassette sub-family A member 1	Membrane	WT+FUT8 KO	4	EAFNETNQAIQTISR	10	Core-fucosylated	EAFNETNQAIQTISR-N4H5F3S0G0	N4H5F3S0G0
FUT8 KO	ATP-binding cassette sub-family A member 1	Membrane	WT+FUT8 KO	4	EAFNETNQAIQTISR	10	Fucosylated	EAFNETNQAIQTISR-N4H5F3S0G0	N4H5F3S0G0
FUT8 KO	basement membrane-specific heparan sulfate proteoglycan core protein	Membrane	WT+FUT8 KO	5	NQELEDNVHISPNGSIITIVGTRPSNHGAYR	14	Core-fucosylated	NQELEDNVHISPNGSIITIVGTRPSNHGAYR-N4H5F3S0G0	N4H5F3S0G0
FUT8 KO	basement membrane-specific heparan sulfate proteoglycan core protein	Membrane	WT+FUT8 KO	5	NQELEDNVHISPNGSIITIVGTRPSNHGAYR	14	Fucosylated	NQELEDNVHISPNGSIITIVGTRPSNHGAYR-N4H5F3S0G0	N4H5F3S0G0
FUT8 KO	basigin	Membrane	WT+FUT8 KO	3	THLTCSLNSSGVDIIGHR	77	Core-fucosylated	THLTCSLNSSGVDIIGHR-N10H11F4S0G0	N10H11F4S0G0
FUT8 KO	basigin	Membrane	WT+FUT8 KO	3	THLTCSLNSSGVDIIGHR	77	Fucosylated	THLTCSLNSSGVDIIGHR-N10H11F4S0G0	N10H11F4S0G0
FUT8 KO	basigin	Membrane	WT+FUT8 KO	3	THLTCSLNSSGVDIIGHR	77	Core-fucosylated	THLTCSLNSSGVDIIGHR-N6H7F3S0G0	N6H7F3S0G0
FUT8 KO	basigin	Membrane	WT+FUT8 KO	3	THLTCSLNSSGVDIIGHR	77	Fucosylated	THLTCSLNSSGVDIIGHR-N6H7F3S0G0	N6H7F3S0G0
FUT8 KO	basigin	Membrane	WT+FUT8 KO	3	THLTCSLNSSGVDIIGHR	77	Core-fucosylated	THLTCSLNSSGVDIIGHR-N7H8F5S0G0	N7H8F5S0G0
FUT8 KO	basigin	Membrane	WT+FUT8 KO	3	THLTCSLNSSGVDIIGHR	77	Fucosylated	THLTCSLNSSGVDIIGHR-N7H8F5S0G0	N7H8F5S0G0
FUT8 KO	basigin	Membrane	WT+FUT8 KO	3	THLTCSLNSSGVDIIGHR	77	Core-fucosylated	THLTCSLNSSGVDIIGHR-N8H9F2S0G0	N8H9F2S0G0
FUT8 KO	basigin	Membrane	WT+FUT8 KO	3	THLTCSLNSSGVDIIGHR	77	Fucosylated	THLTCSLNSSGVDIIGHR-N8H9F2S0G0	N8H9F2S0G0
FUT8 KO	basigin	Membrane	WT+FUT8 KO	3	THLTCSLNSSGVDIIGHR	77	Core-fucosylated	THLTCSLNSSGVDIIGHR-N8H9F7S0G0	N8H9F7S0G0
FUT8 KO	basigin	Membrane	WT+FUT8 KO	3	THLTCSLNSSGVDIIGHR	77	Fucosylated	THLTCSLNSSGVDIIGHR-N8H9F7S0G0	N8H9F7S0G0
FUT8 KO	basigin	Membrane	WT+FUT8 KO	3	THLTCSLNSSGVDIIGHR	77	Core-fucosylated	THLTCSLNSSGVDIIGHR-N9H10F2S0G0	N9H10F2S0G0
FUT8 KO	basigin	Membrane	WT+FUT8 KO	3	THLTCSLNSSGVDIIGHR	77	Fucosylated	THLTCSLNSSGVDIIGHR-N9H10F2S0G0	N9H10F2S0G0
FUT8 KO	basigin	Membrane	WT+FUT8 KO	3	THLTCSLNSSGVDIIGHR	77	Core-fucosylated	THLTCSLNSSGVDIIGHR-N9H10F7S0G0	N9H10F7S0G0
FUT8 KO	basigin	Membrane	WT+FUT8 KO	3	THLTCSLNSSGVDIIGHR	77	Fucosylated	THLTCSLNSSGVDIIGHR-N9H10F7S0G0	N9H10F7S0G0
FUT8 KO	basigin	Membrane	WT+FUT8 KO	3	TSDSGDQLITNSSESK	9	Core-fucosylated	TSDSGDQLITNSSESK-N6H7F3S0G0	N6H7F3S0G0
FUT8 KO	basigin	Membrane	WT+FUT8 KO	3	TSDSGDQLITNSSESK	9	Fucosylated	TSDSGDQLITNSSESK-N6H7F3S0G0	N6H7F3S0G0
FUT8 KO	basigin	Membrane	WT+FUT8 KO	3	TSDSGDQLITNSSESK	9	Core-fucosylated	TSDSGDQLITNSSESK-N7H8F5S0G0	N7H8F5S0G0
FUT8 KO	basigin	Membrane	WT+FUT8 KO	3	TSDSGDQLITNSSESK	9	Fucosylated	TSDSGDQLITNSSESK-N7H8F5S0G0	N7H8F5S0G0
FUT8 KO	basigin	Membrane	WT+FUT8 KO	3	TSDSGDQLITNSSESK	9	Core-fucosylated	TSDSGDQLITNSSESK-N8H9F3S0G0	N8H9F3S0G0
FUT8 KO	basigin	Membrane	WT+FUT8 KO	3	TSDSGDQLITNSSESK	9	Fucosylated	TSDSGDQLITNSSESK-N8H9F3S0G0	N8H9F3S0G0
FUT8 KO	basigin	Membrane	WT+FUT8 KO	3	TSDSGDQLITNSSESK	9	Core-fucosylated	TSDSGDQLITNSSESK-N9H10F2S0G0	N9H10F2S0G0
FUT8 KO	basigin	Membrane	WT+FUT8 KO	3	TSDSGDQLITNSSESK	9	Fucosylated	TSDSGDQLITNSSESK-N9H10F2S0G0	N9H10F2S0G0
FUT8 KO	bone marrow stromal antigen 2	Membrane	WT+FUT8 KO	1	SQDNLAQAEAQASTCNR	26	Core-fucosylated	SQDNLAQAEAQASTCNR-N4H5F1S0G0	N4H5F1S0G0
FUT8 KO	bone marrow stromal antigen 2	Membrane	WT+FUT8 KO	1	SQDNLAQAEAQASTCNR	26	Fucosylated	SQDNLAQAEAQASTCNR-N4H5F1S0G0	N4H5F1S0G0
FUT8 KO	bone marrow stromal antigen 2	Membrane	WT+FUT8 KO	1	SQDNLAQAEAQASTCNR	26	Core-fucosylated	SQDNLAQAEAQASTCNR-N4H5F3S0G0	N4H5F3S0G0
FUT8 KO	bone marrow stromal antigen 2	Membrane	WT+FUT8 KO	1	SQDNLAQAEAQASTCNR	26	Fucosylated	SQDNLAQAEAQASTCNR-N4H5F3S0G0	N4H5F3S0G0
FUT8 KO	bone marrow stromal antigen 2	Membrane	WT+FUT8 KO	1	SQDNLAQAEAQASTCNR	26	Core-fucosylated	SQDNLAQAEAQASTCNR-N5H6F3S0G0	N5H6F3S0G0
FUT8 KO	bone marrow stromal antigen 2	Membrane	WT+FUT8 KO	1	SQDNLAQAEAQASTCNR	26	Fucosylated	SQDNLAQAEAQASTCNR-N5H6F3S0G0	N5H6F3S0G0
FUT8 KO	bone marrow stromal antigen 2	Membrane	WT+FUT8 KO	1	SQDNLAQAEAQASTCNR	26	Core-fucosylated	SQDNLAQAEAQASTCNR-N6H7F3S0G0	N6H7F3S0G0
FUT8 KO	bone marrow stromal antigen 2	Membrane	WT+FUT8 KO	1	SQDNLAQAEAQASTCNR	26	Fucosylated	SQDNLAQAEAQASTCNR-N6H7F3S0G0	N6H7F3S0G0
FUT8 KO	bone marrow stromal antigen 2	Membrane	WT+FUT8 KO	1	SQDNLAQAEAQASTCNR	26	Core-fucosylated	SQDNLAQAEAQASTCNR-N7H8F5S0G0	N7H8F5S0G0
FUT8 KO	bone marrow stromal antigen 2	Membrane	WT+FUT8 KO	1	SQDNLAQAEAQASTCNR	26	Fucosylated	SQDNLAQAEAQASTCNR-N7H8F5S0G0	N7H8F5S0G0
FUT8 KO	cathepsin D	Lysosome	WT+FUT8 KO	2	YYEGELSYLNVTR	13	Core-fucosylated	YYEGELSYLNVTR-N2H3F1S0G0	N2H3F1S0G0
FUT8 KO	cathepsin D	Lysosome	WT+FUT8 KO	2	YYEGELSYLNVTR	13	Fucosylated	YYEGELSYLNVTR-N2H3F1S0G0	N2H3F1S0G0
FUT8 KO	cathepsin D	Lysosome	WT+FUT8 KO	2	YYEGELSYLNVTR	13	Core-fucosylated	YYEGELSYLNVTR-N2H4F1S0G0	N2H4F1S0G0
FUT8 KO	cathepsin D	Lysosome	WT+FUT8 KO	2	YYEGELSYLNVTR	13	Fucosylated	YYEGELSYLNVTR-N2H4F1S0G0	N2H4F1S0G0
FUT8 KO	cathepsin D	Lysosome	WT+FUT8 KO	2	YYEGELSYLNVTR	13	Core-fucosylated	YYEGELSYLNVTR-N2H5F1S0G0	N2H5F1S0G0
FUT8 KO	cathepsin D	Lysosome	WT+FUT8 KO	2	YYEGELSYLNVTR	13	Fucosylated	YYEGELSYLNVTR-N2H5F1S0G0	N2H5F1S0G0
FUT8 KO	cathepsin D	Lysosome	WT+FUT8 KO	2	YYEGELSYLNVTR	13	Core-fucosylated	YYEGELSYLNVTR-N4H3F1S0G0	N4H3F1S0G0
FUT8 KO	cathepsin D	Lysosome	WT+FUT8 KO	2	YYEGELSYLNVTR	13	Fucosylated	YYEGELSYLNVTR-N4H3F1S0G0	N4H3F1S0G0
FUT8 KO	cathepsin D	Lysosome	WT+FUT8 KO	2	YYEGELSYLNVTR	13	Core-fucosylated	YYEGELSYLNVTR-N4H5F1S0G0	N4H5F1S0G0
FUT8 KO	cathepsin D	Lysosome	WT+FUT8 KO	2	YYEGELSYLNVTR	13	Fucosylated	YYEGELSYLNVTR-N4H5F1S0G0	N4H5F1S0G0
FUT8 KO	cation-dependent mannose-6-phosphate receptor	Membrane	WT+FUT8 KO	1	EAGNHSSGAGLVQISK	31	Core-fucosylated	EAGNHSSGAGLVQISK-N4H5F3S0G0	N4H5F3S0G0
FUT8 KO	cation-dependent mannose-6-phosphate receptor	Membrane	WT+FUT8 KO	1	EAGNHSSGAGLVQISK	31	Fucosylated	EAGNHSSGAGLVQISK-N4H5F3S0G0	N4H5F3S0G0
FUT8 KO	cation-dependent mannose-6-phosphate receptor	Membrane	WT+FUT8 KO	1	EAGNHSSGAGLVQISK	31	Core-fucosylated	EAGNHSSGAGLVQISK-N5H6F3S0G0	N5H6F3S0G0
FUT8 KO	cation-dependent mannose-6-phosphate receptor	Membrane	WT+FUT8 KO	1	EAGNHSSGAGLVQISK	31	Fucosylated	EAGNHSSGAGLVQISK-N5H6F3S0G0	N5H6F3S0G0
FUT8 KO	cation-dependent mannose-6-phosphate receptor	Membrane	WT+FUT8 KO	1	EAGNHSSGAGLVQISK	31	Core-fucosylated	EAGNHSSGAGLVQISK-N6H7F3S0G0	N6H7F3S0G0
FUT8 KO	cation-dependent mannose-6-phosphate receptor	Membrane	WT+FUT8 KO	1	EAGNHSSGAGLVQISK	31	Fucosylated	EAGNHSSGAGLVQISK-N6H7F3S0G0	N6H7F3S0G0
FUT8 KO	cation-dependent mannose-6-phosphate receptor	Membrane	WT+FUT8 KO	1	EAGNHSSGAGLVQISK	31	Core-fucosylated	EAGNHSSGAGLVQISK-N7H8F3S0G0	N7H8F3S0G0
FUT8 KO	cation-dependent mannose-6-phosphate receptor	Membrane	WT+FUT8 KO	1	EAGNHSSGAGLVQISK	31	Fucosylated	EAGNHSSGAGLVQISK-N7H8F3S0G0	N7H8F3S0G0
FUT8 KO	cation-dependent mannose-6-phosphate receptor	Membrane	WT+FUT8 KO	1	EAGNHSSGAGLVQISK	31	Core-fucosylated	EAGNHSSGAGLVQISK-N7H8F5S0G0	N7H8F5S0G0
FUT8 KO	cation-dependent mannose-6-phosphate receptor	Membrane	WT+FUT8 KO	1	EAGNHSSGAGLVQISK	31	Fucosylated	EAGNHSSGAGLVQISK-N7H8F5S0G0	N7H8F5S0G0
FUT8 KO	cation-independent mannose-6-phosphate receptor	Membrane	WT+FUT8 KO	17	AACAVRPQEVSMVNGTLTNPVTGR	17	Core-fucosylated	AACAVRPQEVSMVNGTLTNPVTGR-N4H5F1S0G0	N4H5F1S0G0
FUT8 KO	cation-independent mannose-6-phosphate receptor	Membrane	WT+FUT8 KO	17	AACAVRPQEVSMVNGTLTNPVTGR	17	Fucosylated	AACAVRPQEVSMVNGTLTNPVTGR-N4H5F1S0G0	N4H5F1S0G0
FUT8 KO	cation-independent mannose-6-phosphate receptor	Membrane	WT+FUT8 KO	17	AACAVRPQEVSMVNGTLTNPVTGR	17	Core-fucosylated	AACAVRPQEVSMVNGTLTNPVTGR-N4H5F3S0G0	N4H5F3S0G0
FUT8 KO	cation-independent mannose-6-phosphate receptor	Membrane	WT+FUT8 KO	17	AACAVRPQEVSMVNGTLTNPVTGR	17	Fucosylated	AACAVRPQEVSMVNGTLTNPVTGR-N4H5F3S0G0	N4H5F3S0G0
FUT8 KO	cation-independent mannose-6-phosphate receptor	Membrane	WT+FUT8 KO	17	AACAVRPQEVSMVNGTLTNPVTGR	17	Core-fucosylated	AACAVRPQEVSMVNGTLTNPVTGR-N5H6F1S0G0	N5H6F1S0G0
FUT8 KO	cation-independent mannose-6-phosphate receptor	Membrane	WT+FUT8 KO	17	AACAVRPQEVSMVNGTLTNPVTGR	17	Fucosylated	AACAVRPQEVSMVNGTLTNPVTGR-N5H6F1S0G0	N5H6F1S0G0
FUT8 KO	cation-independent mannose-6-phosphate receptor	Membrane	WT+FUT8 KO	17	AACAVRPQEVSMVNGTLTNPVTGR	17	Core-fucosylated	AACAVRPQEVSMVNGTLTNPVTGR-N5H6F3S0G0	N5H6F3S0G0
FUT8 KO	cation-independent mannose-6-phosphate receptor	Membrane	WT+FUT8 KO	17	AACAVRPQEVSMVNGTLTNPVTGR	17	Fucosylated	AACAVRPQEVSMVNGTLTNPVTGR-N5H6F3S0G0	N5H6F3S0G0
FUT8 KO	cation-independent mannose-6-phosphate receptor	Membrane	WT+FUT8 KO	17	DAGVGFPEYQEEDNSTYNFR	22	Core-fucosylated	DAGVGFPEYQEEDNSTYNFR-N2H3F1S0G0	N2H3F1S0G0
FUT8 KO	cation-independent mannose-6-phosphate receptor	Membrane	WT+FUT8 KO	17	DAGVGFPEYQEEDNSTYNFR	22	Fucosylated	DAGVGFPEYQEEDNSTYNFR-N2H3F1S0G0	N2H3F1S0G0
FUT8 KO	cation-independent mannose-6-phosphate receptor	Membrane	WT+FUT8 KO	17	DAGVGFPEYQEEDNSTYNFR	22	Core-fucosylated	DAGVGFPEYQEEDNSTYNFR-N4H5F1S0G0	N4H5F1S0G0
FUT8 KO	cation-independent mannose-6-phosphate receptor	Membrane	WT+FUT8 KO	17	DAGVGFPEYQEEDNSTYNFR	22	Fucosylated	DAGVGFPEYQEEDNSTYNFR-N4H5F1S0G0	N4H5F1S0G0
FUT8 KO	cation-independent mannose-6-phosphate receptor	Membrane	WT+FUT8 KO	17	DAGVGFPEYQEEDNSTYNFR	22	Core-fucosylated	DAGVGFPEYQEEDNSTYNFR-N4H5F2S0G0	N4H5F2S0G0
FUT8 KO	cation-independent mannose-6-phosphate receptor	Membrane	WT+FUT8 KO	17	DAGVGFPEYQEEDNSTYNFR	22	Fucosylated	DAGVGFPEYQEEDNSTYNFR-N4H5F2S0G0	N4H5F2S0G0
FUT8 KO	cation-independent mannose-6-phosphate receptor	Membrane	WT+FUT8 KO	17	DAGVGFPEYQEEDNSTYNFR	22	Core-fucosylated	DAGVGFPEYQEEDNSTYNFR-N4H5F3S0G0	N4H5F3S0G0
FUT8 KO	cation-independent mannose-6-phosphate receptor	Membrane	WT+FUT8 KO	17	DAGVGFPEYQEEDNSTYNFR	22	Fucosylated	DAGVGFPEYQEEDNSTYNFR-N4H5F3S0G0	N4H5F3S0G0
FUT8 KO	cation-independent mannose-6-phosphate receptor	Membrane	WT+FUT8 KO	17	DAGVGFPEYQEEDNSTYNFR	22	Core-fucosylated	DAGVGFPEYQEEDNSTYNFR-N7H8F1S0G0	N7H8F1S0G0
FUT8 KO	cation-independent mannose-6-phosphate receptor	Membrane	WT+FUT8 KO	17	DAGVGFPEYQEEDNSTYNFR	22	Fucosylated	DAGVGFPEYQEEDNSTYNFR-N7H8F1S0G0	N7H8F1S0G0
FUT8 KO	cation-independent mannose-6-phosphate receptor	Membrane	WT+FUT8 KO	17	NGSSIIDLSPLIHR	30	Core-fucosylated	NGSSIIDLSPLIHR-N4H5F1S0G0	N4H5F1S0G0
FUT8 KO	cation-independent mannose-6-phosphate receptor	Membrane	WT+FUT8 KO	17	NGSSIIDLSPLIHR	30	Fucosylated	NGSSIIDLSPLIHR-N4H5F1S0G0	N4H5F1S0G0
FUT8 KO	cation-independent mannose-6-phosphate receptor	Membrane	WT+FUT8 KO	17	NGSSIIDLSPLIHR	30	Core-fucosylated	NGSSIIDLSPLIHR-N4H5F3S0G0	N4H5F3S0G0
FUT8 KO	cation-independent mannose-6-phosphate receptor	Membrane	WT+FUT8 KO	17	NGSSIIDLSPLIHR	30	Fucosylated	NGSSIIDLSPLIHR-N4H5F3S0G0	N4H5F3S0G0
FUT8 KO	cation-independent mannose-6-phosphate receptor	Membrane	WT+FUT8 KO	17	NGSSIIDLSPLIHR	30	Core-fucosylated	NGSSIIDLSPLIHR-N5H6F3S0G0	N5H6F3S0G0
FUT8 KO	cation-independent mannose-6-phosphate receptor	Membrane	WT+FUT8 KO	17	NGSSIIDLSPLIHR	30	Fucosylated	NGSSIIDLSPLIHR-N5H6F3S0G0	N5H6F3S0G0
FUT8 KO	cation-independent mannose-6-phosphate receptor	Membrane	WT+FUT8 KO	17	TGPVVEESGSLLLEYVNGSACTTSDGR	27	Core-fucosylated	TGPVVEESGSLLLEYVNGSACTTSDGR-N4H5F3S0G0	N4H5F3S0G0
FUT8 KO	cation-independent mannose-6-phosphate receptor	Membrane	WT+FUT8 KO	17	TGPVVEESGSLLLEYVNGSACTTSDGR	27	Fucosylated	TGPVVEESGSLLLEYVNGSACTTSDGR-N4H5F3S0G0	N4H5F3S0G0
FUT8 KO	CD166 antigen	Membrane	WT+FUT8 KO	8	DSYPDGNITWYR	13	Core-fucosylated	DSYPDGNITWYR-N4H5F1S0G0	N4H5F1S0G0
FUT8 KO	CD166 antigen	Membrane	WT+FUT8 KO	8	DSYPDGNITWYR	13	Fucosylated	DSYPDGNITWYR-N4H5F1S0G0	N4H5F1S0G0
FUT8 KO	CD166 antigen	Membrane	WT+FUT8 KO	8	DSYPDGNITWYR	13	Core-fucosylated	DSYPDGNITWYR-N4H5F3S0G0	N4H5F3S0G0
FUT8 KO	CD166 antigen	Membrane	WT+FUT8 KO	8	DSYPDGNITWYR	13	Fucosylated	DSYPDGNITWYR-N4H5F3S0G0	N4H5F3S0G0
FUT8 KO	CD166 antigen	Membrane	WT+FUT8 KO	8	LSLSENYTLSINNAK	24	Core-fucosylated	LSLSENYTLSINNAK-N7H8F2S0G0	N7H8F2S0G0
FUT8 KO	CD166 antigen	Membrane	WT+FUT8 KO	8	LSLSENYTLSINNAK	24	Fucosylated	LSLSENYTLSINNAK-N7H8F2S0G0	N7H8F2S0G0
FUT8 KO	CD166 antigen	Membrane	WT+FUT8 KO	8	NATVVWMK	36	Core-fucosylated	NATVVWMK-N4H5F3S0G0	N4H5F3S0G0
FUT8 KO	CD166 antigen	Membrane	WT+FUT8 KO	8	NATVVWMK	36	Fucosylated	NATVVWMK-N4H5F3S0G0	N4H5F3S0G0
FUT8 KO	CD166 antigen	Membrane	WT+FUT8 KO	8	NATVVWMK	36	Core-fucosylated	NATVVWMK-N7H8F2S0G0	N7H8F2S0G0
FUT8 KO	CD166 antigen	Membrane	WT+FUT8 KO	8	NATVVWMK	36	Fucosylated	NATVVWMK-N7H8F2S0G0	N7H8F2S0G0
FUT8 KO	CD44 antigen	Membrane	WT+FUT8 KO	2	TEAADLCQAFNSTLPTMEQMQK	38	Core-fucosylated	TEAADLCQAFNSTLPTMEQMQK-N5H6F2S0G0	N5H6F2S0G0
FUT8 KO	CD44 antigen	Membrane	WT+FUT8 KO	2	TEAADLCQAFNSTLPTMEQMQK	38	Fucosylated	TEAADLCQAFNSTLPTMEQMQK-N5H6F2S0G0	N5H6F2S0G0
FUT8 KO	CD44 antigen	Membrane	WT+FUT8 KO	2	TEAADLCQAFNSTLPTMEQMQK	38	Core-fucosylated	TEAADLCQAFNSTLPTMEQMQK-N5H6F4S0G0	N5H6F4S0G0
FUT8 KO	CD44 antigen	Membrane	WT+FUT8 KO	2	TEAADLCQAFNSTLPTMEQMQK	38	Fucosylated	TEAADLCQAFNSTLPTMEQMQK-N5H6F4S0G0	N5H6F4S0G0
FUT8 KO	CD44 antigen	Membrane	WT+FUT8 KO	2	TEAADLCQAFNSTLPTMEQMQK	38	Core-fucosylated	TEAADLCQAFNSTLPTMEQMQK-N7H8F1S0G0	N7H8F1S0G0
FUT8 KO	CD44 antigen	Membrane	WT+FUT8 KO	2	TEAADLCQAFNSTLPTMEQMQK	38	Fucosylated	TEAADLCQAFNSTLPTMEQMQK-N7H8F1S0G0	N7H8F1S0G0
FUT8 KO	CD44 antigen	Membrane	WT+FUT8 KO	2	TEAADLCQAFNSTLPTMEQMQK	38	Core-fucosylated	TEAADLCQAFNSTLPTMEQMQK-N7H8F2S0G0	N7H8F2S0G0
FUT8 KO	CD44 antigen	Membrane	WT+FUT8 KO	2	TEAADLCQAFNSTLPTMEQMQK	38	Fucosylated	TEAADLCQAFNSTLPTMEQMQK-N7H8F2S0G0	N7H8F2S0G0
FUT8 KO	CD44 antigen	Membrane	WT+FUT8 KO	2	TEAADLCQAFNSTLPTMEQMQK	38	Core-fucosylated	TEAADLCQAFNSTLPTMEQMQK-N8H9F1S0G0	N8H9F1S0G0
FUT8 KO	CD44 antigen	Membrane	WT+FUT8 KO	2	TEAADLCQAFNSTLPTMEQMQK	38	Fucosylated	TEAADLCQAFNSTLPTMEQMQK-N8H9F1S0G0	N8H9F1S0G0
FUT8 KO	CD44 antigen	Membrane	WT+FUT8 KO	2	TEAADLCQAFNSTLPTMEQMQK	38	Core-fucosylated	TEAADLCQAFNSTLPTMEQMQK-N8H9F2S0G0	N8H9F2S0G0
FUT8 KO	CD44 antigen	Membrane	WT+FUT8 KO	2	TEAADLCQAFNSTLPTMEQMQK	38	Fucosylated	TEAADLCQAFNSTLPTMEQMQK-N8H9F2S0G0	N8H9F2S0G0
FUT8 KO	CD44 antigen	Membrane	WT+FUT8 KO	2	TEAADLCQAFNSTLPTMEQMQK	38	Core-fucosylated	TEAADLCQAFNSTLPTMEQMQK-N9H10F4S0G0	N9H10F4S0G0
FUT8 KO	CD44 antigen	Membrane	WT+FUT8 KO	2	TEAADLCQAFNSTLPTMEQMQK	38	Fucosylated	TEAADLCQAFNSTLPTMEQMQK-N9H10F4S0G0	N9H10F4S0G0
FUT8 KO	CD59 glycoprotein	Membrane	WT+FUT8 KO	1	TNATCSVNVDSCLVAVSGR	35	Core-fucosylated	TNATCSVNVDSCLVAVSGR-N4H5F3S0G0	N4H5F3S0G0
FUT8 KO	CD59 glycoprotein	Membrane	WT+FUT8 KO	1	TNATCSVNVDSCLVAVSGR	35	Fucosylated	TNATCSVNVDSCLVAVSGR-N4H5F3S0G0	N4H5F3S0G0
FUT8 KO	CD59 glycoprotein	Membrane	WT+FUT8 KO	1	TNATCSVNVDSCLVAVSGR	35	Core-fucosylated	TNATCSVNVDSCLVAVSGR-N5H6F3S0G0	N5H6F3S0G0
FUT8 KO	CD59 glycoprotein	Membrane	WT+FUT8 KO	1	TNATCSVNVDSCLVAVSGR	35	Fucosylated	TNATCSVNVDSCLVAVSGR-N5H6F3S0G0	N5H6F3S0G0
FUT8 KO	CD59 glycoprotein	Membrane	WT+FUT8 KO	1	TNATCSVNVDSCLVAVSGR	35	Core-fucosylated	TNATCSVNVDSCLVAVSGR-N8H9F7S0G0	N8H9F7S0G0
FUT8 KO	CD59 glycoprotein	Membrane	WT+FUT8 KO	1	TNATCSVNVDSCLVAVSGR	35	Fucosylated	TNATCSVNVDSCLVAVSGR-N8H9F7S0G0	N8H9F7S0G0
FUT8 KO	CD59 glycoprotein	Membrane	WT+FUT8 KO	1	TNATCSVNVDSCLVAVSGR	35	Core-fucosylated	TNATCSVNVDSCLVAVSGR-N9H10F2S0G0	N9H10F2S0G0
FUT8 KO	CD59 glycoprotein	Membrane	WT+FUT8 KO	1	TNATCSVNVDSCLVAVSGR	35	Fucosylated	TNATCSVNVDSCLVAVSGR-N9H10F2S0G0	N9H10F2S0G0
FUT8 KO	CD63 antigen	Membrane	WT+FUT8 KO	1	DRVPDSCCINITVGCGIDFK	21	Core-fucosylated	DRVPDSCCINITVGCGIDFK-N10H11F7S0G0	N10H11F7S0G0
FUT8 KO	CD63 antigen	Membrane	WT+FUT8 KO	1	DRVPDSCCINITVGCGIDFK	21	Fucosylated	DRVPDSCCINITVGCGIDFK-N10H11F7S0G0	N10H11F7S0G0
FUT8 KO	CD63 antigen	Membrane	WT+FUT8 KO	1	DRVPDSCCINITVGCGIDFK	21	Core-fucosylated	DRVPDSCCINITVGCGIDFK-N8H9F7S0G0	N8H9F7S0G0
FUT8 KO	CD63 antigen	Membrane	WT+FUT8 KO	1	DRVPDSCCINITVGCGIDFK	21	Fucosylated	DRVPDSCCINITVGCGIDFK-N8H9F7S0G0	N8H9F7S0G0
FUT8 KO	CD63 antigen	Membrane	WT+FUT8 KO	1	DRVPDSCCINITVGCGIDFK	21	Core-fucosylated	DRVPDSCCINITVGCGIDFK-N9H10F7S0G0	N9H10F7S0G0
FUT8 KO	CD63 antigen	Membrane	WT+FUT8 KO	1	DRVPDSCCINITVGCGIDFK	21	Fucosylated	DRVPDSCCINITVGCGIDFK-N9H10F7S0G0	N9H10F7S0G0
FUT8 KO	choline transporter-like protein 2	Membrane	WT+FUT8 KO	4	NITELVEGAK	2	Core-fucosylated	NITELVEGAK-N7H8F5S0G0	N7H8F5S0G0
FUT8 KO	choline transporter-like protein 2	Membrane	WT+FUT8 KO	4	NITELVEGAK	2	Fucosylated	NITELVEGAK-N7H8F5S0G0	N7H8F5S0G0
FUT8 KO	choline transporter-like protein 2	Membrane	WT+FUT8 KO	4	NITELVEGAK	2	Core-fucosylated	NITELVEGAK-N8H9F7S0G0	N8H9F7S0G0
FUT8 KO	choline transporter-like protein 2	Membrane	WT+FUT8 KO	4	NITELVEGAK	2	Fucosylated	NITELVEGAK-N8H9F7S0G0	N8H9F7S0G0
FUT8 KO	chondroitin sulfate proteoglycan 4	Membrane	WT+FUT8 KO	4	VQNFSVPEGGTR	28	Core-fucosylated	VQNFSVPEGGTR-N4H5F1S0G0	N4H5F1S0G0
FUT8 KO	chondroitin sulfate proteoglycan 4	Membrane	WT+FUT8 KO	4	VQNFSVPEGGTR	28	Fucosylated	VQNFSVPEGGTR-N4H5F1S0G0	N4H5F1S0G0
FUT8 KO	chondroitin sulfate proteoglycan 4	Membrane	WT+FUT8 KO	4	VQNFSVPEGGTR	28	Core-fucosylated	VQNFSVPEGGTR-N4H5F3S0G0	N4H5F3S0G0
FUT8 KO	chondroitin sulfate proteoglycan 4	Membrane	WT+FUT8 KO	4	VQNFSVPEGGTR	28	Fucosylated	VQNFSVPEGGTR-N4H5F3S0G0	N4H5F3S0G0
FUT8 KO	chondroitin sulfate proteoglycan 4	Membrane	WT+FUT8 KO	4	VQNFSVPEGGTR	28	Core-fucosylated	VQNFSVPEGGTR-N5H6F1S0G0	N5H6F1S0G0
FUT8 KO	chondroitin sulfate proteoglycan 4	Membrane	WT+FUT8 KO	4	VQNFSVPEGGTR	28	Fucosylated	VQNFSVPEGGTR-N5H6F1S0G0	N5H6F1S0G0
FUT8 KO	chondroitin sulfate proteoglycan 4	Membrane	WT+FUT8 KO	4	VQNFSVPEGGTR	28	Core-fucosylated	VQNFSVPEGGTR-N5H6F3S0G0	N5H6F3S0G0
FUT8 KO	chondroitin sulfate proteoglycan 4	Membrane	WT+FUT8 KO	4	VQNFSVPEGGTR	28	Fucosylated	VQNFSVPEGGTR-N5H6F3S0G0	N5H6F3S0G0
FUT8 KO	chondroitin sulfate proteoglycan 4	Membrane	WT+FUT8 KO	4	VQNFSVPEGGTR	28	Core-fucosylated	VQNFSVPEGGTR-N6H7F3S0G0	N6H7F3S0G0
FUT8 KO	chondroitin sulfate proteoglycan 4	Membrane	WT+FUT8 KO	4	VQNFSVPEGGTR	28	Fucosylated	VQNFSVPEGGTR-N6H7F3S0G0	N6H7F3S0G0
FUT8 KO	complement component receptor 1-like protein	Membrane	WT+FUT8 KO	4	CQSNASWVPSLGK	25	Core-fucosylated	CQSNASWVPSLGK-N4H5F1S0G0	N4H5F1S0G0
FUT8 KO	complement component receptor 1-like protein	Membrane	WT+FUT8 KO	4	CQSNASWVPSLGK	25	Fucosylated	CQSNASWVPSLGK-N4H5F1S0G0	N4H5F1S0G0
FUT8 KO	complement component receptor 1-like protein	Membrane	WT+FUT8 KO	4	CQSNASWVPSLGK	25	Core-fucosylated	CQSNASWVPSLGK-N4H5F3S0G0	N4H5F3S0G0
FUT8 KO	complement component receptor 1-like protein	Membrane	WT+FUT8 KO	4	CQSNASWVPSLGK	25	Fucosylated	CQSNASWVPSLGK-N4H5F3S0G0	N4H5F3S0G0
FUT8 KO	cysteine-rich with EGF-like domain protein 1	Membrane	WT+FUT8 KO	1	NSSHLVCSACFGPCAR	11	Core-fucosylated	NSSHLVCSACFGPCAR-N4H3F1S0G0	N4H3F1S0G0
FUT8 KO	cysteine-rich with EGF-like domain protein 1	Membrane	WT+FUT8 KO	1	NSSHLVCSACFGPCAR	11	Fucosylated	NSSHLVCSACFGPCAR-N4H3F1S0G0	N4H3F1S0G0
FUT8 KO	decorin	Extracellular region	WT+FUT8 KO	3	IADTNITAIPQGLPPSLTELHLDGNK	7	Core-fucosylated	IADTNITAIPQGLPPSLTELHLDGNK-N4H5F2S0G0	N4H5F2S0G0
FUT8 KO	decorin	Extracellular region	WT+FUT8 KO	3	IADTNITAIPQGLPPSLTELHLDGNK	7	Fucosylated	IADTNITAIPQGLPPSLTELHLDGNK-N4H5F2S0G0	N4H5F2S0G0
FUT8 KO	ectonucleotide pyrophosphatase/phosphodiesterase family member 1	Membrane	WT+FUT8 KO	2	MNASFSLK	9	Core-fucosylated	MNASFSLK-N4H5F3S0G0	N4H5F3S0G0
FUT8 KO	ectonucleotide pyrophosphatase/phosphodiesterase family member 1	Membrane	WT+FUT8 KO	2	MNASFSLK	9	Fucosylated	MNASFSLK-N4H5F3S0G0	N4H5F3S0G0
FUT8 KO	ectonucleotide pyrophosphatase/phosphodiesterase family member 1	Membrane	WT+FUT8 KO	2	VYNGSVPFEER	3	Core-fucosylated	VYNGSVPFEER-N4H5F1S0G0	N4H5F1S0G0
FUT8 KO	ectonucleotide pyrophosphatase/phosphodiesterase family member 1	Membrane	WT+FUT8 KO	2	VYNGSVPFEER	3	Fucosylated	VYNGSVPFEER-N4H5F1S0G0	N4H5F1S0G0
FUT8 KO	ectonucleotide pyrophosphatase/phosphodiesterase family member 1	Membrane	WT+FUT8 KO	2	VYNGSVPFEER	3	Core-fucosylated	VYNGSVPFEER-N4H5F3S0G0	N4H5F3S0G0
FUT8 KO	ectonucleotide pyrophosphatase/phosphodiesterase family member 1	Membrane	WT+FUT8 KO	2	VYNGSVPFEER	3	Fucosylated	VYNGSVPFEER-N4H5F3S0G0	N4H5F3S0G0
FUT8 KO	endoplasmic reticulum aminopeptidase 1	Membrane	WT+FUT8 KO	1	CFNAMEVDAFNSSHPVSTPVENPAQIR	15	Core-fucosylated	CFNAMEVDAFNSSHPVSTPVENPAQIR-N4H3F1S0G0	N4H3F1S0G0
FUT8 KO	endoplasmic reticulum aminopeptidase 1	Membrane	WT+FUT8 KO	1	CFNAMEVDAFNSSHPVSTPVENPAQIR	15	Fucosylated	CFNAMEVDAFNSSHPVSTPVENPAQIR-N4H3F1S0G0	N4H3F1S0G0
FUT8 KO	endoplasmic reticulum-Golgi intermediate compartment protein 3	Membrane	WT+FUT8 KO	2	SFQQSHVHVHDLQSFGLDNINMTHYIK	9	Core-fucosylated	SFQQSHVHVHDLQSFGLDNINMTHYIK-N4H5F2S0G0	N4H5F2S0G0
FUT8 KO	endoplasmic reticulum-Golgi intermediate compartment protein 3	Membrane	WT+FUT8 KO	2	SFQQSHVHVHDLQSFGLDNINMTHYIK	9	Fucosylated	SFQQSHVHVHDLQSFGLDNINMTHYIK-N4H5F2S0G0	N4H5F2S0G0
FUT8 KO	ephrin type-A receptor 2	Membrane	WT+FUT8 KO	2	TASVSINQTEPPK	4	Core-fucosylated	TASVSINQTEPPK-N4H5F3S0G0	N4H5F3S0G0
FUT8 KO	ephrin type-A receptor 2	Membrane	WT+FUT8 KO	2	TASVSINQTEPPK	4	Fucosylated	TASVSINQTEPPK-N4H5F3S0G0	N4H5F3S0G0
FUT8 KO	fibronectin	Membrane	WT+FUT8 KO	3	LDAPTNLQFVNESDR	8	Core-fucosylated	LDAPTNLQFVNESDR-N4H5F3S0G0	N4H5F3S0G0
FUT8 KO	fibronectin	Membrane	WT+FUT8 KO	3	LDAPTNLQFVNESDR	8	Fucosylated	LDAPTNLQFVNESDR-N4H5F3S0G0	N4H5F3S0G0
FUT8 KO	immunoglobulin superfamily member 8	Membrane	WT+FUT8 KO	3	GETASLLCNISVR	4	Core-fucosylated	GETASLLCNISVR-N4H5F3S0G0	N4H5F3S0G0
FUT8 KO	immunoglobulin superfamily member 8	Membrane	WT+FUT8 KO	3	GETASLLCNISVR	4	Fucosylated	GETASLLCNISVR-N4H5F3S0G0	N4H5F3S0G0
FUT8 KO	inactive rhomboid protein 2	Membrane	WT+FUT8 KO	2	WQNDTGPSDLSEGQK	10	Core-fucosylated	WQNDTGPSDLSEGQK-N5H6F3S0G0	N5H6F3S0G0
FUT8 KO	inactive rhomboid protein 2	Membrane	WT+FUT8 KO	2	WQNDTGPSDLSEGQK	10	Fucosylated	WQNDTGPSDLSEGQK-N5H6F3S0G0	N5H6F3S0G0
FUT8 KO	integrin beta-1	Membrane	WT+FUT8 KO	8	DTCAQECSHFNLTK	28	Core-fucosylated	DTCAQECSHFNLTK-N4H5F1S0G0	N4H5F1S0G0
FUT8 KO	integrin beta-1	Membrane	WT+FUT8 KO	8	DTCAQECSHFNLTK	28	Fucosylated	DTCAQECSHFNLTK-N4H5F1S0G0	N4H5F1S0G0
FUT8 KO	integrin beta-1	Membrane	WT+FUT8 KO	8	DTCAQECSHFNLTK	28	Core-fucosylated	DTCAQECSHFNLTK-N5H6F3S0G0	N5H6F3S0G0
FUT8 KO	integrin beta-1	Membrane	WT+FUT8 KO	8	DTCAQECSHFNLTK	28	Fucosylated	DTCAQECSHFNLTK-N5H6F3S0G0	N5H6F3S0G0
FUT8 KO	integrin beta-1	Membrane	WT+FUT8 KO	8	DTCAQECSHFNLTK	28	Core-fucosylated	DTCAQECSHFNLTK-N6H7F3S0G0	N6H7F3S0G0
FUT8 KO	integrin beta-1	Membrane	WT+FUT8 KO	8	DTCAQECSHFNLTK	28	Fucosylated	DTCAQECSHFNLTK-N6H7F3S0G0	N6H7F3S0G0
FUT8 KO	integrin beta-1	Membrane	WT+FUT8 KO	8	KENSSEICSNNGECVCGQCVCR	42	Core-fucosylated	KENSSEICSNNGECVCGQCVCR-N6H7F4S0G0	N6H7F4S0G0
FUT8 KO	integrin beta-1	Membrane	WT+FUT8 KO	8	KENSSEICSNNGECVCGQCVCR	42	Fucosylated	KENSSEICSNNGECVCGQCVCR-N6H7F4S0G0	N6H7F4S0G0
FUT8 KO	integrin beta-1	Membrane	WT+FUT8 KO	8	KENSSEICSNNGECVCGQCVCR	42	Core-fucosylated	KENSSEICSNNGECVCGQCVCR-N8H9F1S0G0	N8H9F1S0G0
FUT8 KO	integrin beta-1	Membrane	WT+FUT8 KO	8	KENSSEICSNNGECVCGQCVCR	42	Fucosylated	KENSSEICSNNGECVCGQCVCR-N8H9F1S0G0	N8H9F1S0G0
FUT8 KO	integrin beta-1	Membrane	WT+FUT8 KO	8	KENSSEICSNNGECVCGQCVCR	42	Core-fucosylated	KENSSEICSNNGECVCGQCVCR-N8H9F2S0G0	N8H9F2S0G0
FUT8 KO	integrin beta-1	Membrane	WT+FUT8 KO	8	KENSSEICSNNGECVCGQCVCR	42	Fucosylated	KENSSEICSNNGECVCGQCVCR-N8H9F2S0G0	N8H9F2S0G0
FUT8 KO	integrin beta-1	Membrane	WT+FUT8 KO	8	KENSSEICSNNGECVCGQCVCR	42	Core-fucosylated	KENSSEICSNNGECVCGQCVCR-N8H9F4S0G0	N8H9F4S0G0
FUT8 KO	integrin beta-1	Membrane	WT+FUT8 KO	8	KENSSEICSNNGECVCGQCVCR	42	Fucosylated	KENSSEICSNNGECVCGQCVCR-N8H9F4S0G0	N8H9F4S0G0
FUT8 KO	integrin beta-1	Membrane	WT+FUT8 KO	8	KENSSEICSNNGECVCGQCVCR	42	Core-fucosylated	KENSSEICSNNGECVCGQCVCR-N9H10F4S0G0	N9H10F4S0G0
FUT8 KO	integrin beta-1	Membrane	WT+FUT8 KO	8	KENSSEICSNNGECVCGQCVCR	42	Fucosylated	KENSSEICSNNGECVCGQCVCR-N9H10F4S0G0	N9H10F4S0G0
FUT8 KO	integrin beta-1	Membrane	WT+FUT8 KO	8	LRNPCTSEQNCTSPFSYK	35	Core-fucosylated	LRNPCTSEQNCTSPFSYK-N6H7F4S0G0	N6H7F4S0G0
FUT8 KO	integrin beta-1	Membrane	WT+FUT8 KO	8	LRNPCTSEQNCTSPFSYK	35	Fucosylated	LRNPCTSEQNCTSPFSYK-N6H7F4S0G0	N6H7F4S0G0
FUT8 KO	integrin beta-1	Membrane	WT+FUT8 KO	8	LRNPCTSEQNCTSPFSYK	35	Core-fucosylated	LRNPCTSEQNCTSPFSYK-N8H9F2S0G0	N8H9F2S0G0
FUT8 KO	integrin beta-1	Membrane	WT+FUT8 KO	8	LRNPCTSEQNCTSPFSYK	35	Fucosylated	LRNPCTSEQNCTSPFSYK-N8H9F2S0G0	N8H9F2S0G0
FUT8 KO	integrin beta-5	Membrane	WT+FUT8 KO	7	DCVECLLLHLGKPDNQTCHHQCK	23	Core-fucosylated	DCVECLLLHLGKPDNQTCHHQCK-N9H10F2S0G0	N9H10F2S0G0
FUT8 KO	integrin beta-5	Membrane	WT+FUT8 KO	7	DCVECLLLHLGKPDNQTCHHQCK	23	Fucosylated	DCVECLLLHLGKPDNQTCHHQCK-N9H10F2S0G0	N9H10F2S0G0
FUT8 KO	intercellular adhesion molecule 1	Membrane	WT+FUT8 KO	6	LSGAPPGQVQFTLNASSEDHER	51	Core-fucosylated	LSGAPPGQVQFTLNASSEDHER-N6H7F1S0G0	N6H7F1S0G0
FUT8 KO	intercellular adhesion molecule 1	Membrane	WT+FUT8 KO	6	LSGAPPGQVQFTLNASSEDHER	51	Fucosylated	LSGAPPGQVQFTLNASSEDHER-N6H7F1S0G0	N6H7F1S0G0
FUT8 KO	intercellular adhesion molecule 1	Membrane	WT+FUT8 KO	6	LSGAPPGQVQFTLNASSEDHER	51	Core-fucosylated	LSGAPPGQVQFTLNASSEDHER-N6H7F2S0G0	N6H7F2S0G0
FUT8 KO	intercellular adhesion molecule 1	Membrane	WT+FUT8 KO	6	LSGAPPGQVQFTLNASSEDHER	51	Fucosylated	LSGAPPGQVQFTLNASSEDHER-N6H7F2S0G0	N6H7F2S0G0
FUT8 KO	intercellular adhesion molecule 1	Membrane	WT+FUT8 KO	6	VAGQELLKNQTLK	10	Core-fucosylated	VAGQELLKNQTLK-N4H5F1S0G0	N4H5F1S0G0
FUT8 KO	intercellular adhesion molecule 1	Membrane	WT+FUT8 KO	6	VAGQELLKNQTLK	10	Fucosylated	VAGQELLKNQTLK-N4H5F1S0G0	N4H5F1S0G0
FUT8 KO	intercellular adhesion molecule 1	Membrane	WT+FUT8 KO	6	VAGQELLKNQTLK	10	Core-fucosylated	VAGQELLKNQTLK-N4H5F3S0G0	N4H5F3S0G0
FUT8 KO	intercellular adhesion molecule 1	Membrane	WT+FUT8 KO	6	VAGQELLKNQTLK	10	Fucosylated	VAGQELLKNQTLK-N4H5F3S0G0	N4H5F3S0G0
FUT8 KO	intercellular adhesion molecule 1	Membrane	WT+FUT8 KO	6	VAGQELLKNQTLK	10	Core-fucosylated	VAGQELLKNQTLK-N5H6F1S0G0	N5H6F1S0G0
FUT8 KO	intercellular adhesion molecule 1	Membrane	WT+FUT8 KO	6	VAGQELLKNQTLK	10	Fucosylated	VAGQELLKNQTLK-N5H6F1S0G0	N5H6F1S0G0
FUT8 KO	intercellular adhesion molecule 1	Membrane	WT+FUT8 KO	6	VAGQELLKNQTLK	10	Core-fucosylated	VAGQELLKNQTLK-N5H6F3S0G0	N5H6F3S0G0
FUT8 KO	intercellular adhesion molecule 1	Membrane	WT+FUT8 KO	6	VAGQELLKNQTLK	10	Fucosylated	VAGQELLKNQTLK-N5H6F3S0G0	N5H6F3S0G0
FUT8 KO	laminin subunit alpha-5	Membrane	WT+FUT8 KO	16	GINASSTAWAR	5	Core-fucosylated	GINASSTAWAR-N4H5F3S0G0	N4H5F3S0G0
FUT8 KO	laminin subunit alpha-5	Membrane	WT+FUT8 KO	16	GINASSTAWAR	5	Fucosylated	GINASSTAWAR-N4H5F3S0G0	N4H5F3S0G0
FUT8 KO	laminin subunit alpha-5	Membrane	WT+FUT8 KO	16	GVHNASLALSANIGR	10	Core-fucosylated	GVHNASLALSANIGR-N4H4F1S0G0	N4H4F1S0G0
FUT8 KO	laminin subunit alpha-5	Membrane	WT+FUT8 KO	16	GVHNASLALSANIGR	10	Fucosylated	GVHNASLALSANIGR-N4H4F1S0G0	N4H4F1S0G0
FUT8 KO	laminin subunit alpha-5	Membrane	WT+FUT8 KO	16	GVHNASLALSANIGR	10	Core-fucosylated	GVHNASLALSANIGR-N4H5F1S0G0	N4H5F1S0G0
FUT8 KO	laminin subunit alpha-5	Membrane	WT+FUT8 KO	16	GVHNASLALSANIGR	10	Fucosylated	GVHNASLALSANIGR-N4H5F1S0G0	N4H5F1S0G0
FUT8 KO	laminin subunit alpha-5	Membrane	WT+FUT8 KO	16	GVHNASLALSANIGR	10	Core-fucosylated	GVHNASLALSANIGR-N4H5F3S0G0	N4H5F3S0G0
FUT8 KO	laminin subunit alpha-5	Membrane	WT+FUT8 KO	16	GVHNASLALSANIGR	10	Fucosylated	GVHNASLALSANIGR-N4H5F3S0G0	N4H5F3S0G0
FUT8 KO	laminin subunit alpha-5	Membrane	WT+FUT8 KO	16	LLANSSALEETILGHR	16	Core-fucosylated	LLANSSALEETILGHR-N4H5F3S0G0	N4H5F3S0G0
FUT8 KO	laminin subunit alpha-5	Membrane	WT+FUT8 KO	16	LLANSSALEETILGHR	16	Fucosylated	LLANSSALEETILGHR-N4H5F3S0G0	N4H5F3S0G0
FUT8 KO	laminin subunit alpha-5	Membrane	WT+FUT8 KO	16	LLANSSALEETILGHR	16	Core-fucosylated	LLANSSALEETILGHR-N7H8F2S0G0	N7H8F2S0G0
FUT8 KO	laminin subunit alpha-5	Membrane	WT+FUT8 KO	16	LLANSSALEETILGHR	16	Fucosylated	LLANSSALEETILGHR-N7H8F2S0G0	N7H8F2S0G0
FUT8 KO	laminin subunit alpha-5	Membrane	WT+FUT8 KO	16	LNTTGISFGCTADLLVGR	11	Core-fucosylated	LNTTGISFGCTADLLVGR-N4H5F1S0G0	N4H5F1S0G0
FUT8 KO	laminin subunit alpha-5	Membrane	WT+FUT8 KO	16	LNTTGISFGCTADLLVGR	11	Fucosylated	LNTTGISFGCTADLLVGR-N4H5F1S0G0	N4H5F1S0G0
FUT8 KO	laminin subunit alpha-5	Membrane	WT+FUT8 KO	16	LNTTGISFGCTADLLVGR	11	Core-fucosylated	LNTTGISFGCTADLLVGR-N4H5F3S0G0	N4H5F3S0G0
FUT8 KO	laminin subunit alpha-5	Membrane	WT+FUT8 KO	16	LNTTGISFGCTADLLVGR	11	Fucosylated	LNTTGISFGCTADLLVGR-N4H5F3S0G0	N4H5F3S0G0
FUT8 KO	laminin subunit alpha-5	Membrane	WT+FUT8 KO	16	NFTPPEPLR	13	Core-fucosylated	NFTPPEPLR-N4H5F1S0G0	N4H5F1S0G0
FUT8 KO	laminin subunit alpha-5	Membrane	WT+FUT8 KO	16	NFTPPEPLR	13	Fucosylated	NFTPPEPLR-N4H5F1S0G0	N4H5F1S0G0
FUT8 KO	laminin subunit alpha-5	Membrane	WT+FUT8 KO	16	NFTPPEPLR	13	Core-fucosylated	NFTPPEPLR-N4H5F3S0G0	N4H5F3S0G0
FUT8 KO	laminin subunit alpha-5	Membrane	WT+FUT8 KO	16	NFTPPEPLR	13	Fucosylated	NFTPPEPLR-N4H5F3S0G0	N4H5F3S0G0
FUT8 KO	LEM domain-containing protein 2	Membrane	WT+FUT8 KO	1	CIPVLEAQEYIANVTSSPSAR	9	Core-fucosylated	CIPVLEAQEYIANVTSSPSAR-N2H4F1S0G0	N2H4F1S0G0
FUT8 KO	LEM domain-containing protein 2	Membrane	WT+FUT8 KO	1	CIPVLEAQEYIANVTSSPSAR	9	Fucosylated	CIPVLEAQEYIANVTSSPSAR-N2H4F1S0G0	N2H4F1S0G0
FUT8 KO	leucyl-cystinyl aminopeptidase	Membrane	WT+FUT8 KO	8	EETLLYDNASSSVADR	13	Core-fucosylated	EETLLYDNASSSVADR-N5H6F3S0G0	N5H6F3S0G0
FUT8 KO	leucyl-cystinyl aminopeptidase	Membrane	WT+FUT8 KO	8	EETLLYDNASSSVADR	13	Fucosylated	EETLLYDNASSSVADR-N5H6F3S0G0	N5H6F3S0G0
FUT8 KO	leucyl-cystinyl aminopeptidase	Membrane	WT+FUT8 KO	8	EETLLYDNASSSVADR	13	Core-fucosylated	EETLLYDNASSSVADR-N7H8F2S0G0	N7H8F2S0G0
FUT8 KO	leucyl-cystinyl aminopeptidase	Membrane	WT+FUT8 KO	8	EETLLYDNASSSVADR	13	Fucosylated	EETLLYDNASSSVADR-N7H8F2S0G0	N7H8F2S0G0
FUT8 KO	low-density lipoprotein receptor	Membrane	WT+FUT8 KO	2	DMSDELGCINVTQCDGPNK	13	Core-fucosylated	DMSDELGCINVTQCDGPNK-N4H5F3S0G0	N4H5F3S0G0
FUT8 KO	low-density lipoprotein receptor	Membrane	WT+FUT8 KO	2	DMSDELGCINVTQCDGPNK	13	Fucosylated	DMSDELGCINVTQCDGPNK-N4H5F3S0G0	N4H5F3S0G0
FUT8 KO	lysosomal alpha-glucosidase	Membrane	WT+FUT8 KO	6	NDTIVNELVHVAK	21	Core-fucosylated	NDTIVNELVHVAK-N5H6F4S0G0	N5H6F4S0G0
FUT8 KO	lysosomal alpha-glucosidase	Membrane	WT+FUT8 KO	6	NDTIVNELVHVAK	21	Fucosylated	NDTIVNELVHVAK-N5H6F4S0G0	N5H6F4S0G0
FUT8 KO	lysosome membrane protein 2	Membrane	WT+FUT8 KO	6	NQSVGDTNVDLIR	25	Core-fucosylated	NQSVGDTNVDLIR-N4H4F1S0G0	N4H4F1S0G0
FUT8 KO	lysosome membrane protein 2	Membrane	WT+FUT8 KO	6	NQSVGDTNVDLIR	25	Fucosylated	NQSVGDTNVDLIR-N4H4F1S0G0	N4H4F1S0G0
FUT8 KO	lysosome membrane protein 2	Membrane	WT+FUT8 KO	6	NQSVGDTNVDLIR	25	Core-fucosylated	NQSVGDTNVDLIR-N4H5F1S0G0	N4H5F1S0G0
FUT8 KO	lysosome membrane protein 2	Membrane	WT+FUT8 KO	6	NQSVGDTNVDLIR	25	Fucosylated	NQSVGDTNVDLIR-N4H5F1S0G0	N4H5F1S0G0
FUT8 KO	lysosome membrane protein 2	Membrane	WT+FUT8 KO	6	NQSVGDTNVDLIR	25	Core-fucosylated	NQSVGDTNVDLIR-N4H5F3S0G0	N4H5F3S0G0
FUT8 KO	lysosome membrane protein 2	Membrane	WT+FUT8 KO	6	NQSVGDTNVDLIR	25	Fucosylated	NQSVGDTNVDLIR-N4H5F3S0G0	N4H5F3S0G0
FUT8 KO	lysosome-associated membrane glycoprotein 1	Membrane	WT+FUT8 KO	4	ALNISPNDTASGSCSPHVVTLTVESK	74	Core-fucosylated	ALNISPNDTASGSCSPHVVTLTVESK-N6H7F3S0G0	N6H7F3S0G0
FUT8 KO	lysosome-associated membrane glycoprotein 1	Membrane	WT+FUT8 KO	4	ALNISPNDTASGSCSPHVVTLTVESK	74	Fucosylated	ALNISPNDTASGSCSPHVVTLTVESK-N6H7F3S0G0	N6H7F3S0G0
FUT8 KO	lysosome-associated membrane glycoprotein 1	Membrane	WT+FUT8 KO	4	FGMNGSSSLFFLQEVR	52	Core-fucosylated	FGMNGSSSLFFLQEVR-N4H5F1S0G0	N4H5F1S0G0
FUT8 KO	lysosome-associated membrane glycoprotein 1	Membrane	WT+FUT8 KO	4	FGMNGSSSLFFLQEVR	52	Fucosylated	FGMNGSSSLFFLQEVR-N4H5F1S0G0	N4H5F1S0G0
FUT8 KO	lysosome-associated membrane glycoprotein 1	Membrane	WT+FUT8 KO	4	FGMNGSSSLFFLQEVR	52	Core-fucosylated	FGMNGSSSLFFLQEVR-N4H5F3S0G0	N4H5F3S0G0
FUT8 KO	lysosome-associated membrane glycoprotein 1	Membrane	WT+FUT8 KO	4	FGMNGSSSLFFLQEVR	52	Fucosylated	FGMNGSSSLFFLQEVR-N4H5F3S0G0	N4H5F3S0G0
FUT8 KO	lysosome-associated membrane glycoprotein 1	Membrane	WT+FUT8 KO	4	FGMNGSSSLFFLQEVR	52	Core-fucosylated	FGMNGSSSLFFLQEVR-N5H6F1S0G0	N5H6F1S0G0
FUT8 KO	lysosome-associated membrane glycoprotein 1	Membrane	WT+FUT8 KO	4	FGMNGSSSLFFLQEVR	52	Fucosylated	FGMNGSSSLFFLQEVR-N5H6F1S0G0	N5H6F1S0G0
FUT8 KO	lysosome-associated membrane glycoprotein 1	Membrane	WT+FUT8 KO	4	FGMNGSSSLFFLQEVR	52	Core-fucosylated	FGMNGSSSLFFLQEVR-N5H6F3S0G0	N5H6F3S0G0
FUT8 KO	lysosome-associated membrane glycoprotein 1	Membrane	WT+FUT8 KO	4	FGMNGSSSLFFLQEVR	52	Fucosylated	FGMNGSSSLFFLQEVR-N5H6F3S0G0	N5H6F3S0G0
FUT8 KO	lysosome-associated membrane glycoprotein 1	Membrane	WT+FUT8 KO	4	FGMNGSSSLFFLQEVR	52	Core-fucosylated	FGMNGSSSLFFLQEVR-N6H7F3S0G0	N6H7F3S0G0
FUT8 KO	lysosome-associated membrane glycoprotein 1	Membrane	WT+FUT8 KO	4	FGMNGSSSLFFLQEVR	52	Fucosylated	FGMNGSSSLFFLQEVR-N6H7F3S0G0	N6H7F3S0G0
FUT8 KO	lysosome-associated membrane glycoprotein 1	Membrane	WT+FUT8 KO	4	FGMNGSSSLFFLQEVR	52	Core-fucosylated	FGMNGSSSLFFLQEVR-N7H8F3S0G0	N7H8F3S0G0
FUT8 KO	lysosome-associated membrane glycoprotein 1	Membrane	WT+FUT8 KO	4	FGMNGSSSLFFLQEVR	52	Fucosylated	FGMNGSSSLFFLQEVR-N7H8F3S0G0	N7H8F3S0G0
FUT8 KO	lysosome-associated membrane glycoprotein 1	Membrane	WT+FUT8 KO	4	FGMNGSSSLFFLQEVR	52	Core-fucosylated	FGMNGSSSLFFLQEVR-N8H9F2S0G0	N8H9F2S0G0
FUT8 KO	lysosome-associated membrane glycoprotein 1	Membrane	WT+FUT8 KO	4	FGMNGSSSLFFLQEVR	52	Fucosylated	FGMNGSSSLFFLQEVR-N8H9F2S0G0	N8H9F2S0G0
FUT8 KO	lysosome-associated membrane glycoprotein 2	Membrane	WT+FUT8 KO	6	VQPFNVTK	14	Core-fucosylated	VQPFNVTK-N4H5F2S0G0	N4H5F2S0G0
FUT8 KO	lysosome-associated membrane glycoprotein 2	Membrane	WT+FUT8 KO	6	VQPFNVTK	14	Fucosylated	VQPFNVTK-N4H5F2S0G0	N4H5F2S0G0
FUT8 KO	mammalian ependymin-related protein 1	Extracellular region	WT+FUT8 KO	1	NYTVVLSTR	8	Core-fucosylated	NYTVVLSTR-N4H4F1S0G0	N4H4F1S0G0
FUT8 KO	mammalian ependymin-related protein 1	Extracellular region	WT+FUT8 KO	1	NYTVVLSTR	8	Fucosylated	NYTVVLSTR-N4H4F1S0G0	N4H4F1S0G0
FUT8 KO	MHC class I antigen Hm1-C5	Membrane	WT+FUT8 KO	2	TLLGYYNQSEGGSHTIQR	38	Core-fucosylated	TLLGYYNQSEGGSHTIQR-N4H5F3S0G0	N4H5F3S0G0
FUT8 KO	MHC class I antigen Hm1-C5	Membrane	WT+FUT8 KO	2	TLLGYYNQSEGGSHTIQR	38	Fucosylated	TLLGYYNQSEGGSHTIQR-N4H5F3S0G0	N4H5F3S0G0
FUT8 KO	MLV-related proviral Env polyprotein-like	Membrane	WT+FUT8 KO	1	VYNITWK	12	Core-fucosylated	VYNITWK-N4H5F3S0G0	N4H5F3S0G0
FUT8 KO	MLV-related proviral Env polyprotein-like	Membrane	WT+FUT8 KO	1	VYNITWK	12	Fucosylated	VYNITWK-N4H5F3S0G0	N4H5F3S0G0
FUT8 KO	neogenin	Membrane	WT+FUT8 KO	5	TLSDVPSAAPQNLSLEVR	10	Core-fucosylated	TLSDVPSAAPQNLSLEVR-N4H5F3S0G0	N4H5F3S0G0
FUT8 KO	neogenin	Membrane	WT+FUT8 KO	5	TLSDVPSAAPQNLSLEVR	10	Fucosylated	TLSDVPSAAPQNLSLEVR-N4H5F3S0G0	N4H5F3S0G0
FUT8 KO	pantetheinase	Membrane	WT+FUT8 KO	3	GISGNHTVCQNDLCCHLSYQMSEK	7	Core-fucosylated	GISGNHTVCQNDLCCHLSYQMSEK-N8H9F2S0G0	N8H9F2S0G0
FUT8 KO	pantetheinase	Membrane	WT+FUT8 KO	3	GISGNHTVCQNDLCCHLSYQMSEK	7	Fucosylated	GISGNHTVCQNDLCCHLSYQMSEK-N8H9F2S0G0	N8H9F2S0G0
FUT8 KO	pantetheinase	Membrane	WT+FUT8 KO	3	NNSIYVVANMGDK	3	Core-fucosylated	NNSIYVVANMGDK-N8H9F2S0G0	N8H9F2S0G0
FUT8 KO	pantetheinase	Membrane	WT+FUT8 KO	3	NNSIYVVANMGDK	3	Fucosylated	NNSIYVVANMGDK-N8H9F2S0G0	N8H9F2S0G0
FUT8 KO	procollagen galactosyltransferase 1	Extracellular region	WT+FUT8 KO	2	AMNTSQVEALGIQMLPGYR	13	Core-fucosylated	AMNTSQVEALGIQMLPGYR-N2H5F1S0G0	N2H5F1S0G0
FUT8 KO	procollagen galactosyltransferase 1	Extracellular region	WT+FUT8 KO	2	AMNTSQVEALGIQMLPGYR	13	Fucosylated	AMNTSQVEALGIQMLPGYR-N2H5F1S0G0	N2H5F1S0G0
FUT8 KO	prolow-density lipoprotein receptor-related protein 1	Membrane	WT+FUT8 KO	30	CNASSQFLCSSGR	5	Core-fucosylated	CNASSQFLCSSGR-N4H5F3S0G0	N4H5F3S0G0
FUT8 KO	prolow-density lipoprotein receptor-related protein 1	Membrane	WT+FUT8 KO	30	CNASSQFLCSSGR	5	Fucosylated	CNASSQFLCSSGR-N4H5F3S0G0	N4H5F3S0G0
FUT8 KO	prolow-density lipoprotein receptor-related protein 1	Membrane	WT+FUT8 KO	30	FNSTEYQVVTR	15	Core-fucosylated	FNSTEYQVVTR-N4H5F1S0G0	N4H5F1S0G0
FUT8 KO	prolow-density lipoprotein receptor-related protein 1	Membrane	WT+FUT8 KO	30	FNSTEYQVVTR	15	Fucosylated	FNSTEYQVVTR-N4H5F1S0G0	N4H5F1S0G0
FUT8 KO	prolow-density lipoprotein receptor-related protein 1	Membrane	WT+FUT8 KO	30	FNSTEYQVVTR	15	Core-fucosylated	FNSTEYQVVTR-N4H5F3S0G0	N4H5F3S0G0
FUT8 KO	prolow-density lipoprotein receptor-related protein 1	Membrane	WT+FUT8 KO	30	FNSTEYQVVTR	15	Fucosylated	FNSTEYQVVTR-N4H5F3S0G0	N4H5F3S0G0
FUT8 KO	prolow-density lipoprotein receptor-related protein 1	Membrane	WT+FUT8 KO	30	GPCSHLCLINYNR	7	Core-fucosylated	GPCSHLCLINYNR-N4H5F3S0G0	N4H5F3S0G0
FUT8 KO	prolow-density lipoprotein receptor-related protein 1	Membrane	WT+FUT8 KO	30	GPCSHLCLINYNR	7	Fucosylated	GPCSHLCLINYNR-N4H5F3S0G0	N4H5F3S0G0
FUT8 KO	prolow-density lipoprotein receptor-related protein 1	Membrane	WT+FUT8 KO	30	GVTHLNISGLK	5	Core-fucosylated	GVTHLNISGLK-N4H5F3S0G0	N4H5F3S0G0
FUT8 KO	prolow-density lipoprotein receptor-related protein 1	Membrane	WT+FUT8 KO	30	GVTHLNISGLK	5	Fucosylated	GVTHLNISGLK-N4H5F3S0G0	N4H5F3S0G0
FUT8 KO	prolow-density lipoprotein receptor-related protein 1	Membrane	WT+FUT8 KO	30	IETILLNGTDR	4	Core-fucosylated	IETILLNGTDR-N4H5F3S0G0	N4H5F3S0G0
FUT8 KO	prolow-density lipoprotein receptor-related protein 1	Membrane	WT+FUT8 KO	30	IETILLNGTDR	4	Fucosylated	IETILLNGTDR-N4H5F3S0G0	N4H5F3S0G0
FUT8 KO	prolow-density lipoprotein receptor-related protein 1	Membrane	WT+FUT8 KO	30	LKDNTTCYEFK	7	Core-fucosylated	LKDNTTCYEFK-N4H5F3S0G0	N4H5F3S0G0
FUT8 KO	prolow-density lipoprotein receptor-related protein 1	Membrane	WT+FUT8 KO	30	LKDNTTCYEFK	7	Fucosylated	LKDNTTCYEFK-N4H5F3S0G0	N4H5F3S0G0
FUT8 KO	prolow-density lipoprotein receptor-related protein 1	Membrane	WT+FUT8 KO	30	LTSCATNASICGDEAR	24	Core-fucosylated	LTSCATNASICGDEAR-N4H5F1S0G0	N4H5F1S0G0
FUT8 KO	prolow-density lipoprotein receptor-related protein 1	Membrane	WT+FUT8 KO	30	LTSCATNASICGDEAR	24	Fucosylated	LTSCATNASICGDEAR-N4H5F1S0G0	N4H5F1S0G0
FUT8 KO	prolow-density lipoprotein receptor-related protein 1	Membrane	WT+FUT8 KO	30	LTSCATNASICGDEAR	24	Core-fucosylated	LTSCATNASICGDEAR-N4H5F3S0G0	N4H5F3S0G0
FUT8 KO	prolow-density lipoprotein receptor-related protein 1	Membrane	WT+FUT8 KO	30	LTSCATNASICGDEAR	24	Fucosylated	LTSCATNASICGDEAR-N4H5F3S0G0	N4H5F3S0G0
FUT8 KO	prolow-density lipoprotein receptor-related protein 1	Membrane	WT+FUT8 KO	30	LTSCATNASICGDEAR	24	Core-fucosylated	LTSCATNASICGDEAR-N7H8F2S0G0	N7H8F2S0G0
FUT8 KO	prolow-density lipoprotein receptor-related protein 1	Membrane	WT+FUT8 KO	30	LTSCATNASICGDEAR	24	Fucosylated	LTSCATNASICGDEAR-N7H8F2S0G0	N7H8F2S0G0
FUT8 KO	prolow-density lipoprotein receptor-related protein 1	Membrane	WT+FUT8 KO	30	MHLNGSNVQVLHR	13	Core-fucosylated	MHLNGSNVQVLHR-N4H5F3S0G0	N4H5F3S0G0
FUT8 KO	prolow-density lipoprotein receptor-related protein 1	Membrane	WT+FUT8 KO	30	MHLNGSNVQVLHR	13	Fucosylated	MHLNGSNVQVLHR-N4H5F3S0G0	N4H5F3S0G0
FUT8 KO	prolow-density lipoprotein receptor-related protein 1	Membrane	WT+FUT8 KO	30	MHLNGSNVQVLHR	13	Core-fucosylated	MHLNGSNVQVLHR-N5H6F3S0G0	N5H6F3S0G0
FUT8 KO	prolow-density lipoprotein receptor-related protein 1	Membrane	WT+FUT8 KO	30	MHLNGSNVQVLHR	13	Fucosylated	MHLNGSNVQVLHR-N5H6F3S0G0	N5H6F3S0G0
FUT8 KO	prolow-density lipoprotein receptor-related protein 1	Membrane	WT+FUT8 KO	30	WTGHNVTVVQR	7	Core-fucosylated	WTGHNVTVVQR-N4H5F1S0G0	N4H5F1S0G0
FUT8 KO	prolow-density lipoprotein receptor-related protein 1	Membrane	WT+FUT8 KO	30	WTGHNVTVVQR	7	Fucosylated	WTGHNVTVVQR-N4H5F1S0G0	N4H5F1S0G0
FUT8 KO	prolow-density lipoprotein receptor-related protein 1	Membrane	WT+FUT8 KO	30	WTGHNVTVVQR	7	Core-fucosylated	WTGHNVTVVQR-N4H5F3S0G0	N4H5F3S0G0
FUT8 KO	prolow-density lipoprotein receptor-related protein 1	Membrane	WT+FUT8 KO	30	WTGHNVTVVQR	7	Fucosylated	WTGHNVTVVQR-N4H5F3S0G0	N4H5F3S0G0
FUT8 KO	prolyl 4-hydroxylase subunit alpha-1	Membrane	WT+FUT8 KO	1	DMSDGFISNLTIQR	9	Core-fucosylated	DMSDGFISNLTIQR-N4H3F1S0G0	N4H3F1S0G0
FUT8 KO	prolyl 4-hydroxylase subunit alpha-1	Membrane	WT+FUT8 KO	1	DMSDGFISNLTIQR	9	Fucosylated	DMSDGFISNLTIQR-N4H3F1S0G0	N4H3F1S0G0
FUT8 KO	prosaposin	Extracellular region	WT+FUT8 KO	6	NNATQEEILR	13	Core-fucosylated	NNATQEEILR-N2H3F1S0G0	N2H3F1S0G0
FUT8 KO	prosaposin	Extracellular region	WT+FUT8 KO	6	NNATQEEILR	13	Fucosylated	NNATQEEILR-N2H3F1S0G0	N2H3F1S0G0
FUT8 KO	prosaposin	Extracellular region	WT+FUT8 KO	6	NNATQEEILR	13	Core-fucosylated	NNATQEEILR-N4H5F3S0G0	N4H5F3S0G0
FUT8 KO	prosaposin	Extracellular region	WT+FUT8 KO	6	NNATQEEILR	13	Fucosylated	NNATQEEILR-N4H5F3S0G0	N4H5F3S0G0
FUT8 KO	prosaposin	Extracellular region	WT+FUT8 KO	6	TNVTFVQGLVEHVK	31	Core-fucosylated	TNVTFVQGLVEHVK-N2H5F1S0G0	N2H5F1S0G0
FUT8 KO	prosaposin	Extracellular region	WT+FUT8 KO	6	TNVTFVQGLVEHVK	31	Fucosylated	TNVTFVQGLVEHVK-N2H5F1S0G0	N2H5F1S0G0
FUT8 KO	prosaposin	Extracellular region	WT+FUT8 KO	6	TNVTFVQGLVEHVK	31	Core-fucosylated	TNVTFVQGLVEHVK-N4H3F1S0G0	N4H3F1S0G0
FUT8 KO	prosaposin	Extracellular region	WT+FUT8 KO	6	TNVTFVQGLVEHVK	31	Fucosylated	TNVTFVQGLVEHVK-N4H3F1S0G0	N4H3F1S0G0
FUT8 KO	prosaposin	Extracellular region	WT+FUT8 KO	6	TNVTFVQGLVEHVK	31	Core-fucosylated	TNVTFVQGLVEHVK-N4H4F1S0G0	N4H4F1S0G0
FUT8 KO	prosaposin	Extracellular region	WT+FUT8 KO	6	TNVTFVQGLVEHVK	31	Fucosylated	TNVTFVQGLVEHVK-N4H4F1S0G0	N4H4F1S0G0
FUT8 KO	prosaposin	Extracellular region	WT+FUT8 KO	6	TNVTFVQGLVEHVK	31	Core-fucosylated	TNVTFVQGLVEHVK-N4H5F3S0G0	N4H5F3S0G0
FUT8 KO	prosaposin	Extracellular region	WT+FUT8 KO	6	TNVTFVQGLVEHVK	31	Fucosylated	TNVTFVQGLVEHVK-N4H5F3S0G0	N4H5F3S0G0
FUT8 KO	prostaglandin F2 receptor negative regulator	Membrane	WT+FUT8 KO	2	DLDLSCNITTDR	9	Core-fucosylated	DLDLSCNITTDR-N4H5F3S0G0	N4H5F3S0G0
FUT8 KO	prostaglandin F2 receptor negative regulator	Membrane	WT+FUT8 KO	2	DLDLSCNITTDR	9	Fucosylated	DLDLSCNITTDR-N4H5F3S0G0	N4H5F3S0G0
FUT8 KO	protein FAM234A	Membrane	WT+FUT8 KO	3	LDYNSAVPYHFLAMGDVNR	10	Core-fucosylated	LDYNSAVPYHFLAMGDVNR-N6H7F3S0G0	N6H7F3S0G0
FUT8 KO	protein FAM234A	Membrane	WT+FUT8 KO	3	LDYNSAVPYHFLAMGDVNR	10	Fucosylated	LDYNSAVPYHFLAMGDVNR-N6H7F3S0G0	N6H7F3S0G0
FUT8 KO	protein sidekick-2	Membrane	WT+FUT8 KO	2	LNATTANTATVEVLAPSAR	6	Core-fucosylated	LNATTANTATVEVLAPSAR-N4H5F3S0G0	N4H5F3S0G0
FUT8 KO	protein sidekick-2	Membrane	WT+FUT8 KO	2	LNATTANTATVEVLAPSAR	6	Fucosylated	LNATTANTATVEVLAPSAR-N4H5F3S0G0	N4H5F3S0G0
FUT8 KO	protocadherin-7	Membrane	WT+FUT8 KO	1	NISYTLLPPSSNVR	2	Core-fucosylated	NISYTLLPPSSNVR-N4H5F1S0G0	N4H5F1S0G0
FUT8 KO	protocadherin-7	Membrane	WT+FUT8 KO	1	NISYTLLPPSSNVR	2	Fucosylated	NISYTLLPPSSNVR-N4H5F1S0G0	N4H5F1S0G0
FUT8 KO	reticulocalbin-1-like	Membrane	WT+FUT8 KO	2	VVRPDSELGERPPEDNQSFQYDHEAFLGK	15	Core-fucosylated	VVRPDSELGERPPEDNQSFQYDHEAFLGK-N2H3F1S0G0	N2H3F1S0G0
FUT8 KO	reticulocalbin-1-like	Membrane	WT+FUT8 KO	2	VVRPDSELGERPPEDNQSFQYDHEAFLGK	15	Fucosylated	VVRPDSELGERPPEDNQSFQYDHEAFLGK-N2H3F1S0G0	N2H3F1S0G0
FUT8 KO	sialidase-1-like	Membrane	WT+FUT8 KO	2	WSFSNGTSWQK	4	Core-fucosylated	WSFSNGTSWQK-N4H5F3S0G0	N4H5F3S0G0
FUT8 KO	sialidase-1-like	Membrane	WT+FUT8 KO	2	WSFSNGTSWQK	4	Fucosylated	WSFSNGTSWQK-N4H5F3S0G0	N4H5F3S0G0
FUT8 KO	sodium/potassium-transporting ATPase subunit beta-3	Membrane	WT+FUT8 KO	3	FLEPYSLEEQKNLTNCPDGAPFK	46	Core-fucosylated	FLEPYSLEEQKNLTNCPDGAPFK-N7H8F3S0G0	N7H8F3S0G0
FUT8 KO	sodium/potassium-transporting ATPase subunit beta-3	Membrane	WT+FUT8 KO	3	FLEPYSLEEQKNLTNCPDGAPFK	46	Fucosylated	FLEPYSLEEQKNLTNCPDGAPFK-N7H8F3S0G0	N7H8F3S0G0
FUT8 KO	synaptophysin-like protein 1	Membrane	WT+FUT8 KO	1	LNHAFFHPPPDVNVCDVK	19	Core-fucosylated	LNHAFFHPPPDVNVCDVK-N10H11F4S0G0	N10H11F4S0G0
FUT8 KO	synaptophysin-like protein 1	Membrane	WT+FUT8 KO	1	LNHAFFHPPPDVNVCDVK	19	Fucosylated	LNHAFFHPPPDVNVCDVK-N10H11F4S0G0	N10H11F4S0G0
FUT8 KO	synaptophysin-like protein 1	Membrane	WT+FUT8 KO	1	LNHAFFHPPPDVNVCDVK	19	Core-fucosylated	LNHAFFHPPPDVNVCDVK-N10H11F9S0G0	N10H11F9S0G0
FUT8 KO	synaptophysin-like protein 1	Membrane	WT+FUT8 KO	1	LNHAFFHPPPDVNVCDVK	19	Fucosylated	LNHAFFHPPPDVNVCDVK-N10H11F9S0G0	N10H11F9S0G0
FUT8 KO	thrombomodulin	Membrane	WT+FUT8 KO	2	GFQWVTGDNHTSYSR	9	Core-fucosylated	GFQWVTGDNHTSYSR-N4H5F3S0G0	N4H5F3S0G0
FUT8 KO	thrombomodulin	Membrane	WT+FUT8 KO	2	GFQWVTGDNHTSYSR	9	Fucosylated	GFQWVTGDNHTSYSR-N4H5F3S0G0	N4H5F3S0G0
FUT8 KO	thrombospondin type-1 domain-containing protein 7A	Membrane	WT+FUT8 KO	5	ANQTALCGGGIQTR	4	Core-fucosylated	ANQTALCGGGIQTR-N4H5F3S0G0	N4H5F3S0G0
FUT8 KO	thrombospondin type-1 domain-containing protein 7A	Membrane	WT+FUT8 KO	5	ANQTALCGGGIQTR	4	Fucosylated	ANQTALCGGGIQTR-N4H5F3S0G0	N4H5F3S0G0
FUT8 KO	transferrin receptor protein 1	Membrane	WT+FUT8 KO	3	DFEDLKYPVNGSLVIVR	8	Core-fucosylated	DFEDLKYPVNGSLVIVR-N5H6F3S0G0	N5H6F3S0G0
FUT8 KO	transferrin receptor protein 1	Membrane	WT+FUT8 KO	3	DFEDLKYPVNGSLVIVR	8	Fucosylated	DFEDLKYPVNGSLVIVR-N5H6F3S0G0	N5H6F3S0G0
FUT8 KO	trophoblast glycoprotein	Membrane	WT+FUT8 KO	3	VLHNSTLAEWQGLAHVK	21	Core-fucosylated	VLHNSTLAEWQGLAHVK-N5H6F3S0G0	N5H6F3S0G0
FUT8 KO	trophoblast glycoprotein	Membrane	WT+FUT8 KO	3	VLHNSTLAEWQGLAHVK	21	Fucosylated	VLHNSTLAEWQGLAHVK-N5H6F3S0G0	N5H6F3S0G0
FUT8 KO	tyrosine-protein kinase receptor UFO	Membrane	WT+FUT8 KO	1	LQAPGLNK	8	Core-fucosylated	LQAPGLNK-N4H5F3S0G0	N4H5F3S0G0
FUT8 KO	tyrosine-protein kinase receptor UFO	Membrane	WT+FUT8 KO	1	LQAPGLNK	8	Fucosylated	LQAPGLNK-N4H5F3S0G0	N4H5F3S0G0
FUT8 KO	tyrosine-protein phosphatase non-receptor type substrate 1	Membrane	WT+FUT8 KO	5	NHTVLILAQQK	20	Core-fucosylated	NHTVLILAQQK-N4H5F1S0G0	N4H5F1S0G0
FUT8 KO	tyrosine-protein phosphatase non-receptor type substrate 1	Membrane	WT+FUT8 KO	5	NHTVLILAQQK	20	Fucosylated	NHTVLILAQQK-N4H5F1S0G0	N4H5F1S0G0
FUT8 KO	tyrosine-protein phosphatase non-receptor type substrate 1	Membrane	WT+FUT8 KO	5	NHTVLILAQQK	20	Core-fucosylated	NHTVLILAQQK-N4H5F3S0G0	N4H5F3S0G0
FUT8 KO	tyrosine-protein phosphatase non-receptor type substrate 1	Membrane	WT+FUT8 KO	5	NHTVLILAQQK	20	Fucosylated	NHTVLILAQQK-N4H5F3S0G0	N4H5F3S0G0
FUT8 KO	tyrosine-protein phosphatase non-receptor type substrate 1	Membrane	WT+FUT8 KO	5	NHTVLILAQQK	20	Core-fucosylated	NHTVLILAQQK-N5H6F3S0G0	N5H6F3S0G0
FUT8 KO	tyrosine-protein phosphatase non-receptor type substrate 1	Membrane	WT+FUT8 KO	5	NHTVLILAQQK	20	Fucosylated	NHTVLILAQQK-N5H6F3S0G0	N5H6F3S0G0
FUT8 KO	urokinase plasminogen activator surface receptor	Membrane	WT+FUT8 KO	4	GPMDQCLEATGLDVLANR	22	Core-fucosylated	GPMDQCLEATGLDVLANR-N4H5F3S0G0	N4H5F3S0G0
FUT8 KO	urokinase plasminogen activator surface receptor	Membrane	WT+FUT8 KO	4	GPMDQCLEATGLDVLANR	22	Fucosylated	GPMDQCLEATGLDVLANR-N4H5F3S0G0	N4H5F3S0G0
FUT8 KO	urokinase plasminogen activator surface receptor	Membrane	WT+FUT8 KO	4	GPMDQCLEATGLDVLANR	22	Core-fucosylated	GPMDQCLEATGLDVLANR-N5H6F3S0G0	N5H6F3S0G0
FUT8 KO	urokinase plasminogen activator surface receptor	Membrane	WT+FUT8 KO	4	GPMDQCLEATGLDVLANR	22	Fucosylated	GPMDQCLEATGLDVLANR-N5H6F3S0G0	N5H6F3S0G0
FUT8 KO	zinc transporter ZIP10	Membrane	WT+FUT8 KO	1	DHNEDDRQHECLNVTQLLK	5	Core-fucosylated	DHNEDDRQHECLNVTQLLK-N4H5F1S0G0	N4H5F1S0G0
FUT8 KO	zinc transporter ZIP10	Membrane	WT+FUT8 KO	1	DHNEDDRQHECLNVTQLLK	5	Fucosylated	DHNEDDRQHECLNVTQLLK-N4H5F1S0G0	N4H5F1S0G0
FUT8 KO	2-oxoglutarate and iron-dependent oxygenase domain-containing protein 3	Membrane	WT+FUT8 KO	2	FVFMEEGSNR	3	High-mannosylated	FVFMEEGSNR-N2H6F0S0G0	N2H6F0S0G0
FUT8 KO	2-oxoglutarate and iron-dependent oxygenase domain-containing protein 3	Membrane	WT+FUT8 KO	2	FVFMEEGSNR	3	High-mannosylated	FVFMEEGSNR-N2H7F0S0G0	N2H7F0S0G0
FUT8 KO	2-oxoglutarate and iron-dependent oxygenase domain-containing protein 3	Membrane	WT+FUT8 KO	2	FVFMEEGSNR	3	High-mannosylated	FVFMEEGSNR-N2H8F0S0G0	N2H8F0S0G0
FUT8 KO	2-oxoglutarate and iron-dependent oxygenase domain-containing protein 3	Membrane	WT+FUT8 KO	2	INSTEAQTAHDEYWHAHVDK	9	High-mannosylated	INSTEAQTAHDEYWHAHVDK-N2H10F0S0G0	N2H10F0S0G0
FUT8 KO	2-oxoglutarate and iron-dependent oxygenase domain-containing protein 3	Membrane	WT+FUT8 KO	2	INSTEAQTAHDEYWHAHVDK	9	High-mannosylated	INSTEAQTAHDEYWHAHVDK-N2H3F0S0G0	N2H3F0S0G0
FUT8 KO	2-oxoglutarate and iron-dependent oxygenase domain-containing protein 3	Membrane	WT+FUT8 KO	2	INSTEAQTAHDEYWHAHVDK	9	High-mannosylated	INSTEAQTAHDEYWHAHVDK-N2H4F0S0G0	N2H4F0S0G0
FUT8 KO	2-oxoglutarate and iron-dependent oxygenase domain-containing protein 3	Membrane	WT+FUT8 KO	2	INSTEAQTAHDEYWHAHVDK	9	High-mannosylated	INSTEAQTAHDEYWHAHVDK-N2H5F0S0G0	N2H5F0S0G0
FUT8 KO	2-oxoglutarate and iron-dependent oxygenase domain-containing protein 3	Membrane	WT+FUT8 KO	2	INSTEAQTAHDEYWHAHVDK	9	High-mannosylated	INSTEAQTAHDEYWHAHVDK-N2H6F0S0G0	N2H6F0S0G0
FUT8 KO	2-oxoglutarate and iron-dependent oxygenase domain-containing protein 3	Membrane	WT+FUT8 KO	2	INSTEAQTAHDEYWHAHVDK	9	High-mannosylated	INSTEAQTAHDEYWHAHVDK-N2H7F0S0G0	N2H7F0S0G0
FUT8 KO	2-oxoglutarate and iron-dependent oxygenase domain-containing protein 3	Membrane	WT+FUT8 KO	2	INSTEAQTAHDEYWHAHVDK	9	High-mannosylated	INSTEAQTAHDEYWHAHVDK-N2H8F0S0G0	N2H8F0S0G0
FUT8 KO	2-oxoglutarate and iron-dependent oxygenase domain-containing protein 3	Membrane	WT+FUT8 KO	2	INSTEAQTAHDEYWHAHVDK	9	High-mannosylated	INSTEAQTAHDEYWHAHVDK-N2H9F0S0G0	N2H9F0S0G0
FUT8 KO	2-oxoglutarate and iron-dependent oxygenase domain-containing protein 3	Membrane	WT+FUT8 KO	2	INSTEAQTAHDEYWHAHVDK	9	Complex/Hybrid	INSTEAQTAHDEYWHAHVDK-N3H3F0S0G0	N3H3F0S0G0
FUT8 KO	4F2 cell-surface antigen heavy chain	Membrane	WT+FUT8 KO	3	LEAANLPAGISLPASANLLFSTNSTR	15	High-mannosylated	LEAANLPAGISLPASANLLFSTNSTR-N2H5F0S0G0	N2H5F0S0G0
FUT8 KO	4F2 cell-surface antigen heavy chain	Membrane	WT+FUT8 KO	3	LEAANLPAGISLPASANLLFSTNSTR	15	High-mannosylated	LEAANLPAGISLPASANLLFSTNSTR-N2H9F0S0G0	N2H9F0S0G0
FUT8 KO	4F2 cell-surface antigen heavy chain	Membrane	WT+FUT8 KO	3	LEAANLPAGISLPASANLLFSTNSTR	15	Complex/Hybrid	LEAANLPAGISLPASANLLFSTNSTR-N4H5F0S0G0	N4H5F0S0G0
FUT8 KO	4F2 cell-surface antigen heavy chain	Membrane	WT+FUT8 KO	3	LEAANLPAGISLPASANLLFSTNSTR	15	Fucosylated	LEAANLPAGISLPASANLLFSTNSTR-N4H5F2S0G0	N4H5F2S0G0
FUT8 KO	4F2 cell-surface antigen heavy chain	Membrane	WT+FUT8 KO	3	LEAANLPAGISLPASANLLFSTNSTR	15	Sialylated	LEAANLPAGISLPASANLLFSTNSTR-N5H6F0S1G0	N5H6F0S1G0
FUT8 KO	4F2 cell-surface antigen heavy chain	Membrane	WT+FUT8 KO	3	LEAANLPAGISLPASANLLFSTNSTR	15	Fucosylated	LEAANLPAGISLPASANLLFSTNSTR-N5H6F4S0G0	N5H6F4S0G0
FUT8 KO	4F2 cell-surface antigen heavy chain	Membrane	WT+FUT8 KO	3	LEAANLPAGISLPASANLLFSTNSTR	15	Complex/Hybrid	LEAANLPAGISLPASANLLFSTNSTR-N6H5F0S0G0	N6H5F0S0G0
FUT8 KO	4F2 cell-surface antigen heavy chain	Membrane	WT+FUT8 KO	3	LEAANLPAGISLPASANLLFSTNSTR	15	Fucosylated	LEAANLPAGISLPASANLLFSTNSTR-N6H7F2S0G0	N6H7F2S0G0
FUT8 KO	4F2 cell-surface antigen heavy chain	Membrane	WT+FUT8 KO	3	LEAANLPAGISLPASANLLFSTNSTR	15	Fucosylated	LEAANLPAGISLPASANLLFSTNSTR-N6H7F4S0G0	N6H7F4S0G0
FUT8 KO	4F2 cell-surface antigen heavy chain	Membrane	WT+FUT8 KO	3	LEAANLPAGISLPASANLLFSTNSTR	15	Fucosylated	LEAANLPAGISLPASANLLFSTNSTR-N7H8F1S0G0	N7H8F1S0G0
FUT8 KO	4F2 cell-surface antigen heavy chain	Membrane	WT+FUT8 KO	3	LEAANLPAGISLPASANLLFSTNSTR	15	Fucosylated	LEAANLPAGISLPASANLLFSTNSTR-N8H9F1S0G0	N8H9F1S0G0
FUT8 KO	4F2 cell-surface antigen heavy chain	Membrane	WT+FUT8 KO	3	LMDASLYLAEWQNITK	19	Sialylated	LMDASLYLAEWQNITK-N4H5F0S1G0	N4H5F0S1G0
FUT8 KO	4F2 cell-surface antigen heavy chain	Membrane	WT+FUT8 KO	3	LMDASLYLAEWQNITK	19	Fucosylated	LMDASLYLAEWQNITK-N4H5F2S0G0	N4H5F2S0G0
FUT8 KO	4F2 cell-surface antigen heavy chain	Membrane	WT+FUT8 KO	3	LMDASLYLAEWQNITK	19	Fucosylated	LMDASLYLAEWQNITK-N4H5F3S0G0	N4H5F3S0G0
FUT8 KO	4F2 cell-surface antigen heavy chain	Membrane	WT+FUT8 KO	3	LMDASLYLAEWQNITK	19	Complex/Hybrid	LMDASLYLAEWQNITK-N5H6F0S0G0	N5H6F0S0G0
FUT8 KO	4F2 cell-surface antigen heavy chain	Membrane	WT+FUT8 KO	3	LMDASLYLAEWQNITK	19	Sialylated	LMDASLYLAEWQNITK-N5H6F0S1G0	N5H6F0S1G0
FUT8 KO	4F2 cell-surface antigen heavy chain	Membrane	WT+FUT8 KO	3	LMDASLYLAEWQNITK	19	Sialylated	LMDASLYLAEWQNITK-N5H6F0S2G0	N5H6F0S2G0
FUT8 KO	4F2 cell-surface antigen heavy chain	Membrane	WT+FUT8 KO	3	LMDASLYLAEWQNITK	19	Fucosylated	LMDASLYLAEWQNITK-N5H6F2S0G0	N5H6F2S0G0
FUT8 KO	4F2 cell-surface antigen heavy chain	Membrane	WT+FUT8 KO	3	LMDASLYLAEWQNITK	19	Fucosylated	LMDASLYLAEWQNITK-N5H6F3S0G0	N5H6F3S0G0
FUT8 KO	4F2 cell-surface antigen heavy chain	Membrane	WT+FUT8 KO	3	LMDASLYLAEWQNITK	19	Fucosylated	LMDASLYLAEWQNITK-N5H6F4S0G0	N5H6F4S0G0
FUT8 KO	4F2 cell-surface antigen heavy chain	Membrane	WT+FUT8 KO	3	LMDASLYLAEWQNITK	19	Complex/Hybrid	LMDASLYLAEWQNITK-N6H7F0S0G0	N6H7F0S0G0
FUT8 KO	4F2 cell-surface antigen heavy chain	Membrane	WT+FUT8 KO	3	LMDASLYLAEWQNITK	19	Fucosylated	LMDASLYLAEWQNITK-N6H7F4S0G0	N6H7F4S0G0
FUT8 KO	4F2 cell-surface antigen heavy chain	Membrane	WT+FUT8 KO	3	LMDASLYLAEWQNITK	19	Complex/Hybrid	LMDASLYLAEWQNITK-N7H8F0S0G0	N7H8F0S0G0
FUT8 KO	4F2 cell-surface antigen heavy chain	Membrane	WT+FUT8 KO	3	LMDASLYLAEWQNITK	19	Sialylated	LMDASLYLAEWQNITK-N7H8F0S1G0	N7H8F0S1G0
FUT8 KO	4F2 cell-surface antigen heavy chain	Membrane	WT+FUT8 KO	3	YLNATGSHWCSWSVSQAGLLTASVPAQLLR	8	Fucosylated	YLNATGSHWCSWSVSQAGLLTASVPAQLLR-N5H6F2S0G0	N5H6F2S0G0
FUT8 KO	4F2 cell-surface antigen heavy chain	Membrane	WT+FUT8 KO	3	YLNATGSHWCSWSVSQAGLLTASVPAQLLR	8	Fucosylated	YLNATGSHWCSWSVSQAGLLTASVPAQLLR-N5H6F4S0G0	N5H6F4S0G0
FUT8 KO	4F2 cell-surface antigen heavy chain	Membrane	WT+FUT8 KO	3	YLNATGSHWCSWSVSQAGLLTASVPAQLLR	8	Fucosylated	YLNATGSHWCSWSVSQAGLLTASVPAQLLR-N6H7F4S0G0	N6H7F4S0G0
FUT8 KO	4F2 cell-surface antigen heavy chain	Membrane	WT+FUT8 KO	3	YLNATGSHWCSWSVSQAGLLTASVPAQLLR	8	Complex/Hybrid	YLNATGSHWCSWSVSQAGLLTASVPAQLLR-N7H8F0S0G0	N7H8F0S0G0
FUT8 KO	4F2 cell-surface antigen heavy chain	Membrane	WT+FUT8 KO	3	YLNATGSHWCSWSVSQAGLLTASVPAQLLR	8	Fucosylated	YLNATGSHWCSWSVSQAGLLTASVPAQLLR-N7H8F1S0G0	N7H8F1S0G0
FUT8 KO	4F2 cell-surface antigen heavy chain	Membrane	WT+FUT8 KO	3	YLNATGSHWCSWSVSQAGLLTASVPAQLLR	8	Fucosylated	YLNATGSHWCSWSVSQAGLLTASVPAQLLR-N7H8F2S0G0	N7H8F2S0G0
FUT8 KO	4F2 cell-surface antigen heavy chain	Membrane	WT+FUT8 KO	3	YLNATGSHWCSWSVSQAGLLTASVPAQLLR	8	Fucosylated	YLNATGSHWCSWSVSQAGLLTASVPAQLLR-N8H9F2S0G0	N8H9F2S0G0
FUT8 KO	acid ceramidase	Lysosome	WT+FUT8 KO	3	LMAPAYFILGGNK	5	High-mannosylated	LMAPAYFILGGNK-N2H10F0S0G0	N2H10F0S0G0
FUT8 KO	acid ceramidase	Lysosome	WT+FUT8 KO	3	LMAPAYFILGGNK	5	High-mannosylated	LMAPAYFILGGNK-N2H6F0S0G0	N2H6F0S0G0
FUT8 KO	acid ceramidase	Lysosome	WT+FUT8 KO	3	LMAPAYFILGGNK	5	High-mannosylated	LMAPAYFILGGNK-N2H7F0S0G0	N2H7F0S0G0
FUT8 KO	acid ceramidase	Lysosome	WT+FUT8 KO	3	LMAPAYFILGGNK	5	High-mannosylated	LMAPAYFILGGNK-N2H8F0S0G0	N2H8F0S0G0
FUT8 KO	acid ceramidase	Lysosome	WT+FUT8 KO	3	LMAPAYFILGGNK	5	High-mannosylated	LMAPAYFILGGNK-N2H9F0S0G0	N2H9F0S0G0
FUT8 KO	acid ceramidase	Lysosome	WT+FUT8 KO	3	NLSFATIYDVLSTKPVLNK	4	Fucosylated	NLSFATIYDVLSTKPVLNK-N12H12F1S0G0	N12H12F1S0G0
FUT8 KO	acid ceramidase	Lysosome	WT+FUT8 KO	3	NLSFATIYDVLSTKPVLNK	4	High-mannosylated	NLSFATIYDVLSTKPVLNK-N2H6F0S0G0	N2H6F0S0G0
FUT8 KO	acid ceramidase	Lysosome	WT+FUT8 KO	3	NLSFATIYDVLSTKPVLNK	4	High-mannosylated	NLSFATIYDVLSTKPVLNK-N2H7F0S0G0	N2H7F0S0G0
FUT8 KO	acid ceramidase	Lysosome	WT+FUT8 KO	3	NLSFATIYDVLSTKPVLNK	4	High-mannosylated	NLSFATIYDVLSTKPVLNK-N2H8F0S0G0	N2H8F0S0G0
FUT8 KO	acid ceramidase	Lysosome	WT+FUT8 KO	3	SVLENSTSYDEAK	12	High-mannosylated	SVLENSTSYDEAK-N2H10F0S0G0	N2H10F0S0G0
FUT8 KO	acid ceramidase	Lysosome	WT+FUT8 KO	3	SVLENSTSYDEAK	12	High-mannosylated	SVLENSTSYDEAK-N2H3F0S0G0	N2H3F0S0G0
FUT8 KO	acid ceramidase	Lysosome	WT+FUT8 KO	3	SVLENSTSYDEAK	12	Fucosylated	SVLENSTSYDEAK-N2H3F1S0G0	N2H3F1S0G0
FUT8 KO	acid ceramidase	Lysosome	WT+FUT8 KO	3	SVLENSTSYDEAK	12	High-mannosylated	SVLENSTSYDEAK-N2H4F0S0G0	N2H4F0S0G0
FUT8 KO	acid ceramidase	Lysosome	WT+FUT8 KO	3	SVLENSTSYDEAK	12	Fucosylated	SVLENSTSYDEAK-N2H4F1S0G0	N2H4F1S0G0
FUT8 KO	acid ceramidase	Lysosome	WT+FUT8 KO	3	SVLENSTSYDEAK	12	High-mannosylated	SVLENSTSYDEAK-N2H5F0S0G0	N2H5F0S0G0
FUT8 KO	acid ceramidase	Lysosome	WT+FUT8 KO	3	SVLENSTSYDEAK	12	High-mannosylated	SVLENSTSYDEAK-N2H6F0S0G0	N2H6F0S0G0
FUT8 KO	acid ceramidase	Lysosome	WT+FUT8 KO	3	SVLENSTSYDEAK	12	High-mannosylated	SVLENSTSYDEAK-N2H7F0S0G0	N2H7F0S0G0
FUT8 KO	acid ceramidase	Lysosome	WT+FUT8 KO	3	SVLENSTSYDEAK	12	High-mannosylated	SVLENSTSYDEAK-N2H8F0S0G0	N2H8F0S0G0
FUT8 KO	acid ceramidase	Lysosome	WT+FUT8 KO	3	SVLENSTSYDEAK	12	High-mannosylated	SVLENSTSYDEAK-N2H9F0S0G0	N2H9F0S0G0
FUT8 KO	acid ceramidase	Lysosome	WT+FUT8 KO	3	SVLENSTSYDEAK	12	Complex/Hybrid	SVLENSTSYDEAK-N3H3F0S0G0	N3H3F0S0G0
FUT8 KO	acid ceramidase	Lysosome	WT+FUT8 KO	3	SVLENSTSYDEAK	12	Complex/Hybrid	SVLENSTSYDEAK-N4H5F0S0G0	N4H5F0S0G0
FUT8 KO	ADAMTS-like protein 4	Extracellular region	WT+FUT8 KO	2	DVQCLSANQTLSTR	2	High-mannosylated	DVQCLSANQTLSTR-N2H7F0S0G0	N2H7F0S0G0
FUT8 KO	ADAMTS-like protein 4	Extracellular region	WT+FUT8 KO	2	DVQCLSANQTLSTR	2	High-mannosylated	DVQCLSANQTLSTR-N2H9F0S0G0	N2H9F0S0G0
FUT8 KO	ADAMTS-like protein 4	Extracellular region	WT+FUT8 KO	2	RPDGCGVCGGDGSTCHLVSGNLTDR	3	High-mannosylated	RPDGCGVCGGDGSTCHLVSGNLTDR-N2H6F0S0G0	N2H6F0S0G0
FUT8 KO	ADAMTS-like protein 4	Extracellular region	WT+FUT8 KO	2	RPDGCGVCGGDGSTCHLVSGNLTDR	3	High-mannosylated	RPDGCGVCGGDGSTCHLVSGNLTDR-N2H8F0S0G0	N2H8F0S0G0
FUT8 KO	ADAMTS-like protein 4	Extracellular region	WT+FUT8 KO	2	RPDGCGVCGGDGSTCHLVSGNLTDR	3	High-mannosylated	RPDGCGVCGGDGSTCHLVSGNLTDR-N2H9F0S0G0	N2H9F0S0G0
FUT8 KO	adhesion G protein-coupled receptor A2	Membrane	WT+FUT8 KO	1	GVATPVIFAGTSGCGVGNLTEPVAVSLR	5	High-mannosylated	GVATPVIFAGTSGCGVGNLTEPVAVSLR-N2H8F0S0G0	N2H8F0S0G0
FUT8 KO	adhesion G protein-coupled receptor A2	Membrane	WT+FUT8 KO	1	GVATPVIFAGTSGCGVGNLTEPVAVSLR	5	High-mannosylated	GVATPVIFAGTSGCGVGNLTEPVAVSLR-N2H9F0S0G0	N2H9F0S0G0
FUT8 KO	adhesion G protein-coupled receptor A2	Membrane	WT+FUT8 KO	1	GVATPVIFAGTSGCGVGNLTEPVAVSLR	5	Complex/Hybrid	GVATPVIFAGTSGCGVGNLTEPVAVSLR-N6H5F0S0G0	N6H5F0S0G0
FUT8 KO	adhesion G protein-coupled receptor A2	Membrane	WT+FUT8 KO	1	GVATPVIFAGTSGCGVGNLTEPVAVSLR	5	Fucosylated	GVATPVIFAGTSGCGVGNLTEPVAVSLR-N7H8F1S0G0	N7H8F1S0G0
FUT8 KO	adipocyte plasma membrane-associated protein	Membrane	WT+FUT8 KO	1	AGPNGTLFVVDAYK	6	High-mannosylated	AGPNGTLFVVDAYK-N2H4F0S0G0	N2H4F0S0G0
FUT8 KO	adipocyte plasma membrane-associated protein	Membrane	WT+FUT8 KO	1	AGPNGTLFVVDAYK	6	High-mannosylated	AGPNGTLFVVDAYK-N2H5F0S0G0	N2H5F0S0G0
FUT8 KO	adipocyte plasma membrane-associated protein	Membrane	WT+FUT8 KO	1	AGPNGTLFVVDAYK	6	High-mannosylated	AGPNGTLFVVDAYK-N2H6F0S0G0	N2H6F0S0G0
FUT8 KO	adipocyte plasma membrane-associated protein	Membrane	WT+FUT8 KO	1	AGPNGTLFVVDAYK	6	High-mannosylated	AGPNGTLFVVDAYK-N2H7F0S0G0	N2H7F0S0G0
FUT8 KO	adipocyte plasma membrane-associated protein	Membrane	WT+FUT8 KO	1	AGPNGTLFVVDAYK	6	High-mannosylated	AGPNGTLFVVDAYK-N2H8F0S0G0	N2H8F0S0G0
FUT8 KO	adipocyte plasma membrane-associated protein	Membrane	WT+FUT8 KO	1	AGPNGTLFVVDAYK	6	High-mannosylated	AGPNGTLFVVDAYK-N2H9F0S0G0	N2H9F0S0G0
FUT8 KO	all-trans retinoic acid-induced differentiation factor	Membrane	WT+FUT8 KO	4	DLCNSTGSPEVCPENGSCAPEGPGLLQCVCADGFHGYK	2	High-mannosylated	DLCNSTGSPEVCPENGSCAPEGPGLLQCVCADGFHGYK-N2H5F0S0G0	N2H5F0S0G0
FUT8 KO	all-trans retinoic acid-induced differentiation factor	Membrane	WT+FUT8 KO	4	DLCNSTGSPEVCPENGSCAPEGPGLLQCVCADGFHGYK	2	High-mannosylated	DLCNSTGSPEVCPENGSCAPEGPGLLQCVCADGFHGYK-N2H6F0S0G0	N2H6F0S0G0
FUT8 KO	all-trans retinoic acid-induced differentiation factor	Membrane	WT+FUT8 KO	4	GTILGLDLQNCSLKDPGPK	4	High-mannosylated	GTILGLDLQNCSLKDPGPK-N2H6F0S0G0	N2H6F0S0G0
FUT8 KO	all-trans retinoic acid-induced differentiation factor	Membrane	WT+FUT8 KO	4	GTILGLDLQNCSLKDPGPK	4	High-mannosylated	GTILGLDLQNCSLKDPGPK-N2H7F0S0G0	N2H7F0S0G0
FUT8 KO	all-trans retinoic acid-induced differentiation factor	Membrane	WT+FUT8 KO	4	GTILGLDLQNCSLKDPGPK	4	High-mannosylated	GTILGLDLQNCSLKDPGPK-N2H8F0S0G0	N2H8F0S0G0
FUT8 KO	all-trans retinoic acid-induced differentiation factor	Membrane	WT+FUT8 KO	4	GTILGLDLQNCSLKDPGPK	4	High-mannosylated	GTILGLDLQNCSLKDPGPK-N2H9F0S0G0	N2H9F0S0G0
FUT8 KO	all-trans retinoic acid-induced differentiation factor	Membrane	WT+FUT8 KO	4	GTILGLDLQNCSLK	4	High-mannosylated	GTILGLDLQNCSLK-N2H6F0S0G0	N2H6F0S0G0
FUT8 KO	all-trans retinoic acid-induced differentiation factor	Membrane	WT+FUT8 KO	4	GTILGLDLQNCSLK	4	High-mannosylated	GTILGLDLQNCSLK-N2H7F0S0G0	N2H7F0S0G0
FUT8 KO	all-trans retinoic acid-induced differentiation factor	Membrane	WT+FUT8 KO	4	GTILGLDLQNCSLK	4	High-mannosylated	GTILGLDLQNCSLK-N2H8F0S0G0	N2H8F0S0G0
FUT8 KO	all-trans retinoic acid-induced differentiation factor	Membrane	WT+FUT8 KO	4	GTILGLDLQNCSLK	4	High-mannosylated	GTILGLDLQNCSLK-N2H9F0S0G0	N2H9F0S0G0
FUT8 KO	all-trans retinoic acid-induced differentiation factor	Membrane	WT+FUT8 KO	4	VAVYCENASAAIMQAR	16	High-mannosylated	VAVYCENASAAIMQAR-N2H10F0S0G0	N2H10F0S0G0
FUT8 KO	all-trans retinoic acid-induced differentiation factor	Membrane	WT+FUT8 KO	4	VAVYCENASAAIMQAR	16	High-mannosylated	VAVYCENASAAIMQAR-N2H3F0S0G0	N2H3F0S0G0
FUT8 KO	all-trans retinoic acid-induced differentiation factor	Membrane	WT+FUT8 KO	4	VAVYCENASAAIMQAR	16	High-mannosylated	VAVYCENASAAIMQAR-N2H4F0S0G0	N2H4F0S0G0
FUT8 KO	all-trans retinoic acid-induced differentiation factor	Membrane	WT+FUT8 KO	4	VAVYCENASAAIMQAR	16	Fucosylated	VAVYCENASAAIMQAR-N2H4F1S0G0	N2H4F1S0G0
FUT8 KO	all-trans retinoic acid-induced differentiation factor	Membrane	WT+FUT8 KO	4	VAVYCENASAAIMQAR	16	High-mannosylated	VAVYCENASAAIMQAR-N2H5F0S0G0	N2H5F0S0G0
FUT8 KO	all-trans retinoic acid-induced differentiation factor	Membrane	WT+FUT8 KO	4	VAVYCENASAAIMQAR	16	Fucosylated	VAVYCENASAAIMQAR-N2H5F1S0G0	N2H5F1S0G0
FUT8 KO	all-trans retinoic acid-induced differentiation factor	Membrane	WT+FUT8 KO	4	VAVYCENASAAIMQAR	16	High-mannosylated	VAVYCENASAAIMQAR-N2H6F0S0G0	N2H6F0S0G0
FUT8 KO	all-trans retinoic acid-induced differentiation factor	Membrane	WT+FUT8 KO	4	VAVYCENASAAIMQAR	16	High-mannosylated	VAVYCENASAAIMQAR-N2H7F0S0G0	N2H7F0S0G0
FUT8 KO	all-trans retinoic acid-induced differentiation factor	Membrane	WT+FUT8 KO	4	VAVYCENASAAIMQAR	16	High-mannosylated	VAVYCENASAAIMQAR-N2H8F0S0G0	N2H8F0S0G0
FUT8 KO	all-trans retinoic acid-induced differentiation factor	Membrane	WT+FUT8 KO	4	VAVYCENASAAIMQAR	16	High-mannosylated	VAVYCENASAAIMQAR-N2H9F0S0G0	N2H9F0S0G0
FUT8 KO	all-trans retinoic acid-induced differentiation factor	Membrane	WT+FUT8 KO	4	VAVYCENASAAIMQAR	16	Fucosylated	VAVYCENASAAIMQAR-N5H6F3S0G0	N5H6F3S0G0
FUT8 KO	all-trans retinoic acid-induced differentiation factor	Membrane	WT+FUT8 KO	4	VAVYCENASAAIMQAR	16	Fucosylated	VAVYCENASAAIMQAR-N5H6F4S0G0	N5H6F4S0G0
FUT8 KO	all-trans retinoic acid-induced differentiation factor	Membrane	WT+FUT8 KO	4	VAVYCENASAAIMQAR	16	Fucosylated	VAVYCENASAAIMQAR-N6H7F2S0G0	N6H7F2S0G0
FUT8 KO	all-trans retinoic acid-induced differentiation factor	Membrane	WT+FUT8 KO	4	VAVYCENASAAIMQAR	16	Fucosylated	VAVYCENASAAIMQAR-N6H7F4S0G0	N6H7F4S0G0
FUT8 KO	alpha-(1,3)-fucosyltransferase 11	Membrane	WT+FUT8 KO	2	DWMPNNHSIILIDDFESPQK	3	High-mannosylated	DWMPNNHSIILIDDFESPQK-N2H5F0S0G0	N2H5F0S0G0
FUT8 KO	alpha-(1,3)-fucosyltransferase 11	Membrane	WT+FUT8 KO	2	DWMPNNHSIILIDDFESPQK	3	High-mannosylated	DWMPNNHSIILIDDFESPQK-N2H6F0S0G0	N2H6F0S0G0
FUT8 KO	alpha-(1,3)-fucosyltransferase 11	Membrane	WT+FUT8 KO	2	DWMPNNHSIILIDDFESPQK	3	High-mannosylated	DWMPNNHSIILIDDFESPQK-N2H8F0S0G0	N2H8F0S0G0
FUT8 KO	alpha-(1,3)-fucosyltransferase 11	Membrane	WT+FUT8 KO	2	LFNLTATFSR	3	High-mannosylated	LFNLTATFSR-N2H7F0S0G0	N2H7F0S0G0
FUT8 KO	alpha-(1,3)-fucosyltransferase 11	Membrane	WT+FUT8 KO	2	LFNLTATFSR	3	High-mannosylated	LFNLTATFSR-N2H8F0S0G0	N2H8F0S0G0
FUT8 KO	alpha-(1,3)-fucosyltransferase 11	Membrane	WT+FUT8 KO	2	LFNLTATFSR	3	High-mannosylated	LFNLTATFSR-N2H9F0S0G0	N2H9F0S0G0
FUT8 KO	alpha-1,2-mannosyltransferase ALG9	Membrane	WT+FUT8 KO	1	IATDPTIHTVPEGRPVNVCVGK	2	High-mannosylated	IATDPTIHTVPEGRPVNVCVGK-N2H8F0S0G0	N2H8F0S0G0
FUT8 KO	alpha-1,2-mannosyltransferase ALG9	Membrane	WT+FUT8 KO	1	IATDPTIHTVPEGRPVNVCVGK	2	High-mannosylated	IATDPTIHTVPEGRPVNVCVGK-N2H9F0S0G0	N2H9F0S0G0
FUT8 KO	alpha-2-macroglobulin receptor-associated protein	Endoplasmic reticulum	WT+FUT8 KO	2	KDTQMVHSNSLNEDTQDELGDPR	1	Fucosylated	KDTQMVHSNSLNEDTQDELGDPR-N4H3F1S0G0	N4H3F1S0G0
FUT8 KO	alpha-2-macroglobulin receptor-associated protein	Endoplasmic reticulum	WT+FUT8 KO	2	VIDLWDLAQTANFTEK	17	High-mannosylated	VIDLWDLAQTANFTEK-N2H3F0S0G0	N2H3F0S0G0
FUT8 KO	alpha-2-macroglobulin receptor-associated protein	Endoplasmic reticulum	WT+FUT8 KO	2	VIDLWDLAQTANFTEK	17	Fucosylated	VIDLWDLAQTANFTEK-N2H3F1S0G0	N2H3F1S0G0
FUT8 KO	alpha-2-macroglobulin receptor-associated protein	Endoplasmic reticulum	WT+FUT8 KO	2	VIDLWDLAQTANFTEK	17	High-mannosylated	VIDLWDLAQTANFTEK-N2H4F0S0G0	N2H4F0S0G0
FUT8 KO	alpha-2-macroglobulin receptor-associated protein	Endoplasmic reticulum	WT+FUT8 KO	2	VIDLWDLAQTANFTEK	17	High-mannosylated	VIDLWDLAQTANFTEK-N2H5F0S0G0	N2H5F0S0G0
FUT8 KO	alpha-2-macroglobulin receptor-associated protein	Endoplasmic reticulum	WT+FUT8 KO	2	VIDLWDLAQTANFTEK	17	Fucosylated	VIDLWDLAQTANFTEK-N2H5F1S0G0	N2H5F1S0G0
FUT8 KO	alpha-2-macroglobulin receptor-associated protein	Endoplasmic reticulum	WT+FUT8 KO	2	VIDLWDLAQTANFTEK	17	High-mannosylated	VIDLWDLAQTANFTEK-N2H6F0S0G0	N2H6F0S0G0
FUT8 KO	alpha-2-macroglobulin receptor-associated protein	Endoplasmic reticulum	WT+FUT8 KO	2	VIDLWDLAQTANFTEK	17	High-mannosylated	VIDLWDLAQTANFTEK-N2H7F0S0G0	N2H7F0S0G0
FUT8 KO	alpha-2-macroglobulin receptor-associated protein	Endoplasmic reticulum	WT+FUT8 KO	2	VIDLWDLAQTANFTEK	17	High-mannosylated	VIDLWDLAQTANFTEK-N2H8F0S0G0	N2H8F0S0G0
FUT8 KO	alpha-2-macroglobulin receptor-associated protein	Endoplasmic reticulum	WT+FUT8 KO	2	VIDLWDLAQTANFTEK	17	High-mannosylated	VIDLWDLAQTANFTEK-N2H9F0S0G0	N2H9F0S0G0
FUT8 KO	alpha-2-macroglobulin receptor-associated protein	Endoplasmic reticulum	WT+FUT8 KO	2	VIDLWDLAQTANFTEK	17	Complex/Hybrid	VIDLWDLAQTANFTEK-N3H3F0S0G0	N3H3F0S0G0
FUT8 KO	alpha-2-macroglobulin receptor-associated protein	Endoplasmic reticulum	WT+FUT8 KO	2	VIDLWDLAQTANFTEK	17	Fucosylated	VIDLWDLAQTANFTEK-N4H3F1S0G0	N4H3F1S0G0
FUT8 KO	alpha-2-macroglobulin receptor-associated protein	Endoplasmic reticulum	WT+FUT8 KO	2	VIDLWDLAQTANFTEK	17	Fucosylated	VIDLWDLAQTANFTEK-N4H4F1S0G0	N4H4F1S0G0
FUT8 KO	alpha-2-macroglobulin receptor-associated protein	Endoplasmic reticulum	WT+FUT8 KO	2	VIDLWDLAQTANFTEK	17	Complex/Hybrid	VIDLWDLAQTANFTEK-N4H5F0S0G0	N4H5F0S0G0
FUT8 KO	alpha-2-macroglobulin receptor-associated protein	Endoplasmic reticulum	WT+FUT8 KO	2	VIDLWDLAQTANFTEK	17	Complex/Hybrid	VIDLWDLAQTANFTEK-N4H6F0S0G0	N4H6F0S0G0
FUT8 KO	alpha-2-macroglobulin receptor-associated protein	Endoplasmic reticulum	WT+FUT8 KO	2	VIDLWDLAQTANFTEK	17	Fucosylated	VIDLWDLAQTANFTEK-N5H3F1S0G0	N5H3F1S0G0
FUT8 KO	alpha-2-macroglobulin receptor-associated protein	Endoplasmic reticulum	WT+FUT8 KO	2	VIDLWDLAQTANFTEK	17	Complex/Hybrid	VIDLWDLAQTANFTEK-N5H4F0S0G0	N5H4F0S0G0
FUT8 KO	alpha-2-macroglobulin receptor-associated protein	Endoplasmic reticulum	WT+FUT8 KO	2	VIDLWDLAQTANFTEK	17	Complex/Hybrid	VIDLWDLAQTANFTEK-N5H5F0S0G0	N5H5F0S0G0
FUT8 KO	alpha-galactosidase A	Extracellular region	WT+FUT8 KO	1	LGIYADVGNK	19	High-mannosylated	LGIYADVGNK-N2H8F0S0G0	N2H8F0S0G0
FUT8 KO	alpha-galactosidase A	Extracellular region	WT+FUT8 KO	1	LGIYADVGNK	19	High-mannosylated	LGIYADVGNK-N2H9F0S0G0	N2H9F0S0G0
FUT8 KO	alpha-galactosidase A	Extracellular region	WT+FUT8 KO	1	LGIYADVGNK	19	Sialylated	LGIYADVGNK-N4H5F0S1G0	N4H5F0S1G0
FUT8 KO	alpha-galactosidase A	Extracellular region	WT+FUT8 KO	1	LGIYADVGNK	19	Sialylated	LGIYADVGNK-N4H5F0S2G0	N4H5F0S2G0
FUT8 KO	alpha-galactosidase A	Extracellular region	WT+FUT8 KO	1	LGIYADVGNK	19	Fucosylated	LGIYADVGNK-N4H5F2S0G0	N4H5F2S0G0
FUT8 KO	alpha-galactosidase A	Extracellular region	WT+FUT8 KO	1	LGIYADVGNK	19	Fucosylated	LGIYADVGNK-N4H5F3S0G0	N4H5F3S0G0
FUT8 KO	alpha-galactosidase A	Extracellular region	WT+FUT8 KO	1	LGIYADVGNK	19	Sialylated	LGIYADVGNK-N5H6F0S1G0	N5H6F0S1G0
FUT8 KO	alpha-galactosidase A	Extracellular region	WT+FUT8 KO	1	LGIYADVGNK	19	Fucosylated	LGIYADVGNK-N5H6F4S0G0	N5H6F4S0G0
FUT8 KO	alpha-galactosidase A	Extracellular region	WT+FUT8 KO	1	LGIYADVGNK	19	Complex/Hybrid	LGIYADVGNK-N6H5F0S0G0	N6H5F0S0G0
FUT8 KO	alpha-galactosidase A	Extracellular region	WT+FUT8 KO	1	LGIYADVGNK	19	Sialylated	LGIYADVGNK-N7H8F0S1G0	N7H8F0S1G0
FUT8 KO	alpha-L-iduronidase	Lysosome	WT+FUT8 KO	2	FQVNNTCPPHVQLLR	7	High-mannosylated	FQVNNTCPPHVQLLR-N2H10F0S0G0	N2H10F0S0G0
FUT8 KO	alpha-L-iduronidase	Lysosome	WT+FUT8 KO	2	FQVNNTCPPHVQLLR	7	High-mannosylated	FQVNNTCPPHVQLLR-N2H5F0S0G0	N2H5F0S0G0
FUT8 KO	alpha-L-iduronidase	Lysosome	WT+FUT8 KO	2	FQVNNTCPPHVQLLR	7	High-mannosylated	FQVNNTCPPHVQLLR-N2H6F0S0G0	N2H6F0S0G0
FUT8 KO	alpha-L-iduronidase	Lysosome	WT+FUT8 KO	2	FQVNNTCPPHVQLLR	7	High-mannosylated	FQVNNTCPPHVQLLR-N2H7F0S0G0	N2H7F0S0G0
FUT8 KO	alpha-L-iduronidase	Lysosome	WT+FUT8 KO	2	FQVNNTCPPHVQLLR	7	High-mannosylated	FQVNNTCPPHVQLLR-N2H8F0S0G0	N2H8F0S0G0
FUT8 KO	alpha-L-iduronidase	Lysosome	WT+FUT8 KO	2	FQVNNTCPPHVQLLR	7	High-mannosylated	FQVNNTCPPHVQLLR-N2H9F0S0G0	N2H9F0S0G0
FUT8 KO	alpha-L-iduronidase	Lysosome	WT+FUT8 KO	2	FQVNNTCPPHVQLLR	7	Complex/Hybrid	FQVNNTCPPHVQLLR-N6H5F0S0G0	N6H5F0S0G0
FUT8 KO	alpha-L-iduronidase	Lysosome	WT+FUT8 KO	2	HCANGTNFFTGEVGVR	8	High-mannosylated	HCANGTNFFTGEVGVR-N2H10F0S0G0	N2H10F0S0G0
FUT8 KO	alpha-L-iduronidase	Lysosome	WT+FUT8 KO	2	HCANGTNFFTGEVGVR	8	High-mannosylated	HCANGTNFFTGEVGVR-N2H4F0S0G0	N2H4F0S0G0
FUT8 KO	alpha-L-iduronidase	Lysosome	WT+FUT8 KO	2	HCANGTNFFTGEVGVR	8	High-mannosylated	HCANGTNFFTGEVGVR-N2H6F0S0G0	N2H6F0S0G0
FUT8 KO	alpha-L-iduronidase	Lysosome	WT+FUT8 KO	2	HCANGTNFFTGEVGVR	8	High-mannosylated	HCANGTNFFTGEVGVR-N2H7F0S0G0	N2H7F0S0G0
FUT8 KO	alpha-L-iduronidase	Lysosome	WT+FUT8 KO	2	HCANGTNFFTGEVGVR	8	High-mannosylated	HCANGTNFFTGEVGVR-N2H8F0S0G0	N2H8F0S0G0
FUT8 KO	alpha-L-iduronidase	Lysosome	WT+FUT8 KO	2	HCANGTNFFTGEVGVR	8	High-mannosylated	HCANGTNFFTGEVGVR-N2H9F0S0G0	N2H9F0S0G0
FUT8 KO	alpha-L-iduronidase	Lysosome	WT+FUT8 KO	2	HCANGTNFFTGEVGVR	8	Complex/Hybrid	HCANGTNFFTGEVGVR-N6H5F0S0G0	N6H5F0S0G0
FUT8 KO	alpha-mannosidase 2	Cytoplasm	WT+FUT8 KO	3	DSVINLSESVEDGPK	6	High-mannosylated	DSVINLSESVEDGPK-N2H10F0S0G0	N2H10F0S0G0
FUT8 KO	alpha-mannosidase 2	Cytoplasm	WT+FUT8 KO	3	DSVINLSESVEDGPK	6	High-mannosylated	DSVINLSESVEDGPK-N2H7F0S0G0	N2H7F0S0G0
FUT8 KO	alpha-mannosidase 2	Cytoplasm	WT+FUT8 KO	3	DSVINLSESVEDGPK	6	High-mannosylated	DSVINLSESVEDGPK-N2H8F0S0G0	N2H8F0S0G0
FUT8 KO	alpha-mannosidase 2	Cytoplasm	WT+FUT8 KO	3	DSVINLSESVEDGPK	6	High-mannosylated	DSVINLSESVEDGPK-N2H9F0S0G0	N2H9F0S0G0
FUT8 KO	alpha-mannosidase 2	Cytoplasm	WT+FUT8 KO	3	DSVINLSESVEDGPK	6	Complex/Hybrid	DSVINLSESVEDGPK-N6H5F0S0G0	N6H5F0S0G0
FUT8 KO	alpha-mannosidase 2	Cytoplasm	WT+FUT8 KO	3	DSVINLSESVEDGPK	6	Sialylated	DSVINLSESVEDGPK-N7H8F0S1G0	N7H8F0S1G0
FUT8 KO	alpha-mannosidase 2	Cytoplasm	WT+FUT8 KO	3	FAVESLTPSSLSLMHSPPDAQNLSEVTLSPMEISTFR	4	Fucosylated	FAVESLTPSSLSLMHSPPDAQNLSEVTLSPMEISTFR-N6H6F1S0G0	N6H6F1S0G0
FUT8 KO	alpha-mannosidase 2	Cytoplasm	WT+FUT8 KO	3	FAVESLTPSSLSLMHSPPDAQNLSEVTLSPMEISTFR	4	Complex/Hybrid	FAVESLTPSSLSLMHSPPDAQNLSEVTLSPMEISTFR-N6H7F0S0G0	N6H7F0S0G0
FUT8 KO	alpha-mannosidase 2	Cytoplasm	WT+FUT8 KO	3	FAVESLTPSSLSLMHSPPDAQNLSEVTLSPMEISTFR	4	Sialylated	FAVESLTPSSLSLMHSPPDAQNLSEVTLSPMEISTFR-N7H8F0S1G0	N7H8F0S1G0
FUT8 KO	alpha-mannosidase 2	Cytoplasm	WT+FUT8 KO	3	GSPGNGSQGSAHLLSPQSALQADPK	12	High-mannosylated	GSPGNGSQGSAHLLSPQSALQADPK-N2H10F0S0G0	N2H10F0S0G0
FUT8 KO	alpha-mannosidase 2	Cytoplasm	WT+FUT8 KO	3	GSPGNGSQGSAHLLSPQSALQADPK	12	High-mannosylated	GSPGNGSQGSAHLLSPQSALQADPK-N2H8F0S0G0	N2H8F0S0G0
FUT8 KO	alpha-mannosidase 2	Cytoplasm	WT+FUT8 KO	3	GSPGNGSQGSAHLLSPQSALQADPK	12	High-mannosylated	GSPGNGSQGSAHLLSPQSALQADPK-N2H9F0S0G0	N2H9F0S0G0
FUT8 KO	alpha-mannosidase 2	Cytoplasm	WT+FUT8 KO	3	GSPGNGSQGSAHLLSPQSALQADPK	12	Fucosylated	GSPGNGSQGSAHLLSPQSALQADPK-N4H5F3S0G0	N4H5F3S0G0
FUT8 KO	alpha-mannosidase 2	Cytoplasm	WT+FUT8 KO	3	GSPGNGSQGSAHLLSPQSALQADPK	12	Complex/Hybrid	GSPGNGSQGSAHLLSPQSALQADPK-N6H7F0S0G0	N6H7F0S0G0
FUT8 KO	alpha-mannosidase 2	Cytoplasm	WT+FUT8 KO	3	GSPGNGSQGSAHLLSPQSALQADPK	12	Sialylated	GSPGNGSQGSAHLLSPQSALQADPK-N6H7F0S1G0	N6H7F0S1G0
FUT8 KO	alpha-mannosidase 2	Cytoplasm	WT+FUT8 KO	3	GSPGNGSQGSAHLLSPQSALQADPK	12	Sialylated	GSPGNGSQGSAHLLSPQSALQADPK-N7H8F0S1G0	N7H8F0S1G0
FUT8 KO	alpha-mannosidase 2	Cytoplasm	WT+FUT8 KO	3	GSPGNGSQGSAHLLSPQSALQADPK	12	Fucosylated	GSPGNGSQGSAHLLSPQSALQADPK-N7H8F1S0G0	N7H8F1S0G0
FUT8 KO	alpha-mannosidase 2	Cytoplasm	WT+FUT8 KO	3	GSPGNGSQGSAHLLSPQSALQADPK	12	Fucosylated	GSPGNGSQGSAHLLSPQSALQADPK-N7H8F2S0G0	N7H8F2S0G0
FUT8 KO	alpha-N-acetylgalactosaminidase	Cytoplasm	WT+FUT8 KO	1	VNYTLIANICNLWR	6	High-mannosylated	VNYTLIANICNLWR-N2H10F0S0G0	N2H10F0S0G0
FUT8 KO	alpha-N-acetylgalactosaminidase	Cytoplasm	WT+FUT8 KO	1	VNYTLIANICNLWR	6	High-mannosylated	VNYTLIANICNLWR-N2H5F0S0G0	N2H5F0S0G0
FUT8 KO	alpha-N-acetylgalactosaminidase	Cytoplasm	WT+FUT8 KO	1	VNYTLIANICNLWR	6	High-mannosylated	VNYTLIANICNLWR-N2H6F0S0G0	N2H6F0S0G0
FUT8 KO	alpha-N-acetylgalactosaminidase	Cytoplasm	WT+FUT8 KO	1	VNYTLIANICNLWR	6	High-mannosylated	VNYTLIANICNLWR-N2H7F0S0G0	N2H7F0S0G0
FUT8 KO	alpha-N-acetylgalactosaminidase	Cytoplasm	WT+FUT8 KO	1	VNYTLIANICNLWR	6	High-mannosylated	VNYTLIANICNLWR-N2H9F0S0G0	N2H9F0S0G0
FUT8 KO	alpha-N-acetylgalactosaminidase	Cytoplasm	WT+FUT8 KO	1	VNYTLIANICNLWR	6	Complex/Hybrid	VNYTLIANICNLWR-N6H5F0S0G0	N6H5F0S0G0
FUT8 KO	alpha-N-acetylglucosaminidase	Lysosome	WT+FUT8 KO	1	LLLTAAPNLTTSK	7	High-mannosylated	LLLTAAPNLTTSK-N2H10F0S0G0	N2H10F0S0G0
FUT8 KO	alpha-N-acetylglucosaminidase	Lysosome	WT+FUT8 KO	1	LLLTAAPNLTTSK	7	High-mannosylated	LLLTAAPNLTTSK-N2H5F0S0G0	N2H5F0S0G0
FUT8 KO	alpha-N-acetylglucosaminidase	Lysosome	WT+FUT8 KO	1	LLLTAAPNLTTSK	7	High-mannosylated	LLLTAAPNLTTSK-N2H6F0S0G0	N2H6F0S0G0
FUT8 KO	alpha-N-acetylglucosaminidase	Lysosome	WT+FUT8 KO	1	LLLTAAPNLTTSK	7	High-mannosylated	LLLTAAPNLTTSK-N2H7F0S0G0	N2H7F0S0G0
FUT8 KO	alpha-N-acetylglucosaminidase	Lysosome	WT+FUT8 KO	1	LLLTAAPNLTTSK	7	High-mannosylated	LLLTAAPNLTTSK-N2H8F0S0G0	N2H8F0S0G0
FUT8 KO	alpha-N-acetylglucosaminidase	Lysosome	WT+FUT8 KO	1	LLLTAAPNLTTSK	7	High-mannosylated	LLLTAAPNLTTSK-N2H9F0S0G0	N2H9F0S0G0
FUT8 KO	alpha-N-acetylglucosaminidase	Lysosome	WT+FUT8 KO	1	LLLTAAPNLTTSK	7	Complex/Hybrid	LLLTAAPNLTTSK-N6H5F0S0G0	N6H5F0S0G0
FUT8 KO	amiloride-sensitive amine oxidase [copper-containing]	Membrane	WT+FUT8 KO	1	VDLDVAGTNNSFHTLHTR	5	High-mannosylated	VDLDVAGTNNSFHTLHTR-N2H6F0S0G0	N2H6F0S0G0
FUT8 KO	amiloride-sensitive amine oxidase [copper-containing]	Membrane	WT+FUT8 KO	1	VDLDVAGTNNSFHTLHTR	5	High-mannosylated	VDLDVAGTNNSFHTLHTR-N2H7F0S0G0	N2H7F0S0G0
FUT8 KO	amiloride-sensitive amine oxidase [copper-containing]	Membrane	WT+FUT8 KO	1	VDLDVAGTNNSFHTLHTR	5	High-mannosylated	VDLDVAGTNNSFHTLHTR-N2H8F0S0G0	N2H8F0S0G0
FUT8 KO	amiloride-sensitive amine oxidase [copper-containing]	Membrane	WT+FUT8 KO	1	VDLDVAGTNNSFHTLHTR	5	High-mannosylated	VDLDVAGTNNSFHTLHTR-N2H9F0S0G0	N2H9F0S0G0
FUT8 KO	amiloride-sensitive amine oxidase [copper-containing]	Membrane	WT+FUT8 KO	1	VDLDVAGTNNSFHTLHTR	5	Complex/Hybrid	VDLDVAGTNNSFHTLHTR-N6H5F0S0G0	N6H5F0S0G0
FUT8 KO	amyloid beta A4 protein	Membrane	WT+FUT8 KO	1	EQNYSDDVLANMISEPR	6	High-mannosylated	EQNYSDDVLANMISEPR-N2H10F0S0G0	N2H10F0S0G0
FUT8 KO	amyloid beta A4 protein	Membrane	WT+FUT8 KO	1	EQNYSDDVLANMISEPR	6	High-mannosylated	EQNYSDDVLANMISEPR-N2H5F0S0G0	N2H5F0S0G0
FUT8 KO	amyloid beta A4 protein	Membrane	WT+FUT8 KO	1	EQNYSDDVLANMISEPR	6	High-mannosylated	EQNYSDDVLANMISEPR-N2H6F0S0G0	N2H6F0S0G0
FUT8 KO	amyloid beta A4 protein	Membrane	WT+FUT8 KO	1	EQNYSDDVLANMISEPR	6	High-mannosylated	EQNYSDDVLANMISEPR-N2H7F0S0G0	N2H7F0S0G0
FUT8 KO	amyloid beta A4 protein	Membrane	WT+FUT8 KO	1	EQNYSDDVLANMISEPR	6	High-mannosylated	EQNYSDDVLANMISEPR-N2H8F0S0G0	N2H8F0S0G0
FUT8 KO	amyloid beta A4 protein	Membrane	WT+FUT8 KO	1	EQNYSDDVLANMISEPR	6	High-mannosylated	EQNYSDDVLANMISEPR-N2H9F0S0G0	N2H9F0S0G0
FUT8 KO	amyloid-like protein 2	Membrane	WT+FUT8 KO	2	NQSLSLLYK	3	High-mannosylated	NQSLSLLYK-N2H6F0S0G0	N2H6F0S0G0
FUT8 KO	amyloid-like protein 2	Membrane	WT+FUT8 KO	2	NQSLSLLYK	3	High-mannosylated	NQSLSLLYK-N2H8F0S0G0	N2H8F0S0G0
FUT8 KO	amyloid-like protein 2	Membrane	WT+FUT8 KO	2	NQSLSLLYK	3	High-mannosylated	NQSLSLLYK-N2H9F0S0G0	N2H9F0S0G0
FUT8 KO	amyloid-like protein 2	Membrane	WT+FUT8 KO	2	RNQSLSLLYK	4	High-mannosylated	RNQSLSLLYK-N2H5F0S0G0	N2H5F0S0G0
FUT8 KO	amyloid-like protein 2	Membrane	WT+FUT8 KO	2	RNQSLSLLYK	4	High-mannosylated	RNQSLSLLYK-N2H7F0S0G0	N2H7F0S0G0
FUT8 KO	amyloid-like protein 2	Membrane	WT+FUT8 KO	2	RNQSLSLLYK	4	High-mannosylated	RNQSLSLLYK-N2H8F0S0G0	N2H8F0S0G0
FUT8 KO	amyloid-like protein 2	Membrane	WT+FUT8 KO	2	RNQSLSLLYK	4	High-mannosylated	RNQSLSLLYK-N2H9F0S0G0	N2H9F0S0G0
FUT8 KO	anoctamin-6	Membrane	WT+FUT8 KO	1	NADKENPYIGLGNYTLCR	4	High-mannosylated	NADKENPYIGLGNYTLCR-N2H6F0S0G0	N2H6F0S0G0
FUT8 KO	anoctamin-6	Membrane	WT+FUT8 KO	1	NADKENPYIGLGNYTLCR	4	High-mannosylated	NADKENPYIGLGNYTLCR-N2H8F0S0G0	N2H8F0S0G0
FUT8 KO	anoctamin-6	Membrane	WT+FUT8 KO	1	NADKENPYIGLGNYTLCR	4	High-mannosylated	NADKENPYIGLGNYTLCR-N2H9F0S0G0	N2H9F0S0G0
FUT8 KO	anthrax toxin receptor 2	Membrane	WT+FUT8 KO	1	AVTSNSHDGSVLCTFTVNSTYSK	6	Fucosylated	AVTSNSHDGSVLCTFTVNSTYSK-N5H6F3S0G0	N5H6F3S0G0
FUT8 KO	anthrax toxin receptor 2	Membrane	WT+FUT8 KO	1	AVTSNSHDGSVLCTFTVNSTYSK	6	Fucosylated	AVTSNSHDGSVLCTFTVNSTYSK-N5H6F4S0G0	N5H6F4S0G0
FUT8 KO	anthrax toxin receptor 2	Membrane	WT+FUT8 KO	1	AVTSNSHDGSVLCTFTVNSTYSK	6	Complex/Hybrid	AVTSNSHDGSVLCTFTVNSTYSK-N6H7F0S0G0	N6H7F0S0G0
FUT8 KO	anthrax toxin receptor 2	Membrane	WT+FUT8 KO	1	AVTSNSHDGSVLCTFTVNSTYSK	6	Complex/Hybrid	AVTSNSHDGSVLCTFTVNSTYSK-N7H8F0S0G0	N7H8F0S0G0
FUT8 KO	ATP-binding cassette sub-family A member 1	Membrane	WT+FUT8 KO	4	EAFNETNQAIQTISR	10	High-mannosylated	EAFNETNQAIQTISR-N2H5F0S0G0	N2H5F0S0G0
FUT8 KO	ATP-binding cassette sub-family A member 1	Membrane	WT+FUT8 KO	4	EAFNETNQAIQTISR	10	High-mannosylated	EAFNETNQAIQTISR-N2H6F0S0G0	N2H6F0S0G0
FUT8 KO	ATP-binding cassette sub-family A member 1	Membrane	WT+FUT8 KO	4	EAFNETNQAIQTISR	10	High-mannosylated	EAFNETNQAIQTISR-N2H7F0S0G0	N2H7F0S0G0
FUT8 KO	ATP-binding cassette sub-family A member 1	Membrane	WT+FUT8 KO	4	EAFNETNQAIQTISR	10	High-mannosylated	EAFNETNQAIQTISR-N2H8F0S0G0	N2H8F0S0G0
FUT8 KO	ATP-binding cassette sub-family A member 1	Membrane	WT+FUT8 KO	4	EAFNETNQAIQTISR	10	High-mannosylated	EAFNETNQAIQTISR-N2H9F0S0G0	N2H9F0S0G0
FUT8 KO	ATP-binding cassette sub-family A member 1	Membrane	WT+FUT8 KO	4	EAFNETNQAIQTISR	10	Complex/Hybrid	EAFNETNQAIQTISR-N6H5F0S0G0	N6H5F0S0G0
FUT8 KO	ATP-binding cassette sub-family A member 1	Membrane	WT+FUT8 KO	4	EAFNETNQAIQTISR	10	Fucosylated	EAFNETNQAIQTISR-N6H7F2S0G0	N6H7F2S0G0
FUT8 KO	ATP-binding cassette sub-family A member 1	Membrane	WT+FUT8 KO	4	LNSTSPLLTQHLAEATR	15	High-mannosylated	LNSTSPLLTQHLAEATR-N2H8F0S0G0	N2H8F0S0G0
FUT8 KO	ATP-binding cassette sub-family A member 1	Membrane	WT+FUT8 KO	4	LNSTSPLLTQHLAEATR	15	High-mannosylated	LNSTSPLLTQHLAEATR-N2H9F0S0G0	N2H9F0S0G0
FUT8 KO	ATP-binding cassette sub-family A member 1	Membrane	WT+FUT8 KO	4	LNSTSPLLTQHLAEATR	15	Sialylated	LNSTSPLLTQHLAEATR-N5H6F0S2G0	N5H6F0S2G0
FUT8 KO	ATP-binding cassette sub-family A member 1	Membrane	WT+FUT8 KO	4	LNSTSPLLTQHLAEATR	15	Fucosylated	LNSTSPLLTQHLAEATR-N5H6F4S0G0	N5H6F4S0G0
FUT8 KO	ATP-binding cassette sub-family A member 1	Membrane	WT+FUT8 KO	4	LNSTSPLLTQHLAEATR	15	Complex/Hybrid	LNSTSPLLTQHLAEATR-N6H5F0S0G0	N6H5F0S0G0
FUT8 KO	ATP-binding cassette sub-family A member 1	Membrane	WT+FUT8 KO	4	LNSTSPLLTQHLAEATR	15	Complex/Hybrid	LNSTSPLLTQHLAEATR-N6H7F0S0G0	N6H7F0S0G0
FUT8 KO	ATP-binding cassette sub-family A member 1	Membrane	WT+FUT8 KO	4	LNSTSPLLTQHLAEATR	15	Fucosylated	LNSTSPLLTQHLAEATR-N6H7F2S0G0	N6H7F2S0G0
FUT8 KO	ATP-binding cassette sub-family A member 1	Membrane	WT+FUT8 KO	4	LNSTSPLLTQHLAEATR	15	Fucosylated	LNSTSPLLTQHLAEATR-N6H7F4S0G0	N6H7F4S0G0
FUT8 KO	ATP-binding cassette sub-family A member 1	Membrane	WT+FUT8 KO	4	LNSTSPLLTQHLAEATR	15	Sialylated	LNSTSPLLTQHLAEATR-N7H8F0S1G0	N7H8F0S1G0
FUT8 KO	ATP-binding cassette sub-family A member 1	Membrane	WT+FUT8 KO	4	LNSTSPLLTQHLAEATR	15	Fucosylated	LNSTSPLLTQHLAEATR-N7H8F1S0G0	N7H8F1S0G0
FUT8 KO	ATP-binding cassette sub-family A member 1	Membrane	WT+FUT8 KO	4	VFLQGYQLHLSSLCNGSK	2	High-mannosylated	VFLQGYQLHLSSLCNGSK-N2H8F0S0G0	N2H8F0S0G0
FUT8 KO	ATP-binding cassette sub-family A member 1	Membrane	WT+FUT8 KO	4	VFLQGYQLHLSSLCNGSK	2	High-mannosylated	VFLQGYQLHLSSLCNGSK-N2H9F0S0G0	N2H9F0S0G0
FUT8 KO	ATP-binding cassette sub-family A member 1	Membrane	WT+FUT8 KO	4	YPTPGEAPGVVGNFNK	3	High-mannosylated	YPTPGEAPGVVGNFNK-N2H8F0S0G0	N2H8F0S0G0
FUT8 KO	ATP-binding cassette sub-family A member 1	Membrane	WT+FUT8 KO	4	YPTPGEAPGVVGNFNK	3	High-mannosylated	YPTPGEAPGVVGNFNK-N2H9F0S0G0	N2H9F0S0G0
FUT8 KO	ATP-binding cassette sub-family A member 1	Membrane	WT+FUT8 KO	4	YPTPGEAPGVVGNFNK	3	Complex/Hybrid	YPTPGEAPGVVGNFNK-N5H5F0S0G0	N5H5F0S0G0
FUT8 KO	ATP-binding cassette sub-family A member 2	Membrane	WT+FUT8 KO	2	GNPAAYGITVTNHPMNK	1	High-mannosylated	GNPAAYGITVTNHPMNK-N2H9F0S0G0	N2H9F0S0G0
FUT8 KO	ATP-binding cassette sub-family A member 2	Membrane	WT+FUT8 KO	2	SPANGSLGPMLNLSSGESR	2	High-mannosylated	SPANGSLGPMLNLSSGESR-N2H4F0S0G0	N2H4F0S0G0
FUT8 KO	ATP-binding cassette sub-family A member 2	Membrane	WT+FUT8 KO	2	SPANGSLGPMLNLSSGESR	2	Fucosylated	SPANGSLGPMLNLSSGESR-N4H5F3S0G0	N4H5F3S0G0
FUT8 KO	attractin	Membrane	WT+FUT8 KO	2	IDSTGNVTNELR	3	High-mannosylated	IDSTGNVTNELR-N2H6F0S0G0	N2H6F0S0G0
FUT8 KO	attractin	Membrane	WT+FUT8 KO	2	IDSTGNVTNELR	3	High-mannosylated	IDSTGNVTNELR-N2H8F0S0G0	N2H8F0S0G0
FUT8 KO	attractin	Membrane	WT+FUT8 KO	2	IDSTGNVTNELR	3	High-mannosylated	IDSTGNVTNELR-N2H9F0S0G0	N2H9F0S0G0
FUT8 KO	attractin	Membrane	WT+FUT8 KO	2	VFHIHNESWVLLTPK	2	High-mannosylated	VFHIHNESWVLLTPK-N2H7F0S0G0	N2H7F0S0G0
FUT8 KO	attractin	Membrane	WT+FUT8 KO	2	VFHIHNESWVLLTPK	2	High-mannosylated	VFHIHNESWVLLTPK-N2H9F0S0G0	N2H9F0S0G0
FUT8 KO	basement membrane-specific heparan sulfate proteoglycan core protein	Membrane	WT+FUT8 KO	5	GVNVTMPSQPGVPPLSSTQLQIDPALQEFQLVDLSR	10	High-mannosylated	GVNVTMPSQPGVPPLSSTQLQIDPALQEFQLVDLSR-N2H6F0S0G0	N2H6F0S0G0
FUT8 KO	basement membrane-specific heparan sulfate proteoglycan core protein	Membrane	WT+FUT8 KO	5	GVNVTMPSQPGVPPLSSTQLQIDPALQEFQLVDLSR	10	High-mannosylated	GVNVTMPSQPGVPPLSSTQLQIDPALQEFQLVDLSR-N2H7F0S0G0	N2H7F0S0G0
FUT8 KO	basement membrane-specific heparan sulfate proteoglycan core protein	Membrane	WT+FUT8 KO	5	GVNVTMPSQPGVPPLSSTQLQIDPALQEFQLVDLSR	10	High-mannosylated	GVNVTMPSQPGVPPLSSTQLQIDPALQEFQLVDLSR-N2H8F0S0G0	N2H8F0S0G0
FUT8 KO	basement membrane-specific heparan sulfate proteoglycan core protein	Membrane	WT+FUT8 KO	5	GVNVTMPSQPGVPPLSSTQLQIDPALQEFQLVDLSR	10	High-mannosylated	GVNVTMPSQPGVPPLSSTQLQIDPALQEFQLVDLSR-N2H9F0S0G0	N2H9F0S0G0
FUT8 KO	basement membrane-specific heparan sulfate proteoglycan core protein	Membrane	WT+FUT8 KO	5	GVNVTMPSQPGVPPLSSTQLQIDPALQEFQLVDLSR	10	Fucosylated	GVNVTMPSQPGVPPLSSTQLQIDPALQEFQLVDLSR-N4H5F3S0G0	N4H5F3S0G0
FUT8 KO	basement membrane-specific heparan sulfate proteoglycan core protein	Membrane	WT+FUT8 KO	5	GVNVTMPSQPGVPPLSSTQLQIDPALQEFQLVDLSR	10	Complex/Hybrid	GVNVTMPSQPGVPPLSSTQLQIDPALQEFQLVDLSR-N6H6F0S0G0	N6H6F0S0G0
FUT8 KO	basement membrane-specific heparan sulfate proteoglycan core protein	Membrane	WT+FUT8 KO	5	GVNVTMPSQPGVPPLSSTQLQIDPALQEFQLVDLSR	10	Complex/Hybrid	GVNVTMPSQPGVPPLSSTQLQIDPALQEFQLVDLSR-N6H7F0S0G0	N6H7F0S0G0
FUT8 KO	basement membrane-specific heparan sulfate proteoglycan core protein	Membrane	WT+FUT8 KO	5	NQELEDNVHISPNGSIITIVGTRPSNHGAYR	14	Fucosylated	NQELEDNVHISPNGSIITIVGTRPSNHGAYR-N2H3F1S0G0	N2H3F1S0G0
FUT8 KO	basement membrane-specific heparan sulfate proteoglycan core protein	Membrane	WT+FUT8 KO	5	NQELEDNVHISPNGSIITIVGTRPSNHGAYR	14	High-mannosylated	NQELEDNVHISPNGSIITIVGTRPSNHGAYR-N2H5F0S0G0	N2H5F0S0G0
FUT8 KO	basement membrane-specific heparan sulfate proteoglycan core protein	Membrane	WT+FUT8 KO	5	NQELEDNVHISPNGSIITIVGTRPSNHGAYR	14	High-mannosylated	NQELEDNVHISPNGSIITIVGTRPSNHGAYR-N2H6F0S0G0	N2H6F0S0G0
FUT8 KO	basement membrane-specific heparan sulfate proteoglycan core protein	Membrane	WT+FUT8 KO	5	NQELEDNVHISPNGSIITIVGTRPSNHGAYR	14	High-mannosylated	NQELEDNVHISPNGSIITIVGTRPSNHGAYR-N2H7F0S0G0	N2H7F0S0G0
FUT8 KO	basement membrane-specific heparan sulfate proteoglycan core protein	Membrane	WT+FUT8 KO	5	NQELEDNVHISPNGSIITIVGTRPSNHGAYR	14	High-mannosylated	NQELEDNVHISPNGSIITIVGTRPSNHGAYR-N2H8F0S0G0	N2H8F0S0G0
FUT8 KO	basement membrane-specific heparan sulfate proteoglycan core protein	Membrane	WT+FUT8 KO	5	NQELEDNVHISPNGSIITIVGTRPSNHGAYR	14	High-mannosylated	NQELEDNVHISPNGSIITIVGTRPSNHGAYR-N2H9F0S0G0	N2H9F0S0G0
FUT8 KO	basement membrane-specific heparan sulfate proteoglycan core protein	Membrane	WT+FUT8 KO	5	NQELEDNVHISPNGSIITIVGTRPSNHGAYR	14	Fucosylated	NQELEDNVHISPNGSIITIVGTRPSNHGAYR-N4H4F1S0G0	N4H4F1S0G0
FUT8 KO	basement membrane-specific heparan sulfate proteoglycan core protein	Membrane	WT+FUT8 KO	5	NQELEDNVHISPNGSIITIVGTRPSNHGAYR	14	Complex/Hybrid	NQELEDNVHISPNGSIITIVGTRPSNHGAYR-N4H5F0S0G0	N4H5F0S0G0
FUT8 KO	basement membrane-specific heparan sulfate proteoglycan core protein	Membrane	WT+FUT8 KO	5	NQELEDNVHISPNGSIITIVGTRPSNHGAYR	14	Sialylated	NQELEDNVHISPNGSIITIVGTRPSNHGAYR-N4H5F0S1G0	N4H5F0S1G0
FUT8 KO	basement membrane-specific heparan sulfate proteoglycan core protein	Membrane	WT+FUT8 KO	5	NQELEDNVHISPNGSIITIVGTRPSNHGAYR	14	Fucosylated	NQELEDNVHISPNGSIITIVGTRPSNHGAYR-N4H5F1S0G0	N4H5F1S0G0
FUT8 KO	basement membrane-specific heparan sulfate proteoglycan core protein	Membrane	WT+FUT8 KO	5	NQELEDNVHISPNGSIITIVGTRPSNHGAYR	14	Fucosylated	NQELEDNVHISPNGSIITIVGTRPSNHGAYR-N4H5F2S0G0	N4H5F2S0G0
FUT8 KO	basement membrane-specific heparan sulfate proteoglycan core protein	Membrane	WT+FUT8 KO	5	NQELEDNVHISPNGSIITIVGTRPSNHGAYR	14	Complex/Hybrid	NQELEDNVHISPNGSIITIVGTRPSNHGAYR-N6H7F0S0G0	N6H7F0S0G0
FUT8 KO	basement membrane-specific heparan sulfate proteoglycan core protein	Membrane	WT+FUT8 KO	5	SLTHGSLIVGNSAPVNGTSQGK	14	High-mannosylated	SLTHGSLIVGNSAPVNGTSQGK-N2H5F0S0G0	N2H5F0S0G0
FUT8 KO	basement membrane-specific heparan sulfate proteoglycan core protein	Membrane	WT+FUT8 KO	5	SLTHGSLIVGNSAPVNGTSQGK	14	High-mannosylated	SLTHGSLIVGNSAPVNGTSQGK-N2H6F0S0G0	N2H6F0S0G0
FUT8 KO	basement membrane-specific heparan sulfate proteoglycan core protein	Membrane	WT+FUT8 KO	5	SLTHGSLIVGNSAPVNGTSQGK	14	High-mannosylated	SLTHGSLIVGNSAPVNGTSQGK-N2H7F0S0G0	N2H7F0S0G0
FUT8 KO	basement membrane-specific heparan sulfate proteoglycan core protein	Membrane	WT+FUT8 KO	5	SLTHGSLIVGNSAPVNGTSQGK	14	High-mannosylated	SLTHGSLIVGNSAPVNGTSQGK-N2H8F0S0G0	N2H8F0S0G0
FUT8 KO	basement membrane-specific heparan sulfate proteoglycan core protein	Membrane	WT+FUT8 KO	5	SLTHGSLIVGNSAPVNGTSQGK	14	High-mannosylated	SLTHGSLIVGNSAPVNGTSQGK-N2H9F0S0G0	N2H9F0S0G0
FUT8 KO	basement membrane-specific heparan sulfate proteoglycan core protein	Membrane	WT+FUT8 KO	5	SLTHGSLIVGNSAPVNGTSQGK	14	Fucosylated	SLTHGSLIVGNSAPVNGTSQGK-N4H4F1S0G0	N4H4F1S0G0
FUT8 KO	basement membrane-specific heparan sulfate proteoglycan core protein	Membrane	WT+FUT8 KO	5	SLTHGSLIVGNSAPVNGTSQGK	14	Complex/Hybrid	SLTHGSLIVGNSAPVNGTSQGK-N4H5F0S0G0	N4H5F0S0G0
FUT8 KO	basement membrane-specific heparan sulfate proteoglycan core protein	Membrane	WT+FUT8 KO	5	SLTHGSLIVGNSAPVNGTSQGK	14	Sialylated	SLTHGSLIVGNSAPVNGTSQGK-N4H5F0S1G0	N4H5F0S1G0
FUT8 KO	basement membrane-specific heparan sulfate proteoglycan core protein	Membrane	WT+FUT8 KO	5	SLTHGSLIVGNSAPVNGTSQGK	14	Fucosylated	SLTHGSLIVGNSAPVNGTSQGK-N4H5F1S0G0	N4H5F1S0G0
FUT8 KO	basement membrane-specific heparan sulfate proteoglycan core protein	Membrane	WT+FUT8 KO	5	SLTHGSLIVGNSAPVNGTSQGK	14	Fucosylated	SLTHGSLIVGNSAPVNGTSQGK-N4H5F2S0G0	N4H5F2S0G0
FUT8 KO	basement membrane-specific heparan sulfate proteoglycan core protein	Membrane	WT+FUT8 KO	5	SLTHGSLIVGNSAPVNGTSQGK	14	Fucosylated	SLTHGSLIVGNSAPVNGTSQGK-N4H5F3S0G0	N4H5F3S0G0
FUT8 KO	basement membrane-specific heparan sulfate proteoglycan core protein	Membrane	WT+FUT8 KO	5	SLTHGSLIVGNSAPVNGTSQGK	14	Complex/Hybrid	SLTHGSLIVGNSAPVNGTSQGK-N6H5F0S0G0	N6H5F0S0G0
FUT8 KO	basement membrane-specific heparan sulfate proteoglycan core protein	Membrane	WT+FUT8 KO	5	SLTHGSLIVGNSAPVNGTSQGK	14	Complex/Hybrid	SLTHGSLIVGNSAPVNGTSQGK-N6H7F0S0G0	N6H7F0S0G0
FUT8 KO	basement membrane-specific heparan sulfate proteoglycan core protein	Membrane	WT+FUT8 KO	5	SQGLNLHTLLYLGGVEPSVQLSPATNMSAHFR	1	Complex/Hybrid	SQGLNLHTLLYLGGVEPSVQLSPATNMSAHFR-N6H7F0S0G0	N6H7F0S0G0
FUT8 KO	basement membrane-specific heparan sulfate proteoglycan core protein	Membrane	WT+FUT8 KO	5	VCTETEFACHSYNECVALEYR	18	High-mannosylated	VCTETEFACHSYNECVALEYR-N2H3F0S0G0	N2H3F0S0G0
FUT8 KO	basement membrane-specific heparan sulfate proteoglycan core protein	Membrane	WT+FUT8 KO	5	VCTETEFACHSYNECVALEYR	18	High-mannosylated	VCTETEFACHSYNECVALEYR-N2H4F0S0G0	N2H4F0S0G0
FUT8 KO	basement membrane-specific heparan sulfate proteoglycan core protein	Membrane	WT+FUT8 KO	5	VCTETEFACHSYNECVALEYR	18	High-mannosylated	VCTETEFACHSYNECVALEYR-N2H5F0S0G0	N2H5F0S0G0
FUT8 KO	basement membrane-specific heparan sulfate proteoglycan core protein	Membrane	WT+FUT8 KO	5	VCTETEFACHSYNECVALEYR	18	High-mannosylated	VCTETEFACHSYNECVALEYR-N2H6F0S0G0	N2H6F0S0G0
FUT8 KO	basement membrane-specific heparan sulfate proteoglycan core protein	Membrane	WT+FUT8 KO	5	VCTETEFACHSYNECVALEYR	18	High-mannosylated	VCTETEFACHSYNECVALEYR-N2H7F0S0G0	N2H7F0S0G0
FUT8 KO	basement membrane-specific heparan sulfate proteoglycan core protein	Membrane	WT+FUT8 KO	5	VCTETEFACHSYNECVALEYR	18	High-mannosylated	VCTETEFACHSYNECVALEYR-N2H8F0S0G0	N2H8F0S0G0
FUT8 KO	basement membrane-specific heparan sulfate proteoglycan core protein	Membrane	WT+FUT8 KO	5	VCTETEFACHSYNECVALEYR	18	High-mannosylated	VCTETEFACHSYNECVALEYR-N2H9F0S0G0	N2H9F0S0G0
FUT8 KO	basement membrane-specific heparan sulfate proteoglycan core protein	Membrane	WT+FUT8 KO	5	VCTETEFACHSYNECVALEYR	18	Fucosylated	VCTETEFACHSYNECVALEYR-N4H3F1S0G0	N4H3F1S0G0
FUT8 KO	basement membrane-specific heparan sulfate proteoglycan core protein	Membrane	WT+FUT8 KO	5	VCTETEFACHSYNECVALEYR	18	Fucosylated	VCTETEFACHSYNECVALEYR-N4H4F1S0G0	N4H4F1S0G0
FUT8 KO	basement membrane-specific heparan sulfate proteoglycan core protein	Membrane	WT+FUT8 KO	5	VCTETEFACHSYNECVALEYR	18	Sialylated	VCTETEFACHSYNECVALEYR-N4H5F0S1G0	N4H5F0S1G0
FUT8 KO	basement membrane-specific heparan sulfate proteoglycan core protein	Membrane	WT+FUT8 KO	5	VCTETEFACHSYNECVALEYR	18	Sialylated	VCTETEFACHSYNECVALEYR-N4H5F0S2G0	N4H5F0S2G0
FUT8 KO	basement membrane-specific heparan sulfate proteoglycan core protein	Membrane	WT+FUT8 KO	5	VCTETEFACHSYNECVALEYR	18	Fucosylated	VCTETEFACHSYNECVALEYR-N4H5F1S0G0	N4H5F1S0G0
FUT8 KO	basement membrane-specific heparan sulfate proteoglycan core protein	Membrane	WT+FUT8 KO	5	VCTETEFACHSYNECVALEYR	18	Fucosylated	VCTETEFACHSYNECVALEYR-N4H5F3S0G0	N4H5F3S0G0
FUT8 KO	basement membrane-specific heparan sulfate proteoglycan core protein	Membrane	WT+FUT8 KO	5	VCTETEFACHSYNECVALEYR	18	Sialylated	VCTETEFACHSYNECVALEYR-N5H6F0S2G0	N5H6F0S2G0
FUT8 KO	basement membrane-specific heparan sulfate proteoglycan core protein	Membrane	WT+FUT8 KO	5	VCTETEFACHSYNECVALEYR	18	Fucosylated	VCTETEFACHSYNECVALEYR-N5H6F1S0G0	N5H6F1S0G0
FUT8 KO	basement membrane-specific heparan sulfate proteoglycan core protein	Membrane	WT+FUT8 KO	5	VCTETEFACHSYNECVALEYR	18	Complex/Hybrid	VCTETEFACHSYNECVALEYR-N6H7F0S0G0	N6H7F0S0G0
FUT8 KO	basigin	Membrane	WT+FUT8 KO	3	SELTISNLDINSDPGTYMCNATNTQGSVQEIMTLR	5	Fucosylated	SELTISNLDINSDPGTYMCNATNTQGSVQEIMTLR-N2H3F1S0G0	N2H3F1S0G0
FUT8 KO	basigin	Membrane	WT+FUT8 KO	3	SELTISNLDINSDPGTYMCNATNTQGSVQEIMTLR	5	High-mannosylated	SELTISNLDINSDPGTYMCNATNTQGSVQEIMTLR-N2H5F0S0G0	N2H5F0S0G0
FUT8 KO	basigin	Membrane	WT+FUT8 KO	3	SELTISNLDINSDPGTYMCNATNTQGSVQEIMTLR	5	High-mannosylated	SELTISNLDINSDPGTYMCNATNTQGSVQEIMTLR-N2H6F0S0G0	N2H6F0S0G0
FUT8 KO	basigin	Membrane	WT+FUT8 KO	3	SELTISNLDINSDPGTYMCNATNTQGSVQEIMTLR	5	Complex/Hybrid	SELTISNLDINSDPGTYMCNATNTQGSVQEIMTLR-N3H3F0S0G0	N3H3F0S0G0
FUT8 KO	basigin	Membrane	WT+FUT8 KO	3	SELTISNLDINSDPGTYMCNATNTQGSVQEIMTLR	5	Fucosylated	SELTISNLDINSDPGTYMCNATNTQGSVQEIMTLR-N7H8F1S0G0	N7H8F1S0G0
FUT8 KO	basigin	Membrane	WT+FUT8 KO	3	THLTCSLNSSGVDIIGHR	77	Complex/Hybrid	THLTCSLNSSGVDIIGHR-N10H11F0S0G0	N10H11F0S0G0
FUT8 KO	basigin	Membrane	WT+FUT8 KO	3	THLTCSLNSSGVDIIGHR	77	Sialylated	THLTCSLNSSGVDIIGHR-N10H11F0S1G0	N10H11F0S1G0
FUT8 KO	basigin	Membrane	WT+FUT8 KO	3	THLTCSLNSSGVDIIGHR	77	Sialylated	THLTCSLNSSGVDIIGHR-N10H11F0S2G0	N10H11F0S2G0
FUT8 KO	basigin	Membrane	WT+FUT8 KO	3	THLTCSLNSSGVDIIGHR	77	Fucosylated	THLTCSLNSSGVDIIGHR-N10H11F3S0G0	N10H11F3S0G0
FUT8 KO	basigin	Membrane	WT+FUT8 KO	3	THLTCSLNSSGVDIIGHR	77	Fucosylated	THLTCSLNSSGVDIIGHR-N11H12F1S0G0	N11H12F1S0G0
FUT8 KO	basigin	Membrane	WT+FUT8 KO	3	THLTCSLNSSGVDIIGHR	77	High-mannosylated	THLTCSLNSSGVDIIGHR-N2H10F0S0G0	N2H10F0S0G0
FUT8 KO	basigin	Membrane	WT+FUT8 KO	3	THLTCSLNSSGVDIIGHR	77	High-mannosylated	THLTCSLNSSGVDIIGHR-N2H3F0S0G0	N2H3F0S0G0
FUT8 KO	basigin	Membrane	WT+FUT8 KO	3	THLTCSLNSSGVDIIGHR	77	Fucosylated	THLTCSLNSSGVDIIGHR-N2H3F1S0G0	N2H3F1S0G0
FUT8 KO	basigin	Membrane	WT+FUT8 KO	3	THLTCSLNSSGVDIIGHR	77	High-mannosylated	THLTCSLNSSGVDIIGHR-N2H4F0S0G0	N2H4F0S0G0
FUT8 KO	basigin	Membrane	WT+FUT8 KO	3	THLTCSLNSSGVDIIGHR	77	High-mannosylated	THLTCSLNSSGVDIIGHR-N2H5F0S0G0	N2H5F0S0G0
FUT8 KO	basigin	Membrane	WT+FUT8 KO	3	THLTCSLNSSGVDIIGHR	77	High-mannosylated	THLTCSLNSSGVDIIGHR-N2H6F0S0G0	N2H6F0S0G0
FUT8 KO	basigin	Membrane	WT+FUT8 KO	3	THLTCSLNSSGVDIIGHR	77	High-mannosylated	THLTCSLNSSGVDIIGHR-N2H7F0S0G0	N2H7F0S0G0
FUT8 KO	basigin	Membrane	WT+FUT8 KO	3	THLTCSLNSSGVDIIGHR	77	High-mannosylated	THLTCSLNSSGVDIIGHR-N2H8F0S0G0	N2H8F0S0G0
FUT8 KO	basigin	Membrane	WT+FUT8 KO	3	THLTCSLNSSGVDIIGHR	77	High-mannosylated	THLTCSLNSSGVDIIGHR-N2H9F0S0G0	N2H9F0S0G0
FUT8 KO	basigin	Membrane	WT+FUT8 KO	3	THLTCSLNSSGVDIIGHR	77	Fucosylated	THLTCSLNSSGVDIIGHR-N4H3F1S0G0	N4H3F1S0G0
FUT8 KO	basigin	Membrane	WT+FUT8 KO	3	THLTCSLNSSGVDIIGHR	77	Fucosylated	THLTCSLNSSGVDIIGHR-N4H5F2S0G0	N4H5F2S0G0
FUT8 KO	basigin	Membrane	WT+FUT8 KO	3	THLTCSLNSSGVDIIGHR	77	Fucosylated	THLTCSLNSSGVDIIGHR-N4H5F3S0G0	N4H5F3S0G0
FUT8 KO	basigin	Membrane	WT+FUT8 KO	3	THLTCSLNSSGVDIIGHR	77	Fucosylated	THLTCSLNSSGVDIIGHR-N5H3F1S0G0	N5H3F1S0G0
FUT8 KO	basigin	Membrane	WT+FUT8 KO	3	THLTCSLNSSGVDIIGHR	77	Complex/Hybrid	THLTCSLNSSGVDIIGHR-N5H6F0S0G0	N5H6F0S0G0
FUT8 KO	basigin	Membrane	WT+FUT8 KO	3	THLTCSLNSSGVDIIGHR	77	Sialylated	THLTCSLNSSGVDIIGHR-N5H6F0S3G0	N5H6F0S3G0
FUT8 KO	basigin	Membrane	WT+FUT8 KO	3	THLTCSLNSSGVDIIGHR	77	Fucosylated	THLTCSLNSSGVDIIGHR-N5H6F2S0G0	N5H6F2S0G0
FUT8 KO	basigin	Membrane	WT+FUT8 KO	3	THLTCSLNSSGVDIIGHR	77	Fucosylated	THLTCSLNSSGVDIIGHR-N5H6F3S0G0	N5H6F3S0G0
FUT8 KO	basigin	Membrane	WT+FUT8 KO	3	THLTCSLNSSGVDIIGHR	77	Fucosylated	THLTCSLNSSGVDIIGHR-N5H6F4S0G0	N5H6F4S0G0
FUT8 KO	basigin	Membrane	WT+FUT8 KO	3	THLTCSLNSSGVDIIGHR	77	Complex/Hybrid	THLTCSLNSSGVDIIGHR-N6H5F0S0G0	N6H5F0S0G0
FUT8 KO	basigin	Membrane	WT+FUT8 KO	3	THLTCSLNSSGVDIIGHR	77	Complex/Hybrid	THLTCSLNSSGVDIIGHR-N6H6F0S0G0	N6H6F0S0G0
FUT8 KO	basigin	Membrane	WT+FUT8 KO	3	THLTCSLNSSGVDIIGHR	77	Complex/Hybrid	THLTCSLNSSGVDIIGHR-N6H7F0S0G0	N6H7F0S0G0
FUT8 KO	basigin	Membrane	WT+FUT8 KO	3	THLTCSLNSSGVDIIGHR	77	Sialylated	THLTCSLNSSGVDIIGHR-N6H7F0S1G0	N6H7F0S1G0
FUT8 KO	basigin	Membrane	WT+FUT8 KO	3	THLTCSLNSSGVDIIGHR	77	Sialylated	THLTCSLNSSGVDIIGHR-N6H7F0S2G0	N6H7F0S2G0
FUT8 KO	basigin	Membrane	WT+FUT8 KO	3	THLTCSLNSSGVDIIGHR	77	Sialylated	THLTCSLNSSGVDIIGHR-N6H7F0S3G0	N6H7F0S3G0
FUT8 KO	basigin	Membrane	WT+FUT8 KO	3	THLTCSLNSSGVDIIGHR	77	Fucosylated	THLTCSLNSSGVDIIGHR-N6H7F2S0G0	N6H7F2S0G0
FUT8 KO	basigin	Membrane	WT+FUT8 KO	3	THLTCSLNSSGVDIIGHR	77	Fucosylated	THLTCSLNSSGVDIIGHR-N6H7F4S0G0	N6H7F4S0G0
FUT8 KO	basigin	Membrane	WT+FUT8 KO	3	THLTCSLNSSGVDIIGHR	77	Complex/Hybrid	THLTCSLNSSGVDIIGHR-N7H8F0S0G0	N7H8F0S0G0
FUT8 KO	basigin	Membrane	WT+FUT8 KO	3	THLTCSLNSSGVDIIGHR	77	Sialylated	THLTCSLNSSGVDIIGHR-N7H8F0S1G0	N7H8F0S1G0
FUT8 KO	basigin	Membrane	WT+FUT8 KO	3	THLTCSLNSSGVDIIGHR	77	Sialylated	THLTCSLNSSGVDIIGHR-N7H8F0S3G0	N7H8F0S3G0
FUT8 KO	basigin	Membrane	WT+FUT8 KO	3	THLTCSLNSSGVDIIGHR	77	Fucosylated	THLTCSLNSSGVDIIGHR-N7H8F2S0G0	N7H8F2S0G0
FUT8 KO	basigin	Membrane	WT+FUT8 KO	3	THLTCSLNSSGVDIIGHR	77	Fucosylated	THLTCSLNSSGVDIIGHR-N7H8F3S0G0	N7H8F3S0G0
FUT8 KO	basigin	Membrane	WT+FUT8 KO	3	THLTCSLNSSGVDIIGHR	77	Fucosylated	THLTCSLNSSGVDIIGHR-N7H8F4S0G0	N7H8F4S0G0
FUT8 KO	basigin	Membrane	WT+FUT8 KO	3	THLTCSLNSSGVDIIGHR	77	Complex/Hybrid	THLTCSLNSSGVDIIGHR-N8H9F0S0G0	N8H9F0S0G0
FUT8 KO	basigin	Membrane	WT+FUT8 KO	3	THLTCSLNSSGVDIIGHR	77	Sialylated	THLTCSLNSSGVDIIGHR-N8H9F0S1G0	N8H9F0S1G0
FUT8 KO	basigin	Membrane	WT+FUT8 KO	3	THLTCSLNSSGVDIIGHR	77	Sialylated	THLTCSLNSSGVDIIGHR-N8H9F0S2G0	N8H9F0S2G0
FUT8 KO	basigin	Membrane	WT+FUT8 KO	3	THLTCSLNSSGVDIIGHR	77	Fucosylated	THLTCSLNSSGVDIIGHR-N8H9F1S0G0	N8H9F1S0G0
FUT8 KO	basigin	Membrane	WT+FUT8 KO	3	THLTCSLNSSGVDIIGHR	77	Fucosylated	THLTCSLNSSGVDIIGHR-N8H9F4S0G0	N8H9F4S0G0
FUT8 KO	basigin	Membrane	WT+FUT8 KO	3	THLTCSLNSSGVDIIGHR	77	Fucosylated	THLTCSLNSSGVDIIGHR-N8H9F6S0G0	N8H9F6S0G0
FUT8 KO	basigin	Membrane	WT+FUT8 KO	3	THLTCSLNSSGVDIIGHR	77	Sialylated	THLTCSLNSSGVDIIGHR-N9H10F0S2G0	N9H10F0S2G0
FUT8 KO	basigin	Membrane	WT+FUT8 KO	3	THLTCSLNSSGVDIIGHR	77	Fucosylated	THLTCSLNSSGVDIIGHR-N9H10F1S0G0	N9H10F1S0G0
FUT8 KO	basigin	Membrane	WT+FUT8 KO	3	THLTCSLNSSGVDIIGHR	77	Fucosylated	THLTCSLNSSGVDIIGHR-N9H10F3S0G0	N9H10F3S0G0
FUT8 KO	basigin	Membrane	WT+FUT8 KO	3	TSDSGDQLITNSSESK	9	Complex/Hybrid	TSDSGDQLITNSSESK-N10H11F0S0G0	N10H11F0S0G0
FUT8 KO	basigin	Membrane	WT+FUT8 KO	3	TSDSGDQLITNSSESK	9	Fucosylated	TSDSGDQLITNSSESK-N7H8F3S0G0	N7H8F3S0G0
FUT8 KO	basigin	Membrane	WT+FUT8 KO	3	TSDSGDQLITNSSESK	9	Complex/Hybrid	TSDSGDQLITNSSESK-N8H9F0S0G0	N8H9F0S0G0
FUT8 KO	basigin	Membrane	WT+FUT8 KO	3	TSDSGDQLITNSSESK	9	Sialylated	TSDSGDQLITNSSESK-N8H9F0S1G0	N8H9F0S1G0
FUT8 KO	beta-1,3-galactosyltransferase 6	Membrane	WT+FUT8 KO	1	DAYENLTAK	4	Fucosylated	DAYENLTAK-N4H5F2S0G0	N4H5F2S0G0
FUT8 KO	beta-1,3-galactosyltransferase 6	Membrane	WT+FUT8 KO	1	DAYENLTAK	4	Fucosylated	DAYENLTAK-N5H6F4S0G0	N5H6F4S0G0
FUT8 KO	beta-1,3-galactosyltransferase 6	Membrane	WT+FUT8 KO	1	DAYENLTAK	4	Complex/Hybrid	DAYENLTAK-N6H7F0S0G0	N6H7F0S0G0
FUT8 KO	beta-1,3-glucosyltransferase	Membrane	WT+FUT8 KO	1	SILQQASNLTQDLPR	5	High-mannosylated	SILQQASNLTQDLPR-N2H5F0S0G0	N2H5F0S0G0
FUT8 KO	beta-1,3-glucosyltransferase	Membrane	WT+FUT8 KO	1	SILQQASNLTQDLPR	5	High-mannosylated	SILQQASNLTQDLPR-N2H6F0S0G0	N2H6F0S0G0
FUT8 KO	beta-1,3-glucosyltransferase	Membrane	WT+FUT8 KO	1	SILQQASNLTQDLPR	5	High-mannosylated	SILQQASNLTQDLPR-N2H7F0S0G0	N2H7F0S0G0
FUT8 KO	beta-1,3-glucosyltransferase	Membrane	WT+FUT8 KO	1	SILQQASNLTQDLPR	5	High-mannosylated	SILQQASNLTQDLPR-N2H8F0S0G0	N2H8F0S0G0
FUT8 KO	beta-1,3-glucosyltransferase	Membrane	WT+FUT8 KO	1	SILQQASNLTQDLPR	5	High-mannosylated	SILQQASNLTQDLPR-N2H9F0S0G0	N2H9F0S0G0
FUT8 KO	beta-1,4-galactosyltransferase 3	Membrane	WT+FUT8 KO	1	DVYSNLSHLPGAPVAAGASPAEALPFCPER	6	High-mannosylated	DVYSNLSHLPGAPVAAGASPAEALPFCPER-N2H10F0S0G0	N2H10F0S0G0
FUT8 KO	beta-1,4-galactosyltransferase 3	Membrane	WT+FUT8 KO	1	DVYSNLSHLPGAPVAAGASPAEALPFCPER	6	High-mannosylated	DVYSNLSHLPGAPVAAGASPAEALPFCPER-N2H8F0S0G0	N2H8F0S0G0
FUT8 KO	beta-1,4-galactosyltransferase 3	Membrane	WT+FUT8 KO	1	DVYSNLSHLPGAPVAAGASPAEALPFCPER	6	High-mannosylated	DVYSNLSHLPGAPVAAGASPAEALPFCPER-N2H9F0S0G0	N2H9F0S0G0
FUT8 KO	beta-1,4-galactosyltransferase 3	Membrane	WT+FUT8 KO	1	DVYSNLSHLPGAPVAAGASPAEALPFCPER	6	Sialylated	DVYSNLSHLPGAPVAAGASPAEALPFCPER-N4H5F0S2G0	N4H5F0S2G0
FUT8 KO	beta-1,4-galactosyltransferase 3	Membrane	WT+FUT8 KO	1	DVYSNLSHLPGAPVAAGASPAEALPFCPER	6	Complex/Hybrid	DVYSNLSHLPGAPVAAGASPAEALPFCPER-N6H5F0S0G0	N6H5F0S0G0
FUT8 KO	beta-1,4-galactosyltransferase 3	Membrane	WT+FUT8 KO	1	DVYSNLSHLPGAPVAAGASPAEALPFCPER	6	Fucosylated	DVYSNLSHLPGAPVAAGASPAEALPFCPER-N8H9F2S0G0	N8H9F2S0G0
FUT8 KO	beta-galactosidase	Membrane	WT+FUT8 KO	3	HILTTSAPNNITVLELER	10	High-mannosylated	HILTTSAPNNITVLELER-N2H8F0S0G0	N2H8F0S0G0
FUT8 KO	beta-galactosidase	Membrane	WT+FUT8 KO	3	HILTTSAPNNITVLELER	10	High-mannosylated	HILTTSAPNNITVLELER-N2H9F0S0G0	N2H9F0S0G0
FUT8 KO	beta-galactosidase	Membrane	WT+FUT8 KO	3	HILTTSAPNNITVLELER	10	Complex/Hybrid	HILTTSAPNNITVLELER-N3H3F0S0G0	N3H3F0S0G0
FUT8 KO	beta-galactosidase	Membrane	WT+FUT8 KO	3	HILTTSAPNNITVLELER	10	Complex/Hybrid	HILTTSAPNNITVLELER-N4H5F0S0G0	N4H5F0S0G0
FUT8 KO	beta-galactosidase	Membrane	WT+FUT8 KO	3	HILTTSAPNNITVLELER	10	Sialylated	HILTTSAPNNITVLELER-N4H5F0S1G0	N4H5F0S1G0
FUT8 KO	beta-galactosidase	Membrane	WT+FUT8 KO	3	HILTTSAPNNITVLELER	10	Sialylated	HILTTSAPNNITVLELER-N4H5F0S2G0	N4H5F0S2G0
FUT8 KO	beta-galactosidase	Membrane	WT+FUT8 KO	3	HILTTSAPNNITVLELER	10	Fucosylated	HILTTSAPNNITVLELER-N4H5F2S0G0	N4H5F2S0G0
FUT8 KO	beta-galactosidase	Membrane	WT+FUT8 KO	3	HILTTSAPNNITVLELER	10	Sialylated	HILTTSAPNNITVLELER-N5H6F0S1G0	N5H6F0S1G0
FUT8 KO	beta-galactosidase	Membrane	WT+FUT8 KO	3	HILTTSAPNNITVLELER	10	Fucosylated	HILTTSAPNNITVLELER-N5H6F4S0G0	N5H6F4S0G0
FUT8 KO	beta-galactosidase	Membrane	WT+FUT8 KO	3	NITQAFLIQR	8	High-mannosylated	NITQAFLIQR-N2H10F0S0G0	N2H10F0S0G0
FUT8 KO	beta-galactosidase	Membrane	WT+FUT8 KO	3	NITQAFLIQR	8	High-mannosylated	NITQAFLIQR-N2H4F0S0G0	N2H4F0S0G0
FUT8 KO	beta-galactosidase	Membrane	WT+FUT8 KO	3	NITQAFLIQR	8	High-mannosylated	NITQAFLIQR-N2H5F0S0G0	N2H5F0S0G0
FUT8 KO	beta-galactosidase	Membrane	WT+FUT8 KO	3	NITQAFLIQR	8	High-mannosylated	NITQAFLIQR-N2H6F0S0G0	N2H6F0S0G0
FUT8 KO	beta-galactosidase	Membrane	WT+FUT8 KO	3	NITQAFLIQR	8	High-mannosylated	NITQAFLIQR-N2H7F0S0G0	N2H7F0S0G0
FUT8 KO	beta-galactosidase	Membrane	WT+FUT8 KO	3	NITQAFLIQR	8	High-mannosylated	NITQAFLIQR-N2H8F0S0G0	N2H8F0S0G0
FUT8 KO	beta-galactosidase	Membrane	WT+FUT8 KO	3	NITQAFLIQR	8	High-mannosylated	NITQAFLIQR-N2H9F0S0G0	N2H9F0S0G0
FUT8 KO	beta-galactosidase	Membrane	WT+FUT8 KO	3	NITQAFLIQR	8	Complex/Hybrid	NITQAFLIQR-N6H5F0S0G0	N6H5F0S0G0
FUT8 KO	beta-galactosidase	Membrane	WT+FUT8 KO	3	TTLPQECNGSMPIFSSPFNGVR	2	High-mannosylated	TTLPQECNGSMPIFSSPFNGVR-N2H6F0S0G0	N2H6F0S0G0
FUT8 KO	beta-galactosidase	Membrane	WT+FUT8 KO	3	TTLPQECNGSMPIFSSPFNGVR	2	High-mannosylated	TTLPQECNGSMPIFSSPFNGVR-N2H7F0S0G0	N2H7F0S0G0
FUT8 KO	beta-glucuronidase	Lysosome	WT+FUT8 KO	2	VTIAINNTLTPHTLPPGSIIYK	2	High-mannosylated	VTIAINNTLTPHTLPPGSIIYK-N2H8F0S0G0	N2H8F0S0G0
FUT8 KO	beta-glucuronidase	Lysosome	WT+FUT8 KO	2	VTIAINNTLTPHTLPPGSIIYK	2	High-mannosylated	VTIAINNTLTPHTLPPGSIIYK-N2H9F0S0G0	N2H9F0S0G0
FUT8 KO	beta-glucuronidase	Lysosome	WT+FUT8 KO	2	YGIVVIDECPGVGIVLPQSLGNESLR	7	High-mannosylated	YGIVVIDECPGVGIVLPQSLGNESLR-N2H10F0S0G0	N2H10F0S0G0
FUT8 KO	beta-glucuronidase	Lysosome	WT+FUT8 KO	2	YGIVVIDECPGVGIVLPQSLGNESLR	7	High-mannosylated	YGIVVIDECPGVGIVLPQSLGNESLR-N2H5F0S0G0	N2H5F0S0G0
FUT8 KO	beta-glucuronidase	Lysosome	WT+FUT8 KO	2	YGIVVIDECPGVGIVLPQSLGNESLR	7	Fucosylated	YGIVVIDECPGVGIVLPQSLGNESLR-N2H5F1S0G0	N2H5F1S0G0
FUT8 KO	beta-glucuronidase	Lysosome	WT+FUT8 KO	2	YGIVVIDECPGVGIVLPQSLGNESLR	7	High-mannosylated	YGIVVIDECPGVGIVLPQSLGNESLR-N2H6F0S0G0	N2H6F0S0G0
FUT8 KO	beta-glucuronidase	Lysosome	WT+FUT8 KO	2	YGIVVIDECPGVGIVLPQSLGNESLR	7	High-mannosylated	YGIVVIDECPGVGIVLPQSLGNESLR-N2H7F0S0G0	N2H7F0S0G0
FUT8 KO	beta-glucuronidase	Lysosome	WT+FUT8 KO	2	YGIVVIDECPGVGIVLPQSLGNESLR	7	High-mannosylated	YGIVVIDECPGVGIVLPQSLGNESLR-N2H8F0S0G0	N2H8F0S0G0
FUT8 KO	beta-glucuronidase	Lysosome	WT+FUT8 KO	2	YGIVVIDECPGVGIVLPQSLGNESLR	7	High-mannosylated	YGIVVIDECPGVGIVLPQSLGNESLR-N2H9F0S0G0	N2H9F0S0G0
FUT8 KO	beta-hexosaminidase subunit alpha	Lysosome	WT+FUT8 KO	2	LWSSNLTTNMDFAFK	3	High-mannosylated	LWSSNLTTNMDFAFK-N2H5F0S0G0	N2H5F0S0G0
FUT8 KO	beta-hexosaminidase subunit alpha	Lysosome	WT+FUT8 KO	2	LWSSNLTTNMDFAFK	3	High-mannosylated	LWSSNLTTNMDFAFK-N2H6F0S0G0	N2H6F0S0G0
FUT8 KO	beta-hexosaminidase subunit alpha	Lysosome	WT+FUT8 KO	2	LWSSNLTTNMDFAFK	3	High-mannosylated	LWSSNLTTNMDFAFK-N2H7F0S0G0	N2H7F0S0G0
FUT8 KO	beta-hexosaminidase subunit alpha	Lysosome	WT+FUT8 KO	2	SAEGTFFINK	6	High-mannosylated	SAEGTFFINK-N2H10F0S0G0	N2H10F0S0G0
FUT8 KO	beta-hexosaminidase subunit alpha	Lysosome	WT+FUT8 KO	2	SAEGTFFINK	6	High-mannosylated	SAEGTFFINK-N2H5F0S0G0	N2H5F0S0G0
FUT8 KO	beta-hexosaminidase subunit alpha	Lysosome	WT+FUT8 KO	2	SAEGTFFINK	6	High-mannosylated	SAEGTFFINK-N2H6F0S0G0	N2H6F0S0G0
FUT8 KO	beta-hexosaminidase subunit alpha	Lysosome	WT+FUT8 KO	2	SAEGTFFINK	6	High-mannosylated	SAEGTFFINK-N2H7F0S0G0	N2H7F0S0G0
FUT8 KO	beta-hexosaminidase subunit alpha	Lysosome	WT+FUT8 KO	2	SAEGTFFINK	6	High-mannosylated	SAEGTFFINK-N2H8F0S0G0	N2H8F0S0G0
FUT8 KO	beta-hexosaminidase subunit alpha	Lysosome	WT+FUT8 KO	2	SAEGTFFINK	6	High-mannosylated	SAEGTFFINK-N2H9F0S0G0	N2H9F0S0G0
FUT8 KO	beta-hexosaminidase subunit beta	Membrane	WT+FUT8 KO	3	GLETFSQLVYQDSDGAFTINK	4	High-mannosylated	GLETFSQLVYQDSDGAFTINK-N2H6F0S0G0	N2H6F0S0G0
FUT8 KO	beta-hexosaminidase subunit beta	Membrane	WT+FUT8 KO	3	GLETFSQLVYQDSDGAFTINK	4	High-mannosylated	GLETFSQLVYQDSDGAFTINK-N2H8F0S0G0	N2H8F0S0G0
FUT8 KO	beta-hexosaminidase subunit beta	Membrane	WT+FUT8 KO	3	GLETFSQLVYQDSDGAFTINK	4	High-mannosylated	GLETFSQLVYQDSDGAFTINK-N2H9F0S0G0	N2H9F0S0G0
FUT8 KO	beta-hexosaminidase subunit beta	Membrane	WT+FUT8 KO	3	GLETFSQLVYQDSDGAFTINK	4	Complex/Hybrid	GLETFSQLVYQDSDGAFTINK-N6H5F0S0G0	N6H5F0S0G0
FUT8 KO	beta-hexosaminidase subunit beta	Membrane	WT+FUT8 KO	3	GLETFSQLVYQDSYGAFTINK	7	High-mannosylated	GLETFSQLVYQDSYGAFTINK-N2H3F0S0G0	N2H3F0S0G0
FUT8 KO	beta-hexosaminidase subunit beta	Membrane	WT+FUT8 KO	3	GLETFSQLVYQDSYGAFTINK	7	High-mannosylated	GLETFSQLVYQDSYGAFTINK-N2H4F0S0G0	N2H4F0S0G0
FUT8 KO	beta-hexosaminidase subunit beta	Membrane	WT+FUT8 KO	3	GLETFSQLVYQDSYGAFTINK	7	High-mannosylated	GLETFSQLVYQDSYGAFTINK-N2H5F0S0G0	N2H5F0S0G0
FUT8 KO	beta-hexosaminidase subunit beta	Membrane	WT+FUT8 KO	3	GLETFSQLVYQDSYGAFTINK	7	High-mannosylated	GLETFSQLVYQDSYGAFTINK-N2H6F0S0G0	N2H6F0S0G0
FUT8 KO	beta-hexosaminidase subunit beta	Membrane	WT+FUT8 KO	3	GLETFSQLVYQDSYGAFTINK	7	High-mannosylated	GLETFSQLVYQDSYGAFTINK-N2H7F0S0G0	N2H7F0S0G0
FUT8 KO	beta-hexosaminidase subunit beta	Membrane	WT+FUT8 KO	3	GLETFSQLVYQDSYGAFTINK	7	High-mannosylated	GLETFSQLVYQDSYGAFTINK-N2H8F0S0G0	N2H8F0S0G0
FUT8 KO	beta-hexosaminidase subunit beta	Membrane	WT+FUT8 KO	3	GLETFSQLVYQDSYGAFTINK	7	Fucosylated	GLETFSQLVYQDSYGAFTINK-N4H5F2S0G0	N4H5F2S0G0
FUT8 KO	beta-hexosaminidase subunit beta	Membrane	WT+FUT8 KO	3	VSPELLNIAPENFLISHGPNSTADPSCSLLQEAFR	4	High-mannosylated	VSPELLNIAPENFLISHGPNSTADPSCSLLQEAFR-N2H5F0S0G0	N2H5F0S0G0
FUT8 KO	beta-hexosaminidase subunit beta	Membrane	WT+FUT8 KO	3	VSPELLNIAPENFLISHGPNSTADPSCSLLQEAFR	4	High-mannosylated	VSPELLNIAPENFLISHGPNSTADPSCSLLQEAFR-N2H6F0S0G0	N2H6F0S0G0
FUT8 KO	beta-hexosaminidase subunit beta	Membrane	WT+FUT8 KO	3	VSPELLNIAPENFLISHGPNSTADPSCSLLQEAFR	4	High-mannosylated	VSPELLNIAPENFLISHGPNSTADPSCSLLQEAFR-N2H7F0S0G0	N2H7F0S0G0
FUT8 KO	beta-hexosaminidase subunit beta	Membrane	WT+FUT8 KO	3	VSPELLNIAPENFLISHGPNSTADPSCSLLQEAFR	4	Fucosylated	VSPELLNIAPENFLISHGPNSTADPSCSLLQEAFR-N7H8F1S0G0	N7H8F1S0G0
FUT8 KO	biotinidase	Cytoplasm	WT+FUT8 KO	2	FNDTEVLQR	2	High-mannosylated	FNDTEVLQR-N2H6F0S0G0	N2H6F0S0G0
FUT8 KO	biotinidase	Cytoplasm	WT+FUT8 KO	2	FNDTEVLQR	2	High-mannosylated	FNDTEVLQR-N2H7F0S0G0	N2H7F0S0G0
FUT8 KO	biotinidase	Cytoplasm	WT+FUT8 KO	2	YQFNTNVVFSNNGTLVDR	1	High-mannosylated	YQFNTNVVFSNNGTLVDR-N2H6F0S0G0	N2H6F0S0G0
FUT8 KO	bone marrow stromal antigen 2	Membrane	WT+FUT8 KO	1	SQDNLAQAEAQASTCNR	26	High-mannosylated	SQDNLAQAEAQASTCNR-N2H10F0S0G0	N2H10F0S0G0
FUT8 KO	bone marrow stromal antigen 2	Membrane	WT+FUT8 KO	1	SQDNLAQAEAQASTCNR	26	High-mannosylated	SQDNLAQAEAQASTCNR-N2H6F0S0G0	N2H6F0S0G0
FUT8 KO	bone marrow stromal antigen 2	Membrane	WT+FUT8 KO	1	SQDNLAQAEAQASTCNR	26	High-mannosylated	SQDNLAQAEAQASTCNR-N2H7F0S0G0	N2H7F0S0G0
FUT8 KO	bone marrow stromal antigen 2	Membrane	WT+FUT8 KO	1	SQDNLAQAEAQASTCNR	26	High-mannosylated	SQDNLAQAEAQASTCNR-N2H8F0S0G0	N2H8F0S0G0
FUT8 KO	bone marrow stromal antigen 2	Membrane	WT+FUT8 KO	1	SQDNLAQAEAQASTCNR	26	High-mannosylated	SQDNLAQAEAQASTCNR-N2H9F0S0G0	N2H9F0S0G0
FUT8 KO	bone marrow stromal antigen 2	Membrane	WT+FUT8 KO	1	SQDNLAQAEAQASTCNR	26	Fucosylated	SQDNLAQAEAQASTCNR-N4H5F2S0G0	N4H5F2S0G0
FUT8 KO	bone marrow stromal antigen 2	Membrane	WT+FUT8 KO	1	SQDNLAQAEAQASTCNR	26	Fucosylated	SQDNLAQAEAQASTCNR-N5H6F2S0G0	N5H6F2S0G0
FUT8 KO	bone marrow stromal antigen 2	Membrane	WT+FUT8 KO	1	SQDNLAQAEAQASTCNR	26	Fucosylated	SQDNLAQAEAQASTCNR-N5H6F4S0G0	N5H6F4S0G0
FUT8 KO	bone marrow stromal antigen 2	Membrane	WT+FUT8 KO	1	SQDNLAQAEAQASTCNR	26	Complex/Hybrid	SQDNLAQAEAQASTCNR-N6H7F0S0G0	N6H7F0S0G0
FUT8 KO	bone marrow stromal antigen 2	Membrane	WT+FUT8 KO	1	SQDNLAQAEAQASTCNR	26	Fucosylated	SQDNLAQAEAQASTCNR-N6H7F1S0G0	N6H7F1S0G0
FUT8 KO	bone marrow stromal antigen 2	Membrane	WT+FUT8 KO	1	SQDNLAQAEAQASTCNR	26	Fucosylated	SQDNLAQAEAQASTCNR-N6H7F4S0G0	N6H7F4S0G0
FUT8 KO	bone marrow stromal antigen 2	Membrane	WT+FUT8 KO	1	SQDNLAQAEAQASTCNR	26	Complex/Hybrid	SQDNLAQAEAQASTCNR-N7H8F0S0G0	N7H8F0S0G0
FUT8 KO	bone marrow stromal antigen 2	Membrane	WT+FUT8 KO	1	SQDNLAQAEAQASTCNR	26	Fucosylated	SQDNLAQAEAQASTCNR-N7H8F4S0G0	N7H8F4S0G0
FUT8 KO	bone marrow stromal antigen 2	Membrane	WT+FUT8 KO	1	SQDNLAQAEAQASTCNR	26	Complex/Hybrid	SQDNLAQAEAQASTCNR-N8H9F0S0G0	N8H9F0S0G0
FUT8 KO	bone marrow stromal antigen 2	Membrane	WT+FUT8 KO	1	SQDNLAQAEAQASTCNR	26	Sialylated	SQDNLAQAEAQASTCNR-N8H9F0S1G0	N8H9F0S1G0
FUT8 KO	bone morphogenetic protein 1	Extracellular region	WT+FUT8 KO	1	AAVPGNSSALGGQSTSGQPQR	5	High-mannosylated	AAVPGNSSALGGQSTSGQPQR-N2H10F0S0G0	N2H10F0S0G0
FUT8 KO	bone morphogenetic protein 1	Extracellular region	WT+FUT8 KO	1	AAVPGNSSALGGQSTSGQPQR	5	High-mannosylated	AAVPGNSSALGGQSTSGQPQR-N2H6F0S0G0	N2H6F0S0G0
FUT8 KO	bone morphogenetic protein 1	Extracellular region	WT+FUT8 KO	1	AAVPGNSSALGGQSTSGQPQR	5	High-mannosylated	AAVPGNSSALGGQSTSGQPQR-N2H7F0S0G0	N2H7F0S0G0
FUT8 KO	bone morphogenetic protein 1	Extracellular region	WT+FUT8 KO	1	AAVPGNSSALGGQSTSGQPQR	5	High-mannosylated	AAVPGNSSALGGQSTSGQPQR-N2H8F0S0G0	N2H8F0S0G0
FUT8 KO	bone morphogenetic protein 1	Extracellular region	WT+FUT8 KO	1	AAVPGNSSALGGQSTSGQPQR	5	High-mannosylated	AAVPGNSSALGGQSTSGQPQR-N2H9F0S0G0	N2H9F0S0G0
FUT8 KO	cadherin-9	Membrane	WT+FUT8 KO	2	ESSPWHNITITATEINNPK	2	Complex/Hybrid	ESSPWHNITITATEINNPK-N6H7F0S0G0	N6H7F0S0G0
FUT8 KO	cadherin-9	Membrane	WT+FUT8 KO	2	VFSIHSENGSIFTLKPLDR	2	Fucosylated	VFSIHSENGSIFTLKPLDR-N4H5F2S0G0	N4H5F2S0G0
FUT8 KO	calreticulin	Membrane	WT+FUT8 KO	1	SGTIFDNFLITNDEAYAEEFGNETWGVTK	3	High-mannosylated	SGTIFDNFLITNDEAYAEEFGNETWGVTK-N2H5F0S0G0	N2H5F0S0G0
FUT8 KO	calreticulin	Membrane	WT+FUT8 KO	1	SGTIFDNFLITNDEAYAEEFGNETWGVTK	3	High-mannosylated	SGTIFDNFLITNDEAYAEEFGNETWGVTK-N2H6F0S0G0	N2H6F0S0G0
FUT8 KO	calreticulin	Membrane	WT+FUT8 KO	1	SGTIFDNFLITNDEAYAEEFGNETWGVTK	3	High-mannosylated	SGTIFDNFLITNDEAYAEEFGNETWGVTK-N2H8F0S0G0	N2H8F0S0G0
FUT8 KO	calumenin	Membrane	WT+FUT8 KO	3	GHDLNEDGLVSWEEYKNATYGYALDDPDPDDGFNYK	10	Fucosylated	GHDLNEDGLVSWEEYKNATYGYALDDPDPDDGFNYK-N2H3F1S0G0	N2H3F1S0G0
FUT8 KO	calumenin	Membrane	WT+FUT8 KO	3	GHDLNEDGLVSWEEYKNATYGYALDDPDPDDGFNYK	10	Fucosylated	GHDLNEDGLVSWEEYKNATYGYALDDPDPDDGFNYK-N4H3F1S0G0	N4H3F1S0G0
FUT8 KO	calumenin	Membrane	WT+FUT8 KO	3	GHDLNEDGLVSWEEYKNATYGYALDDPDPDDGFNYK	10	Fucosylated	GHDLNEDGLVSWEEYKNATYGYALDDPDPDDGFNYK-N4H4F1S0G0	N4H4F1S0G0
FUT8 KO	calumenin	Membrane	WT+FUT8 KO	3	GHDLNEDGLVSWEEYKNATYGYALDDPDPDDGFNYK	10	Fucosylated	GHDLNEDGLVSWEEYKNATYGYALDDPDPDDGFNYK-N5H3F1S0G0	N5H3F1S0G0
FUT8 KO	calumenin	Membrane	WT+FUT8 KO	3	GHDLNEDGLVSWEEYKNATYGYALDDPDPDDGFNYK	10	Complex/Hybrid	GHDLNEDGLVSWEEYKNATYGYALDDPDPDDGFNYK-N5H4F0S0G0	N5H4F0S0G0
FUT8 KO	calumenin	Membrane	WT+FUT8 KO	3	GHDLNEDGLVSWEEYKNATYGYALDDPDPDDGFNYK	10	Fucosylated	GHDLNEDGLVSWEEYKNATYGYALDDPDPDDGFNYK-N5H4F1S0G0	N5H4F1S0G0
FUT8 KO	calumenin	Membrane	WT+FUT8 KO	3	GHDLNEDGLVSWEEYKNATYGYALDDPDPDDGFNYK	10	Complex/Hybrid	GHDLNEDGLVSWEEYKNATYGYALDDPDPDDGFNYK-N6H7F0S0G0	N6H7F0S0G0
FUT8 KO	calumenin	Membrane	WT+FUT8 KO	3	GHDLNEDGLVSWEEYKNATYGYALDDPDPDDGFNYK	10	Fucosylated	GHDLNEDGLVSWEEYKNATYGYALDDPDPDDGFNYK-N7H8F1S0G0	N7H8F1S0G0
FUT8 KO	calumenin	Membrane	WT+FUT8 KO	3	GHDLNEDGLVSWEEYKNATYGYALDDPDPDDGFNYK	10	Fucosylated	GHDLNEDGLVSWEEYKNATYGYALDDPDPDDGFNYK-N7H8F2S0G0	N7H8F2S0G0
FUT8 KO	calumenin	Membrane	WT+FUT8 KO	3	GHDLNEDGLVSWEEYKNATYGYALDDPDPDDGFNYK	10	Fucosylated	GHDLNEDGLVSWEEYKNATYGYALDDPDPDDGFNYK-N9H10F4S0G0	N9H10F4S0G0
FUT8 KO	calumenin	Membrane	WT+FUT8 KO	3	NATYGYALDDPDPDDGFNYK	31	Fucosylated	NATYGYALDDPDPDDGFNYK-N14H15F3S0G0	N14H15F3S0G0
FUT8 KO	calumenin	Membrane	WT+FUT8 KO	3	NATYGYALDDPDPDDGFNYK	31	High-mannosylated	NATYGYALDDPDPDDGFNYK-N2H3F0S0G0	N2H3F0S0G0
FUT8 KO	calumenin	Membrane	WT+FUT8 KO	3	NATYGYALDDPDPDDGFNYK	31	Fucosylated	NATYGYALDDPDPDDGFNYK-N2H3F1S0G0	N2H3F1S0G0
FUT8 KO	calumenin	Membrane	WT+FUT8 KO	3	NATYGYALDDPDPDDGFNYK	31	High-mannosylated	NATYGYALDDPDPDDGFNYK-N2H4F0S0G0	N2H4F0S0G0
FUT8 KO	calumenin	Membrane	WT+FUT8 KO	3	NATYGYALDDPDPDDGFNYK	31	High-mannosylated	NATYGYALDDPDPDDGFNYK-N2H5F0S0G0	N2H5F0S0G0
FUT8 KO	calumenin	Membrane	WT+FUT8 KO	3	NATYGYALDDPDPDDGFNYK	31	High-mannosylated	NATYGYALDDPDPDDGFNYK-N2H6F0S0G0	N2H6F0S0G0
FUT8 KO	calumenin	Membrane	WT+FUT8 KO	3	NATYGYALDDPDPDDGFNYK	31	High-mannosylated	NATYGYALDDPDPDDGFNYK-N2H7F0S0G0	N2H7F0S0G0
FUT8 KO	calumenin	Membrane	WT+FUT8 KO	3	NATYGYALDDPDPDDGFNYK	31	High-mannosylated	NATYGYALDDPDPDDGFNYK-N2H8F0S0G0	N2H8F0S0G0
FUT8 KO	calumenin	Membrane	WT+FUT8 KO	3	NATYGYALDDPDPDDGFNYK	31	High-mannosylated	NATYGYALDDPDPDDGFNYK-N2H9F0S0G0	N2H9F0S0G0
FUT8 KO	calumenin	Membrane	WT+FUT8 KO	3	NATYGYALDDPDPDDGFNYK	31	Complex/Hybrid	NATYGYALDDPDPDDGFNYK-N3H3F0S0G0	N3H3F0S0G0
FUT8 KO	calumenin	Membrane	WT+FUT8 KO	3	NATYGYALDDPDPDDGFNYK	31	Fucosylated	NATYGYALDDPDPDDGFNYK-N4H3F1S0G0	N4H3F1S0G0
FUT8 KO	calumenin	Membrane	WT+FUT8 KO	3	NATYGYALDDPDPDDGFNYK	31	Fucosylated	NATYGYALDDPDPDDGFNYK-N4H4F1S0G0	N4H4F1S0G0
FUT8 KO	calumenin	Membrane	WT+FUT8 KO	3	NATYGYALDDPDPDDGFNYK	31	Complex/Hybrid	NATYGYALDDPDPDDGFNYK-N4H5F0S0G0	N4H5F0S0G0
FUT8 KO	calumenin	Membrane	WT+FUT8 KO	3	NATYGYALDDPDPDDGFNYK	31	Sialylated	NATYGYALDDPDPDDGFNYK-N4H5F0S1G0	N4H5F0S1G0
FUT8 KO	calumenin	Membrane	WT+FUT8 KO	3	NATYGYALDDPDPDDGFNYK	31	Fucosylated	NATYGYALDDPDPDDGFNYK-N4H5F1S0G0	N4H5F1S0G0
FUT8 KO	calumenin	Membrane	WT+FUT8 KO	3	NATYGYALDDPDPDDGFNYK	31	Fucosylated	NATYGYALDDPDPDDGFNYK-N4H5F2S0G0	N4H5F2S0G0
FUT8 KO	calumenin	Membrane	WT+FUT8 KO	3	NATYGYALDDPDPDDGFNYK	31	Fucosylated	NATYGYALDDPDPDDGFNYK-N4H5F3S0G0	N4H5F3S0G0
FUT8 KO	calumenin	Membrane	WT+FUT8 KO	3	NATYGYALDDPDPDDGFNYK	31	Complex/Hybrid	NATYGYALDDPDPDDGFNYK-N4H6F0S0G0	N4H6F0S0G0
FUT8 KO	calumenin	Membrane	WT+FUT8 KO	3	NATYGYALDDPDPDDGFNYK	31	Fucosylated	NATYGYALDDPDPDDGFNYK-N5H3F1S0G0	N5H3F1S0G0
FUT8 KO	calumenin	Membrane	WT+FUT8 KO	3	NATYGYALDDPDPDDGFNYK	31	Complex/Hybrid	NATYGYALDDPDPDDGFNYK-N5H4F0S0G0	N5H4F0S0G0
FUT8 KO	calumenin	Membrane	WT+FUT8 KO	3	NATYGYALDDPDPDDGFNYK	31	Fucosylated	NATYGYALDDPDPDDGFNYK-N5H4F1S0G0	N5H4F1S0G0
FUT8 KO	calumenin	Membrane	WT+FUT8 KO	3	NATYGYALDDPDPDDGFNYK	31	Complex/Hybrid	NATYGYALDDPDPDDGFNYK-N5H5F0S0G0	N5H5F0S0G0
FUT8 KO	calumenin	Membrane	WT+FUT8 KO	3	NATYGYALDDPDPDDGFNYK	31	Fucosylated	NATYGYALDDPDPDDGFNYK-N5H6F2S0G0	N5H6F2S0G0
FUT8 KO	calumenin	Membrane	WT+FUT8 KO	3	NATYGYALDDPDPDDGFNYK	31	Fucosylated	NATYGYALDDPDPDDGFNYK-N5H6F4S0G0	N5H6F4S0G0
FUT8 KO	calumenin	Membrane	WT+FUT8 KO	3	NATYGYALDDPDPDDGFNYK	31	Fucosylated	NATYGYALDDPDPDDGFNYK-N6H6F4S0G0	N6H6F4S0G0
FUT8 KO	calumenin	Membrane	WT+FUT8 KO	3	NATYGYALDDPDPDDGFNYK	31	Fucosylated	NATYGYALDDPDPDDGFNYK-N6H7F4S0G0	N6H7F4S0G0
FUT8 KO	calumenin	Membrane	WT+FUT8 KO	3	NVTYGTYLDDPDPDDGFNYK	33	Fucosylated	NVTYGTYLDDPDPDDGFNYK-N11H12F4S0G0	N11H12F4S0G0
FUT8 KO	calumenin	Membrane	WT+FUT8 KO	3	NVTYGTYLDDPDPDDGFNYK	33	Fucosylated	NVTYGTYLDDPDPDDGFNYK-N11H12F5S0G0	N11H12F5S0G0
FUT8 KO	calumenin	Membrane	WT+FUT8 KO	3	NVTYGTYLDDPDPDDGFNYK	33	Fucosylated	NVTYGTYLDDPDPDDGFNYK-N11H12F6S0G0	N11H12F6S0G0
FUT8 KO	calumenin	Membrane	WT+FUT8 KO	3	NVTYGTYLDDPDPDDGFNYK	33	High-mannosylated	NVTYGTYLDDPDPDDGFNYK-N2H3F0S0G0	N2H3F0S0G0
FUT8 KO	calumenin	Membrane	WT+FUT8 KO	3	NVTYGTYLDDPDPDDGFNYK	33	Fucosylated	NVTYGTYLDDPDPDDGFNYK-N2H3F1S0G0	N2H3F1S0G0
FUT8 KO	calumenin	Membrane	WT+FUT8 KO	3	NVTYGTYLDDPDPDDGFNYK	33	High-mannosylated	NVTYGTYLDDPDPDDGFNYK-N2H4F0S0G0	N2H4F0S0G0
FUT8 KO	calumenin	Membrane	WT+FUT8 KO	3	NVTYGTYLDDPDPDDGFNYK	33	High-mannosylated	NVTYGTYLDDPDPDDGFNYK-N2H5F0S0G0	N2H5F0S0G0
FUT8 KO	calumenin	Membrane	WT+FUT8 KO	3	NVTYGTYLDDPDPDDGFNYK	33	Fucosylated	NVTYGTYLDDPDPDDGFNYK-N2H5F1S0G0	N2H5F1S0G0
FUT8 KO	calumenin	Membrane	WT+FUT8 KO	3	NVTYGTYLDDPDPDDGFNYK	33	High-mannosylated	NVTYGTYLDDPDPDDGFNYK-N2H6F0S0G0	N2H6F0S0G0
FUT8 KO	calumenin	Membrane	WT+FUT8 KO	3	NVTYGTYLDDPDPDDGFNYK	33	High-mannosylated	NVTYGTYLDDPDPDDGFNYK-N2H7F0S0G0	N2H7F0S0G0
FUT8 KO	calumenin	Membrane	WT+FUT8 KO	3	NVTYGTYLDDPDPDDGFNYK	33	High-mannosylated	NVTYGTYLDDPDPDDGFNYK-N2H8F0S0G0	N2H8F0S0G0
FUT8 KO	calumenin	Membrane	WT+FUT8 KO	3	NVTYGTYLDDPDPDDGFNYK	33	Complex/Hybrid	NVTYGTYLDDPDPDDGFNYK-N3H3F0S0G0	N3H3F0S0G0
FUT8 KO	calumenin	Membrane	WT+FUT8 KO	3	NVTYGTYLDDPDPDDGFNYK	33	Fucosylated	NVTYGTYLDDPDPDDGFNYK-N4H3F1S0G0	N4H3F1S0G0
FUT8 KO	calumenin	Membrane	WT+FUT8 KO	3	NVTYGTYLDDPDPDDGFNYK	33	Fucosylated	NVTYGTYLDDPDPDDGFNYK-N4H4F1S0G0	N4H4F1S0G0
FUT8 KO	calumenin	Membrane	WT+FUT8 KO	3	NVTYGTYLDDPDPDDGFNYK	33	Complex/Hybrid	NVTYGTYLDDPDPDDGFNYK-N4H5F0S0G0	N4H5F0S0G0
FUT8 KO	calumenin	Membrane	WT+FUT8 KO	3	NVTYGTYLDDPDPDDGFNYK	33	Fucosylated	NVTYGTYLDDPDPDDGFNYK-N4H5F1S0G0	N4H5F1S0G0
FUT8 KO	calumenin	Membrane	WT+FUT8 KO	3	NVTYGTYLDDPDPDDGFNYK	33	Fucosylated	NVTYGTYLDDPDPDDGFNYK-N4H5F2S0G0	N4H5F2S0G0
FUT8 KO	calumenin	Membrane	WT+FUT8 KO	3	NVTYGTYLDDPDPDDGFNYK	33	Fucosylated	NVTYGTYLDDPDPDDGFNYK-N4H5F3S0G0	N4H5F3S0G0
FUT8 KO	calumenin	Membrane	WT+FUT8 KO	3	NVTYGTYLDDPDPDDGFNYK	33	Fucosylated	NVTYGTYLDDPDPDDGFNYK-N5H3F1S0G0	N5H3F1S0G0
FUT8 KO	calumenin	Membrane	WT+FUT8 KO	3	NVTYGTYLDDPDPDDGFNYK	33	Complex/Hybrid	NVTYGTYLDDPDPDDGFNYK-N5H4F0S0G0	N5H4F0S0G0
FUT8 KO	calumenin	Membrane	WT+FUT8 KO	3	NVTYGTYLDDPDPDDGFNYK	33	Fucosylated	NVTYGTYLDDPDPDDGFNYK-N5H4F1S0G0	N5H4F1S0G0
FUT8 KO	calumenin	Membrane	WT+FUT8 KO	3	NVTYGTYLDDPDPDDGFNYK	33	Complex/Hybrid	NVTYGTYLDDPDPDDGFNYK-N5H5F0S0G0	N5H5F0S0G0
FUT8 KO	calumenin	Membrane	WT+FUT8 KO	3	NVTYGTYLDDPDPDDGFNYK	33	Complex/Hybrid	NVTYGTYLDDPDPDDGFNYK-N5H6F0S0G0	N5H6F0S0G0
FUT8 KO	calumenin	Membrane	WT+FUT8 KO	3	NVTYGTYLDDPDPDDGFNYK	33	Sialylated	NVTYGTYLDDPDPDDGFNYK-N5H6F0S1G0	N5H6F0S1G0
FUT8 KO	calumenin	Membrane	WT+FUT8 KO	3	NVTYGTYLDDPDPDDGFNYK	33	Fucosylated	NVTYGTYLDDPDPDDGFNYK-N5H6F2S0G0	N5H6F2S0G0
FUT8 KO	calumenin	Membrane	WT+FUT8 KO	3	NVTYGTYLDDPDPDDGFNYK	33	Fucosylated	NVTYGTYLDDPDPDDGFNYK-N5H6F4S0G0	N5H6F4S0G0
FUT8 KO	calumenin	Membrane	WT+FUT8 KO	3	NVTYGTYLDDPDPDDGFNYK	33	Complex/Hybrid	NVTYGTYLDDPDPDDGFNYK-N6H7F0S0G0	N6H7F0S0G0
FUT8 KO	calumenin	Membrane	WT+FUT8 KO	3	NVTYGTYLDDPDPDDGFNYK	33	Complex/Hybrid	NVTYGTYLDDPDPDDGFNYK-N7H7F0S0G0	N7H7F0S0G0
FUT8 KO	calumenin	Membrane	WT+FUT8 KO	3	NVTYGTYLDDPDPDDGFNYK	33	Complex/Hybrid	NVTYGTYLDDPDPDDGFNYK-N7H8F0S0G0	N7H8F0S0G0
FUT8 KO	calumenin	Membrane	WT+FUT8 KO	3	NVTYGTYLDDPDPDDGFNYK	33	Fucosylated	NVTYGTYLDDPDPDDGFNYK-N7H8F2S0G0	N7H8F2S0G0
FUT8 KO	carboxypeptidase D	Membrane	WT+FUT8 KO	7	DLDTDFTSNASQPETK	4	High-mannosylated	DLDTDFTSNASQPETK-N2H8F0S0G0	N2H8F0S0G0
FUT8 KO	carboxypeptidase D	Membrane	WT+FUT8 KO	7	DLDTDFTSNASQPETK	4	High-mannosylated	DLDTDFTSNASQPETK-N2H9F0S0G0	N2H9F0S0G0
FUT8 KO	carboxypeptidase D	Membrane	WT+FUT8 KO	7	DLDTDFTSNASQPETK	4	Fucosylated	DLDTDFTSNASQPETK-N4H5F1S0G0	N4H5F1S0G0
FUT8 KO	carboxypeptidase D	Membrane	WT+FUT8 KO	7	DLDTDFTSNASQPETK	4	Fucosylated	DLDTDFTSNASQPETK-N4H5F2S0G0	N4H5F2S0G0
FUT8 KO	carboxypeptidase D	Membrane	WT+FUT8 KO	7	GILNATLSVAEINHPVTTYK	6	High-mannosylated	GILNATLSVAEINHPVTTYK-N2H5F0S0G0	N2H5F0S0G0
FUT8 KO	carboxypeptidase D	Membrane	WT+FUT8 KO	7	GILNATLSVAEINHPVTTYK	6	High-mannosylated	GILNATLSVAEINHPVTTYK-N2H8F0S0G0	N2H8F0S0G0
FUT8 KO	carboxypeptidase D	Membrane	WT+FUT8 KO	7	GILNATLSVAEINHPVTTYK	6	High-mannosylated	GILNATLSVAEINHPVTTYK-N2H9F0S0G0	N2H9F0S0G0
FUT8 KO	carboxypeptidase D	Membrane	WT+FUT8 KO	7	GILNATLSVAEINHPVTTYK	6	Sialylated	GILNATLSVAEINHPVTTYK-N4H5F0S1G0	N4H5F0S1G0
FUT8 KO	carboxypeptidase D	Membrane	WT+FUT8 KO	7	GILNATLSVAEINHPVTTYK	6	Fucosylated	GILNATLSVAEINHPVTTYK-N4H5F2S0G0	N4H5F2S0G0
FUT8 KO	carboxypeptidase D	Membrane	WT+FUT8 KO	7	GKDLDTDFTSNASQPETK	11	High-mannosylated	GKDLDTDFTSNASQPETK-N2H10F0S0G0	N2H10F0S0G0
FUT8 KO	carboxypeptidase D	Membrane	WT+FUT8 KO	7	GKDLDTDFTSNASQPETK	11	High-mannosylated	GKDLDTDFTSNASQPETK-N2H9F0S0G0	N2H9F0S0G0
FUT8 KO	carboxypeptidase D	Membrane	WT+FUT8 KO	7	GKDLDTDFTSNASQPETK	11	Complex/Hybrid	GKDLDTDFTSNASQPETK-N4H5F0S0G0	N4H5F0S0G0
FUT8 KO	carboxypeptidase D	Membrane	WT+FUT8 KO	7	GKDLDTDFTSNASQPETK	11	Sialylated	GKDLDTDFTSNASQPETK-N4H5F0S1G0	N4H5F0S1G0
FUT8 KO	carboxypeptidase D	Membrane	WT+FUT8 KO	7	GKDLDTDFTSNASQPETK	11	Fucosylated	GKDLDTDFTSNASQPETK-N4H5F1S0G0	N4H5F1S0G0
FUT8 KO	carboxypeptidase D	Membrane	WT+FUT8 KO	7	GKDLDTDFTSNASQPETK	11	Fucosylated	GKDLDTDFTSNASQPETK-N4H5F2S0G0	N4H5F2S0G0
FUT8 KO	carboxypeptidase D	Membrane	WT+FUT8 KO	7	GKDLDTDFTSNASQPETK	11	Fucosylated	GKDLDTDFTSNASQPETK-N4H5F3S0G0	N4H5F3S0G0
FUT8 KO	carboxypeptidase D	Membrane	WT+FUT8 KO	7	GKDLDTDFTSNASQPETK	11	Complex/Hybrid	GKDLDTDFTSNASQPETK-N6H7F0S0G0	N6H7F0S0G0
FUT8 KO	carboxypeptidase D	Membrane	WT+FUT8 KO	7	GLVMNYPHITNLTTLGQSAEYR	2	High-mannosylated	GLVMNYPHITNLTTLGQSAEYR-N2H5F0S0G0	N2H5F0S0G0
FUT8 KO	carboxypeptidase D	Membrane	WT+FUT8 KO	7	GLVMNYPHITNLTTLGQSAEYR	2	High-mannosylated	GLVMNYPHITNLTTLGQSAEYR-N2H9F0S0G0	N2H9F0S0G0
FUT8 KO	carboxypeptidase D	Membrane	WT+FUT8 KO	7	HIWSLEISNKPNVSEPEEPK	8	High-mannosylated	HIWSLEISNKPNVSEPEEPK-N2H8F0S0G0	N2H8F0S0G0
FUT8 KO	carboxypeptidase D	Membrane	WT+FUT8 KO	7	HIWSLEISNKPNVSEPEEPK	8	High-mannosylated	HIWSLEISNKPNVSEPEEPK-N2H9F0S0G0	N2H9F0S0G0
FUT8 KO	carboxypeptidase D	Membrane	WT+FUT8 KO	7	HIWSLEISNKPNVSEPEEPK	8	Complex/Hybrid	HIWSLEISNKPNVSEPEEPK-N4H5F0S0G0	N4H5F0S0G0
FUT8 KO	carboxypeptidase D	Membrane	WT+FUT8 KO	7	HIWSLEISNKPNVSEPEEPK	8	Fucosylated	HIWSLEISNKPNVSEPEEPK-N4H5F2S0G0	N4H5F2S0G0
FUT8 KO	carboxypeptidase D	Membrane	WT+FUT8 KO	7	HIWSLEISNKPNVSEPEEPK	8	Fucosylated	HIWSLEISNKPNVSEPEEPK-N4H5F3S0G0	N4H5F3S0G0
FUT8 KO	carboxypeptidase D	Membrane	WT+FUT8 KO	7	HIWSLEISNKPNVSEPEEPK	8	Fucosylated	HIWSLEISNKPNVSEPEEPK-N5H6F4S0G0	N5H6F4S0G0
FUT8 KO	carboxypeptidase D	Membrane	WT+FUT8 KO	7	HIWSLEISNKPNVSEPEEPK	8	Complex/Hybrid	HIWSLEISNKPNVSEPEEPK-N6H7F0S0G0	N6H7F0S0G0
FUT8 KO	carboxypeptidase D	Membrane	WT+FUT8 KO	7	LLNITDVYLLPSLNPDGFER	8	High-mannosylated	LLNITDVYLLPSLNPDGFER-N2H8F0S0G0	N2H8F0S0G0
FUT8 KO	carboxypeptidase D	Membrane	WT+FUT8 KO	7	LLNITDVYLLPSLNPDGFER	8	High-mannosylated	LLNITDVYLLPSLNPDGFER-N2H9F0S0G0	N2H9F0S0G0
FUT8 KO	carboxypeptidase D	Membrane	WT+FUT8 KO	7	LLNITDVYLLPSLNPDGFER	8	Sialylated	LLNITDVYLLPSLNPDGFER-N4H5F0S2G0	N4H5F0S2G0
FUT8 KO	carboxypeptidase D	Membrane	WT+FUT8 KO	7	LLNITDVYLLPSLNPDGFER	8	Fucosylated	LLNITDVYLLPSLNPDGFER-N4H5F2S0G0	N4H5F2S0G0
FUT8 KO	carboxypeptidase D	Membrane	WT+FUT8 KO	7	LLNITDVYLLPSLNPDGFER	8	Fucosylated	LLNITDVYLLPSLNPDGFER-N4H5F3S0G0	N4H5F3S0G0
FUT8 KO	carboxypeptidase D	Membrane	WT+FUT8 KO	7	LLNITDVYLLPSLNPDGFER	8	Complex/Hybrid	LLNITDVYLLPSLNPDGFER-N6H5F0S0G0	N6H5F0S0G0
FUT8 KO	carboxypeptidase D	Membrane	WT+FUT8 KO	7	LLNITDVYLLPSLNPDGFER	8	Complex/Hybrid	LLNITDVYLLPSLNPDGFER-N6H7F0S0G0	N6H7F0S0G0
FUT8 KO	carboxypeptidase D	Membrane	WT+FUT8 KO	7	SEGAIQVNFTLVR	2	High-mannosylated	SEGAIQVNFTLVR-N2H5F0S0G0	N2H5F0S0G0
FUT8 KO	carboxypeptidase D	Membrane	WT+FUT8 KO	7	SEGAIQVNFTLVR	2	High-mannosylated	SEGAIQVNFTLVR-N2H6F0S0G0	N2H6F0S0G0
FUT8 KO	cartilage-associated protein	Extracellular region	WT+FUT8 KO	2	DKWGLSDEHFQPRPEAVQFVNVTMLQK	4	High-mannosylated	DKWGLSDEHFQPRPEAVQFVNVTMLQK-N2H6F0S0G0	N2H6F0S0G0
FUT8 KO	cartilage-associated protein	Extracellular region	WT+FUT8 KO	2	DKWGLSDEHFQPRPEAVQFVNVTMLQK	4	High-mannosylated	DKWGLSDEHFQPRPEAVQFVNVTMLQK-N2H7F0S0G0	N2H7F0S0G0
FUT8 KO	cartilage-associated protein	Extracellular region	WT+FUT8 KO	2	DKWGLSDEHFQPRPEAVQFVNVTMLQK	4	High-mannosylated	DKWGLSDEHFQPRPEAVQFVNVTMLQK-N2H8F0S0G0	N2H8F0S0G0
FUT8 KO	cartilage-associated protein	Extracellular region	WT+FUT8 KO	2	DKWGLSDEHFQPRPEAVQFVNVTMLQK	4	High-mannosylated	DKWGLSDEHFQPRPEAVQFVNVTMLQK-N2H9F0S0G0	N2H9F0S0G0
FUT8 KO	cartilage-associated protein	Extracellular region	WT+FUT8 KO	2	WGLSDEHFQPRPEAVQFVNVTMLQK	4	High-mannosylated	WGLSDEHFQPRPEAVQFVNVTMLQK-N2H6F0S0G0	N2H6F0S0G0
FUT8 KO	cartilage-associated protein	Extracellular region	WT+FUT8 KO	2	WGLSDEHFQPRPEAVQFVNVTMLQK	4	High-mannosylated	WGLSDEHFQPRPEAVQFVNVTMLQK-N2H7F0S0G0	N2H7F0S0G0
FUT8 KO	cartilage-associated protein	Extracellular region	WT+FUT8 KO	2	WGLSDEHFQPRPEAVQFVNVTMLQK	4	High-mannosylated	WGLSDEHFQPRPEAVQFVNVTMLQK-N2H8F0S0G0	N2H8F0S0G0
FUT8 KO	cartilage-associated protein	Extracellular region	WT+FUT8 KO	2	WGLSDEHFQPRPEAVQFVNVTMLQK	4	High-mannosylated	WGLSDEHFQPRPEAVQFVNVTMLQK-N2H9F0S0G0	N2H9F0S0G0
FUT8 KO	cathepsin D	Lysosome	WT+FUT8 KO	2	NGTSFDIHYGSGSLSGYLSQDTVSVPCK	16	High-mannosylated	NGTSFDIHYGSGSLSGYLSQDTVSVPCK-N2H10F0S0G0	N2H10F0S0G0
FUT8 KO	cathepsin D	Lysosome	WT+FUT8 KO	2	NGTSFDIHYGSGSLSGYLSQDTVSVPCK	16	High-mannosylated	NGTSFDIHYGSGSLSGYLSQDTVSVPCK-N2H3F0S0G0	N2H3F0S0G0
FUT8 KO	cathepsin D	Lysosome	WT+FUT8 KO	2	NGTSFDIHYGSGSLSGYLSQDTVSVPCK	16	Fucosylated	NGTSFDIHYGSGSLSGYLSQDTVSVPCK-N2H3F1S0G0	N2H3F1S0G0
FUT8 KO	cathepsin D	Lysosome	WT+FUT8 KO	2	NGTSFDIHYGSGSLSGYLSQDTVSVPCK	16	High-mannosylated	NGTSFDIHYGSGSLSGYLSQDTVSVPCK-N2H4F0S0G0	N2H4F0S0G0
FUT8 KO	cathepsin D	Lysosome	WT+FUT8 KO	2	NGTSFDIHYGSGSLSGYLSQDTVSVPCK	16	High-mannosylated	NGTSFDIHYGSGSLSGYLSQDTVSVPCK-N2H5F0S0G0	N2H5F0S0G0
FUT8 KO	cathepsin D	Lysosome	WT+FUT8 KO	2	NGTSFDIHYGSGSLSGYLSQDTVSVPCK	16	Fucosylated	NGTSFDIHYGSGSLSGYLSQDTVSVPCK-N2H5F1S0G0	N2H5F1S0G0
FUT8 KO	cathepsin D	Lysosome	WT+FUT8 KO	2	NGTSFDIHYGSGSLSGYLSQDTVSVPCK	16	High-mannosylated	NGTSFDIHYGSGSLSGYLSQDTVSVPCK-N2H6F0S0G0	N2H6F0S0G0
FUT8 KO	cathepsin D	Lysosome	WT+FUT8 KO	2	NGTSFDIHYGSGSLSGYLSQDTVSVPCK	16	High-mannosylated	NGTSFDIHYGSGSLSGYLSQDTVSVPCK-N2H7F0S0G0	N2H7F0S0G0
FUT8 KO	cathepsin D	Lysosome	WT+FUT8 KO	2	NGTSFDIHYGSGSLSGYLSQDTVSVPCK	16	High-mannosylated	NGTSFDIHYGSGSLSGYLSQDTVSVPCK-N2H8F0S0G0	N2H8F0S0G0
FUT8 KO	cathepsin D	Lysosome	WT+FUT8 KO	2	NGTSFDIHYGSGSLSGYLSQDTVSVPCK	16	High-mannosylated	NGTSFDIHYGSGSLSGYLSQDTVSVPCK-N2H9F0S0G0	N2H9F0S0G0
FUT8 KO	cathepsin D	Lysosome	WT+FUT8 KO	2	NGTSFDIHYGSGSLSGYLSQDTVSVPCK	16	Complex/Hybrid	NGTSFDIHYGSGSLSGYLSQDTVSVPCK-N3H3F0S0G0	N3H3F0S0G0
FUT8 KO	cathepsin D	Lysosome	WT+FUT8 KO	2	NGTSFDIHYGSGSLSGYLSQDTVSVPCK	16	Complex/Hybrid	NGTSFDIHYGSGSLSGYLSQDTVSVPCK-N4H5F0S0G0	N4H5F0S0G0
FUT8 KO	cathepsin D	Lysosome	WT+FUT8 KO	2	NGTSFDIHYGSGSLSGYLSQDTVSVPCK	16	Sialylated	NGTSFDIHYGSGSLSGYLSQDTVSVPCK-N4H5F0S1G0	N4H5F0S1G0
FUT8 KO	cathepsin D	Lysosome	WT+FUT8 KO	2	NGTSFDIHYGSGSLSGYLSQDTVSVPCK	16	Fucosylated	NGTSFDIHYGSGSLSGYLSQDTVSVPCK-N4H5F1S0G0	N4H5F1S0G0
FUT8 KO	cathepsin D	Lysosome	WT+FUT8 KO	2	NGTSFDIHYGSGSLSGYLSQDTVSVPCK	16	Fucosylated	NGTSFDIHYGSGSLSGYLSQDTVSVPCK-N4H5F2S0G0	N4H5F2S0G0
FUT8 KO	cathepsin D	Lysosome	WT+FUT8 KO	2	NGTSFDIHYGSGSLSGYLSQDTVSVPCK	16	Complex/Hybrid	NGTSFDIHYGSGSLSGYLSQDTVSVPCK-N6H5F0S0G0	N6H5F0S0G0
FUT8 KO	cathepsin D	Lysosome	WT+FUT8 KO	2	YYEGELSYLNVTR	13	High-mannosylated	YYEGELSYLNVTR-N2H3F0S0G0	N2H3F0S0G0
FUT8 KO	cathepsin D	Lysosome	WT+FUT8 KO	2	YYEGELSYLNVTR	13	High-mannosylated	YYEGELSYLNVTR-N2H4F0S0G0	N2H4F0S0G0
FUT8 KO	cathepsin D	Lysosome	WT+FUT8 KO	2	YYEGELSYLNVTR	13	High-mannosylated	YYEGELSYLNVTR-N2H5F0S0G0	N2H5F0S0G0
FUT8 KO	cathepsin D	Lysosome	WT+FUT8 KO	2	YYEGELSYLNVTR	13	High-mannosylated	YYEGELSYLNVTR-N2H6F0S0G0	N2H6F0S0G0
FUT8 KO	cathepsin D	Lysosome	WT+FUT8 KO	2	YYEGELSYLNVTR	13	High-mannosylated	YYEGELSYLNVTR-N2H7F0S0G0	N2H7F0S0G0
FUT8 KO	cathepsin D	Lysosome	WT+FUT8 KO	2	YYEGELSYLNVTR	13	High-mannosylated	YYEGELSYLNVTR-N2H8F0S0G0	N2H8F0S0G0
FUT8 KO	cathepsin D	Lysosome	WT+FUT8 KO	2	YYEGELSYLNVTR	13	High-mannosylated	YYEGELSYLNVTR-N2H9F0S0G0	N2H9F0S0G0
FUT8 KO	cathepsin D	Lysosome	WT+FUT8 KO	2	YYEGELSYLNVTR	13	Complex/Hybrid	YYEGELSYLNVTR-N3H3F0S0G0	N3H3F0S0G0
FUT8 KO	cathepsin L1	Extracellular region	WT+FUT8 KO	2	FNQTFNAQWHK	5	High-mannosylated	FNQTFNAQWHK-N2H10F0S0G0	N2H10F0S0G0
FUT8 KO	cathepsin L1	Extracellular region	WT+FUT8 KO	2	FNQTFNAQWHK	5	High-mannosylated	FNQTFNAQWHK-N2H6F0S0G0	N2H6F0S0G0
FUT8 KO	cathepsin L1	Extracellular region	WT+FUT8 KO	2	FNQTFNAQWHK	5	High-mannosylated	FNQTFNAQWHK-N2H7F0S0G0	N2H7F0S0G0
FUT8 KO	cathepsin L1	Extracellular region	WT+FUT8 KO	2	FNQTFNAQWHK	5	High-mannosylated	FNQTFNAQWHK-N2H8F0S0G0	N2H8F0S0G0
FUT8 KO	cathepsin L1	Extracellular region	WT+FUT8 KO	2	FNQTFNAQWHK	5	High-mannosylated	FNQTFNAQWHK-N2H9F0S0G0	N2H9F0S0G0
FUT8 KO	cathepsin L1	Extracellular region	WT+FUT8 KO	2	YKPEFAAANDTGYVDIPQLEK	10	High-mannosylated	YKPEFAAANDTGYVDIPQLEK-N2H10F0S0G0	N2H10F0S0G0
FUT8 KO	cathepsin L1	Extracellular region	WT+FUT8 KO	2	YKPEFAAANDTGYVDIPQLEK	10	High-mannosylated	YKPEFAAANDTGYVDIPQLEK-N2H4F0S0G0	N2H4F0S0G0
FUT8 KO	cathepsin L1	Extracellular region	WT+FUT8 KO	2	YKPEFAAANDTGYVDIPQLEK	10	High-mannosylated	YKPEFAAANDTGYVDIPQLEK-N2H5F0S0G0	N2H5F0S0G0
FUT8 KO	cathepsin L1	Extracellular region	WT+FUT8 KO	2	YKPEFAAANDTGYVDIPQLEK	10	Fucosylated	YKPEFAAANDTGYVDIPQLEK-N2H5F1S0G0	N2H5F1S0G0
FUT8 KO	cathepsin L1	Extracellular region	WT+FUT8 KO	2	YKPEFAAANDTGYVDIPQLEK	10	High-mannosylated	YKPEFAAANDTGYVDIPQLEK-N2H6F0S0G0	N2H6F0S0G0
FUT8 KO	cathepsin L1	Extracellular region	WT+FUT8 KO	2	YKPEFAAANDTGYVDIPQLEK	10	High-mannosylated	YKPEFAAANDTGYVDIPQLEK-N2H7F0S0G0	N2H7F0S0G0
FUT8 KO	cathepsin L1	Extracellular region	WT+FUT8 KO	2	YKPEFAAANDTGYVDIPQLEK	10	High-mannosylated	YKPEFAAANDTGYVDIPQLEK-N2H8F0S0G0	N2H8F0S0G0
FUT8 KO	cathepsin L1	Extracellular region	WT+FUT8 KO	2	YKPEFAAANDTGYVDIPQLEK	10	High-mannosylated	YKPEFAAANDTGYVDIPQLEK-N2H9F0S0G0	N2H9F0S0G0
FUT8 KO	cathepsin L1	Extracellular region	WT+FUT8 KO	2	YKPEFAAANDTGYVDIPQLEK	10	Complex/Hybrid	YKPEFAAANDTGYVDIPQLEK-N5H6F0S0G0	N5H6F0S0G0
FUT8 KO	cathepsin L1	Extracellular region	WT+FUT8 KO	2	YKPEFAAANDTGYVDIPQLEK	10	Complex/Hybrid	YKPEFAAANDTGYVDIPQLEK-N6H5F0S0G0	N6H5F0S0G0
FUT8 KO	cation-dependent mannose-6-phosphate receptor	Membrane	WT+FUT8 KO	1	EAGNHSSGAGLVQISK	31	Complex/Hybrid	EAGNHSSGAGLVQISK-N4H5F0S0G0	N4H5F0S0G0
FUT8 KO	cation-dependent mannose-6-phosphate receptor	Membrane	WT+FUT8 KO	1	EAGNHSSGAGLVQISK	31	Fucosylated	EAGNHSSGAGLVQISK-N4H5F1S0G0	N4H5F1S0G0
FUT8 KO	cation-dependent mannose-6-phosphate receptor	Membrane	WT+FUT8 KO	1	EAGNHSSGAGLVQISK	31	Fucosylated	EAGNHSSGAGLVQISK-N4H5F2S0G0	N4H5F2S0G0
FUT8 KO	cation-dependent mannose-6-phosphate receptor	Membrane	WT+FUT8 KO	1	EAGNHSSGAGLVQISK	31	Complex/Hybrid	EAGNHSSGAGLVQISK-N5H6F0S0G0	N5H6F0S0G0
FUT8 KO	cation-dependent mannose-6-phosphate receptor	Membrane	WT+FUT8 KO	1	EAGNHSSGAGLVQISK	31	Fucosylated	EAGNHSSGAGLVQISK-N5H6F2S0G0	N5H6F2S0G0
FUT8 KO	cation-dependent mannose-6-phosphate receptor	Membrane	WT+FUT8 KO	1	EAGNHSSGAGLVQISK	31	Fucosylated	EAGNHSSGAGLVQISK-N5H6F4S0G0	N5H6F4S0G0
FUT8 KO	cation-dependent mannose-6-phosphate receptor	Membrane	WT+FUT8 KO	1	EAGNHSSGAGLVQISK	31	Complex/Hybrid	EAGNHSSGAGLVQISK-N6H7F0S0G0	N6H7F0S0G0
FUT8 KO	cation-dependent mannose-6-phosphate receptor	Membrane	WT+FUT8 KO	1	EAGNHSSGAGLVQISK	31	Sialylated	EAGNHSSGAGLVQISK-N6H7F0S3G0	N6H7F0S3G0
FUT8 KO	cation-dependent mannose-6-phosphate receptor	Membrane	WT+FUT8 KO	1	EAGNHSSGAGLVQISK	31	Fucosylated	EAGNHSSGAGLVQISK-N6H7F2S0G0	N6H7F2S0G0
FUT8 KO	cation-dependent mannose-6-phosphate receptor	Membrane	WT+FUT8 KO	1	EAGNHSSGAGLVQISK	31	Fucosylated	EAGNHSSGAGLVQISK-N6H7F4S0G0	N6H7F4S0G0
FUT8 KO	cation-dependent mannose-6-phosphate receptor	Membrane	WT+FUT8 KO	1	EAGNHSSGAGLVQISK	31	Complex/Hybrid	EAGNHSSGAGLVQISK-N7H8F0S0G0	N7H8F0S0G0
FUT8 KO	cation-dependent mannose-6-phosphate receptor	Membrane	WT+FUT8 KO	1	EAGNHSSGAGLVQISK	31	Sialylated	EAGNHSSGAGLVQISK-N7H8F0S1G0	N7H8F0S1G0
FUT8 KO	cation-dependent mannose-6-phosphate receptor	Membrane	WT+FUT8 KO	1	EAGNHSSGAGLVQISK	31	Fucosylated	EAGNHSSGAGLVQISK-N7H8F2S0G0	N7H8F2S0G0
FUT8 KO	cation-dependent mannose-6-phosphate receptor	Membrane	WT+FUT8 KO	1	EAGNHSSGAGLVQISK	31	Fucosylated	EAGNHSSGAGLVQISK-N7H8F4S0G0	N7H8F4S0G0
FUT8 KO	cation-dependent mannose-6-phosphate receptor	Membrane	WT+FUT8 KO	1	EAGNHSSGAGLVQISK	31	Complex/Hybrid	EAGNHSSGAGLVQISK-N8H9F0S0G0	N8H9F0S0G0
FUT8 KO	cation-dependent mannose-6-phosphate receptor	Membrane	WT+FUT8 KO	1	EAGNHSSGAGLVQISK	31	Sialylated	EAGNHSSGAGLVQISK-N8H9F0S1G0	N8H9F0S1G0
FUT8 KO	cation-dependent mannose-6-phosphate receptor	Membrane	WT+FUT8 KO	1	EAGNHSSGAGLVQISK	31	Fucosylated	EAGNHSSGAGLVQISK-N8H9F4S0G0	N8H9F4S0G0
FUT8 KO	cation-independent mannose-6-phosphate receptor	Membrane	WT+FUT8 KO	17	AACAVRPQEVSMVNGTLTNPVTGR	17	High-mannosylated	AACAVRPQEVSMVNGTLTNPVTGR-N2H6F0S0G0	N2H6F0S0G0
FUT8 KO	cation-independent mannose-6-phosphate receptor	Membrane	WT+FUT8 KO	17	AACAVRPQEVSMVNGTLTNPVTGR	17	High-mannosylated	AACAVRPQEVSMVNGTLTNPVTGR-N2H8F0S0G0	N2H8F0S0G0
FUT8 KO	cation-independent mannose-6-phosphate receptor	Membrane	WT+FUT8 KO	17	AACAVRPQEVSMVNGTLTNPVTGR	17	High-mannosylated	AACAVRPQEVSMVNGTLTNPVTGR-N2H9F0S0G0	N2H9F0S0G0
FUT8 KO	cation-independent mannose-6-phosphate receptor	Membrane	WT+FUT8 KO	17	AACAVRPQEVSMVNGTLTNPVTGR	17	Complex/Hybrid	AACAVRPQEVSMVNGTLTNPVTGR-N4H5F0S0G0	N4H5F0S0G0
FUT8 KO	cation-independent mannose-6-phosphate receptor	Membrane	WT+FUT8 KO	17	AACAVRPQEVSMVNGTLTNPVTGR	17	Fucosylated	AACAVRPQEVSMVNGTLTNPVTGR-N4H5F2S0G0	N4H5F2S0G0
FUT8 KO	cation-independent mannose-6-phosphate receptor	Membrane	WT+FUT8 KO	17	AACAVRPQEVSMVNGTLTNPVTGR	17	Sialylated	AACAVRPQEVSMVNGTLTNPVTGR-N5H6F0S2G0	N5H6F0S2G0
FUT8 KO	cation-independent mannose-6-phosphate receptor	Membrane	WT+FUT8 KO	17	AACAVRPQEVSMVNGTLTNPVTGR	17	Fucosylated	AACAVRPQEVSMVNGTLTNPVTGR-N5H6F2S0G0	N5H6F2S0G0
FUT8 KO	cation-independent mannose-6-phosphate receptor	Membrane	WT+FUT8 KO	17	AACAVRPQEVSMVNGTLTNPVTGR	17	Fucosylated	AACAVRPQEVSMVNGTLTNPVTGR-N5H6F4S0G0	N5H6F4S0G0
FUT8 KO	cation-independent mannose-6-phosphate receptor	Membrane	WT+FUT8 KO	17	AACAVRPQEVSMVNGTLTNPVTGR	17	Complex/Hybrid	AACAVRPQEVSMVNGTLTNPVTGR-N6H5F0S0G0	N6H5F0S0G0
FUT8 KO	cation-independent mannose-6-phosphate receptor	Membrane	WT+FUT8 KO	17	AACAVRPQEVSMVNGTLTNPVTGR	17	Complex/Hybrid	AACAVRPQEVSMVNGTLTNPVTGR-N6H7F0S0G0	N6H7F0S0G0
FUT8 KO	cation-independent mannose-6-phosphate receptor	Membrane	WT+FUT8 KO	17	AACAVRPQEVSMVNGTLTNPVTGR	17	Complex/Hybrid	AACAVRPQEVSMVNGTLTNPVTGR-N7H8F0S0G0	N7H8F0S0G0
FUT8 KO	cation-independent mannose-6-phosphate receptor	Membrane	WT+FUT8 KO	17	DAGVGFPEYQEEDNSTYNFR	22	High-mannosylated	DAGVGFPEYQEEDNSTYNFR-N2H3F0S0G0	N2H3F0S0G0
FUT8 KO	cation-independent mannose-6-phosphate receptor	Membrane	WT+FUT8 KO	17	DAGVGFPEYQEEDNSTYNFR	22	High-mannosylated	DAGVGFPEYQEEDNSTYNFR-N2H5F0S0G0	N2H5F0S0G0
FUT8 KO	cation-independent mannose-6-phosphate receptor	Membrane	WT+FUT8 KO	17	DAGVGFPEYQEEDNSTYNFR	22	High-mannosylated	DAGVGFPEYQEEDNSTYNFR-N2H6F0S0G0	N2H6F0S0G0
FUT8 KO	cation-independent mannose-6-phosphate receptor	Membrane	WT+FUT8 KO	17	DAGVGFPEYQEEDNSTYNFR	22	High-mannosylated	DAGVGFPEYQEEDNSTYNFR-N2H7F0S0G0	N2H7F0S0G0
FUT8 KO	cation-independent mannose-6-phosphate receptor	Membrane	WT+FUT8 KO	17	DAGVGFPEYQEEDNSTYNFR	22	High-mannosylated	DAGVGFPEYQEEDNSTYNFR-N2H8F0S0G0	N2H8F0S0G0
FUT8 KO	cation-independent mannose-6-phosphate receptor	Membrane	WT+FUT8 KO	17	DAGVGFPEYQEEDNSTYNFR	22	High-mannosylated	DAGVGFPEYQEEDNSTYNFR-N2H9F0S0G0	N2H9F0S0G0
FUT8 KO	cation-independent mannose-6-phosphate receptor	Membrane	WT+FUT8 KO	17	DAGVGFPEYQEEDNSTYNFR	22	Complex/Hybrid	DAGVGFPEYQEEDNSTYNFR-N3H3F0S0G0	N3H3F0S0G0
FUT8 KO	cation-independent mannose-6-phosphate receptor	Membrane	WT+FUT8 KO	17	DAGVGFPEYQEEDNSTYNFR	22	Complex/Hybrid	DAGVGFPEYQEEDNSTYNFR-N4H5F0S0G0	N4H5F0S0G0
FUT8 KO	cation-independent mannose-6-phosphate receptor	Membrane	WT+FUT8 KO	17	DAGVGFPEYQEEDNSTYNFR	22	Sialylated	DAGVGFPEYQEEDNSTYNFR-N4H5F0S1G0	N4H5F0S1G0
FUT8 KO	cation-independent mannose-6-phosphate receptor	Membrane	WT+FUT8 KO	17	DAGVGFPEYQEEDNSTYNFR	22	Sialylated	DAGVGFPEYQEEDNSTYNFR-N4H5F0S2G0	N4H5F0S2G0
FUT8 KO	cation-independent mannose-6-phosphate receptor	Membrane	WT+FUT8 KO	17	DAGVGFPEYQEEDNSTYNFR	22	Complex/Hybrid	DAGVGFPEYQEEDNSTYNFR-N5H6F0S0G0	N5H6F0S0G0
FUT8 KO	cation-independent mannose-6-phosphate receptor	Membrane	WT+FUT8 KO	17	DAGVGFPEYQEEDNSTYNFR	22	Sialylated	DAGVGFPEYQEEDNSTYNFR-N5H6F0S2G0	N5H6F0S2G0
FUT8 KO	cation-independent mannose-6-phosphate receptor	Membrane	WT+FUT8 KO	17	DAGVGFPEYQEEDNSTYNFR	22	Complex/Hybrid	DAGVGFPEYQEEDNSTYNFR-N6H5F0S0G0	N6H5F0S0G0
FUT8 KO	cation-independent mannose-6-phosphate receptor	Membrane	WT+FUT8 KO	17	DAGVGFPEYQEEDNSTYNFR	22	Complex/Hybrid	DAGVGFPEYQEEDNSTYNFR-N6H7F0S0G0	N6H7F0S0G0
FUT8 KO	cation-independent mannose-6-phosphate receptor	Membrane	WT+FUT8 KO	17	DPNSGFVFNLSPLNR	5	High-mannosylated	DPNSGFVFNLSPLNR-N2H9F0S0G0	N2H9F0S0G0
FUT8 KO	cation-independent mannose-6-phosphate receptor	Membrane	WT+FUT8 KO	17	DPNSGFVFNLSPLNR	5	Complex/Hybrid	DPNSGFVFNLSPLNR-N4H5F0S0G0	N4H5F0S0G0
FUT8 KO	cation-independent mannose-6-phosphate receptor	Membrane	WT+FUT8 KO	17	DPNSGFVFNLSPLNR	5	Sialylated	DPNSGFVFNLSPLNR-N4H5F0S1G0	N4H5F0S1G0
FUT8 KO	cation-independent mannose-6-phosphate receptor	Membrane	WT+FUT8 KO	17	DPNSGFVFNLSPLNR	5	Fucosylated	DPNSGFVFNLSPLNR-N4H5F2S0G0	N4H5F2S0G0
FUT8 KO	cation-independent mannose-6-phosphate receptor	Membrane	WT+FUT8 KO	17	GLNLGVVQISPQADANGSLSILYVNGDK	3	Complex/Hybrid	GLNLGVVQISPQADANGSLSILYVNGDK-N6H7F0S0G0	N6H7F0S0G0
FUT8 KO	cation-independent mannose-6-phosphate receptor	Membrane	WT+FUT8 KO	17	GLNLGVVQISPQADANGSLSILYVNGDK	3	Sialylated	GLNLGVVQISPQADANGSLSILYVNGDK-N7H8F0S1G0	N7H8F0S1G0
FUT8 KO	cation-independent mannose-6-phosphate receptor	Membrane	WT+FUT8 KO	17	GLNLGVVQISPQADANGSLSILYVNGDK	3	Fucosylated	GLNLGVVQISPQADANGSLSILYVNGDK-N7H8F2S0G0	N7H8F2S0G0
FUT8 KO	cation-independent mannose-6-phosphate receptor	Membrane	WT+FUT8 KO	17	HMNYTSLIAFHCK	6	High-mannosylated	HMNYTSLIAFHCK-N2H6F0S0G0	N2H6F0S0G0
FUT8 KO	cation-independent mannose-6-phosphate receptor	Membrane	WT+FUT8 KO	17	HMNYTSLIAFHCK	6	Sialylated	HMNYTSLIAFHCK-N4H5F0S2G0	N4H5F0S2G0
FUT8 KO	cation-independent mannose-6-phosphate receptor	Membrane	WT+FUT8 KO	17	HMNYTSLIAFHCK	6	Fucosylated	HMNYTSLIAFHCK-N4H5F2S0G0	N4H5F2S0G0
FUT8 KO	cation-independent mannose-6-phosphate receptor	Membrane	WT+FUT8 KO	17	HMNYTSLIAFHCK	6	Fucosylated	HMNYTSLIAFHCK-N4H5F3S0G0	N4H5F3S0G0
FUT8 KO	cation-independent mannose-6-phosphate receptor	Membrane	WT+FUT8 KO	17	HMNYTSLIAFHCK	6	Complex/Hybrid	HMNYTSLIAFHCK-N6H7F0S0G0	N6H7F0S0G0
FUT8 KO	cation-independent mannose-6-phosphate receptor	Membrane	WT+FUT8 KO	17	ITTNITLVCKPGDLESAPVLR	17	High-mannosylated	ITTNITLVCKPGDLESAPVLR-N2H10F0S0G0	N2H10F0S0G0
FUT8 KO	cation-independent mannose-6-phosphate receptor	Membrane	WT+FUT8 KO	17	ITTNITLVCKPGDLESAPVLR	17	High-mannosylated	ITTNITLVCKPGDLESAPVLR-N2H5F0S0G0	N2H5F0S0G0
FUT8 KO	cation-independent mannose-6-phosphate receptor	Membrane	WT+FUT8 KO	17	ITTNITLVCKPGDLESAPVLR	17	High-mannosylated	ITTNITLVCKPGDLESAPVLR-N2H6F0S0G0	N2H6F0S0G0
FUT8 KO	cation-independent mannose-6-phosphate receptor	Membrane	WT+FUT8 KO	17	ITTNITLVCKPGDLESAPVLR	17	High-mannosylated	ITTNITLVCKPGDLESAPVLR-N2H7F0S0G0	N2H7F0S0G0
FUT8 KO	cation-independent mannose-6-phosphate receptor	Membrane	WT+FUT8 KO	17	ITTNITLVCKPGDLESAPVLR	17	High-mannosylated	ITTNITLVCKPGDLESAPVLR-N2H8F0S0G0	N2H8F0S0G0
FUT8 KO	cation-independent mannose-6-phosphate receptor	Membrane	WT+FUT8 KO	17	ITTNITLVCKPGDLESAPVLR	17	High-mannosylated	ITTNITLVCKPGDLESAPVLR-N2H9F0S0G0	N2H9F0S0G0
FUT8 KO	cation-independent mannose-6-phosphate receptor	Membrane	WT+FUT8 KO	17	ITTNITLVCKPGDLESAPVLR	17	Complex/Hybrid	ITTNITLVCKPGDLESAPVLR-N4H5F0S0G0	N4H5F0S0G0
FUT8 KO	cation-independent mannose-6-phosphate receptor	Membrane	WT+FUT8 KO	17	ITTNITLVCKPGDLESAPVLR	17	Sialylated	ITTNITLVCKPGDLESAPVLR-N4H5F0S1G0	N4H5F0S1G0
FUT8 KO	cation-independent mannose-6-phosphate receptor	Membrane	WT+FUT8 KO	17	ITTNITLVCKPGDLESAPVLR	17	Sialylated	ITTNITLVCKPGDLESAPVLR-N4H5F0S2G0	N4H5F0S2G0
FUT8 KO	cation-independent mannose-6-phosphate receptor	Membrane	WT+FUT8 KO	17	ITTNITLVCKPGDLESAPVLR	17	Fucosylated	ITTNITLVCKPGDLESAPVLR-N4H5F2S0G0	N4H5F2S0G0
FUT8 KO	cation-independent mannose-6-phosphate receptor	Membrane	WT+FUT8 KO	17	ITTNITLVCKPGDLESAPVLR	17	Fucosylated	ITTNITLVCKPGDLESAPVLR-N5H5F1S0G0	N5H5F1S0G0
FUT8 KO	cation-independent mannose-6-phosphate receptor	Membrane	WT+FUT8 KO	17	ITTNITLVCKPGDLESAPVLR	17	Complex/Hybrid	ITTNITLVCKPGDLESAPVLR-N5H6F0S0G0	N5H6F0S0G0
FUT8 KO	cation-independent mannose-6-phosphate receptor	Membrane	WT+FUT8 KO	17	ITTNITLVCKPGDLESAPVLR	17	Sialylated	ITTNITLVCKPGDLESAPVLR-N5H6F0S1G0	N5H6F0S1G0
FUT8 KO	cation-independent mannose-6-phosphate receptor	Membrane	WT+FUT8 KO	17	ITTNITLVCKPGDLESAPVLR	17	Fucosylated	ITTNITLVCKPGDLESAPVLR-N5H6F2S0G0	N5H6F2S0G0
FUT8 KO	cation-independent mannose-6-phosphate receptor	Membrane	WT+FUT8 KO	17	ITTNITLVCKPGDLESAPVLR	17	Fucosylated	ITTNITLVCKPGDLESAPVLR-N5H6F4S0G0	N5H6F4S0G0
FUT8 KO	cation-independent mannose-6-phosphate receptor	Membrane	WT+FUT8 KO	17	ITTNITLVCKPGDLESAPVLR	17	Complex/Hybrid	ITTNITLVCKPGDLESAPVLR-N6H5F0S0G0	N6H5F0S0G0
FUT8 KO	cation-independent mannose-6-phosphate receptor	Membrane	WT+FUT8 KO	17	KITTNITLVCKPGDLESAPVLR	8	High-mannosylated	KITTNITLVCKPGDLESAPVLR-N2H7F0S0G0	N2H7F0S0G0
FUT8 KO	cation-independent mannose-6-phosphate receptor	Membrane	WT+FUT8 KO	17	KITTNITLVCKPGDLESAPVLR	8	High-mannosylated	KITTNITLVCKPGDLESAPVLR-N2H8F0S0G0	N2H8F0S0G0
FUT8 KO	cation-independent mannose-6-phosphate receptor	Membrane	WT+FUT8 KO	17	KITTNITLVCKPGDLESAPVLR	8	High-mannosylated	KITTNITLVCKPGDLESAPVLR-N2H9F0S0G0	N2H9F0S0G0
FUT8 KO	cation-independent mannose-6-phosphate receptor	Membrane	WT+FUT8 KO	17	KITTNITLVCKPGDLESAPVLR	8	Complex/Hybrid	KITTNITLVCKPGDLESAPVLR-N4H5F0S0G0	N4H5F0S0G0
FUT8 KO	cation-independent mannose-6-phosphate receptor	Membrane	WT+FUT8 KO	17	KITTNITLVCKPGDLESAPVLR	8	Sialylated	KITTNITLVCKPGDLESAPVLR-N4H5F0S1G0	N4H5F0S1G0
FUT8 KO	cation-independent mannose-6-phosphate receptor	Membrane	WT+FUT8 KO	17	KITTNITLVCKPGDLESAPVLR	8	Fucosylated	KITTNITLVCKPGDLESAPVLR-N4H5F2S0G0	N4H5F2S0G0
FUT8 KO	cation-independent mannose-6-phosphate receptor	Membrane	WT+FUT8 KO	17	KITTNITLVCKPGDLESAPVLR	8	Complex/Hybrid	KITTNITLVCKPGDLESAPVLR-N5H6F0S0G0	N5H6F0S0G0
FUT8 KO	cation-independent mannose-6-phosphate receptor	Membrane	WT+FUT8 KO	17	KITTNITLVCKPGDLESAPVLR	8	Fucosylated	KITTNITLVCKPGDLESAPVLR-N5H6F2S0G0	N5H6F2S0G0
FUT8 KO	cation-independent mannose-6-phosphate receptor	Membrane	WT+FUT8 KO	17	MNYTGGDTCHQVYQR	7	High-mannosylated	MNYTGGDTCHQVYQR-N2H10F0S0G0	N2H10F0S0G0
FUT8 KO	cation-independent mannose-6-phosphate receptor	Membrane	WT+FUT8 KO	17	MNYTGGDTCHQVYQR	7	High-mannosylated	MNYTGGDTCHQVYQR-N2H5F0S0G0	N2H5F0S0G0
FUT8 KO	cation-independent mannose-6-phosphate receptor	Membrane	WT+FUT8 KO	17	MNYTGGDTCHQVYQR	7	High-mannosylated	MNYTGGDTCHQVYQR-N2H6F0S0G0	N2H6F0S0G0
FUT8 KO	cation-independent mannose-6-phosphate receptor	Membrane	WT+FUT8 KO	17	MNYTGGDTCHQVYQR	7	High-mannosylated	MNYTGGDTCHQVYQR-N2H7F0S0G0	N2H7F0S0G0
FUT8 KO	cation-independent mannose-6-phosphate receptor	Membrane	WT+FUT8 KO	17	MNYTGGDTCHQVYQR	7	High-mannosylated	MNYTGGDTCHQVYQR-N2H8F0S0G0	N2H8F0S0G0
FUT8 KO	cation-independent mannose-6-phosphate receptor	Membrane	WT+FUT8 KO	17	MNYTGGDTCHQVYQR	7	High-mannosylated	MNYTGGDTCHQVYQR-N2H9F0S0G0	N2H9F0S0G0
FUT8 KO	cation-independent mannose-6-phosphate receptor	Membrane	WT+FUT8 KO	17	MNYTGGDTCHQVYQR	7	Complex/Hybrid	MNYTGGDTCHQVYQR-N6H5F0S0G0	N6H5F0S0G0
FUT8 KO	cation-independent mannose-6-phosphate receptor	Membrane	WT+FUT8 KO	17	MSVINFECNK	19	High-mannosylated	MSVINFECNK-N2H10F0S0G0	N2H10F0S0G0
FUT8 KO	cation-independent mannose-6-phosphate receptor	Membrane	WT+FUT8 KO	17	MSVINFECNK	19	High-mannosylated	MSVINFECNK-N2H8F0S0G0	N2H8F0S0G0
FUT8 KO	cation-independent mannose-6-phosphate receptor	Membrane	WT+FUT8 KO	17	MSVINFECNK	19	High-mannosylated	MSVINFECNK-N2H9F0S0G0	N2H9F0S0G0
FUT8 KO	cation-independent mannose-6-phosphate receptor	Membrane	WT+FUT8 KO	17	MSVINFECNK	19	Sialylated	MSVINFECNK-N4H5F0S1G0	N4H5F0S1G0
FUT8 KO	cation-independent mannose-6-phosphate receptor	Membrane	WT+FUT8 KO	17	MSVINFECNK	19	Sialylated	MSVINFECNK-N4H5F0S2G0	N4H5F0S2G0
FUT8 KO	cation-independent mannose-6-phosphate receptor	Membrane	WT+FUT8 KO	17	MSVINFECNK	19	Fucosylated	MSVINFECNK-N4H5F1S0G0	N4H5F1S0G0
FUT8 KO	cation-independent mannose-6-phosphate receptor	Membrane	WT+FUT8 KO	17	MSVINFECNK	19	Fucosylated	MSVINFECNK-N4H5F2S0G0	N4H5F2S0G0
FUT8 KO	cation-independent mannose-6-phosphate receptor	Membrane	WT+FUT8 KO	17	MSVINFECNK	19	Fucosylated	MSVINFECNK-N4H5F3S0G0	N4H5F3S0G0
FUT8 KO	cation-independent mannose-6-phosphate receptor	Membrane	WT+FUT8 KO	17	MSVINFECNK	19	Complex/Hybrid	MSVINFECNK-N5H6F0S0G0	N5H6F0S0G0
FUT8 KO	cation-independent mannose-6-phosphate receptor	Membrane	WT+FUT8 KO	17	MSVINFECNK	19	Sialylated	MSVINFECNK-N5H6F0S1G0	N5H6F0S1G0
FUT8 KO	cation-independent mannose-6-phosphate receptor	Membrane	WT+FUT8 KO	17	MSVINFECNK	19	Fucosylated	MSVINFECNK-N5H6F2S0G0	N5H6F2S0G0
FUT8 KO	cation-independent mannose-6-phosphate receptor	Membrane	WT+FUT8 KO	17	MSVINFECNK	19	Fucosylated	MSVINFECNK-N5H6F3S0G0	N5H6F3S0G0
FUT8 KO	cation-independent mannose-6-phosphate receptor	Membrane	WT+FUT8 KO	17	MSVINFECNK	19	Complex/Hybrid	MSVINFECNK-N7H8F0S0G0	N7H8F0S0G0
FUT8 KO	cation-independent mannose-6-phosphate receptor	Membrane	WT+FUT8 KO	17	MSVINFECNK	19	Sialylated	MSVINFECNK-N7H8F0S1G0	N7H8F0S1G0
FUT8 KO	cation-independent mannose-6-phosphate receptor	Membrane	WT+FUT8 KO	17	NGSSIIDLSPLIHR	30	High-mannosylated	NGSSIIDLSPLIHR-N2H10F0S0G0	N2H10F0S0G0
FUT8 KO	cation-independent mannose-6-phosphate receptor	Membrane	WT+FUT8 KO	17	NGSSIIDLSPLIHR	30	High-mannosylated	NGSSIIDLSPLIHR-N2H5F0S0G0	N2H5F0S0G0
FUT8 KO	cation-independent mannose-6-phosphate receptor	Membrane	WT+FUT8 KO	17	NGSSIIDLSPLIHR	30	Fucosylated	NGSSIIDLSPLIHR-N2H5F1S0G0	N2H5F1S0G0
FUT8 KO	cation-independent mannose-6-phosphate receptor	Membrane	WT+FUT8 KO	17	NGSSIIDLSPLIHR	30	High-mannosylated	NGSSIIDLSPLIHR-N2H6F0S0G0	N2H6F0S0G0
FUT8 KO	cation-independent mannose-6-phosphate receptor	Membrane	WT+FUT8 KO	17	NGSSIIDLSPLIHR	30	High-mannosylated	NGSSIIDLSPLIHR-N2H7F0S0G0	N2H7F0S0G0
FUT8 KO	cation-independent mannose-6-phosphate receptor	Membrane	WT+FUT8 KO	17	NGSSIIDLSPLIHR	30	High-mannosylated	NGSSIIDLSPLIHR-N2H8F0S0G0	N2H8F0S0G0
FUT8 KO	cation-independent mannose-6-phosphate receptor	Membrane	WT+FUT8 KO	17	NGSSIIDLSPLIHR	30	High-mannosylated	NGSSIIDLSPLIHR-N2H9F0S0G0	N2H9F0S0G0
FUT8 KO	cation-independent mannose-6-phosphate receptor	Membrane	WT+FUT8 KO	17	NGSSIIDLSPLIHR	30	Complex/Hybrid	NGSSIIDLSPLIHR-N3H3F0S0G0	N3H3F0S0G0
FUT8 KO	cation-independent mannose-6-phosphate receptor	Membrane	WT+FUT8 KO	17	NGSSIIDLSPLIHR	30	Complex/Hybrid	NGSSIIDLSPLIHR-N4H5F0S0G0	N4H5F0S0G0
FUT8 KO	cation-independent mannose-6-phosphate receptor	Membrane	WT+FUT8 KO	17	NGSSIIDLSPLIHR	30	Sialylated	NGSSIIDLSPLIHR-N4H5F0S1G0	N4H5F0S1G0
FUT8 KO	cation-independent mannose-6-phosphate receptor	Membrane	WT+FUT8 KO	17	NGSSIIDLSPLIHR	30	Sialylated	NGSSIIDLSPLIHR-N4H5F0S2G0	N4H5F0S2G0
FUT8 KO	cation-independent mannose-6-phosphate receptor	Membrane	WT+FUT8 KO	17	NGSSIIDLSPLIHR	30	Fucosylated	NGSSIIDLSPLIHR-N4H5F2S0G0	N4H5F2S0G0
FUT8 KO	cation-independent mannose-6-phosphate receptor	Membrane	WT+FUT8 KO	17	NGSSIIDLSPLIHR	30	Fucosylated	NGSSIIDLSPLIHR-N5H6F2S0G0	N5H6F2S0G0
FUT8 KO	cation-independent mannose-6-phosphate receptor	Membrane	WT+FUT8 KO	17	NGSSIIDLSPLIHR	30	Fucosylated	NGSSIIDLSPLIHR-N5H6F4S0G0	N5H6F4S0G0
FUT8 KO	cation-independent mannose-6-phosphate receptor	Membrane	WT+FUT8 KO	17	NGSSIIDLSPLIHR	30	Complex/Hybrid	NGSSIIDLSPLIHR-N6H5F0S0G0	N6H5F0S0G0
FUT8 KO	cation-independent mannose-6-phosphate receptor	Membrane	WT+FUT8 KO	17	NGSSIIDLSPLIHR	30	Complex/Hybrid	NGSSIIDLSPLIHR-N6H7F0S0G0	N6H7F0S0G0
FUT8 KO	cation-independent mannose-6-phosphate receptor	Membrane	WT+FUT8 KO	17	NGSSIIDLSPLIHR	30	Complex/Hybrid	NGSSIIDLSPLIHR-N7H8F0S0G0	N7H8F0S0G0
FUT8 KO	cation-independent mannose-6-phosphate receptor	Membrane	WT+FUT8 KO	17	NGSSIIDLSPLIHR	30	Sialylated	NGSSIIDLSPLIHR-N7H8F0S1G0	N7H8F0S1G0
FUT8 KO	cation-independent mannose-6-phosphate receptor	Membrane	WT+FUT8 KO	17	NGSSIIDLSPLIHR	30	Fucosylated	NGSSIIDLSPLIHR-N7H8F1S0G0	N7H8F1S0G0
FUT8 KO	cation-independent mannose-6-phosphate receptor	Membrane	WT+FUT8 KO	17	NSTHDDCQVTNPSTGHLFDLSSLSGK	28	High-mannosylated	NSTHDDCQVTNPSTGHLFDLSSLSGK-N2H10F0S0G0	N2H10F0S0G0
FUT8 KO	cation-independent mannose-6-phosphate receptor	Membrane	WT+FUT8 KO	17	NSTHDDCQVTNPSTGHLFDLSSLSGK	28	High-mannosylated	NSTHDDCQVTNPSTGHLFDLSSLSGK-N2H3F0S0G0	N2H3F0S0G0
FUT8 KO	cation-independent mannose-6-phosphate receptor	Membrane	WT+FUT8 KO	17	NSTHDDCQVTNPSTGHLFDLSSLSGK	28	High-mannosylated	NSTHDDCQVTNPSTGHLFDLSSLSGK-N2H6F0S0G0	N2H6F0S0G0
FUT8 KO	cation-independent mannose-6-phosphate receptor	Membrane	WT+FUT8 KO	17	NSTHDDCQVTNPSTGHLFDLSSLSGK	28	High-mannosylated	NSTHDDCQVTNPSTGHLFDLSSLSGK-N2H7F0S0G0	N2H7F0S0G0
FUT8 KO	cation-independent mannose-6-phosphate receptor	Membrane	WT+FUT8 KO	17	NSTHDDCQVTNPSTGHLFDLSSLSGK	28	High-mannosylated	NSTHDDCQVTNPSTGHLFDLSSLSGK-N2H8F0S0G0	N2H8F0S0G0
FUT8 KO	cation-independent mannose-6-phosphate receptor	Membrane	WT+FUT8 KO	17	NSTHDDCQVTNPSTGHLFDLSSLSGK	28	High-mannosylated	NSTHDDCQVTNPSTGHLFDLSSLSGK-N2H9F0S0G0	N2H9F0S0G0
FUT8 KO	cation-independent mannose-6-phosphate receptor	Membrane	WT+FUT8 KO	17	NSTHDDCQVTNPSTGHLFDLSSLSGK	28	Complex/Hybrid	NSTHDDCQVTNPSTGHLFDLSSLSGK-N4H5F0S0G0	N4H5F0S0G0
FUT8 KO	cation-independent mannose-6-phosphate receptor	Membrane	WT+FUT8 KO	17	NSTHDDCQVTNPSTGHLFDLSSLSGK	28	Sialylated	NSTHDDCQVTNPSTGHLFDLSSLSGK-N4H5F0S1G0	N4H5F0S1G0
FUT8 KO	cation-independent mannose-6-phosphate receptor	Membrane	WT+FUT8 KO	17	NSTHDDCQVTNPSTGHLFDLSSLSGK	28	Fucosylated	NSTHDDCQVTNPSTGHLFDLSSLSGK-N4H5F1S0G0	N4H5F1S0G0
FUT8 KO	cation-independent mannose-6-phosphate receptor	Membrane	WT+FUT8 KO	17	NSTHDDCQVTNPSTGHLFDLSSLSGK	28	Fucosylated	NSTHDDCQVTNPSTGHLFDLSSLSGK-N4H5F2S0G0	N4H5F2S0G0
FUT8 KO	cation-independent mannose-6-phosphate receptor	Membrane	WT+FUT8 KO	17	NSTHDDCQVTNPSTGHLFDLSSLSGK	28	Fucosylated	NSTHDDCQVTNPSTGHLFDLSSLSGK-N4H5F3S0G0	N4H5F3S0G0
FUT8 KO	cation-independent mannose-6-phosphate receptor	Membrane	WT+FUT8 KO	17	NSTHDDCQVTNPSTGHLFDLSSLSGK	28	Fucosylated	NSTHDDCQVTNPSTGHLFDLSSLSGK-N5H6F1S0G0	N5H6F1S0G0
FUT8 KO	cation-independent mannose-6-phosphate receptor	Membrane	WT+FUT8 KO	17	NSTHDDCQVTNPSTGHLFDLSSLSGK	28	Fucosylated	NSTHDDCQVTNPSTGHLFDLSSLSGK-N5H6F2S0G0	N5H6F2S0G0
FUT8 KO	cation-independent mannose-6-phosphate receptor	Membrane	WT+FUT8 KO	17	NSTHDDCQVTNPSTGHLFDLSSLSGK	28	Fucosylated	NSTHDDCQVTNPSTGHLFDLSSLSGK-N5H6F3S0G0	N5H6F3S0G0
FUT8 KO	cation-independent mannose-6-phosphate receptor	Membrane	WT+FUT8 KO	17	NSTHDDCQVTNPSTGHLFDLSSLSGK	28	Fucosylated	NSTHDDCQVTNPSTGHLFDLSSLSGK-N5H6F4S0G0	N5H6F4S0G0
FUT8 KO	cation-independent mannose-6-phosphate receptor	Membrane	WT+FUT8 KO	17	NSTHDDCQVTNPSTGHLFDLSSLSGK	28	Complex/Hybrid	NSTHDDCQVTNPSTGHLFDLSSLSGK-N6H5F0S0G0	N6H5F0S0G0
FUT8 KO	cation-independent mannose-6-phosphate receptor	Membrane	WT+FUT8 KO	17	NSTHDDCQVTNPSTGHLFDLSSLSGK	28	Complex/Hybrid	NSTHDDCQVTNPSTGHLFDLSSLSGK-N6H7F0S0G0	N6H7F0S0G0
FUT8 KO	cation-independent mannose-6-phosphate receptor	Membrane	WT+FUT8 KO	17	NSTHDDCQVTNPSTGHLFDLSSLSGK	28	Fucosylated	NSTHDDCQVTNPSTGHLFDLSSLSGK-N6H7F4S0G0	N6H7F4S0G0
FUT8 KO	cation-independent mannose-6-phosphate receptor	Membrane	WT+FUT8 KO	17	NSTHDDCQVTNPSTGHLFDLSSLSGK	28	Complex/Hybrid	NSTHDDCQVTNPSTGHLFDLSSLSGK-N7H8F0S0G0	N7H8F0S0G0
FUT8 KO	cation-independent mannose-6-phosphate receptor	Membrane	WT+FUT8 KO	17	NSTHDDCQVTNPSTGHLFDLSSLSGK	28	Fucosylated	NSTHDDCQVTNPSTGHLFDLSSLSGK-N7H8F1S0G0	N7H8F1S0G0
FUT8 KO	cation-independent mannose-6-phosphate receptor	Membrane	WT+FUT8 KO	17	NSTHDDCQVTNPSTGHLFDLSSLSGK	28	Fucosylated	NSTHDDCQVTNPSTGHLFDLSSLSGK-N7H8F2S0G0	N7H8F2S0G0
FUT8 KO	cation-independent mannose-6-phosphate receptor	Membrane	WT+FUT8 KO	17	NSTHDDCQVTNPSTGHLFDLSSLSGK	28	Complex/Hybrid	NSTHDDCQVTNPSTGHLFDLSSLSGK-N8H9F0S0G0	N8H9F0S0G0
FUT8 KO	cation-independent mannose-6-phosphate receptor	Membrane	WT+FUT8 KO	17	NSTHDDCQVTNPSTGHLFDLSSLSGK	28	Fucosylated	NSTHDDCQVTNPSTGHLFDLSSLSGK-N8H9F1S0G0	N8H9F1S0G0
FUT8 KO	cation-independent mannose-6-phosphate receptor	Membrane	WT+FUT8 KO	17	NSTHDDCQVTNPSTGHLFDLSSLSGK	28	Fucosylated	NSTHDDCQVTNPSTGHLFDLSSLSGK-N8H9F2S0G0	N8H9F2S0G0
FUT8 KO	cation-independent mannose-6-phosphate receptor	Membrane	WT+FUT8 KO	17	SLLEFNTTTDCQPSDSQHR	22	High-mannosylated	SLLEFNTTTDCQPSDSQHR-N2H3F0S0G0	N2H3F0S0G0
FUT8 KO	cation-independent mannose-6-phosphate receptor	Membrane	WT+FUT8 KO	17	SLLEFNTTTDCQPSDSQHR	22	Fucosylated	SLLEFNTTTDCQPSDSQHR-N2H3F1S0G0	N2H3F1S0G0
FUT8 KO	cation-independent mannose-6-phosphate receptor	Membrane	WT+FUT8 KO	17	SLLEFNTTTDCQPSDSQHR	22	High-mannosylated	SLLEFNTTTDCQPSDSQHR-N2H5F0S0G0	N2H5F0S0G0
FUT8 KO	cation-independent mannose-6-phosphate receptor	Membrane	WT+FUT8 KO	17	SLLEFNTTTDCQPSDSQHR	22	High-mannosylated	SLLEFNTTTDCQPSDSQHR-N2H6F0S0G0	N2H6F0S0G0
FUT8 KO	cation-independent mannose-6-phosphate receptor	Membrane	WT+FUT8 KO	17	SLLEFNTTTDCQPSDSQHR	22	High-mannosylated	SLLEFNTTTDCQPSDSQHR-N2H7F0S0G0	N2H7F0S0G0
FUT8 KO	cation-independent mannose-6-phosphate receptor	Membrane	WT+FUT8 KO	17	SLLEFNTTTDCQPSDSQHR	22	High-mannosylated	SLLEFNTTTDCQPSDSQHR-N2H8F0S0G0	N2H8F0S0G0
FUT8 KO	cation-independent mannose-6-phosphate receptor	Membrane	WT+FUT8 KO	17	SLLEFNTTTDCQPSDSQHR	22	High-mannosylated	SLLEFNTTTDCQPSDSQHR-N2H9F0S0G0	N2H9F0S0G0
FUT8 KO	cation-independent mannose-6-phosphate receptor	Membrane	WT+FUT8 KO	17	SLLEFNTTTDCQPSDSQHR	22	Complex/Hybrid	SLLEFNTTTDCQPSDSQHR-N3H3F0S0G0	N3H3F0S0G0
FUT8 KO	cation-independent mannose-6-phosphate receptor	Membrane	WT+FUT8 KO	17	SLLEFNTTTDCQPSDSQHR	22	Fucosylated	SLLEFNTTTDCQPSDSQHR-N4H4F1S0G0	N4H4F1S0G0
FUT8 KO	cation-independent mannose-6-phosphate receptor	Membrane	WT+FUT8 KO	17	SLLEFNTTTDCQPSDSQHR	22	Complex/Hybrid	SLLEFNTTTDCQPSDSQHR-N4H5F0S0G0	N4H5F0S0G0
FUT8 KO	cation-independent mannose-6-phosphate receptor	Membrane	WT+FUT8 KO	17	SLLEFNTTTDCQPSDSQHR	22	Sialylated	SLLEFNTTTDCQPSDSQHR-N4H5F0S2G0	N4H5F0S2G0
FUT8 KO	cation-independent mannose-6-phosphate receptor	Membrane	WT+FUT8 KO	17	SLLEFNTTTDCQPSDSQHR	22	Fucosylated	SLLEFNTTTDCQPSDSQHR-N4H5F1S0G0	N4H5F1S0G0
FUT8 KO	cation-independent mannose-6-phosphate receptor	Membrane	WT+FUT8 KO	17	SLLEFNTTTDCQPSDSQHR	22	Fucosylated	SLLEFNTTTDCQPSDSQHR-N4H5F2S0G0	N4H5F2S0G0
FUT8 KO	cation-independent mannose-6-phosphate receptor	Membrane	WT+FUT8 KO	17	SLLEFNTTTDCQPSDSQHR	22	Fucosylated	SLLEFNTTTDCQPSDSQHR-N4H5F3S0G0	N4H5F3S0G0
FUT8 KO	cation-independent mannose-6-phosphate receptor	Membrane	WT+FUT8 KO	17	SLLEFNTTTDCQPSDSQHR	22	Fucosylated	SLLEFNTTTDCQPSDSQHR-N5H6F4S0G0	N5H6F4S0G0
FUT8 KO	cation-independent mannose-6-phosphate receptor	Membrane	WT+FUT8 KO	17	SLLEFNTTTDCQPSDSQHR	22	Complex/Hybrid	SLLEFNTTTDCQPSDSQHR-N6H5F0S0G0	N6H5F0S0G0
FUT8 KO	cation-independent mannose-6-phosphate receptor	Membrane	WT+FUT8 KO	17	SLLEFNTTTDCQPSDSQHR	22	Complex/Hybrid	SLLEFNTTTDCQPSDSQHR-N6H7F0S0G0	N6H7F0S0G0
FUT8 KO	cation-independent mannose-6-phosphate receptor	Membrane	WT+FUT8 KO	17	SLLEFNTTTDCQPSDSQHR	22	Sialylated	SLLEFNTTTDCQPSDSQHR-N7H8F0S1G0	N7H8F0S1G0
FUT8 KO	cation-independent mannose-6-phosphate receptor	Membrane	WT+FUT8 KO	17	SLLEFNTTTDCQPSDSQHR	22	Fucosylated	SLLEFNTTTDCQPSDSQHR-N7H8F1S0G0	N7H8F1S0G0
FUT8 KO	cation-independent mannose-6-phosphate receptor	Membrane	WT+FUT8 KO	17	SWNLGLNNTR	3	High-mannosylated	SWNLGLNNTR-N2H5F0S0G0	N2H5F0S0G0
FUT8 KO	cation-independent mannose-6-phosphate receptor	Membrane	WT+FUT8 KO	17	SWNLGLNNTR	3	High-mannosylated	SWNLGLNNTR-N2H9F0S0G0	N2H9F0S0G0
FUT8 KO	cation-independent mannose-6-phosphate receptor	Membrane	WT+FUT8 KO	17	SWNLGLNNTR	3	Fucosylated	SWNLGLNNTR-N4H5F2S0G0	N4H5F2S0G0
FUT8 KO	cation-independent mannose-6-phosphate receptor	Membrane	WT+FUT8 KO	17	TEGENCTVFDAQAGFSFDLSPLTK	8	High-mannosylated	TEGENCTVFDAQAGFSFDLSPLTK-N2H9F0S0G0	N2H9F0S0G0
FUT8 KO	cation-independent mannose-6-phosphate receptor	Membrane	WT+FUT8 KO	17	TEGENCTVFDAQAGFSFDLSPLTK	8	Complex/Hybrid	TEGENCTVFDAQAGFSFDLSPLTK-N4H5F0S0G0	N4H5F0S0G0
FUT8 KO	cation-independent mannose-6-phosphate receptor	Membrane	WT+FUT8 KO	17	TEGENCTVFDAQAGFSFDLSPLTK	8	Fucosylated	TEGENCTVFDAQAGFSFDLSPLTK-N4H5F1S0G0	N4H5F1S0G0
FUT8 KO	cation-independent mannose-6-phosphate receptor	Membrane	WT+FUT8 KO	17	TEGENCTVFDAQAGFSFDLSPLTK	8	Fucosylated	TEGENCTVFDAQAGFSFDLSPLTK-N4H5F2S0G0	N4H5F2S0G0
FUT8 KO	cation-independent mannose-6-phosphate receptor	Membrane	WT+FUT8 KO	17	TEGENCTVFDAQAGFSFDLSPLTK	8	Fucosylated	TEGENCTVFDAQAGFSFDLSPLTK-N4H5F3S0G0	N4H5F3S0G0
FUT8 KO	cation-independent mannose-6-phosphate receptor	Membrane	WT+FUT8 KO	17	TEGENCTVFDAQAGFSFDLSPLTK	8	Fucosylated	TEGENCTVFDAQAGFSFDLSPLTK-N5H6F4S0G0	N5H6F4S0G0
FUT8 KO	cation-independent mannose-6-phosphate receptor	Membrane	WT+FUT8 KO	17	TEGENCTVFDAQAGFSFDLSPLTK	8	Complex/Hybrid	TEGENCTVFDAQAGFSFDLSPLTK-N6H7F0S0G0	N6H7F0S0G0
FUT8 KO	cation-independent mannose-6-phosphate receptor	Membrane	WT+FUT8 KO	17	TGPVVEESGSLLLEYVNGSACTTSDGR	27	High-mannosylated	TGPVVEESGSLLLEYVNGSACTTSDGR-N2H10F0S0G0	N2H10F0S0G0
FUT8 KO	cation-independent mannose-6-phosphate receptor	Membrane	WT+FUT8 KO	17	TGPVVEESGSLLLEYVNGSACTTSDGR	27	High-mannosylated	TGPVVEESGSLLLEYVNGSACTTSDGR-N2H3F0S0G0	N2H3F0S0G0
FUT8 KO	cation-independent mannose-6-phosphate receptor	Membrane	WT+FUT8 KO	17	TGPVVEESGSLLLEYVNGSACTTSDGR	27	Fucosylated	TGPVVEESGSLLLEYVNGSACTTSDGR-N2H3F1S0G0	N2H3F1S0G0
FUT8 KO	cation-independent mannose-6-phosphate receptor	Membrane	WT+FUT8 KO	17	TGPVVEESGSLLLEYVNGSACTTSDGR	27	High-mannosylated	TGPVVEESGSLLLEYVNGSACTTSDGR-N2H4F0S0G0	N2H4F0S0G0
FUT8 KO	cation-independent mannose-6-phosphate receptor	Membrane	WT+FUT8 KO	17	TGPVVEESGSLLLEYVNGSACTTSDGR	27	High-mannosylated	TGPVVEESGSLLLEYVNGSACTTSDGR-N2H5F0S0G0	N2H5F0S0G0
FUT8 KO	cation-independent mannose-6-phosphate receptor	Membrane	WT+FUT8 KO	17	TGPVVEESGSLLLEYVNGSACTTSDGR	27	High-mannosylated	TGPVVEESGSLLLEYVNGSACTTSDGR-N2H6F0S0G0	N2H6F0S0G0
FUT8 KO	cation-independent mannose-6-phosphate receptor	Membrane	WT+FUT8 KO	17	TGPVVEESGSLLLEYVNGSACTTSDGR	27	High-mannosylated	TGPVVEESGSLLLEYVNGSACTTSDGR-N2H7F0S0G0	N2H7F0S0G0
FUT8 KO	cation-independent mannose-6-phosphate receptor	Membrane	WT+FUT8 KO	17	TGPVVEESGSLLLEYVNGSACTTSDGR	27	High-mannosylated	TGPVVEESGSLLLEYVNGSACTTSDGR-N2H8F0S0G0	N2H8F0S0G0
FUT8 KO	cation-independent mannose-6-phosphate receptor	Membrane	WT+FUT8 KO	17	TGPVVEESGSLLLEYVNGSACTTSDGR	27	High-mannosylated	TGPVVEESGSLLLEYVNGSACTTSDGR-N2H9F0S0G0	N2H9F0S0G0
FUT8 KO	cation-independent mannose-6-phosphate receptor	Membrane	WT+FUT8 KO	17	TGPVVEESGSLLLEYVNGSACTTSDGR	27	Fucosylated	TGPVVEESGSLLLEYVNGSACTTSDGR-N4H3F1S0G0	N4H3F1S0G0
FUT8 KO	cation-independent mannose-6-phosphate receptor	Membrane	WT+FUT8 KO	17	TGPVVEESGSLLLEYVNGSACTTSDGR	27	Complex/Hybrid	TGPVVEESGSLLLEYVNGSACTTSDGR-N4H5F0S0G0	N4H5F0S0G0
FUT8 KO	cation-independent mannose-6-phosphate receptor	Membrane	WT+FUT8 KO	17	TGPVVEESGSLLLEYVNGSACTTSDGR	27	Sialylated	TGPVVEESGSLLLEYVNGSACTTSDGR-N4H5F0S1G0	N4H5F0S1G0
FUT8 KO	cation-independent mannose-6-phosphate receptor	Membrane	WT+FUT8 KO	17	TGPVVEESGSLLLEYVNGSACTTSDGR	27	Fucosylated	TGPVVEESGSLLLEYVNGSACTTSDGR-N4H5F1S0G0	N4H5F1S0G0
FUT8 KO	cation-independent mannose-6-phosphate receptor	Membrane	WT+FUT8 KO	17	TGPVVEESGSLLLEYVNGSACTTSDGR	27	Fucosylated	TGPVVEESGSLLLEYVNGSACTTSDGR-N4H5F2S0G0	N4H5F2S0G0
FUT8 KO	cation-independent mannose-6-phosphate receptor	Membrane	WT+FUT8 KO	17	TGPVVEESGSLLLEYVNGSACTTSDGR	27	Fucosylated	TGPVVEESGSLLLEYVNGSACTTSDGR-N5H6F2S0G0	N5H6F2S0G0
FUT8 KO	cation-independent mannose-6-phosphate receptor	Membrane	WT+FUT8 KO	17	TGPVVEESGSLLLEYVNGSACTTSDGR	27	Fucosylated	TGPVVEESGSLLLEYVNGSACTTSDGR-N5H6F4S0G0	N5H6F4S0G0
FUT8 KO	cation-independent mannose-6-phosphate receptor	Membrane	WT+FUT8 KO	17	TGPVVEESGSLLLEYVNGSACTTSDGR	27	Complex/Hybrid	TGPVVEESGSLLLEYVNGSACTTSDGR-N6H5F0S0G0	N6H5F0S0G0
FUT8 KO	cation-independent mannose-6-phosphate receptor	Membrane	WT+FUT8 KO	17	TGPVVEESGSLLLEYVNGSACTTSDGR	27	Complex/Hybrid	TGPVVEESGSLLLEYVNGSACTTSDGR-N6H7F0S0G0	N6H7F0S0G0
FUT8 KO	cation-independent mannose-6-phosphate receptor	Membrane	WT+FUT8 KO	17	TGPVVEESGSLLLEYVNGSACTTSDGR	27	Complex/Hybrid	TGPVVEESGSLLLEYVNGSACTTSDGR-N7H6F0S0G0	N7H6F0S0G0
FUT8 KO	cation-independent mannose-6-phosphate receptor	Membrane	WT+FUT8 KO	17	TGPVVEESGSLLLEYVNGSACTTSDGR	27	Complex/Hybrid	TGPVVEESGSLLLEYVNGSACTTSDGR-N7H8F0S0G0	N7H8F0S0G0
FUT8 KO	cation-independent mannose-6-phosphate receptor	Membrane	WT+FUT8 KO	17	TGPVVEESGSLLLEYVNGSACTTSDGR	27	Fucosylated	TGPVVEESGSLLLEYVNGSACTTSDGR-N7H8F1S0G0	N7H8F1S0G0
FUT8 KO	cation-independent mannose-6-phosphate receptor	Membrane	WT+FUT8 KO	17	TGPVVEESGSLLLEYVNGSACTTSDGR	27	Fucosylated	TGPVVEESGSLLLEYVNGSACTTSDGR-N7H8F2S0G0	N7H8F2S0G0
FUT8 KO	cation-independent mannose-6-phosphate receptor	Membrane	WT+FUT8 KO	17	TQGCSVTDEQLLYSFNLTSLSTSTFK	10	High-mannosylated	TQGCSVTDEQLLYSFNLTSLSTSTFK-N2H3F0S0G0	N2H3F0S0G0
FUT8 KO	cation-independent mannose-6-phosphate receptor	Membrane	WT+FUT8 KO	17	TQGCSVTDEQLLYSFNLTSLSTSTFK	10	High-mannosylated	TQGCSVTDEQLLYSFNLTSLSTSTFK-N2H5F0S0G0	N2H5F0S0G0
FUT8 KO	cation-independent mannose-6-phosphate receptor	Membrane	WT+FUT8 KO	17	TQGCSVTDEQLLYSFNLTSLSTSTFK	10	High-mannosylated	TQGCSVTDEQLLYSFNLTSLSTSTFK-N2H8F0S0G0	N2H8F0S0G0
FUT8 KO	cation-independent mannose-6-phosphate receptor	Membrane	WT+FUT8 KO	17	TQGCSVTDEQLLYSFNLTSLSTSTFK	10	High-mannosylated	TQGCSVTDEQLLYSFNLTSLSTSTFK-N2H9F0S0G0	N2H9F0S0G0
FUT8 KO	cation-independent mannose-6-phosphate receptor	Membrane	WT+FUT8 KO	17	TQGCSVTDEQLLYSFNLTSLSTSTFK	10	Complex/Hybrid	TQGCSVTDEQLLYSFNLTSLSTSTFK-N3H3F0S0G0	N3H3F0S0G0
FUT8 KO	cation-independent mannose-6-phosphate receptor	Membrane	WT+FUT8 KO	17	TQGCSVTDEQLLYSFNLTSLSTSTFK	10	Complex/Hybrid	TQGCSVTDEQLLYSFNLTSLSTSTFK-N4H5F0S0G0	N4H5F0S0G0
FUT8 KO	cation-independent mannose-6-phosphate receptor	Membrane	WT+FUT8 KO	17	TQGCSVTDEQLLYSFNLTSLSTSTFK	10	Sialylated	TQGCSVTDEQLLYSFNLTSLSTSTFK-N4H5F0S1G0	N4H5F0S1G0
FUT8 KO	cation-independent mannose-6-phosphate receptor	Membrane	WT+FUT8 KO	17	TQGCSVTDEQLLYSFNLTSLSTSTFK	10	Fucosylated	TQGCSVTDEQLLYSFNLTSLSTSTFK-N4H5F1S0G0	N4H5F1S0G0
FUT8 KO	cation-independent mannose-6-phosphate receptor	Membrane	WT+FUT8 KO	17	TQGCSVTDEQLLYSFNLTSLSTSTFK	10	Fucosylated	TQGCSVTDEQLLYSFNLTSLSTSTFK-N4H5F2S0G0	N4H5F2S0G0
FUT8 KO	cation-independent mannose-6-phosphate receptor	Membrane	WT+FUT8 KO	17	TQYACPPFNVTECSTQDGAGNSIDLSSLSR	34	High-mannosylated	TQYACPPFNVTECSTQDGAGNSIDLSSLSR-N2H10F0S0G0	N2H10F0S0G0
FUT8 KO	cation-independent mannose-6-phosphate receptor	Membrane	WT+FUT8 KO	17	TQYACPPFNVTECSTQDGAGNSIDLSSLSR	34	High-mannosylated	TQYACPPFNVTECSTQDGAGNSIDLSSLSR-N2H3F0S0G0	N2H3F0S0G0
FUT8 KO	cation-independent mannose-6-phosphate receptor	Membrane	WT+FUT8 KO	17	TQYACPPFNVTECSTQDGAGNSIDLSSLSR	34	Fucosylated	TQYACPPFNVTECSTQDGAGNSIDLSSLSR-N2H3F1S0G0	N2H3F1S0G0
FUT8 KO	cation-independent mannose-6-phosphate receptor	Membrane	WT+FUT8 KO	17	TQYACPPFNVTECSTQDGAGNSIDLSSLSR	34	High-mannosylated	TQYACPPFNVTECSTQDGAGNSIDLSSLSR-N2H5F0S0G0	N2H5F0S0G0
FUT8 KO	cation-independent mannose-6-phosphate receptor	Membrane	WT+FUT8 KO	17	TQYACPPFNVTECSTQDGAGNSIDLSSLSR	34	High-mannosylated	TQYACPPFNVTECSTQDGAGNSIDLSSLSR-N2H6F0S0G0	N2H6F0S0G0
FUT8 KO	cation-independent mannose-6-phosphate receptor	Membrane	WT+FUT8 KO	17	TQYACPPFNVTECSTQDGAGNSIDLSSLSR	34	High-mannosylated	TQYACPPFNVTECSTQDGAGNSIDLSSLSR-N2H7F0S0G0	N2H7F0S0G0
FUT8 KO	cation-independent mannose-6-phosphate receptor	Membrane	WT+FUT8 KO	17	TQYACPPFNVTECSTQDGAGNSIDLSSLSR	34	High-mannosylated	TQYACPPFNVTECSTQDGAGNSIDLSSLSR-N2H8F0S0G0	N2H8F0S0G0
FUT8 KO	cation-independent mannose-6-phosphate receptor	Membrane	WT+FUT8 KO	17	TQYACPPFNVTECSTQDGAGNSIDLSSLSR	34	High-mannosylated	TQYACPPFNVTECSTQDGAGNSIDLSSLSR-N2H9F0S0G0	N2H9F0S0G0
FUT8 KO	cation-independent mannose-6-phosphate receptor	Membrane	WT+FUT8 KO	17	TQYACPPFNVTECSTQDGAGNSIDLSSLSR	34	Complex/Hybrid	TQYACPPFNVTECSTQDGAGNSIDLSSLSR-N4H5F0S0G0	N4H5F0S0G0
FUT8 KO	cation-independent mannose-6-phosphate receptor	Membrane	WT+FUT8 KO	17	TQYACPPFNVTECSTQDGAGNSIDLSSLSR	34	Sialylated	TQYACPPFNVTECSTQDGAGNSIDLSSLSR-N4H5F0S2G0	N4H5F0S2G0
FUT8 KO	cation-independent mannose-6-phosphate receptor	Membrane	WT+FUT8 KO	17	TQYACPPFNVTECSTQDGAGNSIDLSSLSR	34	Fucosylated	TQYACPPFNVTECSTQDGAGNSIDLSSLSR-N4H5F1S0G0	N4H5F1S0G0
FUT8 KO	cation-independent mannose-6-phosphate receptor	Membrane	WT+FUT8 KO	17	TQYACPPFNVTECSTQDGAGNSIDLSSLSR	34	Fucosylated	TQYACPPFNVTECSTQDGAGNSIDLSSLSR-N4H5F2S0G0	N4H5F2S0G0
FUT8 KO	cation-independent mannose-6-phosphate receptor	Membrane	WT+FUT8 KO	17	TQYACPPFNVTECSTQDGAGNSIDLSSLSR	34	Fucosylated	TQYACPPFNVTECSTQDGAGNSIDLSSLSR-N4H5F3S0G0	N4H5F3S0G0
FUT8 KO	cation-independent mannose-6-phosphate receptor	Membrane	WT+FUT8 KO	17	TQYACPPFNVTECSTQDGAGNSIDLSSLSR	34	Complex/Hybrid	TQYACPPFNVTECSTQDGAGNSIDLSSLSR-N5H5F0S0G0	N5H5F0S0G0
FUT8 KO	cation-independent mannose-6-phosphate receptor	Membrane	WT+FUT8 KO	17	TQYACPPFNVTECSTQDGAGNSIDLSSLSR	34	Complex/Hybrid	TQYACPPFNVTECSTQDGAGNSIDLSSLSR-N5H6F0S0G0	N5H6F0S0G0
FUT8 KO	cation-independent mannose-6-phosphate receptor	Membrane	WT+FUT8 KO	17	TQYACPPFNVTECSTQDGAGNSIDLSSLSR	34	Fucosylated	TQYACPPFNVTECSTQDGAGNSIDLSSLSR-N5H6F1S0G0	N5H6F1S0G0
FUT8 KO	cation-independent mannose-6-phosphate receptor	Membrane	WT+FUT8 KO	17	TQYACPPFNVTECSTQDGAGNSIDLSSLSR	34	Fucosylated	TQYACPPFNVTECSTQDGAGNSIDLSSLSR-N5H6F2S0G0	N5H6F2S0G0
FUT8 KO	cation-independent mannose-6-phosphate receptor	Membrane	WT+FUT8 KO	17	TQYACPPFNVTECSTQDGAGNSIDLSSLSR	34	Fucosylated	TQYACPPFNVTECSTQDGAGNSIDLSSLSR-N5H6F3S0G0	N5H6F3S0G0
FUT8 KO	cation-independent mannose-6-phosphate receptor	Membrane	WT+FUT8 KO	17	TQYACPPFNVTECSTQDGAGNSIDLSSLSR	34	Fucosylated	TQYACPPFNVTECSTQDGAGNSIDLSSLSR-N5H6F4S0G0	N5H6F4S0G0
FUT8 KO	cation-independent mannose-6-phosphate receptor	Membrane	WT+FUT8 KO	17	TQYACPPFNVTECSTQDGAGNSIDLSSLSR	34	Complex/Hybrid	TQYACPPFNVTECSTQDGAGNSIDLSSLSR-N6H5F0S0G0	N6H5F0S0G0
FUT8 KO	cation-independent mannose-6-phosphate receptor	Membrane	WT+FUT8 KO	17	TQYACPPFNVTECSTQDGAGNSIDLSSLSR	34	Complex/Hybrid	TQYACPPFNVTECSTQDGAGNSIDLSSLSR-N6H7F0S0G0	N6H7F0S0G0
FUT8 KO	cation-independent mannose-6-phosphate receptor	Membrane	WT+FUT8 KO	17	TQYACPPFNVTECSTQDGAGNSIDLSSLSR	34	Fucosylated	TQYACPPFNVTECSTQDGAGNSIDLSSLSR-N6H7F4S0G0	N6H7F4S0G0
FUT8 KO	cation-independent mannose-6-phosphate receptor	Membrane	WT+FUT8 KO	17	TQYACPPFNVTECSTQDGAGNSIDLSSLSR	34	Complex/Hybrid	TQYACPPFNVTECSTQDGAGNSIDLSSLSR-N7H8F0S0G0	N7H8F0S0G0
FUT8 KO	cation-independent mannose-6-phosphate receptor	Membrane	WT+FUT8 KO	17	TQYACPPFNVTECSTQDGAGNSIDLSSLSR	34	Sialylated	TQYACPPFNVTECSTQDGAGNSIDLSSLSR-N7H8F0S1G0	N7H8F0S1G0
FUT8 KO	cation-independent mannose-6-phosphate receptor	Membrane	WT+FUT8 KO	17	TQYACPPFNVTECSTQDGAGNSIDLSSLSR	34	Fucosylated	TQYACPPFNVTECSTQDGAGNSIDLSSLSR-N7H8F1S0G0	N7H8F1S0G0
FUT8 KO	cation-independent mannose-6-phosphate receptor	Membrane	WT+FUT8 KO	17	TQYACPPFNVTECSTQDGAGNSIDLSSLSR	34	Fucosylated	TQYACPPFNVTECSTQDGAGNSIDLSSLSR-N7H8F2S0G0	N7H8F2S0G0
FUT8 KO	cation-independent mannose-6-phosphate receptor	Membrane	WT+FUT8 KO	17	TQYACPPFNVTECSTQDGAGNSIDLSSLSR	34	Fucosylated	TQYACPPFNVTECSTQDGAGNSIDLSSLSR-N8H9F1S0G0	N8H9F1S0G0
FUT8 KO	cation-independent mannose-6-phosphate receptor	Membrane	WT+FUT8 KO	17	TQYACPPFNVTECSTQDGAGNSIDLSSLSR	34	Fucosylated	TQYACPPFNVTECSTQDGAGNSIDLSSLSR-N8H9F2S0G0	N8H9F2S0G0
FUT8 KO	cation-independent mannose-6-phosphate receptor	Membrane	WT+FUT8 KO	17	TQYACPPFNVTECSTQDGAGNSIDLSSLSR	34	Fucosylated	TQYACPPFNVTECSTQDGAGNSIDLSSLSR-N8H9F3S0G0	N8H9F3S0G0
FUT8 KO	CD109 antigen	Extracellular region	WT+FUT8 KO	2	NASANVFFK	1	High-mannosylated	NASANVFFK-N2H9F0S0G0	N2H9F0S0G0
FUT8 KO	CD109 antigen	Extracellular region	WT+FUT8 KO	2	VNLYLDSVNETQFCVDVPAVR	14	High-mannosylated	VNLYLDSVNETQFCVDVPAVR-N2H10F0S0G0	N2H10F0S0G0
FUT8 KO	CD109 antigen	Extracellular region	WT+FUT8 KO	2	VNLYLDSVNETQFCVDVPAVR	14	High-mannosylated	VNLYLDSVNETQFCVDVPAVR-N2H5F0S0G0	N2H5F0S0G0
FUT8 KO	CD109 antigen	Extracellular region	WT+FUT8 KO	2	VNLYLDSVNETQFCVDVPAVR	14	High-mannosylated	VNLYLDSVNETQFCVDVPAVR-N2H6F0S0G0	N2H6F0S0G0
FUT8 KO	CD109 antigen	Extracellular region	WT+FUT8 KO	2	VNLYLDSVNETQFCVDVPAVR	14	High-mannosylated	VNLYLDSVNETQFCVDVPAVR-N2H7F0S0G0	N2H7F0S0G0
FUT8 KO	CD109 antigen	Extracellular region	WT+FUT8 KO	2	VNLYLDSVNETQFCVDVPAVR	14	High-mannosylated	VNLYLDSVNETQFCVDVPAVR-N2H8F0S0G0	N2H8F0S0G0
FUT8 KO	CD109 antigen	Extracellular region	WT+FUT8 KO	2	VNLYLDSVNETQFCVDVPAVR	14	High-mannosylated	VNLYLDSVNETQFCVDVPAVR-N2H9F0S0G0	N2H9F0S0G0
FUT8 KO	CD109 antigen	Extracellular region	WT+FUT8 KO	2	VNLYLDSVNETQFCVDVPAVR	14	Complex/Hybrid	VNLYLDSVNETQFCVDVPAVR-N4H5F0S0G0	N4H5F0S0G0
FUT8 KO	CD109 antigen	Extracellular region	WT+FUT8 KO	2	VNLYLDSVNETQFCVDVPAVR	14	Sialylated	VNLYLDSVNETQFCVDVPAVR-N4H5F0S1G0	N4H5F0S1G0
FUT8 KO	CD109 antigen	Extracellular region	WT+FUT8 KO	2	VNLYLDSVNETQFCVDVPAVR	14	Fucosylated	VNLYLDSVNETQFCVDVPAVR-N4H5F1S0G0	N4H5F1S0G0
FUT8 KO	CD109 antigen	Extracellular region	WT+FUT8 KO	2	VNLYLDSVNETQFCVDVPAVR	14	Fucosylated	VNLYLDSVNETQFCVDVPAVR-N4H5F2S0G0	N4H5F2S0G0
FUT8 KO	CD109 antigen	Extracellular region	WT+FUT8 KO	2	VNLYLDSVNETQFCVDVPAVR	14	Fucosylated	VNLYLDSVNETQFCVDVPAVR-N4H5F3S0G0	N4H5F3S0G0
FUT8 KO	CD109 antigen	Extracellular region	WT+FUT8 KO	2	VNLYLDSVNETQFCVDVPAVR	14	Complex/Hybrid	VNLYLDSVNETQFCVDVPAVR-N6H5F0S0G0	N6H5F0S0G0
FUT8 KO	CD151 antigen	Membrane	WT+FUT8 KO	1	LQQEFHCCGSNNSQDWR	25	High-mannosylated	LQQEFHCCGSNNSQDWR-N2H6F0S0G0	N2H6F0S0G0
FUT8 KO	CD151 antigen	Membrane	WT+FUT8 KO	1	LQQEFHCCGSNNSQDWR	25	High-mannosylated	LQQEFHCCGSNNSQDWR-N2H7F0S0G0	N2H7F0S0G0
FUT8 KO	CD151 antigen	Membrane	WT+FUT8 KO	1	LQQEFHCCGSNNSQDWR	25	High-mannosylated	LQQEFHCCGSNNSQDWR-N2H8F0S0G0	N2H8F0S0G0
FUT8 KO	CD151 antigen	Membrane	WT+FUT8 KO	1	LQQEFHCCGSNNSQDWR	25	High-mannosylated	LQQEFHCCGSNNSQDWR-N2H9F0S0G0	N2H9F0S0G0
FUT8 KO	CD151 antigen	Membrane	WT+FUT8 KO	1	LQQEFHCCGSNNSQDWR	25	Complex/Hybrid	LQQEFHCCGSNNSQDWR-N4H5F0S0G0	N4H5F0S0G0
FUT8 KO	CD151 antigen	Membrane	WT+FUT8 KO	1	LQQEFHCCGSNNSQDWR	25	Sialylated	LQQEFHCCGSNNSQDWR-N4H5F0S1G0	N4H5F0S1G0
FUT8 KO	CD151 antigen	Membrane	WT+FUT8 KO	1	LQQEFHCCGSNNSQDWR	25	Sialylated	LQQEFHCCGSNNSQDWR-N4H5F0S2G0	N4H5F0S2G0
FUT8 KO	CD151 antigen	Membrane	WT+FUT8 KO	1	LQQEFHCCGSNNSQDWR	25	Fucosylated	LQQEFHCCGSNNSQDWR-N4H5F2S0G0	N4H5F2S0G0
FUT8 KO	CD151 antigen	Membrane	WT+FUT8 KO	1	LQQEFHCCGSNNSQDWR	25	Fucosylated	LQQEFHCCGSNNSQDWR-N4H5F3S0G0	N4H5F3S0G0
FUT8 KO	CD151 antigen	Membrane	WT+FUT8 KO	1	LQQEFHCCGSNNSQDWR	25	Fucosylated	LQQEFHCCGSNNSQDWR-N5H5F1S0G0	N5H5F1S0G0
FUT8 KO	CD151 antigen	Membrane	WT+FUT8 KO	1	LQQEFHCCGSNNSQDWR	25	Sialylated	LQQEFHCCGSNNSQDWR-N5H6F0S1G0	N5H6F0S1G0
FUT8 KO	CD151 antigen	Membrane	WT+FUT8 KO	1	LQQEFHCCGSNNSQDWR	25	Sialylated	LQQEFHCCGSNNSQDWR-N5H6F0S2G0	N5H6F0S2G0
FUT8 KO	CD151 antigen	Membrane	WT+FUT8 KO	1	LQQEFHCCGSNNSQDWR	25	Sialylated	LQQEFHCCGSNNSQDWR-N5H6F0S3G0	N5H6F0S3G0
FUT8 KO	CD151 antigen	Membrane	WT+FUT8 KO	1	LQQEFHCCGSNNSQDWR	25	Fucosylated	LQQEFHCCGSNNSQDWR-N5H6F2S0G0	N5H6F2S0G0
FUT8 KO	CD151 antigen	Membrane	WT+FUT8 KO	1	LQQEFHCCGSNNSQDWR	25	Fucosylated	LQQEFHCCGSNNSQDWR-N5H6F3S0G0	N5H6F3S0G0
FUT8 KO	CD151 antigen	Membrane	WT+FUT8 KO	1	LQQEFHCCGSNNSQDWR	25	Fucosylated	LQQEFHCCGSNNSQDWR-N5H6F4S0G0	N5H6F4S0G0
FUT8 KO	CD151 antigen	Membrane	WT+FUT8 KO	1	LQQEFHCCGSNNSQDWR	25	Fucosylated	LQQEFHCCGSNNSQDWR-N6H5F1S0G0	N6H5F1S0G0
FUT8 KO	CD151 antigen	Membrane	WT+FUT8 KO	1	LQQEFHCCGSNNSQDWR	25	Complex/Hybrid	LQQEFHCCGSNNSQDWR-N6H7F0S0G0	N6H7F0S0G0
FUT8 KO	CD151 antigen	Membrane	WT+FUT8 KO	1	LQQEFHCCGSNNSQDWR	25	Fucosylated	LQQEFHCCGSNNSQDWR-N6H7F2S0G0	N6H7F2S0G0
FUT8 KO	CD151 antigen	Membrane	WT+FUT8 KO	1	LQQEFHCCGSNNSQDWR	25	Fucosylated	LQQEFHCCGSNNSQDWR-N6H7F4S0G0	N6H7F4S0G0
FUT8 KO	CD166 antigen	Membrane	WT+FUT8 KO	8	DSYPDGNITWYR	13	High-mannosylated	DSYPDGNITWYR-N2H8F0S0G0	N2H8F0S0G0
FUT8 KO	CD166 antigen	Membrane	WT+FUT8 KO	8	DSYPDGNITWYR	13	High-mannosylated	DSYPDGNITWYR-N2H9F0S0G0	N2H9F0S0G0
FUT8 KO	CD166 antigen	Membrane	WT+FUT8 KO	8	DSYPDGNITWYR	13	Complex/Hybrid	DSYPDGNITWYR-N4H5F0S0G0	N4H5F0S0G0
FUT8 KO	CD166 antigen	Membrane	WT+FUT8 KO	8	DSYPDGNITWYR	13	Sialylated	DSYPDGNITWYR-N4H5F0S1G0	N4H5F0S1G0
FUT8 KO	CD166 antigen	Membrane	WT+FUT8 KO	8	DSYPDGNITWYR	13	Sialylated	DSYPDGNITWYR-N4H5F0S2G0	N4H5F0S2G0
FUT8 KO	CD166 antigen	Membrane	WT+FUT8 KO	8	DSYPDGNITWYR	13	Fucosylated	DSYPDGNITWYR-N4H5F2S0G0	N4H5F2S0G0
FUT8 KO	CD166 antigen	Membrane	WT+FUT8 KO	8	DSYPDGNITWYR	13	Complex/Hybrid	DSYPDGNITWYR-N6H7F0S0G0	N6H7F0S0G0
FUT8 KO	CD166 antigen	Membrane	WT+FUT8 KO	8	EGDNITLQCLGNGNPPPEEFMFYLPGQPEGIR	24	Sialylated	EGDNITLQCLGNGNPPPEEFMFYLPGQPEGIR-N5H6F0S2G0	N5H6F0S2G0
FUT8 KO	CD166 antigen	Membrane	WT+FUT8 KO	8	EGDNITLQCLGNGNPPPEEFMFYLPGQPEGIR	24	Sialylated	EGDNITLQCLGNGNPPPEEFMFYLPGQPEGIR-N5H6F0S3G0	N5H6F0S3G0
FUT8 KO	CD166 antigen	Membrane	WT+FUT8 KO	8	EGDNITLQCLGNGNPPPEEFMFYLPGQPEGIR	24	Fucosylated	EGDNITLQCLGNGNPPPEEFMFYLPGQPEGIR-N5H6F2S0G0	N5H6F2S0G0
FUT8 KO	CD166 antigen	Membrane	WT+FUT8 KO	8	EGDNITLQCLGNGNPPPEEFMFYLPGQPEGIR	24	Fucosylated	EGDNITLQCLGNGNPPPEEFMFYLPGQPEGIR-N5H6F3S0G0	N5H6F3S0G0
FUT8 KO	CD166 antigen	Membrane	WT+FUT8 KO	8	EGDNITLQCLGNGNPPPEEFMFYLPGQPEGIR	24	Fucosylated	EGDNITLQCLGNGNPPPEEFMFYLPGQPEGIR-N5H6F4S0G0	N5H6F4S0G0
FUT8 KO	CD166 antigen	Membrane	WT+FUT8 KO	8	EGDNITLQCLGNGNPPPEEFMFYLPGQPEGIR	24	Complex/Hybrid	EGDNITLQCLGNGNPPPEEFMFYLPGQPEGIR-N6H7F0S0G0	N6H7F0S0G0
FUT8 KO	CD166 antigen	Membrane	WT+FUT8 KO	8	EGDNITLQCLGNGNPPPEEFMFYLPGQPEGIR	24	Fucosylated	EGDNITLQCLGNGNPPPEEFMFYLPGQPEGIR-N6H7F4S0G0	N6H7F4S0G0
FUT8 KO	CD166 antigen	Membrane	WT+FUT8 KO	8	EGDNITLQCLGNGNPPPEEFMFYLPGQPEGIR	24	Complex/Hybrid	EGDNITLQCLGNGNPPPEEFMFYLPGQPEGIR-N7H7F0S0G0	N7H7F0S0G0
FUT8 KO	CD166 antigen	Membrane	WT+FUT8 KO	8	EGDNITLQCLGNGNPPPEEFMFYLPGQPEGIR	24	Fucosylated	EGDNITLQCLGNGNPPPEEFMFYLPGQPEGIR-N7H7F1S0G0	N7H7F1S0G0
FUT8 KO	CD166 antigen	Membrane	WT+FUT8 KO	8	EGDNITLQCLGNGNPPPEEFMFYLPGQPEGIR	24	Complex/Hybrid	EGDNITLQCLGNGNPPPEEFMFYLPGQPEGIR-N7H8F0S0G0	N7H8F0S0G0
FUT8 KO	CD166 antigen	Membrane	WT+FUT8 KO	8	EGDNITLQCLGNGNPPPEEFMFYLPGQPEGIR	24	Fucosylated	EGDNITLQCLGNGNPPPEEFMFYLPGQPEGIR-N7H8F1S0G0	N7H8F1S0G0
FUT8 KO	CD166 antigen	Membrane	WT+FUT8 KO	8	EGDNITLQCLGNGNPPPEEFMFYLPGQPEGIR	24	Fucosylated	EGDNITLQCLGNGNPPPEEFMFYLPGQPEGIR-N7H8F2S0G0	N7H8F2S0G0
FUT8 KO	CD166 antigen	Membrane	WT+FUT8 KO	8	EGDNITLQCLGNGNPPPEEFMFYLPGQPEGIR	24	Complex/Hybrid	EGDNITLQCLGNGNPPPEEFMFYLPGQPEGIR-N8H8F0S0G0	N8H8F0S0G0
FUT8 KO	CD166 antigen	Membrane	WT+FUT8 KO	8	EGDNITLQCLGNGNPPPEEFMFYLPGQPEGIR	24	Fucosylated	EGDNITLQCLGNGNPPPEEFMFYLPGQPEGIR-N8H8F1S0G0	N8H8F1S0G0
FUT8 KO	CD166 antigen	Membrane	WT+FUT8 KO	8	EGDNITLQCLGNGNPPPEEFMFYLPGQPEGIR	24	Complex/Hybrid	EGDNITLQCLGNGNPPPEEFMFYLPGQPEGIR-N8H9F0S0G0	N8H9F0S0G0
FUT8 KO	CD166 antigen	Membrane	WT+FUT8 KO	8	EGDNITLQCLGNGNPPPEEFMFYLPGQPEGIR	24	Sialylated	EGDNITLQCLGNGNPPPEEFMFYLPGQPEGIR-N8H9F0S1G0	N8H9F0S1G0
FUT8 KO	CD166 antigen	Membrane	WT+FUT8 KO	8	EGDNITLQCLGNGNPPPEEFMFYLPGQPEGIR	24	Fucosylated	EGDNITLQCLGNGNPPPEEFMFYLPGQPEGIR-N8H9F1S0G0	N8H9F1S0G0
FUT8 KO	CD166 antigen	Membrane	WT+FUT8 KO	8	EGDNITLQCLGNGNPPPEEFMFYLPGQPEGIR	24	Fucosylated	EGDNITLQCLGNGNPPPEEFMFYLPGQPEGIR-N8H9F2S0G0	N8H9F2S0G0
FUT8 KO	CD166 antigen	Membrane	WT+FUT8 KO	8	EGDNITLQCLGNGNPPPEEFMFYLPGQPEGIR	24	Fucosylated	EGDNITLQCLGNGNPPPEEFMFYLPGQPEGIR-N9H10F2S0G0	N9H10F2S0G0
FUT8 KO	CD166 antigen	Membrane	WT+FUT8 KO	8	IIISPEENVTLTCAAENQLER	54	High-mannosylated	IIISPEENVTLTCAAENQLER-N2H10F0S0G0	N2H10F0S0G0
FUT8 KO	CD166 antigen	Membrane	WT+FUT8 KO	8	IIISPEENVTLTCAAENQLER	54	High-mannosylated	IIISPEENVTLTCAAENQLER-N2H5F0S0G0	N2H5F0S0G0
FUT8 KO	CD166 antigen	Membrane	WT+FUT8 KO	8	IIISPEENVTLTCAAENQLER	54	High-mannosylated	IIISPEENVTLTCAAENQLER-N2H6F0S0G0	N2H6F0S0G0
FUT8 KO	CD166 antigen	Membrane	WT+FUT8 KO	8	IIISPEENVTLTCAAENQLER	54	High-mannosylated	IIISPEENVTLTCAAENQLER-N2H7F0S0G0	N2H7F0S0G0
FUT8 KO	CD166 antigen	Membrane	WT+FUT8 KO	8	IIISPEENVTLTCAAENQLER	54	High-mannosylated	IIISPEENVTLTCAAENQLER-N2H8F0S0G0	N2H8F0S0G0
FUT8 KO	CD166 antigen	Membrane	WT+FUT8 KO	8	IIISPEENVTLTCAAENQLER	54	High-mannosylated	IIISPEENVTLTCAAENQLER-N2H9F0S0G0	N2H9F0S0G0
FUT8 KO	CD166 antigen	Membrane	WT+FUT8 KO	8	IIISPEENVTLTCAAENQLER	54	Complex/Hybrid	IIISPEENVTLTCAAENQLER-N3H3F0S0G0	N3H3F0S0G0
FUT8 KO	CD166 antigen	Membrane	WT+FUT8 KO	8	IIISPEENVTLTCAAENQLER	54	Fucosylated	IIISPEENVTLTCAAENQLER-N4H4F1S0G0	N4H4F1S0G0
FUT8 KO	CD166 antigen	Membrane	WT+FUT8 KO	8	IIISPEENVTLTCAAENQLER	54	Complex/Hybrid	IIISPEENVTLTCAAENQLER-N4H5F0S0G0	N4H5F0S0G0
FUT8 KO	CD166 antigen	Membrane	WT+FUT8 KO	8	IIISPEENVTLTCAAENQLER	54	Sialylated	IIISPEENVTLTCAAENQLER-N4H5F0S1G0	N4H5F0S1G0
FUT8 KO	CD166 antigen	Membrane	WT+FUT8 KO	8	IIISPEENVTLTCAAENQLER	54	Sialylated	IIISPEENVTLTCAAENQLER-N4H5F0S2G0	N4H5F0S2G0
FUT8 KO	CD166 antigen	Membrane	WT+FUT8 KO	8	IIISPEENVTLTCAAENQLER	54	Fucosylated	IIISPEENVTLTCAAENQLER-N4H5F1S0G0	N4H5F1S0G0
FUT8 KO	CD166 antigen	Membrane	WT+FUT8 KO	8	IIISPEENVTLTCAAENQLER	54	Fucosylated	IIISPEENVTLTCAAENQLER-N4H5F2S0G0	N4H5F2S0G0
FUT8 KO	CD166 antigen	Membrane	WT+FUT8 KO	8	IIISPEENVTLTCAAENQLER	54	Fucosylated	IIISPEENVTLTCAAENQLER-N4H5F3S0G0	N4H5F3S0G0
FUT8 KO	CD166 antigen	Membrane	WT+FUT8 KO	8	IIISPEENVTLTCAAENQLER	54	Complex/Hybrid	IIISPEENVTLTCAAENQLER-N4H6F0S0G0	N4H6F0S0G0
FUT8 KO	CD166 antigen	Membrane	WT+FUT8 KO	8	IIISPEENVTLTCAAENQLER	54	Fucosylated	IIISPEENVTLTCAAENQLER-N5H4F1S0G0	N5H4F1S0G0
FUT8 KO	CD166 antigen	Membrane	WT+FUT8 KO	8	IIISPEENVTLTCAAENQLER	54	Complex/Hybrid	IIISPEENVTLTCAAENQLER-N5H5F0S0G0	N5H5F0S0G0
FUT8 KO	CD166 antigen	Membrane	WT+FUT8 KO	8	IIISPEENVTLTCAAENQLER	54	Complex/Hybrid	IIISPEENVTLTCAAENQLER-N5H6F0S0G0	N5H6F0S0G0
FUT8 KO	CD166 antigen	Membrane	WT+FUT8 KO	8	IIISPEENVTLTCAAENQLER	54	Sialylated	IIISPEENVTLTCAAENQLER-N5H6F0S1G0	N5H6F0S1G0
FUT8 KO	CD166 antigen	Membrane	WT+FUT8 KO	8	IIISPEENVTLTCAAENQLER	54	Sialylated	IIISPEENVTLTCAAENQLER-N5H6F0S2G0	N5H6F0S2G0
FUT8 KO	CD166 antigen	Membrane	WT+FUT8 KO	8	IIISPEENVTLTCAAENQLER	54	Fucosylated	IIISPEENVTLTCAAENQLER-N5H6F1S0G0	N5H6F1S0G0
FUT8 KO	CD166 antigen	Membrane	WT+FUT8 KO	8	IIISPEENVTLTCAAENQLER	54	Fucosylated	IIISPEENVTLTCAAENQLER-N5H6F2S0G0	N5H6F2S0G0
FUT8 KO	CD166 antigen	Membrane	WT+FUT8 KO	8	IIISPEENVTLTCAAENQLER	54	Fucosylated	IIISPEENVTLTCAAENQLER-N5H6F3S0G0	N5H6F3S0G0
FUT8 KO	CD166 antigen	Membrane	WT+FUT8 KO	8	IIISPEENVTLTCAAENQLER	54	Fucosylated	IIISPEENVTLTCAAENQLER-N5H6F4S0G0	N5H6F4S0G0
FUT8 KO	CD166 antigen	Membrane	WT+FUT8 KO	8	IIISPEENVTLTCAAENQLER	54	Complex/Hybrid	IIISPEENVTLTCAAENQLER-N6H5F0S0G0	N6H5F0S0G0
FUT8 KO	CD166 antigen	Membrane	WT+FUT8 KO	8	IIISPEENVTLTCAAENQLER	54	Complex/Hybrid	IIISPEENVTLTCAAENQLER-N6H7F0S0G0	N6H7F0S0G0
FUT8 KO	CD166 antigen	Membrane	WT+FUT8 KO	8	IIISPEENVTLTCAAENQLER	54	Sialylated	IIISPEENVTLTCAAENQLER-N6H7F0S1G0	N6H7F0S1G0
FUT8 KO	CD166 antigen	Membrane	WT+FUT8 KO	8	IIISPEENVTLTCAAENQLER	54	Sialylated	IIISPEENVTLTCAAENQLER-N6H7F0S2G0	N6H7F0S2G0
FUT8 KO	CD166 antigen	Membrane	WT+FUT8 KO	8	IIISPEENVTLTCAAENQLER	54	Fucosylated	IIISPEENVTLTCAAENQLER-N6H7F1S0G0	N6H7F1S0G0
FUT8 KO	CD166 antigen	Membrane	WT+FUT8 KO	8	IIISPEENVTLTCAAENQLER	54	Fucosylated	IIISPEENVTLTCAAENQLER-N6H7F2S0G0	N6H7F2S0G0
FUT8 KO	CD166 antigen	Membrane	WT+FUT8 KO	8	IIISPEENVTLTCAAENQLER	54	Fucosylated	IIISPEENVTLTCAAENQLER-N6H7F3S0G0	N6H7F3S0G0
FUT8 KO	CD166 antigen	Membrane	WT+FUT8 KO	8	IIISPEENVTLTCAAENQLER	54	Fucosylated	IIISPEENVTLTCAAENQLER-N6H7F4S0G0	N6H7F4S0G0
FUT8 KO	CD166 antigen	Membrane	WT+FUT8 KO	8	IIISPEENVTLTCAAENQLER	54	Complex/Hybrid	IIISPEENVTLTCAAENQLER-N7H6F0S0G0	N7H6F0S0G0
FUT8 KO	CD166 antigen	Membrane	WT+FUT8 KO	8	IIISPEENVTLTCAAENQLER	54	Complex/Hybrid	IIISPEENVTLTCAAENQLER-N7H8F0S0G0	N7H8F0S0G0
FUT8 KO	CD166 antigen	Membrane	WT+FUT8 KO	8	IIISPEENVTLTCAAENQLER	54	Sialylated	IIISPEENVTLTCAAENQLER-N7H8F0S1G0	N7H8F0S1G0
FUT8 KO	CD166 antigen	Membrane	WT+FUT8 KO	8	IIISPEENVTLTCAAENQLER	54	Fucosylated	IIISPEENVTLTCAAENQLER-N7H8F1S0G0	N7H8F1S0G0
FUT8 KO	CD166 antigen	Membrane	WT+FUT8 KO	8	IIISPEENVTLTCAAENQLER	54	Fucosylated	IIISPEENVTLTCAAENQLER-N7H8F2S0G0	N7H8F2S0G0
FUT8 KO	CD166 antigen	Membrane	WT+FUT8 KO	8	IIISPEENVTLTCAAENQLER	54	Fucosylated	IIISPEENVTLTCAAENQLER-N7H8F4S0G0	N7H8F4S0G0
FUT8 KO	CD166 antigen	Membrane	WT+FUT8 KO	8	IIISPEENVTLTCAAENQLER	54	Fucosylated	IIISPEENVTLTCAAENQLER-N7H8F5S0G0	N7H8F5S0G0
FUT8 KO	CD166 antigen	Membrane	WT+FUT8 KO	8	IIISPEENVTLTCAAENQLER	54	Complex/Hybrid	IIISPEENVTLTCAAENQLER-N8H9F0S0G0	N8H9F0S0G0
FUT8 KO	CD166 antigen	Membrane	WT+FUT8 KO	8	IIISPEENVTLTCAAENQLER	54	Fucosylated	IIISPEENVTLTCAAENQLER-N8H9F1S0G0	N8H9F1S0G0
FUT8 KO	CD166 antigen	Membrane	WT+FUT8 KO	8	IIISPEENVTLTCAAENQLER	54	Fucosylated	IIISPEENVTLTCAAENQLER-N8H9F2S0G0	N8H9F2S0G0
FUT8 KO	CD166 antigen	Membrane	WT+FUT8 KO	8	IIISPEENVTLTCAAENQLER	54	Fucosylated	IIISPEENVTLTCAAENQLER-N9H10F1S0G0	N9H10F1S0G0
FUT8 KO	CD166 antigen	Membrane	WT+FUT8 KO	8	IIISPEENVTLTCAAENQLER	54	Fucosylated	IIISPEENVTLTCAAENQLER-N9H10F2S0G0	N9H10F2S0G0
FUT8 KO	CD166 antigen	Membrane	WT+FUT8 KO	8	LSLSENYTLSINNAK	24	Fucosylated	LSLSENYTLSINNAK-N2H3F1S0G0	N2H3F1S0G0
FUT8 KO	CD166 antigen	Membrane	WT+FUT8 KO	8	LSLSENYTLSINNAK	24	High-mannosylated	LSLSENYTLSINNAK-N2H5F0S0G0	N2H5F0S0G0
FUT8 KO	CD166 antigen	Membrane	WT+FUT8 KO	8	LSLSENYTLSINNAK	24	High-mannosylated	LSLSENYTLSINNAK-N2H7F0S0G0	N2H7F0S0G0
FUT8 KO	CD166 antigen	Membrane	WT+FUT8 KO	8	LSLSENYTLSINNAK	24	High-mannosylated	LSLSENYTLSINNAK-N2H8F0S0G0	N2H8F0S0G0
FUT8 KO	CD166 antigen	Membrane	WT+FUT8 KO	8	LSLSENYTLSINNAK	24	High-mannosylated	LSLSENYTLSINNAK-N2H9F0S0G0	N2H9F0S0G0
FUT8 KO	CD166 antigen	Membrane	WT+FUT8 KO	8	LSLSENYTLSINNAK	24	Sialylated	LSLSENYTLSINNAK-N4H5F0S1G0	N4H5F0S1G0
FUT8 KO	CD166 antigen	Membrane	WT+FUT8 KO	8	LSLSENYTLSINNAK	24	Sialylated	LSLSENYTLSINNAK-N4H5F0S2G0	N4H5F0S2G0
FUT8 KO	CD166 antigen	Membrane	WT+FUT8 KO	8	LSLSENYTLSINNAK	24	Fucosylated	LSLSENYTLSINNAK-N4H5F1S0G0	N4H5F1S0G0
FUT8 KO	CD166 antigen	Membrane	WT+FUT8 KO	8	LSLSENYTLSINNAK	24	Fucosylated	LSLSENYTLSINNAK-N4H5F2S0G0	N4H5F2S0G0
FUT8 KO	CD166 antigen	Membrane	WT+FUT8 KO	8	LSLSENYTLSINNAK	24	Fucosylated	LSLSENYTLSINNAK-N4H5F3S0G0	N4H5F3S0G0
FUT8 KO	CD166 antigen	Membrane	WT+FUT8 KO	8	LSLSENYTLSINNAK	24	Fucosylated	LSLSENYTLSINNAK-N5H6F2S0G0	N5H6F2S0G0
FUT8 KO	CD166 antigen	Membrane	WT+FUT8 KO	8	LSLSENYTLSINNAK	24	Fucosylated	LSLSENYTLSINNAK-N5H6F4S0G0	N5H6F4S0G0
FUT8 KO	CD166 antigen	Membrane	WT+FUT8 KO	8	LSLSENYTLSINNAK	24	Complex/Hybrid	LSLSENYTLSINNAK-N6H7F0S0G0	N6H7F0S0G0
FUT8 KO	CD166 antigen	Membrane	WT+FUT8 KO	8	LSLSENYTLSINNAK	24	Complex/Hybrid	LSLSENYTLSINNAK-N7H6F0S0G0	N7H6F0S0G0
FUT8 KO	CD166 antigen	Membrane	WT+FUT8 KO	8	LSLSENYTLSINNAK	24	Complex/Hybrid	LSLSENYTLSINNAK-N7H8F0S0G0	N7H8F0S0G0
FUT8 KO	CD166 antigen	Membrane	WT+FUT8 KO	8	LSLSENYTLSINNAK	24	Sialylated	LSLSENYTLSINNAK-N7H8F0S1G0	N7H8F0S1G0
FUT8 KO	CD166 antigen	Membrane	WT+FUT8 KO	8	NATVVWMK	36	Sialylated	NATVVWMK-N4H5F0S1G0	N4H5F0S1G0
FUT8 KO	CD166 antigen	Membrane	WT+FUT8 KO	8	NATVVWMK	36	Sialylated	NATVVWMK-N4H5F0S2G0	N4H5F0S2G0
FUT8 KO	CD166 antigen	Membrane	WT+FUT8 KO	8	NATVVWMK	36	Fucosylated	NATVVWMK-N4H5F1S0G0	N4H5F1S0G0
FUT8 KO	CD166 antigen	Membrane	WT+FUT8 KO	8	NATVVWMK	36	Fucosylated	NATVVWMK-N4H5F2S0G0	N4H5F2S0G0
FUT8 KO	CD166 antigen	Membrane	WT+FUT8 KO	8	NATVVWMK	36	Sialylated	NATVVWMK-N5H6F0S1G0	N5H6F0S1G0
FUT8 KO	CD166 antigen	Membrane	WT+FUT8 KO	8	NATVVWMK	36	Sialylated	NATVVWMK-N5H6F0S2G0	N5H6F0S2G0
FUT8 KO	CD166 antigen	Membrane	WT+FUT8 KO	8	NATVVWMK	36	Sialylated	NATVVWMK-N5H6F0S3G0	N5H6F0S3G0
FUT8 KO	CD166 antigen	Membrane	WT+FUT8 KO	8	NATVVWMK	36	Fucosylated	NATVVWMK-N5H6F2S0G0	N5H6F2S0G0
FUT8 KO	CD166 antigen	Membrane	WT+FUT8 KO	8	NATVVWMK	36	Fucosylated	NATVVWMK-N5H6F3S0G0	N5H6F3S0G0
FUT8 KO	CD166 antigen	Membrane	WT+FUT8 KO	8	NATVVWMK	36	Fucosylated	NATVVWMK-N5H6F4S0G0	N5H6F4S0G0
FUT8 KO	CD166 antigen	Membrane	WT+FUT8 KO	8	NATVVWMK	36	Fucosylated	NATVVWMK-N6H5F1S0G0	N6H5F1S0G0
FUT8 KO	CD166 antigen	Membrane	WT+FUT8 KO	8	NATVVWMK	36	Complex/Hybrid	NATVVWMK-N6H7F0S0G0	N6H7F0S0G0
FUT8 KO	CD166 antigen	Membrane	WT+FUT8 KO	8	NATVVWMK	36	Sialylated	NATVVWMK-N6H7F0S3G0	N6H7F0S3G0
FUT8 KO	CD166 antigen	Membrane	WT+FUT8 KO	8	NATVVWMK	36	Complex/Hybrid	NATVVWMK-N7H6F0S0G0	N7H6F0S0G0
FUT8 KO	CD166 antigen	Membrane	WT+FUT8 KO	8	NATVVWMK	36	Fucosylated	NATVVWMK-N7H6F1S0G0	N7H6F1S0G0
FUT8 KO	CD166 antigen	Membrane	WT+FUT8 KO	8	NATVVWMK	36	Fucosylated	NATVVWMK-N7H7F3S0G0	N7H7F3S0G0
FUT8 KO	CD166 antigen	Membrane	WT+FUT8 KO	8	NATVVWMK	36	Complex/Hybrid	NATVVWMK-N7H8F0S0G0	N7H8F0S0G0
FUT8 KO	CD166 antigen	Membrane	WT+FUT8 KO	8	NATVVWMK	36	Sialylated	NATVVWMK-N7H8F0S1G0	N7H8F0S1G0
FUT8 KO	CD166 antigen	Membrane	WT+FUT8 KO	8	NATVVWMK	36	Fucosylated	NATVVWMK-N7H8F1S0G0	N7H8F1S0G0
FUT8 KO	CD166 antigen	Membrane	WT+FUT8 KO	8	NATVVWMK	36	Sialylated	NATVVWMK-N8H9F0S1G0	N8H9F0S1G0
FUT8 KO	CD166 antigen	Membrane	WT+FUT8 KO	8	NATVVWMK	36	Fucosylated	NATVVWMK-N8H9F1S0G0	N8H9F1S0G0
FUT8 KO	CD166 antigen	Membrane	WT+FUT8 KO	8	NATVVWMK	36	Complex/Hybrid	NATVVWMK-N9H9F0S0G0	N9H9F0S0G0
FUT8 KO	CD166 antigen	Membrane	WT+FUT8 KO	8	TIICHVEGFPKPAIQWTITGSGSVINQTEESPYINGR	11	Fucosylated	TIICHVEGFPKPAIQWTITGSGSVINQTEESPYINGR-N10H11F4S0G0	N10H11F4S0G0
FUT8 KO	CD166 antigen	Membrane	WT+FUT8 KO	8	TIICHVEGFPKPAIQWTITGSGSVINQTEESPYINGR	11	Fucosylated	TIICHVEGFPKPAIQWTITGSGSVINQTEESPYINGR-N11H12F4S0G0	N11H12F4S0G0
FUT8 KO	CD166 antigen	Membrane	WT+FUT8 KO	8	TIICHVEGFPKPAIQWTITGSGSVINQTEESPYINGR	11	Complex/Hybrid	TIICHVEGFPKPAIQWTITGSGSVINQTEESPYINGR-N6H7F0S0G0	N6H7F0S0G0
FUT8 KO	CD166 antigen	Membrane	WT+FUT8 KO	8	TIICHVEGFPKPAIQWTITGSGSVINQTEESPYINGR	11	Fucosylated	TIICHVEGFPKPAIQWTITGSGSVINQTEESPYINGR-N7H8F2S0G0	N7H8F2S0G0
FUT8 KO	CD166 antigen	Membrane	WT+FUT8 KO	8	TIICHVEGFPKPAIQWTITGSGSVINQTEESPYINGR	11	Fucosylated	TIICHVEGFPKPAIQWTITGSGSVINQTEESPYINGR-N8H9F2S0G0	N8H9F2S0G0
FUT8 KO	CD166 antigen	Membrane	WT+FUT8 KO	8	TIICHVEGFPKPAIQWTITGSGSVINQTEESPYINGR	11	Fucosylated	TIICHVEGFPKPAIQWTITGSGSVINQTEESPYINGR-N8H9F7S0G0	N8H9F7S0G0
FUT8 KO	CD166 antigen	Membrane	WT+FUT8 KO	8	TIICHVEGFPKPAIQWTITGSGSVINQTEESPYINGR	11	Fucosylated	TIICHVEGFPKPAIQWTITGSGSVINQTEESPYINGR-N9H10F1S0G0	N9H10F1S0G0
FUT8 KO	CD166 antigen	Membrane	WT+FUT8 KO	8	TIICHVEGFPKPAIQWTITGSGSVINQTEESPYINGR	11	Fucosylated	TIICHVEGFPKPAIQWTITGSGSVINQTEESPYINGR-N9H10F2S0G0	N9H10F2S0G0
FUT8 KO	CD166 antigen	Membrane	WT+FUT8 KO	8	TIICHVEGFPKPAIQWTITGSGSVINQTEESPYINGR	11	Fucosylated	TIICHVEGFPKPAIQWTITGSGSVINQTEESPYINGR-N9H10F4S0G0	N9H10F4S0G0
FUT8 KO	CD166 antigen	Membrane	WT+FUT8 KO	8	TVNSLNVSAISIPEHDEADDISDENREK	1	Fucosylated	TVNSLNVSAISIPEHDEADDISDENREK-N8H9F1S0G0	N8H9F1S0G0
FUT8 KO	CD166 antigen	Membrane	WT+FUT8 KO	8	TVNSLNVSAISIPEHDEADDISDENR	26	High-mannosylated	TVNSLNVSAISIPEHDEADDISDENR-N2H7F0S0G0	N2H7F0S0G0
FUT8 KO	CD166 antigen	Membrane	WT+FUT8 KO	8	TVNSLNVSAISIPEHDEADDISDENR	26	High-mannosylated	TVNSLNVSAISIPEHDEADDISDENR-N2H8F0S0G0	N2H8F0S0G0
FUT8 KO	CD166 antigen	Membrane	WT+FUT8 KO	8	TVNSLNVSAISIPEHDEADDISDENR	26	High-mannosylated	TVNSLNVSAISIPEHDEADDISDENR-N2H9F0S0G0	N2H9F0S0G0
FUT8 KO	CD166 antigen	Membrane	WT+FUT8 KO	8	TVNSLNVSAISIPEHDEADDISDENR	26	Fucosylated	TVNSLNVSAISIPEHDEADDISDENR-N5H6F2S0G0	N5H6F2S0G0
FUT8 KO	CD166 antigen	Membrane	WT+FUT8 KO	8	TVNSLNVSAISIPEHDEADDISDENR	26	Fucosylated	TVNSLNVSAISIPEHDEADDISDENR-N5H6F4S0G0	N5H6F4S0G0
FUT8 KO	CD166 antigen	Membrane	WT+FUT8 KO	8	TVNSLNVSAISIPEHDEADDISDENR	26	Complex/Hybrid	TVNSLNVSAISIPEHDEADDISDENR-N6H7F0S0G0	N6H7F0S0G0
FUT8 KO	CD166 antigen	Membrane	WT+FUT8 KO	8	TVNSLNVSAISIPEHDEADDISDENR	26	Sialylated	TVNSLNVSAISIPEHDEADDISDENR-N6H7F0S2G0	N6H7F0S2G0
FUT8 KO	CD166 antigen	Membrane	WT+FUT8 KO	8	TVNSLNVSAISIPEHDEADDISDENR	26	Fucosylated	TVNSLNVSAISIPEHDEADDISDENR-N6H7F2S0G0	N6H7F2S0G0
FUT8 KO	CD166 antigen	Membrane	WT+FUT8 KO	8	TVNSLNVSAISIPEHDEADDISDENR	26	Fucosylated	TVNSLNVSAISIPEHDEADDISDENR-N6H7F4S0G0	N6H7F4S0G0
FUT8 KO	CD166 antigen	Membrane	WT+FUT8 KO	8	TVNSLNVSAISIPEHDEADDISDENR	26	Complex/Hybrid	TVNSLNVSAISIPEHDEADDISDENR-N7H8F0S0G0	N7H8F0S0G0
FUT8 KO	CD166 antigen	Membrane	WT+FUT8 KO	8	TVNSLNVSAISIPEHDEADDISDENR	26	Sialylated	TVNSLNVSAISIPEHDEADDISDENR-N7H8F0S1G0	N7H8F0S1G0
FUT8 KO	CD166 antigen	Membrane	WT+FUT8 KO	8	TVNSLNVSAISIPEHDEADDISDENR	26	Fucosylated	TVNSLNVSAISIPEHDEADDISDENR-N7H8F1S0G0	N7H8F1S0G0
FUT8 KO	CD166 antigen	Membrane	WT+FUT8 KO	8	TVNSLNVSAISIPEHDEADDISDENR	26	Fucosylated	TVNSLNVSAISIPEHDEADDISDENR-N7H8F2S0G0	N7H8F2S0G0
FUT8 KO	CD166 antigen	Membrane	WT+FUT8 KO	8	TVNSLNVSAISIPEHDEADDISDENR	26	Fucosylated	TVNSLNVSAISIPEHDEADDISDENR-N7H8F4S0G0	N7H8F4S0G0
FUT8 KO	CD166 antigen	Membrane	WT+FUT8 KO	8	TVNSLNVSAISIPEHDEADDISDENR	26	Complex/Hybrid	TVNSLNVSAISIPEHDEADDISDENR-N8H9F0S0G0	N8H9F0S0G0
FUT8 KO	CD166 antigen	Membrane	WT+FUT8 KO	8	TVNSLNVSAISIPEHDEADDISDENR	26	Sialylated	TVNSLNVSAISIPEHDEADDISDENR-N8H9F0S1G0	N8H9F0S1G0
FUT8 KO	CD166 antigen	Membrane	WT+FUT8 KO	8	TVNSLNVSAISIPEHDEADDISDENR	26	Fucosylated	TVNSLNVSAISIPEHDEADDISDENR-N8H9F1S0G0	N8H9F1S0G0
FUT8 KO	CD166 antigen	Membrane	WT+FUT8 KO	8	TVNSLNVSAISIPEHDEADDISDENR	26	Fucosylated	TVNSLNVSAISIPEHDEADDISDENR-N8H9F2S0G0	N8H9F2S0G0
FUT8 KO	CD166 antigen	Membrane	WT+FUT8 KO	8	TVNSLNVSAISIPEHDEADDISDENR	26	Fucosylated	TVNSLNVSAISIPEHDEADDISDENR-N8H9F6S0G0	N8H9F6S0G0
FUT8 KO	CD166 antigen	Membrane	WT+FUT8 KO	8	TVNSLNVSAISIPEHDEADDISDENR	26	Fucosylated	TVNSLNVSAISIPEHDEADDISDENR-N8H9F7S0G0	N8H9F7S0G0
FUT8 KO	CD166 antigen	Membrane	WT+FUT8 KO	8	TVNSLNVSAISIPEHDEADDISDENR	26	Fucosylated	TVNSLNVSAISIPEHDEADDISDENR-N9H10F1S0G0	N9H10F1S0G0
FUT8 KO	CD166 antigen	Membrane	WT+FUT8 KO	8	TVNSLNVSAISIPEHDEADDISDENR	26	Fucosylated	TVNSLNVSAISIPEHDEADDISDENR-N9H10F2S0G0	N9H10F2S0G0
FUT8 KO	CD276 antigen	Membrane	WT+FUT8 KO	2	DGQGLPLTGNVTTSQMANER	7	High-mannosylated	DGQGLPLTGNVTTSQMANER-N2H8F0S0G0	N2H8F0S0G0
FUT8 KO	CD276 antigen	Membrane	WT+FUT8 KO	2	DGQGLPLTGNVTTSQMANER	7	Sialylated	DGQGLPLTGNVTTSQMANER-N4H5F0S2G0	N4H5F0S2G0
FUT8 KO	CD276 antigen	Membrane	WT+FUT8 KO	2	DGQGLPLTGNVTTSQMANER	7	Fucosylated	DGQGLPLTGNVTTSQMANER-N4H5F3S0G0	N4H5F3S0G0
FUT8 KO	CD276 antigen	Membrane	WT+FUT8 KO	2	DGQGLPLTGNVTTSQMANER	7	Fucosylated	DGQGLPLTGNVTTSQMANER-N5H6F4S0G0	N5H6F4S0G0
FUT8 KO	CD276 antigen	Membrane	WT+FUT8 KO	2	DGQGLPLTGNVTTSQMANER	7	Complex/Hybrid	DGQGLPLTGNVTTSQMANER-N6H7F0S0G0	N6H7F0S0G0
FUT8 KO	CD276 antigen	Membrane	WT+FUT8 KO	2	DGQGLPLTGNVTTSQMANER	7	Complex/Hybrid	DGQGLPLTGNVTTSQMANER-N7H8F0S0G0	N7H8F0S0G0
FUT8 KO	CD276 antigen	Membrane	WT+FUT8 KO	2	TALFPELLEQGNASLR	6	High-mannosylated	TALFPELLEQGNASLR-N2H10F0S0G0	N2H10F0S0G0
FUT8 KO	CD276 antigen	Membrane	WT+FUT8 KO	2	TALFPELLEQGNASLR	6	High-mannosylated	TALFPELLEQGNASLR-N2H9F0S0G0	N2H9F0S0G0
FUT8 KO	CD276 antigen	Membrane	WT+FUT8 KO	2	TALFPELLEQGNASLR	6	Complex/Hybrid	TALFPELLEQGNASLR-N4H5F0S0G0	N4H5F0S0G0
FUT8 KO	CD276 antigen	Membrane	WT+FUT8 KO	2	TALFPELLEQGNASLR	6	Sialylated	TALFPELLEQGNASLR-N4H5F0S1G0	N4H5F0S1G0
FUT8 KO	CD276 antigen	Membrane	WT+FUT8 KO	2	TALFPELLEQGNASLR	6	Fucosylated	TALFPELLEQGNASLR-N4H5F2S0G0	N4H5F2S0G0
FUT8 KO	CD44 antigen	Membrane	WT+FUT8 KO	2	TEAADLCQAFNSTLPTMEQMQK	38	High-mannosylated	TEAADLCQAFNSTLPTMEQMQK-N2H8F0S0G0	N2H8F0S0G0
FUT8 KO	CD44 antigen	Membrane	WT+FUT8 KO	2	TEAADLCQAFNSTLPTMEQMQK	38	High-mannosylated	TEAADLCQAFNSTLPTMEQMQK-N2H9F0S0G0	N2H9F0S0G0
FUT8 KO	CD44 antigen	Membrane	WT+FUT8 KO	2	TEAADLCQAFNSTLPTMEQMQK	38	Complex/Hybrid	TEAADLCQAFNSTLPTMEQMQK-N5H6F0S0G0	N5H6F0S0G0
FUT8 KO	CD44 antigen	Membrane	WT+FUT8 KO	2	TEAADLCQAFNSTLPTMEQMQK	38	Sialylated	TEAADLCQAFNSTLPTMEQMQK-N5H6F0S1G0	N5H6F0S1G0
FUT8 KO	CD44 antigen	Membrane	WT+FUT8 KO	2	TEAADLCQAFNSTLPTMEQMQK	38	Sialylated	TEAADLCQAFNSTLPTMEQMQK-N5H6F0S2G0	N5H6F0S2G0
FUT8 KO	CD44 antigen	Membrane	WT+FUT8 KO	2	TEAADLCQAFNSTLPTMEQMQK	38	Sialylated	TEAADLCQAFNSTLPTMEQMQK-N5H6F0S3G0	N5H6F0S3G0
FUT8 KO	CD44 antigen	Membrane	WT+FUT8 KO	2	TEAADLCQAFNSTLPTMEQMQK	38	Fucosylated	TEAADLCQAFNSTLPTMEQMQK-N5H6F3S0G0	N5H6F3S0G0
FUT8 KO	CD44 antigen	Membrane	WT+FUT8 KO	2	TEAADLCQAFNSTLPTMEQMQK	38	Complex/Hybrid	TEAADLCQAFNSTLPTMEQMQK-N6H5F0S0G0	N6H5F0S0G0
FUT8 KO	CD44 antigen	Membrane	WT+FUT8 KO	2	TEAADLCQAFNSTLPTMEQMQK	38	Complex/Hybrid	TEAADLCQAFNSTLPTMEQMQK-N6H7F0S0G0	N6H7F0S0G0
FUT8 KO	CD44 antigen	Membrane	WT+FUT8 KO	2	TEAADLCQAFNSTLPTMEQMQK	38	Sialylated	TEAADLCQAFNSTLPTMEQMQK-N6H7F0S3G0	N6H7F0S3G0
FUT8 KO	CD44 antigen	Membrane	WT+FUT8 KO	2	TEAADLCQAFNSTLPTMEQMQK	38	Fucosylated	TEAADLCQAFNSTLPTMEQMQK-N6H7F4S0G0	N6H7F4S0G0
FUT8 KO	CD44 antigen	Membrane	WT+FUT8 KO	2	TEAADLCQAFNSTLPTMEQMQK	38	Complex/Hybrid	TEAADLCQAFNSTLPTMEQMQK-N7H8F0S0G0	N7H8F0S0G0
FUT8 KO	CD44 antigen	Membrane	WT+FUT8 KO	2	TEAADLCQAFNSTLPTMEQMQK	38	Sialylated	TEAADLCQAFNSTLPTMEQMQK-N7H8F0S1G0	N7H8F0S1G0
FUT8 KO	CD44 antigen	Membrane	WT+FUT8 KO	2	TEAADLCQAFNSTLPTMEQMQK	38	Sialylated	TEAADLCQAFNSTLPTMEQMQK-N8H9F0S1G0	N8H9F0S1G0
FUT8 KO	CD44 antigen	Membrane	WT+FUT8 KO	2	TEAADLCQAFNSTLPTMEQMQK	38	Sialylated	TEAADLCQAFNSTLPTMEQMQK-N8H9F0S2G0	N8H9F0S2G0
FUT8 KO	CD44 antigen	Membrane	WT+FUT8 KO	2	TEAADLCQAFNSTLPTMEQMQK	38	Fucosylated	TEAADLCQAFNSTLPTMEQMQK-N8H9F3S0G0	N8H9F3S0G0
FUT8 KO	CD44 antigen	Membrane	WT+FUT8 KO	2	TEAADLCQAFNSTLPTMEQMQK	38	Fucosylated	TEAADLCQAFNSTLPTMEQMQK-N8H9F4S0G0	N8H9F4S0G0
FUT8 KO	CD44 antigen	Membrane	WT+FUT8 KO	2	TEAADLCQAFNSTLPTMEQMQK	38	Fucosylated	TEAADLCQAFNSTLPTMEQMQK-N9H10F2S0G0	N9H10F2S0G0
FUT8 KO	CD44 antigen	Membrane	WT+FUT8 KO	2	THPEDINATSTIDDDVSSGSSSEK	40	Fucosylated	THPEDINATSTIDDDVSSGSSSEK-N10H11F4S0G0	N10H11F4S0G0
FUT8 KO	CD44 antigen	Membrane	WT+FUT8 KO	2	THPEDINATSTIDDDVSSGSSSEK	40	High-mannosylated	THPEDINATSTIDDDVSSGSSSEK-N2H10F0S0G0	N2H10F0S0G0
FUT8 KO	CD44 antigen	Membrane	WT+FUT8 KO	2	THPEDINATSTIDDDVSSGSSSEK	40	High-mannosylated	THPEDINATSTIDDDVSSGSSSEK-N2H4F0S0G0	N2H4F0S0G0
FUT8 KO	CD44 antigen	Membrane	WT+FUT8 KO	2	THPEDINATSTIDDDVSSGSSSEK	40	High-mannosylated	THPEDINATSTIDDDVSSGSSSEK-N2H5F0S0G0	N2H5F0S0G0
FUT8 KO	CD44 antigen	Membrane	WT+FUT8 KO	2	THPEDINATSTIDDDVSSGSSSEK	40	High-mannosylated	THPEDINATSTIDDDVSSGSSSEK-N2H6F0S0G0	N2H6F0S0G0
FUT8 KO	CD44 antigen	Membrane	WT+FUT8 KO	2	THPEDINATSTIDDDVSSGSSSEK	40	High-mannosylated	THPEDINATSTIDDDVSSGSSSEK-N2H7F0S0G0	N2H7F0S0G0
FUT8 KO	CD44 antigen	Membrane	WT+FUT8 KO	2	THPEDINATSTIDDDVSSGSSSEK	40	High-mannosylated	THPEDINATSTIDDDVSSGSSSEK-N2H8F0S0G0	N2H8F0S0G0
FUT8 KO	CD44 antigen	Membrane	WT+FUT8 KO	2	THPEDINATSTIDDDVSSGSSSEK	40	High-mannosylated	THPEDINATSTIDDDVSSGSSSEK-N2H9F0S0G0	N2H9F0S0G0
FUT8 KO	CD44 antigen	Membrane	WT+FUT8 KO	2	THPEDINATSTIDDDVSSGSSSEK	40	Fucosylated	THPEDINATSTIDDDVSSGSSSEK-N4H3F1S0G0	N4H3F1S0G0
FUT8 KO	CD44 antigen	Membrane	WT+FUT8 KO	2	THPEDINATSTIDDDVSSGSSSEK	40	Sialylated	THPEDINATSTIDDDVSSGSSSEK-N4H5F0S1G0	N4H5F0S1G0
FUT8 KO	CD44 antigen	Membrane	WT+FUT8 KO	2	THPEDINATSTIDDDVSSGSSSEK	40	Fucosylated	THPEDINATSTIDDDVSSGSSSEK-N4H5F1S0G0	N4H5F1S0G0
FUT8 KO	CD44 antigen	Membrane	WT+FUT8 KO	2	THPEDINATSTIDDDVSSGSSSEK	40	Fucosylated	THPEDINATSTIDDDVSSGSSSEK-N4H5F3S0G0	N4H5F3S0G0
FUT8 KO	CD44 antigen	Membrane	WT+FUT8 KO	2	THPEDINATSTIDDDVSSGSSSEK	40	Fucosylated	THPEDINATSTIDDDVSSGSSSEK-N5H3F1S0G0	N5H3F1S0G0
FUT8 KO	CD44 antigen	Membrane	WT+FUT8 KO	2	THPEDINATSTIDDDVSSGSSSEK	40	Fucosylated	THPEDINATSTIDDDVSSGSSSEK-N5H6F2S0G0	N5H6F2S0G0
FUT8 KO	CD44 antigen	Membrane	WT+FUT8 KO	2	THPEDINATSTIDDDVSSGSSSEK	40	Fucosylated	THPEDINATSTIDDDVSSGSSSEK-N5H6F3S0G0	N5H6F3S0G0
FUT8 KO	CD44 antigen	Membrane	WT+FUT8 KO	2	THPEDINATSTIDDDVSSGSSSEK	40	Fucosylated	THPEDINATSTIDDDVSSGSSSEK-N5H6F4S0G0	N5H6F4S0G0
FUT8 KO	CD44 antigen	Membrane	WT+FUT8 KO	2	THPEDINATSTIDDDVSSGSSSEK	40	Complex/Hybrid	THPEDINATSTIDDDVSSGSSSEK-N6H5F0S0G0	N6H5F0S0G0
FUT8 KO	CD44 antigen	Membrane	WT+FUT8 KO	2	THPEDINATSTIDDDVSSGSSSEK	40	Complex/Hybrid	THPEDINATSTIDDDVSSGSSSEK-N6H7F0S0G0	N6H7F0S0G0
FUT8 KO	CD44 antigen	Membrane	WT+FUT8 KO	2	THPEDINATSTIDDDVSSGSSSEK	40	Fucosylated	THPEDINATSTIDDDVSSGSSSEK-N6H7F2S0G0	N6H7F2S0G0
FUT8 KO	CD44 antigen	Membrane	WT+FUT8 KO	2	THPEDINATSTIDDDVSSGSSSEK	40	Fucosylated	THPEDINATSTIDDDVSSGSSSEK-N6H7F3S0G0	N6H7F3S0G0
FUT8 KO	CD44 antigen	Membrane	WT+FUT8 KO	2	THPEDINATSTIDDDVSSGSSSEK	40	Fucosylated	THPEDINATSTIDDDVSSGSSSEK-N6H7F4S0G0	N6H7F4S0G0
FUT8 KO	CD44 antigen	Membrane	WT+FUT8 KO	2	THPEDINATSTIDDDVSSGSSSEK	40	Complex/Hybrid	THPEDINATSTIDDDVSSGSSSEK-N7H8F0S0G0	N7H8F0S0G0
FUT8 KO	CD44 antigen	Membrane	WT+FUT8 KO	2	THPEDINATSTIDDDVSSGSSSEK	40	Sialylated	THPEDINATSTIDDDVSSGSSSEK-N7H8F0S1G0	N7H8F0S1G0
FUT8 KO	CD44 antigen	Membrane	WT+FUT8 KO	2	THPEDINATSTIDDDVSSGSSSEK	40	Fucosylated	THPEDINATSTIDDDVSSGSSSEK-N7H8F1S0G0	N7H8F1S0G0
FUT8 KO	CD44 antigen	Membrane	WT+FUT8 KO	2	THPEDINATSTIDDDVSSGSSSEK	40	Fucosylated	THPEDINATSTIDDDVSSGSSSEK-N7H8F2S0G0	N7H8F2S0G0
FUT8 KO	CD44 antigen	Membrane	WT+FUT8 KO	2	THPEDINATSTIDDDVSSGSSSEK	40	Fucosylated	THPEDINATSTIDDDVSSGSSSEK-N7H8F5S0G0	N7H8F5S0G0
FUT8 KO	CD44 antigen	Membrane	WT+FUT8 KO	2	THPEDINATSTIDDDVSSGSSSEK	40	Complex/Hybrid	THPEDINATSTIDDDVSSGSSSEK-N8H9F0S0G0	N8H9F0S0G0
FUT8 KO	CD44 antigen	Membrane	WT+FUT8 KO	2	THPEDINATSTIDDDVSSGSSSEK	40	Sialylated	THPEDINATSTIDDDVSSGSSSEK-N8H9F0S1G0	N8H9F0S1G0
FUT8 KO	CD44 antigen	Membrane	WT+FUT8 KO	2	THPEDINATSTIDDDVSSGSSSEK	40	Fucosylated	THPEDINATSTIDDDVSSGSSSEK-N8H9F1S0G0	N8H9F1S0G0
FUT8 KO	CD44 antigen	Membrane	WT+FUT8 KO	2	THPEDINATSTIDDDVSSGSSSEK	40	Fucosylated	THPEDINATSTIDDDVSSGSSSEK-N8H9F2S0G0	N8H9F2S0G0
FUT8 KO	CD44 antigen	Membrane	WT+FUT8 KO	2	THPEDINATSTIDDDVSSGSSSEK	40	Fucosylated	THPEDINATSTIDDDVSSGSSSEK-N8H9F4S0G0	N8H9F4S0G0
FUT8 KO	CD44 antigen	Membrane	WT+FUT8 KO	2	THPEDINATSTIDDDVSSGSSSEK	40	Fucosylated	THPEDINATSTIDDDVSSGSSSEK-N8H9F7S0G0	N8H9F7S0G0
FUT8 KO	CD44 antigen	Membrane	WT+FUT8 KO	2	THPEDINATSTIDDDVSSGSSSEK	40	Fucosylated	THPEDINATSTIDDDVSSGSSSEK-N9H10F2S0G0	N9H10F2S0G0
FUT8 KO	CD59 glycoprotein	Membrane	WT+FUT8 KO	1	TNATCSVNVDSCLVAVSGR	35	Sialylated	TNATCSVNVDSCLVAVSGR-N10H11F0S1G0	N10H11F0S1G0
FUT8 KO	CD59 glycoprotein	Membrane	WT+FUT8 KO	1	TNATCSVNVDSCLVAVSGR	35	High-mannosylated	TNATCSVNVDSCLVAVSGR-N2H3F0S0G0	N2H3F0S0G0
FUT8 KO	CD59 glycoprotein	Membrane	WT+FUT8 KO	1	TNATCSVNVDSCLVAVSGR	35	Fucosylated	TNATCSVNVDSCLVAVSGR-N2H3F1S0G0	N2H3F1S0G0
FUT8 KO	CD59 glycoprotein	Membrane	WT+FUT8 KO	1	TNATCSVNVDSCLVAVSGR	35	High-mannosylated	TNATCSVNVDSCLVAVSGR-N2H5F0S0G0	N2H5F0S0G0
FUT8 KO	CD59 glycoprotein	Membrane	WT+FUT8 KO	1	TNATCSVNVDSCLVAVSGR	35	High-mannosylated	TNATCSVNVDSCLVAVSGR-N2H6F0S0G0	N2H6F0S0G0
FUT8 KO	CD59 glycoprotein	Membrane	WT+FUT8 KO	1	TNATCSVNVDSCLVAVSGR	35	High-mannosylated	TNATCSVNVDSCLVAVSGR-N2H7F0S0G0	N2H7F0S0G0
FUT8 KO	CD59 glycoprotein	Membrane	WT+FUT8 KO	1	TNATCSVNVDSCLVAVSGR	35	High-mannosylated	TNATCSVNVDSCLVAVSGR-N2H8F0S0G0	N2H8F0S0G0
FUT8 KO	CD59 glycoprotein	Membrane	WT+FUT8 KO	1	TNATCSVNVDSCLVAVSGR	35	High-mannosylated	TNATCSVNVDSCLVAVSGR-N2H9F0S0G0	N2H9F0S0G0
FUT8 KO	CD59 glycoprotein	Membrane	WT+FUT8 KO	1	TNATCSVNVDSCLVAVSGR	35	Fucosylated	TNATCSVNVDSCLVAVSGR-N4H3F1S0G0	N4H3F1S0G0
FUT8 KO	CD59 glycoprotein	Membrane	WT+FUT8 KO	1	TNATCSVNVDSCLVAVSGR	35	Complex/Hybrid	TNATCSVNVDSCLVAVSGR-N4H5F0S0G0	N4H5F0S0G0
FUT8 KO	CD59 glycoprotein	Membrane	WT+FUT8 KO	1	TNATCSVNVDSCLVAVSGR	35	Sialylated	TNATCSVNVDSCLVAVSGR-N4H5F0S1G0	N4H5F0S1G0
FUT8 KO	CD59 glycoprotein	Membrane	WT+FUT8 KO	1	TNATCSVNVDSCLVAVSGR	35	Sialylated	TNATCSVNVDSCLVAVSGR-N4H5F0S2G0	N4H5F0S2G0
FUT8 KO	CD59 glycoprotein	Membrane	WT+FUT8 KO	1	TNATCSVNVDSCLVAVSGR	35	Fucosylated	TNATCSVNVDSCLVAVSGR-N4H5F1S0G0	N4H5F1S0G0
FUT8 KO	CD59 glycoprotein	Membrane	WT+FUT8 KO	1	TNATCSVNVDSCLVAVSGR	35	Fucosylated	TNATCSVNVDSCLVAVSGR-N4H5F2S0G0	N4H5F2S0G0
FUT8 KO	CD59 glycoprotein	Membrane	WT+FUT8 KO	1	TNATCSVNVDSCLVAVSGR	35	Fucosylated	TNATCSVNVDSCLVAVSGR-N5H6F2S0G0	N5H6F2S0G0
FUT8 KO	CD59 glycoprotein	Membrane	WT+FUT8 KO	1	TNATCSVNVDSCLVAVSGR	35	Fucosylated	TNATCSVNVDSCLVAVSGR-N5H6F4S0G0	N5H6F4S0G0
FUT8 KO	CD59 glycoprotein	Membrane	WT+FUT8 KO	1	TNATCSVNVDSCLVAVSGR	35	Complex/Hybrid	TNATCSVNVDSCLVAVSGR-N6H5F0S0G0	N6H5F0S0G0
FUT8 KO	CD59 glycoprotein	Membrane	WT+FUT8 KO	1	TNATCSVNVDSCLVAVSGR	35	Complex/Hybrid	TNATCSVNVDSCLVAVSGR-N6H7F0S0G0	N6H7F0S0G0
FUT8 KO	CD59 glycoprotein	Membrane	WT+FUT8 KO	1	TNATCSVNVDSCLVAVSGR	35	Fucosylated	TNATCSVNVDSCLVAVSGR-N6H7F3S0G0	N6H7F3S0G0
FUT8 KO	CD59 glycoprotein	Membrane	WT+FUT8 KO	1	TNATCSVNVDSCLVAVSGR	35	Fucosylated	TNATCSVNVDSCLVAVSGR-N6H7F4S0G0	N6H7F4S0G0
FUT8 KO	CD59 glycoprotein	Membrane	WT+FUT8 KO	1	TNATCSVNVDSCLVAVSGR	35	Complex/Hybrid	TNATCSVNVDSCLVAVSGR-N7H8F0S0G0	N7H8F0S0G0
FUT8 KO	CD59 glycoprotein	Membrane	WT+FUT8 KO	1	TNATCSVNVDSCLVAVSGR	35	Fucosylated	TNATCSVNVDSCLVAVSGR-N7H8F4S0G0	N7H8F4S0G0
FUT8 KO	CD59 glycoprotein	Membrane	WT+FUT8 KO	1	TNATCSVNVDSCLVAVSGR	35	Fucosylated	TNATCSVNVDSCLVAVSGR-N7H8F5S0G0	N7H8F5S0G0
FUT8 KO	CD59 glycoprotein	Membrane	WT+FUT8 KO	1	TNATCSVNVDSCLVAVSGR	35	Complex/Hybrid	TNATCSVNVDSCLVAVSGR-N8H9F0S0G0	N8H9F0S0G0
FUT8 KO	CD59 glycoprotein	Membrane	WT+FUT8 KO	1	TNATCSVNVDSCLVAVSGR	35	Fucosylated	TNATCSVNVDSCLVAVSGR-N8H9F6S0G0	N8H9F6S0G0
FUT8 KO	CD59 glycoprotein	Membrane	WT+FUT8 KO	1	TNATCSVNVDSCLVAVSGR	35	Fucosylated	TNATCSVNVDSCLVAVSGR-N9H10F1S0G0	N9H10F1S0G0
FUT8 KO	CD63 antigen	Membrane	WT+FUT8 KO	1	DRVPDSCCINITVGCGIDFK	21	Complex/Hybrid	DRVPDSCCINITVGCGIDFK-N10H11F0S0G0	N10H11F0S0G0
FUT8 KO	CD63 antigen	Membrane	WT+FUT8 KO	1	DRVPDSCCINITVGCGIDFK	21	Fucosylated	DRVPDSCCINITVGCGIDFK-N11H12F1S0G0	N11H12F1S0G0
FUT8 KO	CD63 antigen	Membrane	WT+FUT8 KO	1	DRVPDSCCINITVGCGIDFK	21	Fucosylated	DRVPDSCCINITVGCGIDFK-N11H12F4S0G0	N11H12F4S0G0
FUT8 KO	CD63 antigen	Membrane	WT+FUT8 KO	1	DRVPDSCCINITVGCGIDFK	21	Fucosylated	DRVPDSCCINITVGCGIDFK-N11H12F7S0G0	N11H12F7S0G0
FUT8 KO	CD63 antigen	Membrane	WT+FUT8 KO	1	DRVPDSCCINITVGCGIDFK	21	High-mannosylated	DRVPDSCCINITVGCGIDFK-N2H10F0S0G0	N2H10F0S0G0
FUT8 KO	CD63 antigen	Membrane	WT+FUT8 KO	1	DRVPDSCCINITVGCGIDFK	21	High-mannosylated	DRVPDSCCINITVGCGIDFK-N2H6F0S0G0	N2H6F0S0G0
FUT8 KO	CD63 antigen	Membrane	WT+FUT8 KO	1	DRVPDSCCINITVGCGIDFK	21	High-mannosylated	DRVPDSCCINITVGCGIDFK-N2H8F0S0G0	N2H8F0S0G0
FUT8 KO	CD63 antigen	Membrane	WT+FUT8 KO	1	DRVPDSCCINITVGCGIDFK	21	High-mannosylated	DRVPDSCCINITVGCGIDFK-N2H9F0S0G0	N2H9F0S0G0
FUT8 KO	CD63 antigen	Membrane	WT+FUT8 KO	1	DRVPDSCCINITVGCGIDFK	21	Fucosylated	DRVPDSCCINITVGCGIDFK-N4H5F3S0G0	N4H5F3S0G0
FUT8 KO	CD63 antigen	Membrane	WT+FUT8 KO	1	DRVPDSCCINITVGCGIDFK	21	Complex/Hybrid	DRVPDSCCINITVGCGIDFK-N6H5F0S0G0	N6H5F0S0G0
FUT8 KO	CD63 antigen	Membrane	WT+FUT8 KO	1	DRVPDSCCINITVGCGIDFK	21	Fucosylated	DRVPDSCCINITVGCGIDFK-N7H8F4S0G0	N7H8F4S0G0
FUT8 KO	CD63 antigen	Membrane	WT+FUT8 KO	1	DRVPDSCCINITVGCGIDFK	21	Fucosylated	DRVPDSCCINITVGCGIDFK-N8H9F4S0G0	N8H9F4S0G0
FUT8 KO	CD63 antigen	Membrane	WT+FUT8 KO	1	DRVPDSCCINITVGCGIDFK	21	Fucosylated	DRVPDSCCINITVGCGIDFK-N8H9F6S0G0	N8H9F6S0G0
FUT8 KO	CD63 antigen	Membrane	WT+FUT8 KO	1	DRVPDSCCINITVGCGIDFK	21	Fucosylated	DRVPDSCCINITVGCGIDFK-N9H10F1S0G0	N9H10F1S0G0
FUT8 KO	ceroid-lipofuscinosis neuronal protein 5	Lysosome	WT+FUT8 KO	1	ENGTLAPVATMSGNTFNK	4	High-mannosylated	ENGTLAPVATMSGNTFNK-N2H6F0S0G0	N2H6F0S0G0
FUT8 KO	ceroid-lipofuscinosis neuronal protein 5	Lysosome	WT+FUT8 KO	1	ENGTLAPVATMSGNTFNK	4	High-mannosylated	ENGTLAPVATMSGNTFNK-N2H7F0S0G0	N2H7F0S0G0
FUT8 KO	ceroid-lipofuscinosis neuronal protein 5	Lysosome	WT+FUT8 KO	1	ENGTLAPVATMSGNTFNK	4	High-mannosylated	ENGTLAPVATMSGNTFNK-N2H8F0S0G0	N2H8F0S0G0
FUT8 KO	ceroid-lipofuscinosis neuronal protein 5	Lysosome	WT+FUT8 KO	1	ENGTLAPVATMSGNTFNK	4	High-mannosylated	ENGTLAPVATMSGNTFNK-N2H9F0S0G0	N2H9F0S0G0
FUT8 KO	choline transporter-like protein 1	Membrane	WT+FUT8 KO	1	FAEINGSALCTYNIKPSEYTLSAK	4	High-mannosylated	FAEINGSALCTYNIKPSEYTLSAK-N2H5F0S0G0	N2H5F0S0G0
FUT8 KO	choline transporter-like protein 1	Membrane	WT+FUT8 KO	1	FAEINGSALCTYNIKPSEYTLSAK	4	High-mannosylated	FAEINGSALCTYNIKPSEYTLSAK-N2H6F0S0G0	N2H6F0S0G0
FUT8 KO	choline transporter-like protein 1	Membrane	WT+FUT8 KO	1	FAEINGSALCTYNIKPSEYTLSAK	4	Fucosylated	FAEINGSALCTYNIKPSEYTLSAK-N4H5F2S0G0	N4H5F2S0G0
FUT8 KO	choline transporter-like protein 2	Membrane	WT+FUT8 KO	4	GVLMVGNETTYEDGHGTR	4	High-mannosylated	GVLMVGNETTYEDGHGTR-N2H8F0S0G0	N2H8F0S0G0
FUT8 KO	choline transporter-like protein 2	Membrane	WT+FUT8 KO	4	GVLMVGNETTYEDGHGTR	4	High-mannosylated	GVLMVGNETTYEDGHGTR-N2H9F0S0G0	N2H9F0S0G0
FUT8 KO	choline transporter-like protein 2	Membrane	WT+FUT8 KO	4	GVLMVGNETTYEDGHGTR	4	Complex/Hybrid	GVLMVGNETTYEDGHGTR-N6H5F0S0G0	N6H5F0S0G0
FUT8 KO	choline transporter-like protein 2	Membrane	WT+FUT8 KO	4	GVLMVGNETTYEDGHGTR	4	Fucosylated	GVLMVGNETTYEDGHGTR-N9H10F1S0G0	N9H10F1S0G0
FUT8 KO	choline transporter-like protein 2	Membrane	WT+FUT8 KO	4	KNITELVEGAK	2	High-mannosylated	KNITELVEGAK-N2H9F0S0G0	N2H9F0S0G0
FUT8 KO	choline transporter-like protein 2	Membrane	WT+FUT8 KO	4	KNITELVEGAK	2	Fucosylated	KNITELVEGAK-N7H8F1S0G0	N7H8F1S0G0
FUT8 KO	choline transporter-like protein 2	Membrane	WT+FUT8 KO	4	TCNPETFPSVNESR	2	Complex/Hybrid	TCNPETFPSVNESR-N6H7F0S0G0	N6H7F0S0G0
FUT8 KO	chondroitin sulfate proteoglycan 4	Membrane	WT+FUT8 KO	4	LFHAQQGSAEEALVNFTQAEVNAGNILYEHGK	22	High-mannosylated	LFHAQQGSAEEALVNFTQAEVNAGNILYEHGK-N2H8F0S0G0	N2H8F0S0G0
FUT8 KO	chondroitin sulfate proteoglycan 4	Membrane	WT+FUT8 KO	4	LFHAQQGSAEEALVNFTQAEVNAGNILYEHGK	22	High-mannosylated	LFHAQQGSAEEALVNFTQAEVNAGNILYEHGK-N2H9F0S0G0	N2H9F0S0G0
FUT8 KO	chondroitin sulfate proteoglycan 4	Membrane	WT+FUT8 KO	4	LFHAQQGSAEEALVNFTQAEVNAGNILYEHGK	22	Complex/Hybrid	LFHAQQGSAEEALVNFTQAEVNAGNILYEHGK-N4H5F0S0G0	N4H5F0S0G0
FUT8 KO	chondroitin sulfate proteoglycan 4	Membrane	WT+FUT8 KO	4	LFHAQQGSAEEALVNFTQAEVNAGNILYEHGK	22	Sialylated	LFHAQQGSAEEALVNFTQAEVNAGNILYEHGK-N4H5F0S2G0	N4H5F0S2G0
FUT8 KO	chondroitin sulfate proteoglycan 4	Membrane	WT+FUT8 KO	4	LFHAQQGSAEEALVNFTQAEVNAGNILYEHGK	22	Fucosylated	LFHAQQGSAEEALVNFTQAEVNAGNILYEHGK-N4H5F1S0G0	N4H5F1S0G0
FUT8 KO	chondroitin sulfate proteoglycan 4	Membrane	WT+FUT8 KO	4	LFHAQQGSAEEALVNFTQAEVNAGNILYEHGK	22	Fucosylated	LFHAQQGSAEEALVNFTQAEVNAGNILYEHGK-N4H5F2S0G0	N4H5F2S0G0
FUT8 KO	chondroitin sulfate proteoglycan 4	Membrane	WT+FUT8 KO	4	LFHAQQGSAEEALVNFTQAEVNAGNILYEHGK	22	Fucosylated	LFHAQQGSAEEALVNFTQAEVNAGNILYEHGK-N4H5F3S0G0	N4H5F3S0G0
FUT8 KO	chondroitin sulfate proteoglycan 4	Membrane	WT+FUT8 KO	4	LFHAQQGSAEEALVNFTQAEVNAGNILYEHGK	22	Fucosylated	LFHAQQGSAEEALVNFTQAEVNAGNILYEHGK-N5H6F3S0G0	N5H6F3S0G0
FUT8 KO	chondroitin sulfate proteoglycan 4	Membrane	WT+FUT8 KO	4	LFHAQQGSAEEALVNFTQAEVNAGNILYEHGK	22	Fucosylated	LFHAQQGSAEEALVNFTQAEVNAGNILYEHGK-N5H6F4S0G0	N5H6F4S0G0
FUT8 KO	chondroitin sulfate proteoglycan 4	Membrane	WT+FUT8 KO	4	LFHAQQGSAEEALVNFTQAEVNAGNILYEHGK	22	Complex/Hybrid	LFHAQQGSAEEALVNFTQAEVNAGNILYEHGK-N6H7F0S0G0	N6H7F0S0G0
FUT8 KO	chondroitin sulfate proteoglycan 4	Membrane	WT+FUT8 KO	4	LFHAQQGSAEEALVNFTQAEVNAGNILYEHGK	22	Fucosylated	LFHAQQGSAEEALVNFTQAEVNAGNILYEHGK-N6H7F1S0G0	N6H7F1S0G0
FUT8 KO	chondroitin sulfate proteoglycan 4	Membrane	WT+FUT8 KO	4	LFHAQQGSAEEALVNFTQAEVNAGNILYEHGK	22	Complex/Hybrid	LFHAQQGSAEEALVNFTQAEVNAGNILYEHGK-N7H6F0S0G0	N7H6F0S0G0
FUT8 KO	chondroitin sulfate proteoglycan 4	Membrane	WT+FUT8 KO	4	LFHAQQGSAEEALVNFTQAEVNAGNILYEHGK	22	Complex/Hybrid	LFHAQQGSAEEALVNFTQAEVNAGNILYEHGK-N7H7F0S0G0	N7H7F0S0G0
FUT8 KO	chondroitin sulfate proteoglycan 4	Membrane	WT+FUT8 KO	4	LFHAQQGSAEEALVNFTQAEVNAGNILYEHGK	22	Complex/Hybrid	LFHAQQGSAEEALVNFTQAEVNAGNILYEHGK-N7H8F0S0G0	N7H8F0S0G0
FUT8 KO	chondroitin sulfate proteoglycan 4	Membrane	WT+FUT8 KO	4	LFHAQQGSAEEALVNFTQAEVNAGNILYEHGK	22	Fucosylated	LFHAQQGSAEEALVNFTQAEVNAGNILYEHGK-N7H8F1S0G0	N7H8F1S0G0
FUT8 KO	chondroitin sulfate proteoglycan 4	Membrane	WT+FUT8 KO	4	LFHAQQGSAEEALVNFTQAEVNAGNILYEHGK	22	Fucosylated	LFHAQQGSAEEALVNFTQAEVNAGNILYEHGK-N7H8F2S0G0	N7H8F2S0G0
FUT8 KO	chondroitin sulfate proteoglycan 4	Membrane	WT+FUT8 KO	4	VQNFSVPEGGTR	28	High-mannosylated	VQNFSVPEGGTR-N2H6F0S0G0	N2H6F0S0G0
FUT8 KO	chondroitin sulfate proteoglycan 4	Membrane	WT+FUT8 KO	4	VQNFSVPEGGTR	28	High-mannosylated	VQNFSVPEGGTR-N2H7F0S0G0	N2H7F0S0G0
FUT8 KO	chondroitin sulfate proteoglycan 4	Membrane	WT+FUT8 KO	4	VQNFSVPEGGTR	28	High-mannosylated	VQNFSVPEGGTR-N2H8F0S0G0	N2H8F0S0G0
FUT8 KO	chondroitin sulfate proteoglycan 4	Membrane	WT+FUT8 KO	4	VQNFSVPEGGTR	28	High-mannosylated	VQNFSVPEGGTR-N2H9F0S0G0	N2H9F0S0G0
FUT8 KO	chondroitin sulfate proteoglycan 4	Membrane	WT+FUT8 KO	4	VQNFSVPEGGTR	28	Fucosylated	VQNFSVPEGGTR-N4H5F2S0G0	N4H5F2S0G0
FUT8 KO	chondroitin sulfate proteoglycan 4	Membrane	WT+FUT8 KO	4	VQNFSVPEGGTR	28	Complex/Hybrid	VQNFSVPEGGTR-N5H6F0S0G0	N5H6F0S0G0
FUT8 KO	chondroitin sulfate proteoglycan 4	Membrane	WT+FUT8 KO	4	VQNFSVPEGGTR	28	Fucosylated	VQNFSVPEGGTR-N5H6F2S0G0	N5H6F2S0G0
FUT8 KO	chondroitin sulfate proteoglycan 4	Membrane	WT+FUT8 KO	4	VQNFSVPEGGTR	28	Fucosylated	VQNFSVPEGGTR-N5H6F4S0G0	N5H6F4S0G0
FUT8 KO	chondroitin sulfate proteoglycan 4	Membrane	WT+FUT8 KO	4	VQNFSVPEGGTR	28	Complex/Hybrid	VQNFSVPEGGTR-N6H7F0S0G0	N6H7F0S0G0
FUT8 KO	chondroitin sulfate proteoglycan 4	Membrane	WT+FUT8 KO	4	VQNFSVPEGGTR	28	Fucosylated	VQNFSVPEGGTR-N6H7F2S0G0	N6H7F2S0G0
FUT8 KO	chondroitin sulfate proteoglycan 4	Membrane	WT+FUT8 KO	4	VQNFSVPEGGTR	28	Complex/Hybrid	VQNFSVPEGGTR-N7H8F0S0G0	N7H8F0S0G0
FUT8 KO	chondroitin sulfate proteoglycan 4	Membrane	WT+FUT8 KO	4	VQNFSVPEGGTR	28	Sialylated	VQNFSVPEGGTR-N7H8F0S1G0	N7H8F0S1G0
FUT8 KO	chondroitin sulfate proteoglycan 4	Membrane	WT+FUT8 KO	4	VQNFSVPEGGTR	28	Complex/Hybrid	VQNFSVPEGGTR-N8H9F0S0G0	N8H9F0S0G0
FUT8 KO	chondroitin sulfate proteoglycan 4	Membrane	WT+FUT8 KO	4	VQNFSVPEGGTR	28	Sialylated	VQNFSVPEGGTR-N8H9F0S1G0	N8H9F0S1G0
FUT8 KO	chondroitin sulfate proteoglycan 4	Membrane	WT+FUT8 KO	4	YGQLLVGGQPASAFSQMQVDQGEVVFAFTNFSSSQDHFK	9	Fucosylated	YGQLLVGGQPASAFSQMQVDQGEVVFAFTNFSSSQDHFK-N4H5F3S0G0	N4H5F3S0G0
FUT8 KO	chondroitin sulfate proteoglycan 4	Membrane	WT+FUT8 KO	4	YGQLLVGGQPASAFSQMQVDQGEVVFAFTNFSSSQDHFK	9	Fucosylated	YGQLLVGGQPASAFSQMQVDQGEVVFAFTNFSSSQDHFK-N6H6F1S0G0	N6H6F1S0G0
FUT8 KO	chondroitin sulfate proteoglycan 4	Membrane	WT+FUT8 KO	4	YGQLLVGGQPASAFSQMQVDQGEVVFAFTNFSSSQDHFK	9	Complex/Hybrid	YGQLLVGGQPASAFSQMQVDQGEVVFAFTNFSSSQDHFK-N6H7F0S0G0	N6H7F0S0G0
FUT8 KO	chondroitin sulfate proteoglycan 4	Membrane	WT+FUT8 KO	4	YGQLLVGGQPASAFSQMQVDQGEVVFAFTNFSSSQDHFK	9	Fucosylated	YGQLLVGGQPASAFSQMQVDQGEVVFAFTNFSSSQDHFK-N7H7F1S0G0	N7H7F1S0G0
FUT8 KO	chondroitin sulfate proteoglycan 4	Membrane	WT+FUT8 KO	4	YGQLLVGGQPASAFSQMQVDQGEVVFAFTNFSSSQDHFK	9	Fucosylated	YGQLLVGGQPASAFSQMQVDQGEVVFAFTNFSSSQDHFK-N7H7F2S0G0	N7H7F2S0G0
FUT8 KO	chondroitin sulfate proteoglycan 4	Membrane	WT+FUT8 KO	4	YGQLLVGGQPASAFSQMQVDQGEVVFAFTNFSSSQDHFK	9	Fucosylated	YGQLLVGGQPASAFSQMQVDQGEVVFAFTNFSSSQDHFK-N7H7F3S0G0	N7H7F3S0G0
FUT8 KO	chondroitin sulfate proteoglycan 4	Membrane	WT+FUT8 KO	4	YGQLLVGGQPASAFSQMQVDQGEVVFAFTNFSSSQDHFK	9	Fucosylated	YGQLLVGGQPASAFSQMQVDQGEVVFAFTNFSSSQDHFK-N7H8F1S0G0	N7H8F1S0G0
FUT8 KO	chondroitin sulfate proteoglycan 4	Membrane	WT+FUT8 KO	4	YGQLLVGGQPASAFSQMQVDQGEVVFAFTNFSSSQDHFK	9	Fucosylated	YGQLLVGGQPASAFSQMQVDQGEVVFAFTNFSSSQDHFK-N7H8F2S0G0	N7H8F2S0G0
FUT8 KO	chondroitin sulfate proteoglycan 4	Membrane	WT+FUT8 KO	4	YVHDGSETPTDSFVLVANASEMDR	28	High-mannosylated	YVHDGSETPTDSFVLVANASEMDR-N2H6F0S0G0	N2H6F0S0G0
FUT8 KO	chondroitin sulfate proteoglycan 4	Membrane	WT+FUT8 KO	4	YVHDGSETPTDSFVLVANASEMDR	28	High-mannosylated	YVHDGSETPTDSFVLVANASEMDR-N2H8F0S0G0	N2H8F0S0G0
FUT8 KO	chondroitin sulfate proteoglycan 4	Membrane	WT+FUT8 KO	4	YVHDGSETPTDSFVLVANASEMDR	28	High-mannosylated	YVHDGSETPTDSFVLVANASEMDR-N2H9F0S0G0	N2H9F0S0G0
FUT8 KO	chondroitin sulfate proteoglycan 4	Membrane	WT+FUT8 KO	4	YVHDGSETPTDSFVLVANASEMDR	28	Fucosylated	YVHDGSETPTDSFVLVANASEMDR-N4H5F2S0G0	N4H5F2S0G0
FUT8 KO	chondroitin sulfate proteoglycan 4	Membrane	WT+FUT8 KO	4	YVHDGSETPTDSFVLVANASEMDR	28	Fucosylated	YVHDGSETPTDSFVLVANASEMDR-N4H5F3S0G0	N4H5F3S0G0
FUT8 KO	chondroitin sulfate proteoglycan 4	Membrane	WT+FUT8 KO	4	YVHDGSETPTDSFVLVANASEMDR	28	Sialylated	YVHDGSETPTDSFVLVANASEMDR-N5H6F0S3G0	N5H6F0S3G0
FUT8 KO	chondroitin sulfate proteoglycan 4	Membrane	WT+FUT8 KO	4	YVHDGSETPTDSFVLVANASEMDR	28	Fucosylated	YVHDGSETPTDSFVLVANASEMDR-N5H6F3S0G0	N5H6F3S0G0
FUT8 KO	chondroitin sulfate proteoglycan 4	Membrane	WT+FUT8 KO	4	YVHDGSETPTDSFVLVANASEMDR	28	Fucosylated	YVHDGSETPTDSFVLVANASEMDR-N5H6F4S0G0	N5H6F4S0G0
FUT8 KO	chondroitin sulfate proteoglycan 4	Membrane	WT+FUT8 KO	4	YVHDGSETPTDSFVLVANASEMDR	28	Complex/Hybrid	YVHDGSETPTDSFVLVANASEMDR-N6H7F0S0G0	N6H7F0S0G0
FUT8 KO	chondroitin sulfate proteoglycan 4	Membrane	WT+FUT8 KO	4	YVHDGSETPTDSFVLVANASEMDR	28	Fucosylated	YVHDGSETPTDSFVLVANASEMDR-N6H7F4S0G0	N6H7F4S0G0
FUT8 KO	chondroitin sulfate proteoglycan 4	Membrane	WT+FUT8 KO	4	YVHDGSETPTDSFVLVANASEMDR	28	Complex/Hybrid	YVHDGSETPTDSFVLVANASEMDR-N7H8F0S0G0	N7H8F0S0G0
FUT8 KO	chondroitin sulfate proteoglycan 4	Membrane	WT+FUT8 KO	4	YVHDGSETPTDSFVLVANASEMDR	28	Sialylated	YVHDGSETPTDSFVLVANASEMDR-N7H8F0S1G0	N7H8F0S1G0
FUT8 KO	chondroitin sulfate proteoglycan 4	Membrane	WT+FUT8 KO	4	YVHDGSETPTDSFVLVANASEMDR	28	Fucosylated	YVHDGSETPTDSFVLVANASEMDR-N7H8F1S0G0	N7H8F1S0G0
FUT8 KO	chondroitin sulfate proteoglycan 4	Membrane	WT+FUT8 KO	4	YVHDGSETPTDSFVLVANASEMDR	28	Fucosylated	YVHDGSETPTDSFVLVANASEMDR-N7H8F2S0G0	N7H8F2S0G0
FUT8 KO	chondroitin sulfate proteoglycan 4	Membrane	WT+FUT8 KO	4	YVHDGSETPTDSFVLVANASEMDR	28	Sialylated	YVHDGSETPTDSFVLVANASEMDR-N8H9F0S1G0	N8H9F0S1G0
FUT8 KO	chondroitin sulfate proteoglycan 4	Membrane	WT+FUT8 KO	4	YVHDGSETPTDSFVLVANASEMDR	28	Sialylated	YVHDGSETPTDSFVLVANASEMDR-N8H9F0S2G0	N8H9F0S2G0
FUT8 KO	chondroitin sulfate proteoglycan 4	Membrane	WT+FUT8 KO	4	YVHDGSETPTDSFVLVANASEMDR	28	Fucosylated	YVHDGSETPTDSFVLVANASEMDR-N8H9F1S0G0	N8H9F1S0G0
FUT8 KO	chondroitin sulfate proteoglycan 4	Membrane	WT+FUT8 KO	4	YVHDGSETPTDSFVLVANASEMDR	28	Fucosylated	YVHDGSETPTDSFVLVANASEMDR-N8H9F2S0G0	N8H9F2S0G0
FUT8 KO	chondroitin sulfate proteoglycan 4	Membrane	WT+FUT8 KO	4	YVHDGSETPTDSFVLVANASEMDR	28	Fucosylated	YVHDGSETPTDSFVLVANASEMDR-N8H9F4S0G0	N8H9F4S0G0
FUT8 KO	chondroitin sulfate proteoglycan 4	Membrane	WT+FUT8 KO	4	YVHDGSETPTDSFVLVANASEMDR	28	Fucosylated	YVHDGSETPTDSFVLVANASEMDR-N9H9F1S0G0	N9H9F1S0G0
FUT8 KO	chondroitin sulfate synthase 2	Membrane	WT+FUT8 KO	1	ELQLEIQNTSR	5	High-mannosylated	ELQLEIQNTSR-N2H6F0S0G0	N2H6F0S0G0
FUT8 KO	chondroitin sulfate synthase 2	Membrane	WT+FUT8 KO	1	ELQLEIQNTSR	5	High-mannosylated	ELQLEIQNTSR-N2H7F0S0G0	N2H7F0S0G0
FUT8 KO	chondroitin sulfate synthase 2	Membrane	WT+FUT8 KO	1	ELQLEIQNTSR	5	High-mannosylated	ELQLEIQNTSR-N2H8F0S0G0	N2H8F0S0G0
FUT8 KO	chondroitin sulfate synthase 2	Membrane	WT+FUT8 KO	1	ELQLEIQNTSR	5	High-mannosylated	ELQLEIQNTSR-N2H9F0S0G0	N2H9F0S0G0
FUT8 KO	chondroitin sulfate synthase 2	Membrane	WT+FUT8 KO	1	ELQLEIQNTSR	5	Complex/Hybrid	ELQLEIQNTSR-N6H5F0S0G0	N6H5F0S0G0
FUT8 KO	cleft lip and palate transmembrane protein 1	Membrane	WT+FUT8 KO	1	DYYPINESLASLPLR	7	High-mannosylated	DYYPINESLASLPLR-N2H4F0S0G0	N2H4F0S0G0
FUT8 KO	cleft lip and palate transmembrane protein 1	Membrane	WT+FUT8 KO	1	DYYPINESLASLPLR	7	High-mannosylated	DYYPINESLASLPLR-N2H5F0S0G0	N2H5F0S0G0
FUT8 KO	cleft lip and palate transmembrane protein 1	Membrane	WT+FUT8 KO	1	DYYPINESLASLPLR	7	High-mannosylated	DYYPINESLASLPLR-N2H6F0S0G0	N2H6F0S0G0
FUT8 KO	cleft lip and palate transmembrane protein 1	Membrane	WT+FUT8 KO	1	DYYPINESLASLPLR	7	High-mannosylated	DYYPINESLASLPLR-N2H7F0S0G0	N2H7F0S0G0
FUT8 KO	cleft lip and palate transmembrane protein 1	Membrane	WT+FUT8 KO	1	DYYPINESLASLPLR	7	High-mannosylated	DYYPINESLASLPLR-N2H8F0S0G0	N2H8F0S0G0
FUT8 KO	cleft lip and palate transmembrane protein 1	Membrane	WT+FUT8 KO	1	DYYPINESLASLPLR	7	High-mannosylated	DYYPINESLASLPLR-N2H9F0S0G0	N2H9F0S0G0
FUT8 KO	cleft lip and palate transmembrane protein 1	Membrane	WT+FUT8 KO	1	DYYPINESLASLPLR	7	Fucosylated	DYYPINESLASLPLR-N9H10F2S0G0	N9H10F2S0G0
FUT8 KO	clusterin	Extracellular region	WT+FUT8 KO	2	AFPEVCNETMMALWEECKPCLK	2	High-mannosylated	AFPEVCNETMMALWEECKPCLK-N2H8F0S0G0	N2H8F0S0G0
FUT8 KO	clusterin	Extracellular region	WT+FUT8 KO	2	AFPEVCNETMMALWEECKPCLK	2	High-mannosylated	AFPEVCNETMMALWEECKPCLK-N2H9F0S0G0	N2H9F0S0G0
FUT8 KO	clusterin	Extracellular region	WT+FUT8 KO	2	QELNDSLQMAER	3	High-mannosylated	QELNDSLQMAER-N2H8F0S0G0	N2H8F0S0G0
FUT8 KO	clusterin	Extracellular region	WT+FUT8 KO	2	QELNDSLQMAER	3	High-mannosylated	QELNDSLQMAER-N2H9F0S0G0	N2H9F0S0G0
FUT8 KO	clusterin	Extracellular region	WT+FUT8 KO	2	QELNDSLQMAER	3	Complex/Hybrid	QELNDSLQMAER-N5H5F0S0G0	N5H5F0S0G0
FUT8 KO	CMP-N-acetylneuraminate-beta-galactosamide-alpha-2,3-sialyltransferase 1	Membrane	WT+FUT8 KO	2	KTGVHDADFEYNVTTTLEAINK	1	Complex/Hybrid	KTGVHDADFEYNVTTTLEAINK-N6H7F0S0G0	N6H7F0S0G0
FUT8 KO	CMP-N-acetylneuraminate-beta-galactosamide-alpha-2,3-sialyltransferase 1	Membrane	WT+FUT8 KO	2	TGVHDADFEYNVTTTLEAINK	6	High-mannosylated	TGVHDADFEYNVTTTLEAINK-N2H6F0S0G0	N2H6F0S0G0
FUT8 KO	CMP-N-acetylneuraminate-beta-galactosamide-alpha-2,3-sialyltransferase 1	Membrane	WT+FUT8 KO	2	TGVHDADFEYNVTTTLEAINK	6	High-mannosylated	TGVHDADFEYNVTTTLEAINK-N2H7F0S0G0	N2H7F0S0G0
FUT8 KO	CMP-N-acetylneuraminate-beta-galactosamide-alpha-2,3-sialyltransferase 1	Membrane	WT+FUT8 KO	2	TGVHDADFEYNVTTTLEAINK	6	High-mannosylated	TGVHDADFEYNVTTTLEAINK-N2H8F0S0G0	N2H8F0S0G0
FUT8 KO	CMP-N-acetylneuraminate-beta-galactosamide-alpha-2,3-sialyltransferase 1	Membrane	WT+FUT8 KO	2	TGVHDADFEYNVTTTLEAINK	6	Complex/Hybrid	TGVHDADFEYNVTTTLEAINK-N6H5F0S0G0	N6H5F0S0G0
FUT8 KO	CMP-N-acetylneuraminate-beta-galactosamide-alpha-2,3-sialyltransferase 1	Membrane	WT+FUT8 KO	2	TGVHDADFEYNVTTTLEAINK	6	Complex/Hybrid	TGVHDADFEYNVTTTLEAINK-N6H7F0S0G0	N6H7F0S0G0
FUT8 KO	collagen alpha-1(V) chain	Extracellular region	WT+FUT8 KO	4	KNVTLILDCK	3	High-mannosylated	KNVTLILDCK-N2H6F0S0G0	N2H6F0S0G0
FUT8 KO	collagen alpha-1(V) chain	Extracellular region	WT+FUT8 KO	4	KNVTLILDCK	3	High-mannosylated	KNVTLILDCK-N2H8F0S0G0	N2H8F0S0G0
FUT8 KO	collagen alpha-1(V) chain	Extracellular region	WT+FUT8 KO	4	KNVTLILDCK	3	High-mannosylated	KNVTLILDCK-N2H9F0S0G0	N2H9F0S0G0
FUT8 KO	collagen alpha-1(V) chain	Extracellular region	WT+FUT8 KO	4	NVTLILDCK	6	High-mannosylated	NVTLILDCK-N2H6F0S0G0	N2H6F0S0G0
FUT8 KO	collagen alpha-1(V) chain	Extracellular region	WT+FUT8 KO	4	NVTLILDCK	6	High-mannosylated	NVTLILDCK-N2H8F0S0G0	N2H8F0S0G0
FUT8 KO	collagen alpha-1(V) chain	Extracellular region	WT+FUT8 KO	4	NVTLILDCK	6	High-mannosylated	NVTLILDCK-N2H9F0S0G0	N2H9F0S0G0
FUT8 KO	collagen alpha-1(V) chain	Extracellular region	WT+FUT8 KO	4	NVTLILDCK	6	Sialylated	NVTLILDCK-N4H5F0S2G0	N4H5F0S2G0
FUT8 KO	collagen alpha-1(V) chain	Extracellular region	WT+FUT8 KO	4	NVTLILDCK	6	Fucosylated	NVTLILDCK-N4H5F2S0G0	N4H5F2S0G0
FUT8 KO	collagen alpha-1(V) chain	Extracellular region	WT+FUT8 KO	4	VYCNFTAGGSTCVFPDKK	5	High-mannosylated	VYCNFTAGGSTCVFPDKK-N2H4F0S0G0	N2H4F0S0G0
FUT8 KO	collagen alpha-1(V) chain	Extracellular region	WT+FUT8 KO	4	VYCNFTAGGSTCVFPDKK	5	High-mannosylated	VYCNFTAGGSTCVFPDKK-N2H6F0S0G0	N2H6F0S0G0
FUT8 KO	collagen alpha-1(V) chain	Extracellular region	WT+FUT8 KO	4	VYCNFTAGGSTCVFPDKK	5	High-mannosylated	VYCNFTAGGSTCVFPDKK-N2H7F0S0G0	N2H7F0S0G0
FUT8 KO	collagen alpha-1(V) chain	Extracellular region	WT+FUT8 KO	4	VYCNFTAGGSTCVFPDKK	5	High-mannosylated	VYCNFTAGGSTCVFPDKK-N2H8F0S0G0	N2H8F0S0G0
FUT8 KO	collagen alpha-1(V) chain	Extracellular region	WT+FUT8 KO	4	VYCNFTAGGSTCVFPDKK	5	High-mannosylated	VYCNFTAGGSTCVFPDKK-N2H9F0S0G0	N2H9F0S0G0
FUT8 KO	collagen alpha-1(V) chain	Extracellular region	WT+FUT8 KO	4	VYCNFTAGGSTCVFPDK	2	High-mannosylated	VYCNFTAGGSTCVFPDK-N2H8F0S0G0	N2H8F0S0G0
FUT8 KO	collagen alpha-1(V) chain	Extracellular region	WT+FUT8 KO	4	VYCNFTAGGSTCVFPDK	2	High-mannosylated	VYCNFTAGGSTCVFPDK-N2H9F0S0G0	N2H9F0S0G0
FUT8 KO	collagen alpha-1(VI) chain	Membrane	WT+FUT8 KO	1	NITAQICIDKK	4	High-mannosylated	NITAQICIDKK-N2H6F0S0G0	N2H6F0S0G0
FUT8 KO	collagen alpha-1(VI) chain	Membrane	WT+FUT8 KO	1	NITAQICIDKK	4	High-mannosylated	NITAQICIDKK-N2H7F0S0G0	N2H7F0S0G0
FUT8 KO	collagen alpha-1(VI) chain	Membrane	WT+FUT8 KO	1	NITAQICIDKK	4	High-mannosylated	NITAQICIDKK-N2H8F0S0G0	N2H8F0S0G0
FUT8 KO	collagen alpha-1(VI) chain	Membrane	WT+FUT8 KO	1	NITAQICIDKK	4	High-mannosylated	NITAQICIDKK-N2H9F0S0G0	N2H9F0S0G0
FUT8 KO	collagen alpha-1(XII) chain	Extracellular region	WT+FUT8 KO	2	EAGNITTDGYEILGK	7	High-mannosylated	EAGNITTDGYEILGK-N2H4F0S0G0	N2H4F0S0G0
FUT8 KO	collagen alpha-1(XII) chain	Extracellular region	WT+FUT8 KO	2	EAGNITTDGYEILGK	7	High-mannosylated	EAGNITTDGYEILGK-N2H5F0S0G0	N2H5F0S0G0
FUT8 KO	collagen alpha-1(XII) chain	Extracellular region	WT+FUT8 KO	2	EAGNITTDGYEILGK	7	High-mannosylated	EAGNITTDGYEILGK-N2H6F0S0G0	N2H6F0S0G0
FUT8 KO	collagen alpha-1(XII) chain	Extracellular region	WT+FUT8 KO	2	EAGNITTDGYEILGK	7	High-mannosylated	EAGNITTDGYEILGK-N2H7F0S0G0	N2H7F0S0G0
FUT8 KO	collagen alpha-1(XII) chain	Extracellular region	WT+FUT8 KO	2	EAGNITTDGYEILGK	7	High-mannosylated	EAGNITTDGYEILGK-N2H8F0S0G0	N2H8F0S0G0
FUT8 KO	collagen alpha-1(XII) chain	Extracellular region	WT+FUT8 KO	2	EAGNITTDGYEILGK	7	High-mannosylated	EAGNITTDGYEILGK-N2H9F0S0G0	N2H9F0S0G0
FUT8 KO	collagen alpha-1(XII) chain	Extracellular region	WT+FUT8 KO	2	NLQVYNATSNSLTVK	5	High-mannosylated	NLQVYNATSNSLTVK-N2H4F0S0G0	N2H4F0S0G0
FUT8 KO	collagen alpha-1(XII) chain	Extracellular region	WT+FUT8 KO	2	NLQVYNATSNSLTVK	5	High-mannosylated	NLQVYNATSNSLTVK-N2H6F0S0G0	N2H6F0S0G0
FUT8 KO	collagen alpha-1(XII) chain	Extracellular region	WT+FUT8 KO	2	NLQVYNATSNSLTVK	5	High-mannosylated	NLQVYNATSNSLTVK-N2H7F0S0G0	N2H7F0S0G0
FUT8 KO	collagen alpha-1(XII) chain	Extracellular region	WT+FUT8 KO	2	NLQVYNATSNSLTVK	5	High-mannosylated	NLQVYNATSNSLTVK-N2H8F0S0G0	N2H8F0S0G0
FUT8 KO	collagen alpha-1(XII) chain	Extracellular region	WT+FUT8 KO	2	NLQVYNATSNSLTVK	5	High-mannosylated	NLQVYNATSNSLTVK-N2H9F0S0G0	N2H9F0S0G0
FUT8 KO	collagen alpha-1(XVI) chain	Extracellular region	WT+FUT8 KO	1	LEHSSDPSTNVTGFNLIR	5	High-mannosylated	LEHSSDPSTNVTGFNLIR-N2H5F0S0G0	N2H5F0S0G0
FUT8 KO	collagen alpha-1(XVI) chain	Extracellular region	WT+FUT8 KO	1	LEHSSDPSTNVTGFNLIR	5	High-mannosylated	LEHSSDPSTNVTGFNLIR-N2H6F0S0G0	N2H6F0S0G0
FUT8 KO	collagen alpha-1(XVI) chain	Extracellular region	WT+FUT8 KO	1	LEHSSDPSTNVTGFNLIR	5	High-mannosylated	LEHSSDPSTNVTGFNLIR-N2H7F0S0G0	N2H7F0S0G0
FUT8 KO	collagen alpha-1(XVI) chain	Extracellular region	WT+FUT8 KO	1	LEHSSDPSTNVTGFNLIR	5	High-mannosylated	LEHSSDPSTNVTGFNLIR-N2H8F0S0G0	N2H8F0S0G0
FUT8 KO	collagen alpha-1(XVI) chain	Extracellular region	WT+FUT8 KO	1	LEHSSDPSTNVTGFNLIR	5	High-mannosylated	LEHSSDPSTNVTGFNLIR-N2H9F0S0G0	N2H9F0S0G0
FUT8 KO	complement C1s subcomponent	Extracellular region	WT+FUT8 KO	2	CAANGSWVNDELGIELPK	3	High-mannosylated	CAANGSWVNDELGIELPK-N2H9F0S0G0	N2H9F0S0G0
FUT8 KO	complement C1s subcomponent	Extracellular region	WT+FUT8 KO	2	CAANGSWVNDELGIELPK	3	Complex/Hybrid	CAANGSWVNDELGIELPK-N5H4F0S0G0	N5H4F0S0G0
FUT8 KO	complement C1s subcomponent	Extracellular region	WT+FUT8 KO	2	CAANGSWVNDELGIELPK	3	Complex/Hybrid	CAANGSWVNDELGIELPK-N5H5F0S0G0	N5H5F0S0G0
FUT8 KO	complement C1s subcomponent	Extracellular region	WT+FUT8 KO	2	NCGVNCSGNVFTALIGEISSPNYPSPYPENSR	3	High-mannosylated	NCGVNCSGNVFTALIGEISSPNYPSPYPENSR-N2H6F0S0G0	N2H6F0S0G0
FUT8 KO	complement C1s subcomponent	Extracellular region	WT+FUT8 KO	2	NCGVNCSGNVFTALIGEISSPNYPSPYPENSR	3	High-mannosylated	NCGVNCSGNVFTALIGEISSPNYPSPYPENSR-N2H8F0S0G0	N2H8F0S0G0
FUT8 KO	complement C1s subcomponent	Extracellular region	WT+FUT8 KO	2	NCGVNCSGNVFTALIGEISSPNYPSPYPENSR	3	Complex/Hybrid	NCGVNCSGNVFTALIGEISSPNYPSPYPENSR-N6H7F0S0G0	N6H7F0S0G0
FUT8 KO	complement component receptor 1-like protein	Membrane	WT+FUT8 KO	4	CQSNASWVPSLGK	25	High-mannosylated	CQSNASWVPSLGK-N2H5F0S0G0	N2H5F0S0G0
FUT8 KO	complement component receptor 1-like protein	Membrane	WT+FUT8 KO	4	CQSNASWVPSLGK	25	High-mannosylated	CQSNASWVPSLGK-N2H6F0S0G0	N2H6F0S0G0
FUT8 KO	complement component receptor 1-like protein	Membrane	WT+FUT8 KO	4	CQSNASWVPSLGK	25	High-mannosylated	CQSNASWVPSLGK-N2H7F0S0G0	N2H7F0S0G0
FUT8 KO	complement component receptor 1-like protein	Membrane	WT+FUT8 KO	4	CQSNASWVPSLGK	25	High-mannosylated	CQSNASWVPSLGK-N2H8F0S0G0	N2H8F0S0G0
FUT8 KO	complement component receptor 1-like protein	Membrane	WT+FUT8 KO	4	CQSNASWVPSLGK	25	High-mannosylated	CQSNASWVPSLGK-N2H9F0S0G0	N2H9F0S0G0
FUT8 KO	complement component receptor 1-like protein	Membrane	WT+FUT8 KO	4	CQSNASWVPSLGK	25	Complex/Hybrid	CQSNASWVPSLGK-N4H5F0S0G0	N4H5F0S0G0
FUT8 KO	complement component receptor 1-like protein	Membrane	WT+FUT8 KO	4	CQSNASWVPSLGK	25	Sialylated	CQSNASWVPSLGK-N4H5F0S1G0	N4H5F0S1G0
FUT8 KO	complement component receptor 1-like protein	Membrane	WT+FUT8 KO	4	CQSNASWVPSLGK	25	Fucosylated	CQSNASWVPSLGK-N4H5F2S0G0	N4H5F2S0G0
FUT8 KO	complement component receptor 1-like protein	Membrane	WT+FUT8 KO	4	CQSNASWVPSLGK	25	Complex/Hybrid	CQSNASWVPSLGK-N5H5F0S0G0	N5H5F0S0G0
FUT8 KO	complement component receptor 1-like protein	Membrane	WT+FUT8 KO	4	CQSNASWVPSLGK	25	Complex/Hybrid	CQSNASWVPSLGK-N5H6F0S0G0	N5H6F0S0G0
FUT8 KO	complement component receptor 1-like protein	Membrane	WT+FUT8 KO	4	CQSNASWVPSLGK	25	Fucosylated	CQSNASWVPSLGK-N5H6F1S0G0	N5H6F1S0G0
FUT8 KO	complement component receptor 1-like protein	Membrane	WT+FUT8 KO	4	CQSNASWVPSLGK	25	Fucosylated	CQSNASWVPSLGK-N5H6F2S0G0	N5H6F2S0G0
FUT8 KO	complement component receptor 1-like protein	Membrane	WT+FUT8 KO	4	CQSNASWVPSLGK	25	Fucosylated	CQSNASWVPSLGK-N5H6F3S0G0	N5H6F3S0G0
FUT8 KO	complement component receptor 1-like protein	Membrane	WT+FUT8 KO	4	CQSNASWVPSLGK	25	Fucosylated	CQSNASWVPSLGK-N6H4F1S0G0	N6H4F1S0G0
FUT8 KO	complement component receptor 1-like protein	Membrane	WT+FUT8 KO	4	CQSNASWVPSLGK	25	Fucosylated	CQSNASWVPSLGK-N6H5F1S0G0	N6H5F1S0G0
FUT8 KO	complement component receptor 1-like protein	Membrane	WT+FUT8 KO	4	CQSNASWVPSLGK	25	Complex/Hybrid	CQSNASWVPSLGK-N6H7F0S0G0	N6H7F0S0G0
FUT8 KO	complement component receptor 1-like protein	Membrane	WT+FUT8 KO	4	CQSNASWVPSLGK	25	Complex/Hybrid	CQSNASWVPSLGK-N7H8F0S0G0	N7H8F0S0G0
FUT8 KO	complement component receptor 1-like protein	Membrane	WT+FUT8 KO	4	ESIWNSSVPVCEK	24	High-mannosylated	ESIWNSSVPVCEK-N2H10F0S0G0	N2H10F0S0G0
FUT8 KO	complement component receptor 1-like protein	Membrane	WT+FUT8 KO	4	ESIWNSSVPVCEK	24	High-mannosylated	ESIWNSSVPVCEK-N2H6F0S0G0	N2H6F0S0G0
FUT8 KO	complement component receptor 1-like protein	Membrane	WT+FUT8 KO	4	ESIWNSSVPVCEK	24	High-mannosylated	ESIWNSSVPVCEK-N2H7F0S0G0	N2H7F0S0G0
FUT8 KO	complement component receptor 1-like protein	Membrane	WT+FUT8 KO	4	ESIWNSSVPVCEK	24	High-mannosylated	ESIWNSSVPVCEK-N2H8F0S0G0	N2H8F0S0G0
FUT8 KO	complement component receptor 1-like protein	Membrane	WT+FUT8 KO	4	ESIWNSSVPVCEK	24	High-mannosylated	ESIWNSSVPVCEK-N2H9F0S0G0	N2H9F0S0G0
FUT8 KO	complement component receptor 1-like protein	Membrane	WT+FUT8 KO	4	ESIWNSSVPVCEK	24	Fucosylated	ESIWNSSVPVCEK-N4H3F1S0G0	N4H3F1S0G0
FUT8 KO	complement component receptor 1-like protein	Membrane	WT+FUT8 KO	4	ESIWNSSVPVCEK	24	Fucosylated	ESIWNSSVPVCEK-N4H4F1S0G0	N4H4F1S0G0
FUT8 KO	complement component receptor 1-like protein	Membrane	WT+FUT8 KO	4	ESIWNSSVPVCEK	24	Complex/Hybrid	ESIWNSSVPVCEK-N4H5F0S0G0	N4H5F0S0G0
FUT8 KO	complement component receptor 1-like protein	Membrane	WT+FUT8 KO	4	ESIWNSSVPVCEK	24	Sialylated	ESIWNSSVPVCEK-N4H5F0S1G0	N4H5F0S1G0
FUT8 KO	complement component receptor 1-like protein	Membrane	WT+FUT8 KO	4	ESIWNSSVPVCEK	24	Sialylated	ESIWNSSVPVCEK-N4H5F0S2G0	N4H5F0S2G0
FUT8 KO	complement component receptor 1-like protein	Membrane	WT+FUT8 KO	4	ESIWNSSVPVCEK	24	Fucosylated	ESIWNSSVPVCEK-N4H5F1S0G0	N4H5F1S0G0
FUT8 KO	complement component receptor 1-like protein	Membrane	WT+FUT8 KO	4	ESIWNSSVPVCEK	24	Fucosylated	ESIWNSSVPVCEK-N4H5F2S0G0	N4H5F2S0G0
FUT8 KO	complement component receptor 1-like protein	Membrane	WT+FUT8 KO	4	ESIWNSSVPVCEK	24	Fucosylated	ESIWNSSVPVCEK-N4H5F3S0G0	N4H5F3S0G0
FUT8 KO	complement component receptor 1-like protein	Membrane	WT+FUT8 KO	4	ESIWNSSVPVCEK	24	Complex/Hybrid	ESIWNSSVPVCEK-N5H6F0S0G0	N5H6F0S0G0
FUT8 KO	complement component receptor 1-like protein	Membrane	WT+FUT8 KO	4	ESIWNSSVPVCEK	24	Fucosylated	ESIWNSSVPVCEK-N5H6F1S0G0	N5H6F1S0G0
FUT8 KO	complement component receptor 1-like protein	Membrane	WT+FUT8 KO	4	ESIWNSSVPVCEK	24	Fucosylated	ESIWNSSVPVCEK-N5H6F2S0G0	N5H6F2S0G0
FUT8 KO	complement component receptor 1-like protein	Membrane	WT+FUT8 KO	4	ESIWNSSVPVCEK	24	Complex/Hybrid	ESIWNSSVPVCEK-N6H5F0S0G0	N6H5F0S0G0
FUT8 KO	complement component receptor 1-like protein	Membrane	WT+FUT8 KO	4	ESIWNSSVPVCEK	24	Complex/Hybrid	ESIWNSSVPVCEK-N6H7F0S0G0	N6H7F0S0G0
FUT8 KO	complement component receptor 1-like protein	Membrane	WT+FUT8 KO	4	ESIWNSSVPVCEK	24	Complex/Hybrid	ESIWNSSVPVCEK-N9H9F0S0G0	N9H9F0S0G0
FUT8 KO	complement component receptor 1-like protein	Membrane	WT+FUT8 KO	4	KQCETPQDPNNGVVHVLTDTQFGSVINYTCNAGYR	9	Sialylated	KQCETPQDPNNGVVHVLTDTQFGSVINYTCNAGYR-N4H5F0S2G0	N4H5F0S2G0
FUT8 KO	complement component receptor 1-like protein	Membrane	WT+FUT8 KO	4	KQCETPQDPNNGVVHVLTDTQFGSVINYTCNAGYR	9	Fucosylated	KQCETPQDPNNGVVHVLTDTQFGSVINYTCNAGYR-N4H5F2S0G0	N4H5F2S0G0
FUT8 KO	complement component receptor 1-like protein	Membrane	WT+FUT8 KO	4	KQCETPQDPNNGVVHVLTDTQFGSVINYTCNAGYR	9	Fucosylated	KQCETPQDPNNGVVHVLTDTQFGSVINYTCNAGYR-N4H5F3S0G0	N4H5F3S0G0
FUT8 KO	complement component receptor 1-like protein	Membrane	WT+FUT8 KO	4	KQCETPQDPNNGVVHVLTDTQFGSVINYTCNAGYR	9	Fucosylated	KQCETPQDPNNGVVHVLTDTQFGSVINYTCNAGYR-N5H6F4S0G0	N5H6F4S0G0
FUT8 KO	complement component receptor 1-like protein	Membrane	WT+FUT8 KO	4	KQCETPQDPNNGVVHVLTDTQFGSVINYTCNAGYR	9	Complex/Hybrid	KQCETPQDPNNGVVHVLTDTQFGSVINYTCNAGYR-N6H7F0S0G0	N6H7F0S0G0
FUT8 KO	complement component receptor 1-like protein	Membrane	WT+FUT8 KO	4	KQCETPQDPNNGVVHVLTDTQFGSVINYTCNAGYR	9	Fucosylated	KQCETPQDPNNGVVHVLTDTQFGSVINYTCNAGYR-N7H8F1S0G0	N7H8F1S0G0
FUT8 KO	complement component receptor 1-like protein	Membrane	WT+FUT8 KO	4	KQCETPQDPNNGVVHVLTDTQFGSVINYTCNAGYR	9	Fucosylated	KQCETPQDPNNGVVHVLTDTQFGSVINYTCNAGYR-N7H8F2S0G0	N7H8F2S0G0
FUT8 KO	complement component receptor 1-like protein	Membrane	WT+FUT8 KO	4	QCETPQDPNNGVVHVLTDTQFGSVINYTCNAGYR	2	Fucosylated	QCETPQDPNNGVVHVLTDTQFGSVINYTCNAGYR-N4H5F3S0G0	N4H5F3S0G0
FUT8 KO	complement component receptor 1-like protein	Membrane	WT+FUT8 KO	4	QCETPQDPNNGVVHVLTDTQFGSVINYTCNAGYR	2	Complex/Hybrid	QCETPQDPNNGVVHVLTDTQFGSVINYTCNAGYR-N6H7F0S0G0	N6H7F0S0G0
FUT8 KO	contactin-1	Membrane	WT+FUT8 KO	5	ANSTGTLVITNPTR	4	High-mannosylated	ANSTGTLVITNPTR-N2H9F0S0G0	N2H9F0S0G0
FUT8 KO	contactin-1	Membrane	WT+FUT8 KO	5	ANSTGTLVITNPTR	4	Sialylated	ANSTGTLVITNPTR-N4H5F0S1G0	N4H5F0S1G0
FUT8 KO	contactin-1	Membrane	WT+FUT8 KO	5	ANSTGTLVITNPTR	4	Fucosylated	ANSTGTLVITNPTR-N4H5F2S0G0	N4H5F2S0G0
FUT8 KO	contactin-1	Membrane	WT+FUT8 KO	5	DIYTMMGQNVTLECFALGNPVPDIR	2	High-mannosylated	DIYTMMGQNVTLECFALGNPVPDIR-N2H8F0S0G0	N2H8F0S0G0
FUT8 KO	contactin-1	Membrane	WT+FUT8 KO	5	DIYTMMGQNVTLECFALGNPVPDIR	2	Sialylated	DIYTMMGQNVTLECFALGNPVPDIR-N4H5F0S2G0	N4H5F0S2G0
FUT8 KO	contactin-1	Membrane	WT+FUT8 KO	5	GNYSCFVSSPSITK	3	High-mannosylated	GNYSCFVSSPSITK-N2H8F0S0G0	N2H8F0S0G0
FUT8 KO	contactin-1	Membrane	WT+FUT8 KO	5	GNYSCFVSSPSITK	3	High-mannosylated	GNYSCFVSSPSITK-N2H9F0S0G0	N2H9F0S0G0
FUT8 KO	contactin-1	Membrane	WT+FUT8 KO	5	YIITWDHVVALSNESTVTGYK	4	High-mannosylated	YIITWDHVVALSNESTVTGYK-N2H5F0S0G0	N2H5F0S0G0
FUT8 KO	contactin-1	Membrane	WT+FUT8 KO	5	YIITWDHVVALSNESTVTGYK	4	High-mannosylated	YIITWDHVVALSNESTVTGYK-N2H6F0S0G0	N2H6F0S0G0
FUT8 KO	contactin-1	Membrane	WT+FUT8 KO	5	YIITWDHVVALSNESTVTGYK	4	High-mannosylated	YIITWDHVVALSNESTVTGYK-N2H8F0S0G0	N2H8F0S0G0
FUT8 KO	contactin-1	Membrane	WT+FUT8 KO	5	YIITWDHVVALSNESTVTGYK	4	Fucosylated	YIITWDHVVALSNESTVTGYK-N4H5F3S0G0	N4H5F3S0G0
FUT8 KO	contactin-1	Membrane	WT+FUT8 KO	5	YTCTAQTIVDNSSASADLVVR	4	High-mannosylated	YTCTAQTIVDNSSASADLVVR-N2H5F0S0G0	N2H5F0S0G0
FUT8 KO	contactin-1	Membrane	WT+FUT8 KO	5	YTCTAQTIVDNSSASADLVVR	4	High-mannosylated	YTCTAQTIVDNSSASADLVVR-N2H6F0S0G0	N2H6F0S0G0
FUT8 KO	contactin-1	Membrane	WT+FUT8 KO	5	YTCTAQTIVDNSSASADLVVR	4	High-mannosylated	YTCTAQTIVDNSSASADLVVR-N2H9F0S0G0	N2H9F0S0G0
FUT8 KO	contactin-1	Membrane	WT+FUT8 KO	5	YTCTAQTIVDNSSASADLVVR	4	Complex/Hybrid	YTCTAQTIVDNSSASADLVVR-N4H5F0S0G0	N4H5F0S0G0
FUT8 KO	contactin-associated protein 1	Membrane	WT+FUT8 KO	5	ANHSLDVSFYFR	5	High-mannosylated	ANHSLDVSFYFR-N2H10F0S0G0	N2H10F0S0G0
FUT8 KO	contactin-associated protein 1	Membrane	WT+FUT8 KO	5	ANHSLDVSFYFR	5	High-mannosylated	ANHSLDVSFYFR-N2H6F0S0G0	N2H6F0S0G0
FUT8 KO	contactin-associated protein 1	Membrane	WT+FUT8 KO	5	ANHSLDVSFYFR	5	High-mannosylated	ANHSLDVSFYFR-N2H7F0S0G0	N2H7F0S0G0
FUT8 KO	contactin-associated protein 1	Membrane	WT+FUT8 KO	5	ANHSLDVSFYFR	5	High-mannosylated	ANHSLDVSFYFR-N2H8F0S0G0	N2H8F0S0G0
FUT8 KO	contactin-associated protein 1	Membrane	WT+FUT8 KO	5	ANHSLDVSFYFR	5	High-mannosylated	ANHSLDVSFYFR-N2H9F0S0G0	N2H9F0S0G0
FUT8 KO	contactin-associated protein 1	Membrane	WT+FUT8 KO	5	EANLTLDGYVHR	5	High-mannosylated	EANLTLDGYVHR-N2H4F0S0G0	N2H4F0S0G0
FUT8 KO	contactin-associated protein 1	Membrane	WT+FUT8 KO	5	EANLTLDGYVHR	5	High-mannosylated	EANLTLDGYVHR-N2H6F0S0G0	N2H6F0S0G0
FUT8 KO	contactin-associated protein 1	Membrane	WT+FUT8 KO	5	EANLTLDGYVHR	5	High-mannosylated	EANLTLDGYVHR-N2H7F0S0G0	N2H7F0S0G0
FUT8 KO	contactin-associated protein 1	Membrane	WT+FUT8 KO	5	EANLTLDGYVHR	5	High-mannosylated	EANLTLDGYVHR-N2H8F0S0G0	N2H8F0S0G0
FUT8 KO	contactin-associated protein 1	Membrane	WT+FUT8 KO	5	EANLTLDGYVHR	5	High-mannosylated	EANLTLDGYVHR-N2H9F0S0G0	N2H9F0S0G0
FUT8 KO	contactin-associated protein 1	Membrane	WT+FUT8 KO	5	TSGNFTIDPDGSGPLKPFVVYCDIR	4	High-mannosylated	TSGNFTIDPDGSGPLKPFVVYCDIR-N2H7F0S0G0	N2H7F0S0G0
FUT8 KO	contactin-associated protein 1	Membrane	WT+FUT8 KO	5	TSGNFTIDPDGSGPLKPFVVYCDIR	4	High-mannosylated	TSGNFTIDPDGSGPLKPFVVYCDIR-N2H8F0S0G0	N2H8F0S0G0
FUT8 KO	contactin-associated protein 1	Membrane	WT+FUT8 KO	5	TSGNFTIDPDGSGPLKPFVVYCDIR	4	High-mannosylated	TSGNFTIDPDGSGPLKPFVVYCDIR-N2H9F0S0G0	N2H9F0S0G0
FUT8 KO	contactin-associated protein 1	Membrane	WT+FUT8 KO	5	TSGNFTIDPDGSGPLKPFVVYCDIR	4	Complex/Hybrid	TSGNFTIDPDGSGPLKPFVVYCDIR-N6H5F0S0G0	N6H5F0S0G0
FUT8 KO	contactin-associated protein 1	Membrane	WT+FUT8 KO	5	VDGQLVNLTLVEFR	6	High-mannosylated	VDGQLVNLTLVEFR-N2H10F0S0G0	N2H10F0S0G0
FUT8 KO	contactin-associated protein 1	Membrane	WT+FUT8 KO	5	VDGQLVNLTLVEFR	6	High-mannosylated	VDGQLVNLTLVEFR-N2H6F0S0G0	N2H6F0S0G0
FUT8 KO	contactin-associated protein 1	Membrane	WT+FUT8 KO	5	VDGQLVNLTLVEFR	6	High-mannosylated	VDGQLVNLTLVEFR-N2H7F0S0G0	N2H7F0S0G0
FUT8 KO	contactin-associated protein 1	Membrane	WT+FUT8 KO	5	VDGQLVNLTLVEFR	6	High-mannosylated	VDGQLVNLTLVEFR-N2H8F0S0G0	N2H8F0S0G0
FUT8 KO	contactin-associated protein 1	Membrane	WT+FUT8 KO	5	VDGQLVNLTLVEFR	6	High-mannosylated	VDGQLVNLTLVEFR-N2H9F0S0G0	N2H9F0S0G0
FUT8 KO	contactin-associated protein 1	Membrane	WT+FUT8 KO	5	VDGQLVNLTLVEFR	6	Complex/Hybrid	VDGQLVNLTLVEFR-N5H5F0S0G0	N5H5F0S0G0
FUT8 KO	contactin-associated protein 1	Membrane	WT+FUT8 KO	5	WGCHSNQTAFHGCMELLK	3	High-mannosylated	WGCHSNQTAFHGCMELLK-N2H10F0S0G0	N2H10F0S0G0
FUT8 KO	contactin-associated protein 1	Membrane	WT+FUT8 KO	5	WGCHSNQTAFHGCMELLK	3	High-mannosylated	WGCHSNQTAFHGCMELLK-N2H9F0S0G0	N2H9F0S0G0
FUT8 KO	contactin-associated protein 1	Membrane	WT+FUT8 KO	5	WGCHSNQTAFHGCMELLK	3	Complex/Hybrid	WGCHSNQTAFHGCMELLK-N6H5F0S0G0	N6H5F0S0G0
FUT8 KO	C-type lectin domain family 2 member D11-like	Membrane	WT+FUT8 KO	1	VENWTSSQTFCVAQGAQLAR	5	High-mannosylated	VENWTSSQTFCVAQGAQLAR-N2H3F0S0G0	N2H3F0S0G0
FUT8 KO	C-type lectin domain family 2 member D11-like	Membrane	WT+FUT8 KO	1	VENWTSSQTFCVAQGAQLAR	5	High-mannosylated	VENWTSSQTFCVAQGAQLAR-N2H6F0S0G0	N2H6F0S0G0
FUT8 KO	C-type lectin domain family 2 member D11-like	Membrane	WT+FUT8 KO	1	VENWTSSQTFCVAQGAQLAR	5	High-mannosylated	VENWTSSQTFCVAQGAQLAR-N2H7F0S0G0	N2H7F0S0G0
FUT8 KO	C-type lectin domain family 2 member D11-like	Membrane	WT+FUT8 KO	1	VENWTSSQTFCVAQGAQLAR	5	High-mannosylated	VENWTSSQTFCVAQGAQLAR-N2H8F0S0G0	N2H8F0S0G0
FUT8 KO	C-type lectin domain family 2 member D11-like	Membrane	WT+FUT8 KO	1	VENWTSSQTFCVAQGAQLAR	5	High-mannosylated	VENWTSSQTFCVAQGAQLAR-N2H9F0S0G0	N2H9F0S0G0
FUT8 KO	C-type lectin domain family 2 member H-like	Membrane	WT+FUT8 KO	1	SSEHHWMWTDGTEYNNLTSPR	3	High-mannosylated	SSEHHWMWTDGTEYNNLTSPR-N2H6F0S0G0	N2H6F0S0G0
FUT8 KO	C-type lectin domain family 2 member H-like	Membrane	WT+FUT8 KO	1	SSEHHWMWTDGTEYNNLTSPR	3	High-mannosylated	SSEHHWMWTDGTEYNNLTSPR-N2H8F0S0G0	N2H8F0S0G0
FUT8 KO	C-type lectin domain family 2 member H-like	Membrane	WT+FUT8 KO	1	SSEHHWMWTDGTEYNNLTSPR	3	High-mannosylated	SSEHHWMWTDGTEYNNLTSPR-N2H9F0S0G0	N2H9F0S0G0
FUT8 KO	cysteine-rich motor neuron 1 protein	Membrane	WT+FUT8 KO	1	TQDSCCPQCTDEPLQPSTSHNESVPSYCK	4	High-mannosylated	TQDSCCPQCTDEPLQPSTSHNESVPSYCK-N2H5F0S0G0	N2H5F0S0G0
FUT8 KO	cysteine-rich motor neuron 1 protein	Membrane	WT+FUT8 KO	1	TQDSCCPQCTDEPLQPSTSHNESVPSYCK	4	High-mannosylated	TQDSCCPQCTDEPLQPSTSHNESVPSYCK-N2H7F0S0G0	N2H7F0S0G0
FUT8 KO	cysteine-rich motor neuron 1 protein	Membrane	WT+FUT8 KO	1	TQDSCCPQCTDEPLQPSTSHNESVPSYCK	4	High-mannosylated	TQDSCCPQCTDEPLQPSTSHNESVPSYCK-N2H8F0S0G0	N2H8F0S0G0
FUT8 KO	cysteine-rich motor neuron 1 protein	Membrane	WT+FUT8 KO	1	TQDSCCPQCTDEPLQPSTSHNESVPSYCK	4	Complex/Hybrid	TQDSCCPQCTDEPLQPSTSHNESVPSYCK-N6H7F0S0G0	N6H7F0S0G0
FUT8 KO	cysteine-rich with EGF-like domain protein 1	Membrane	WT+FUT8 KO	1	NSSHLVCSACFGPCAR	11	High-mannosylated	NSSHLVCSACFGPCAR-N2H3F0S0G0	N2H3F0S0G0
FUT8 KO	cysteine-rich with EGF-like domain protein 1	Membrane	WT+FUT8 KO	1	NSSHLVCSACFGPCAR	11	Fucosylated	NSSHLVCSACFGPCAR-N2H3F1S0G0	N2H3F1S0G0
FUT8 KO	cysteine-rich with EGF-like domain protein 1	Membrane	WT+FUT8 KO	1	NSSHLVCSACFGPCAR	11	High-mannosylated	NSSHLVCSACFGPCAR-N2H4F0S0G0	N2H4F0S0G0
FUT8 KO	cysteine-rich with EGF-like domain protein 1	Membrane	WT+FUT8 KO	1	NSSHLVCSACFGPCAR	11	High-mannosylated	NSSHLVCSACFGPCAR-N2H5F0S0G0	N2H5F0S0G0
FUT8 KO	cysteine-rich with EGF-like domain protein 1	Membrane	WT+FUT8 KO	1	NSSHLVCSACFGPCAR	11	Fucosylated	NSSHLVCSACFGPCAR-N2H5F1S0G0	N2H5F1S0G0
FUT8 KO	cysteine-rich with EGF-like domain protein 1	Membrane	WT+FUT8 KO	1	NSSHLVCSACFGPCAR	11	High-mannosylated	NSSHLVCSACFGPCAR-N2H6F0S0G0	N2H6F0S0G0
FUT8 KO	cysteine-rich with EGF-like domain protein 1	Membrane	WT+FUT8 KO	1	NSSHLVCSACFGPCAR	11	High-mannosylated	NSSHLVCSACFGPCAR-N2H7F0S0G0	N2H7F0S0G0
FUT8 KO	cysteine-rich with EGF-like domain protein 1	Membrane	WT+FUT8 KO	1	NSSHLVCSACFGPCAR	11	High-mannosylated	NSSHLVCSACFGPCAR-N2H8F0S0G0	N2H8F0S0G0
FUT8 KO	cysteine-rich with EGF-like domain protein 1	Membrane	WT+FUT8 KO	1	NSSHLVCSACFGPCAR	11	High-mannosylated	NSSHLVCSACFGPCAR-N2H9F0S0G0	N2H9F0S0G0
FUT8 KO	cysteine-rich with EGF-like domain protein 1	Membrane	WT+FUT8 KO	1	NSSHLVCSACFGPCAR	11	Complex/Hybrid	NSSHLVCSACFGPCAR-N3H3F0S0G0	N3H3F0S0G0
FUT8 KO	decorin	Extracellular region	WT+FUT8 KO	3	IADTNITAIPQGLPPSLTELHLDGNK	7	High-mannosylated	IADTNITAIPQGLPPSLTELHLDGNK-N2H6F0S0G0	N2H6F0S0G0
FUT8 KO	decorin	Extracellular region	WT+FUT8 KO	3	IADTNITAIPQGLPPSLTELHLDGNK	7	High-mannosylated	IADTNITAIPQGLPPSLTELHLDGNK-N2H7F0S0G0	N2H7F0S0G0
FUT8 KO	decorin	Extracellular region	WT+FUT8 KO	3	IADTNITAIPQGLPPSLTELHLDGNK	7	High-mannosylated	IADTNITAIPQGLPPSLTELHLDGNK-N2H8F0S0G0	N2H8F0S0G0
FUT8 KO	decorin	Extracellular region	WT+FUT8 KO	3	IADTNITAIPQGLPPSLTELHLDGNK	7	High-mannosylated	IADTNITAIPQGLPPSLTELHLDGNK-N2H9F0S0G0	N2H9F0S0G0
FUT8 KO	decorin	Extracellular region	WT+FUT8 KO	3	IADTNITAIPQGLPPSLTELHLDGNK	7	Complex/Hybrid	IADTNITAIPQGLPPSLTELHLDGNK-N6H5F0S0G0	N6H5F0S0G0
FUT8 KO	decorin	Extracellular region	WT+FUT8 KO	3	LGLSFNSISAIDNGTLANTPHLR	10	High-mannosylated	LGLSFNSISAIDNGTLANTPHLR-N2H10F0S0G0	N2H10F0S0G0
FUT8 KO	decorin	Extracellular region	WT+FUT8 KO	3	LGLSFNSISAIDNGTLANTPHLR	10	High-mannosylated	LGLSFNSISAIDNGTLANTPHLR-N2H6F0S0G0	N2H6F0S0G0
FUT8 KO	decorin	Extracellular region	WT+FUT8 KO	3	LGLSFNSISAIDNGTLANTPHLR	10	High-mannosylated	LGLSFNSISAIDNGTLANTPHLR-N2H7F0S0G0	N2H7F0S0G0
FUT8 KO	decorin	Extracellular region	WT+FUT8 KO	3	LGLSFNSISAIDNGTLANTPHLR	10	High-mannosylated	LGLSFNSISAIDNGTLANTPHLR-N2H8F0S0G0	N2H8F0S0G0
FUT8 KO	decorin	Extracellular region	WT+FUT8 KO	3	LGLSFNSISAIDNGTLANTPHLR	10	High-mannosylated	LGLSFNSISAIDNGTLANTPHLR-N2H9F0S0G0	N2H9F0S0G0
FUT8 KO	decorin	Extracellular region	WT+FUT8 KO	3	LGLSFNSISAIDNGTLANTPHLR	10	Fucosylated	LGLSFNSISAIDNGTLANTPHLR-N4H5F3S0G0	N4H5F3S0G0
FUT8 KO	decorin	Extracellular region	WT+FUT8 KO	3	LGLSFNSISAIDNGTLANTPHLR	10	Complex/Hybrid	LGLSFNSISAIDNGTLANTPHLR-N6H5F0S0G0	N6H5F0S0G0
FUT8 KO	decorin	Extracellular region	WT+FUT8 KO	3	LGLSFNSISAIDNGTLANTPHLR	10	Complex/Hybrid	LGLSFNSISAIDNGTLANTPHLR-N6H7F0S0G0	N6H7F0S0G0
FUT8 KO	decorin	Extracellular region	WT+FUT8 KO	3	YIQVVYLHNNNISAVGSNDFCPPGYNTK	5	High-mannosylated	YIQVVYLHNNNISAVGSNDFCPPGYNTK-N2H6F0S0G0	N2H6F0S0G0
FUT8 KO	decorin	Extracellular region	WT+FUT8 KO	3	YIQVVYLHNNNISAVGSNDFCPPGYNTK	5	High-mannosylated	YIQVVYLHNNNISAVGSNDFCPPGYNTK-N2H7F0S0G0	N2H7F0S0G0
FUT8 KO	decorin	Extracellular region	WT+FUT8 KO	3	YIQVVYLHNNNISAVGSNDFCPPGYNTK	5	High-mannosylated	YIQVVYLHNNNISAVGSNDFCPPGYNTK-N2H8F0S0G0	N2H8F0S0G0
FUT8 KO	decorin	Extracellular region	WT+FUT8 KO	3	YIQVVYLHNNNISAVGSNDFCPPGYNTK	5	Complex/Hybrid	YIQVVYLHNNNISAVGSNDFCPPGYNTK-N6H7F0S0G0	N6H7F0S0G0
FUT8 KO	decorin	Extracellular region	WT+FUT8 KO	3	YIQVVYLHNNNISAVGSNDFCPPGYNTK	5	Fucosylated	YIQVVYLHNNNISAVGSNDFCPPGYNTK-N7H8F2S0G0	N7H8F2S0G0
FUT8 KO	deoxyribonuclease-2-alpha	Membrane	WT+FUT8 KO	2	DGVGYINSSEGAVGR	11	High-mannosylated	DGVGYINSSEGAVGR-N2H10F0S0G0	N2H10F0S0G0
FUT8 KO	deoxyribonuclease-2-alpha	Membrane	WT+FUT8 KO	2	DGVGYINSSEGAVGR	11	High-mannosylated	DGVGYINSSEGAVGR-N2H3F0S0G0	N2H3F0S0G0
FUT8 KO	deoxyribonuclease-2-alpha	Membrane	WT+FUT8 KO	2	DGVGYINSSEGAVGR	11	Fucosylated	DGVGYINSSEGAVGR-N2H3F1S0G0	N2H3F1S0G0
FUT8 KO	deoxyribonuclease-2-alpha	Membrane	WT+FUT8 KO	2	DGVGYINSSEGAVGR	11	High-mannosylated	DGVGYINSSEGAVGR-N2H4F0S0G0	N2H4F0S0G0
FUT8 KO	deoxyribonuclease-2-alpha	Membrane	WT+FUT8 KO	2	DGVGYINSSEGAVGR	11	High-mannosylated	DGVGYINSSEGAVGR-N2H5F0S0G0	N2H5F0S0G0
FUT8 KO	deoxyribonuclease-2-alpha	Membrane	WT+FUT8 KO	2	DGVGYINSSEGAVGR	11	High-mannosylated	DGVGYINSSEGAVGR-N2H6F0S0G0	N2H6F0S0G0
FUT8 KO	deoxyribonuclease-2-alpha	Membrane	WT+FUT8 KO	2	DGVGYINSSEGAVGR	11	High-mannosylated	DGVGYINSSEGAVGR-N2H7F0S0G0	N2H7F0S0G0
FUT8 KO	deoxyribonuclease-2-alpha	Membrane	WT+FUT8 KO	2	DGVGYINSSEGAVGR	11	High-mannosylated	DGVGYINSSEGAVGR-N2H8F0S0G0	N2H8F0S0G0
FUT8 KO	deoxyribonuclease-2-alpha	Membrane	WT+FUT8 KO	2	DGVGYINSSEGAVGR	11	High-mannosylated	DGVGYINSSEGAVGR-N2H9F0S0G0	N2H9F0S0G0
FUT8 KO	deoxyribonuclease-2-alpha	Membrane	WT+FUT8 KO	2	DGVGYINSSEGAVGR	11	Complex/Hybrid	DGVGYINSSEGAVGR-N6H5F0S0G0	N6H5F0S0G0
FUT8 KO	deoxyribonuclease-2-alpha	Membrane	WT+FUT8 KO	2	DGVGYINSSEGAVGR	11	Fucosylated	DGVGYINSSEGAVGR-N6H6F1S0G0	N6H6F1S0G0
FUT8 KO	deoxyribonuclease-2-alpha	Membrane	WT+FUT8 KO	2	DNSSQLAFLLYNDQPPK	9	High-mannosylated	DNSSQLAFLLYNDQPPK-N2H10F0S0G0	N2H10F0S0G0
FUT8 KO	deoxyribonuclease-2-alpha	Membrane	WT+FUT8 KO	2	DNSSQLAFLLYNDQPPK	9	High-mannosylated	DNSSQLAFLLYNDQPPK-N2H3F0S0G0	N2H3F0S0G0
FUT8 KO	deoxyribonuclease-2-alpha	Membrane	WT+FUT8 KO	2	DNSSQLAFLLYNDQPPK	9	High-mannosylated	DNSSQLAFLLYNDQPPK-N2H4F0S0G0	N2H4F0S0G0
FUT8 KO	deoxyribonuclease-2-alpha	Membrane	WT+FUT8 KO	2	DNSSQLAFLLYNDQPPK	9	High-mannosylated	DNSSQLAFLLYNDQPPK-N2H5F0S0G0	N2H5F0S0G0
FUT8 KO	deoxyribonuclease-2-alpha	Membrane	WT+FUT8 KO	2	DNSSQLAFLLYNDQPPK	9	High-mannosylated	DNSSQLAFLLYNDQPPK-N2H6F0S0G0	N2H6F0S0G0
FUT8 KO	deoxyribonuclease-2-alpha	Membrane	WT+FUT8 KO	2	DNSSQLAFLLYNDQPPK	9	High-mannosylated	DNSSQLAFLLYNDQPPK-N2H7F0S0G0	N2H7F0S0G0
FUT8 KO	deoxyribonuclease-2-alpha	Membrane	WT+FUT8 KO	2	DNSSQLAFLLYNDQPPK	9	High-mannosylated	DNSSQLAFLLYNDQPPK-N2H8F0S0G0	N2H8F0S0G0
FUT8 KO	deoxyribonuclease-2-alpha	Membrane	WT+FUT8 KO	2	DNSSQLAFLLYNDQPPK	9	High-mannosylated	DNSSQLAFLLYNDQPPK-N2H9F0S0G0	N2H9F0S0G0
FUT8 KO	deoxyribonuclease-2-alpha	Membrane	WT+FUT8 KO	2	DNSSQLAFLLYNDQPPK	9	Complex/Hybrid	DNSSQLAFLLYNDQPPK-N6H5F0S0G0	N6H5F0S0G0
FUT8 KO	D-glucuronyl C5-epimerase	Membrane	WT+FUT8 KO	1	NLTEKPPHIEVYETAEER	7	High-mannosylated	NLTEKPPHIEVYETAEER-N2H6F0S0G0	N2H6F0S0G0
FUT8 KO	D-glucuronyl C5-epimerase	Membrane	WT+FUT8 KO	1	NLTEKPPHIEVYETAEER	7	High-mannosylated	NLTEKPPHIEVYETAEER-N2H9F0S0G0	N2H9F0S0G0
FUT8 KO	D-glucuronyl C5-epimerase	Membrane	WT+FUT8 KO	1	NLTEKPPHIEVYETAEER	7	Sialylated	NLTEKPPHIEVYETAEER-N4H5F0S2G0	N4H5F0S2G0
FUT8 KO	D-glucuronyl C5-epimerase	Membrane	WT+FUT8 KO	1	NLTEKPPHIEVYETAEER	7	Fucosylated	NLTEKPPHIEVYETAEER-N4H5F2S0G0	N4H5F2S0G0
FUT8 KO	D-glucuronyl C5-epimerase	Membrane	WT+FUT8 KO	1	NLTEKPPHIEVYETAEER	7	Complex/Hybrid	NLTEKPPHIEVYETAEER-N5H4F0S0G0	N5H4F0S0G0
FUT8 KO	D-glucuronyl C5-epimerase	Membrane	WT+FUT8 KO	1	NLTEKPPHIEVYETAEER	7	Complex/Hybrid	NLTEKPPHIEVYETAEER-N6H5F0S0G0	N6H5F0S0G0
FUT8 KO	dickkopf-related protein 3	Extracellular region	WT+FUT8 KO	1	TSSEVNLSSLPANYHNETNTDAR	7	High-mannosylated	TSSEVNLSSLPANYHNETNTDAR-N2H4F0S0G0	N2H4F0S0G0
FUT8 KO	dickkopf-related protein 3	Extracellular region	WT+FUT8 KO	1	TSSEVNLSSLPANYHNETNTDAR	7	High-mannosylated	TSSEVNLSSLPANYHNETNTDAR-N2H5F0S0G0	N2H5F0S0G0
FUT8 KO	dickkopf-related protein 3	Extracellular region	WT+FUT8 KO	1	TSSEVNLSSLPANYHNETNTDAR	7	High-mannosylated	TSSEVNLSSLPANYHNETNTDAR-N2H6F0S0G0	N2H6F0S0G0
FUT8 KO	dickkopf-related protein 3	Extracellular region	WT+FUT8 KO	1	TSSEVNLSSLPANYHNETNTDAR	7	High-mannosylated	TSSEVNLSSLPANYHNETNTDAR-N2H7F0S0G0	N2H7F0S0G0
FUT8 KO	dickkopf-related protein 3	Extracellular region	WT+FUT8 KO	1	TSSEVNLSSLPANYHNETNTDAR	7	High-mannosylated	TSSEVNLSSLPANYHNETNTDAR-N2H8F0S0G0	N2H8F0S0G0
FUT8 KO	dickkopf-related protein 3	Extracellular region	WT+FUT8 KO	1	TSSEVNLSSLPANYHNETNTDAR	7	High-mannosylated	TSSEVNLSSLPANYHNETNTDAR-N2H9F0S0G0	N2H9F0S0G0
FUT8 KO	dickkopf-related protein 3	Extracellular region	WT+FUT8 KO	1	TSSEVNLSSLPANYHNETNTDAR	7	Fucosylated	TSSEVNLSSLPANYHNETNTDAR-N4H3F1S0G0	N4H3F1S0G0
FUT8 KO	dipeptidyl peptidase 2	Lysosome	WT+FUT8 KO	2	ALVGLVYNSSGMEPCFDIYR	7	High-mannosylated	ALVGLVYNSSGMEPCFDIYR-N2H4F0S0G0	N2H4F0S0G0
FUT8 KO	dipeptidyl peptidase 2	Lysosome	WT+FUT8 KO	2	ALVGLVYNSSGMEPCFDIYR	7	High-mannosylated	ALVGLVYNSSGMEPCFDIYR-N2H5F0S0G0	N2H5F0S0G0
FUT8 KO	dipeptidyl peptidase 2	Lysosome	WT+FUT8 KO	2	ALVGLVYNSSGMEPCFDIYR	7	High-mannosylated	ALVGLVYNSSGMEPCFDIYR-N2H6F0S0G0	N2H6F0S0G0
FUT8 KO	dipeptidyl peptidase 2	Lysosome	WT+FUT8 KO	2	ALVGLVYNSSGMEPCFDIYR	7	High-mannosylated	ALVGLVYNSSGMEPCFDIYR-N2H7F0S0G0	N2H7F0S0G0
FUT8 KO	dipeptidyl peptidase 2	Lysosome	WT+FUT8 KO	2	ALVGLVYNSSGMEPCFDIYR	7	High-mannosylated	ALVGLVYNSSGMEPCFDIYR-N2H8F0S0G0	N2H8F0S0G0
FUT8 KO	dipeptidyl peptidase 2	Lysosome	WT+FUT8 KO	2	ALVGLVYNSSGMEPCFDIYR	7	High-mannosylated	ALVGLVYNSSGMEPCFDIYR-N2H9F0S0G0	N2H9F0S0G0
FUT8 KO	dipeptidyl peptidase 2	Lysosome	WT+FUT8 KO	2	ALVGLVYNSSGMEPCFDIYR	7	Complex/Hybrid	ALVGLVYNSSGMEPCFDIYR-N6H5F0S0G0	N6H5F0S0G0
FUT8 KO	dipeptidyl peptidase 2	Lysosome	WT+FUT8 KO	2	ENYFEQYMDHFNFESFGNK	4	High-mannosylated	ENYFEQYMDHFNFESFGNK-N2H3F0S0G0	N2H3F0S0G0
FUT8 KO	dipeptidyl peptidase 2	Lysosome	WT+FUT8 KO	2	ENYFEQYMDHFNFESFGNK	4	High-mannosylated	ENYFEQYMDHFNFESFGNK-N2H5F0S0G0	N2H5F0S0G0
FUT8 KO	dipeptidyl peptidase 2	Lysosome	WT+FUT8 KO	2	ENYFEQYMDHFNFESFGNK	4	High-mannosylated	ENYFEQYMDHFNFESFGNK-N2H6F0S0G0	N2H6F0S0G0
FUT8 KO	dipeptidyl peptidase 2	Lysosome	WT+FUT8 KO	2	ENYFEQYMDHFNFESFGNK	4	Fucosylated	ENYFEQYMDHFNFESFGNK-N6H4F1S0G0	N6H4F1S0G0
FUT8 KO	disintegrin and metalloproteinase domain-containing protein 10	Membrane	WT+FUT8 KO	3	EGICNGFTALCPASDPKPNFTDCNR	4	High-mannosylated	EGICNGFTALCPASDPKPNFTDCNR-N2H8F0S0G0	N2H8F0S0G0
FUT8 KO	disintegrin and metalloproteinase domain-containing protein 10	Membrane	WT+FUT8 KO	3	EGICNGFTALCPASDPKPNFTDCNR	4	High-mannosylated	EGICNGFTALCPASDPKPNFTDCNR-N2H9F0S0G0	N2H9F0S0G0
FUT8 KO	disintegrin and metalloproteinase domain-containing protein 10	Membrane	WT+FUT8 KO	3	EGICNGFTALCPASDPKPNFTDCNR	4	Fucosylated	EGICNGFTALCPASDPKPNFTDCNR-N4H5F2S0G0	N4H5F2S0G0
FUT8 KO	disintegrin and metalloproteinase domain-containing protein 10	Membrane	WT+FUT8 KO	3	EGICNGFTALCPASDPKPNFTDCNR	4	Complex/Hybrid	EGICNGFTALCPASDPKPNFTDCNR-N6H7F0S0G0	N6H7F0S0G0
FUT8 KO	disintegrin and metalloproteinase domain-containing protein 10	Membrane	WT+FUT8 KO	3	INTTSDEKDPTNPFR	7	High-mannosylated	INTTSDEKDPTNPFR-N2H10F0S0G0	N2H10F0S0G0
FUT8 KO	disintegrin and metalloproteinase domain-containing protein 10	Membrane	WT+FUT8 KO	3	INTTSDEKDPTNPFR	7	High-mannosylated	INTTSDEKDPTNPFR-N2H4F0S0G0	N2H4F0S0G0
FUT8 KO	disintegrin and metalloproteinase domain-containing protein 10	Membrane	WT+FUT8 KO	3	INTTSDEKDPTNPFR	7	High-mannosylated	INTTSDEKDPTNPFR-N2H5F0S0G0	N2H5F0S0G0
FUT8 KO	disintegrin and metalloproteinase domain-containing protein 10	Membrane	WT+FUT8 KO	3	INTTSDEKDPTNPFR	7	High-mannosylated	INTTSDEKDPTNPFR-N2H6F0S0G0	N2H6F0S0G0
FUT8 KO	disintegrin and metalloproteinase domain-containing protein 10	Membrane	WT+FUT8 KO	3	INTTSDEKDPTNPFR	7	High-mannosylated	INTTSDEKDPTNPFR-N2H7F0S0G0	N2H7F0S0G0
FUT8 KO	disintegrin and metalloproteinase domain-containing protein 10	Membrane	WT+FUT8 KO	3	INTTSDEKDPTNPFR	7	High-mannosylated	INTTSDEKDPTNPFR-N2H8F0S0G0	N2H8F0S0G0
FUT8 KO	disintegrin and metalloproteinase domain-containing protein 10	Membrane	WT+FUT8 KO	3	INTTSDEKDPTNPFR	7	High-mannosylated	INTTSDEKDPTNPFR-N2H9F0S0G0	N2H9F0S0G0
FUT8 KO	disintegrin and metalloproteinase domain-containing protein 10	Membrane	WT+FUT8 KO	3	NISQVLEK	3	High-mannosylated	NISQVLEK-N2H6F0S0G0	N2H6F0S0G0
FUT8 KO	disintegrin and metalloproteinase domain-containing protein 10	Membrane	WT+FUT8 KO	3	NISQVLEK	3	High-mannosylated	NISQVLEK-N2H8F0S0G0	N2H8F0S0G0
FUT8 KO	disintegrin and metalloproteinase domain-containing protein 10	Membrane	WT+FUT8 KO	3	NISQVLEK	3	High-mannosylated	NISQVLEK-N2H9F0S0G0	N2H9F0S0G0
FUT8 KO	disintegrin and metalloproteinase domain-containing protein 15	Membrane	WT+FUT8 KO	1	SPNGSYVPCTPGDAICGQLQCQR	15	High-mannosylated	SPNGSYVPCTPGDAICGQLQCQR-N2H10F0S0G0	N2H10F0S0G0
FUT8 KO	disintegrin and metalloproteinase domain-containing protein 15	Membrane	WT+FUT8 KO	1	SPNGSYVPCTPGDAICGQLQCQR	15	High-mannosylated	SPNGSYVPCTPGDAICGQLQCQR-N2H8F0S0G0	N2H8F0S0G0
FUT8 KO	disintegrin and metalloproteinase domain-containing protein 15	Membrane	WT+FUT8 KO	1	SPNGSYVPCTPGDAICGQLQCQR	15	High-mannosylated	SPNGSYVPCTPGDAICGQLQCQR-N2H9F0S0G0	N2H9F0S0G0
FUT8 KO	disintegrin and metalloproteinase domain-containing protein 15	Membrane	WT+FUT8 KO	1	SPNGSYVPCTPGDAICGQLQCQR	15	Sialylated	SPNGSYVPCTPGDAICGQLQCQR-N4H5F0S2G0	N4H5F0S2G0
FUT8 KO	disintegrin and metalloproteinase domain-containing protein 15	Membrane	WT+FUT8 KO	1	SPNGSYVPCTPGDAICGQLQCQR	15	Fucosylated	SPNGSYVPCTPGDAICGQLQCQR-N4H5F1S0G0	N4H5F1S0G0
FUT8 KO	disintegrin and metalloproteinase domain-containing protein 15	Membrane	WT+FUT8 KO	1	SPNGSYVPCTPGDAICGQLQCQR	15	Fucosylated	SPNGSYVPCTPGDAICGQLQCQR-N4H5F2S0G0	N4H5F2S0G0
FUT8 KO	disintegrin and metalloproteinase domain-containing protein 15	Membrane	WT+FUT8 KO	1	SPNGSYVPCTPGDAICGQLQCQR	15	Fucosylated	SPNGSYVPCTPGDAICGQLQCQR-N4H5F3S0G0	N4H5F3S0G0
FUT8 KO	disintegrin and metalloproteinase domain-containing protein 15	Membrane	WT+FUT8 KO	1	SPNGSYVPCTPGDAICGQLQCQR	15	Fucosylated	SPNGSYVPCTPGDAICGQLQCQR-N5H6F4S0G0	N5H6F4S0G0
FUT8 KO	disintegrin and metalloproteinase domain-containing protein 15	Membrane	WT+FUT8 KO	1	SPNGSYVPCTPGDAICGQLQCQR	15	Complex/Hybrid	SPNGSYVPCTPGDAICGQLQCQR-N6H5F0S0G0	N6H5F0S0G0
FUT8 KO	disintegrin and metalloproteinase domain-containing protein 15	Membrane	WT+FUT8 KO	1	SPNGSYVPCTPGDAICGQLQCQR	15	Complex/Hybrid	SPNGSYVPCTPGDAICGQLQCQR-N6H7F0S0G0	N6H7F0S0G0
FUT8 KO	disintegrin and metalloproteinase domain-containing protein 15	Membrane	WT+FUT8 KO	1	SPNGSYVPCTPGDAICGQLQCQR	15	Complex/Hybrid	SPNGSYVPCTPGDAICGQLQCQR-N7H8F0S0G0	N7H8F0S0G0
FUT8 KO	disintegrin and metalloproteinase domain-containing protein 17	Membrane	WT+FUT8 KO	4	GESYCTGNSSECPPPGDAEDDTVCLDLGK	7	High-mannosylated	GESYCTGNSSECPPPGDAEDDTVCLDLGK-N2H5F0S0G0	N2H5F0S0G0
FUT8 KO	disintegrin and metalloproteinase domain-containing protein 17	Membrane	WT+FUT8 KO	4	GESYCTGNSSECPPPGDAEDDTVCLDLGK	7	High-mannosylated	GESYCTGNSSECPPPGDAEDDTVCLDLGK-N2H6F0S0G0	N2H6F0S0G0
FUT8 KO	disintegrin and metalloproteinase domain-containing protein 17	Membrane	WT+FUT8 KO	4	GESYCTGNSSECPPPGDAEDDTVCLDLGK	7	High-mannosylated	GESYCTGNSSECPPPGDAEDDTVCLDLGK-N2H7F0S0G0	N2H7F0S0G0
FUT8 KO	disintegrin and metalloproteinase domain-containing protein 17	Membrane	WT+FUT8 KO	4	GESYCTGNSSECPPPGDAEDDTVCLDLGK	7	High-mannosylated	GESYCTGNSSECPPPGDAEDDTVCLDLGK-N2H8F0S0G0	N2H8F0S0G0
FUT8 KO	disintegrin and metalloproteinase domain-containing protein 17	Membrane	WT+FUT8 KO	4	GESYCTGNSSECPPPGDAEDDTVCLDLGK	7	High-mannosylated	GESYCTGNSSECPPPGDAEDDTVCLDLGK-N2H9F0S0G0	N2H9F0S0G0
FUT8 KO	disintegrin and metalloproteinase domain-containing protein 17	Membrane	WT+FUT8 KO	4	GESYCTGNSSECPPPGDAEDDTVCLDLGK	7	Complex/Hybrid	GESYCTGNSSECPPPGDAEDDTVCLDLGK-N6H7F0S0G0	N6H7F0S0G0
FUT8 KO	disintegrin and metalloproteinase domain-containing protein 17	Membrane	WT+FUT8 KO	4	NLSGPCVPYVDAEQK	7	High-mannosylated	NLSGPCVPYVDAEQK-N2H10F0S0G0	N2H10F0S0G0
FUT8 KO	disintegrin and metalloproteinase domain-containing protein 17	Membrane	WT+FUT8 KO	4	NLSGPCVPYVDAEQK	7	High-mannosylated	NLSGPCVPYVDAEQK-N2H7F0S0G0	N2H7F0S0G0
FUT8 KO	disintegrin and metalloproteinase domain-containing protein 17	Membrane	WT+FUT8 KO	4	NLSGPCVPYVDAEQK	7	High-mannosylated	NLSGPCVPYVDAEQK-N2H8F0S0G0	N2H8F0S0G0
FUT8 KO	disintegrin and metalloproteinase domain-containing protein 17	Membrane	WT+FUT8 KO	4	NLSGPCVPYVDAEQK	7	High-mannosylated	NLSGPCVPYVDAEQK-N2H9F0S0G0	N2H9F0S0G0
FUT8 KO	disintegrin and metalloproteinase domain-containing protein 17	Membrane	WT+FUT8 KO	4	NLSGPCVPYVDAEQK	7	Complex/Hybrid	NLSGPCVPYVDAEQK-N6H5F0S0G0	N6H5F0S0G0
FUT8 KO	disintegrin and metalloproteinase domain-containing protein 17	Membrane	WT+FUT8 KO	4	NLSGPCVPYVDAEQK	7	Fucosylated	NLSGPCVPYVDAEQK-N9H10F2S0G0	N9H10F2S0G0
FUT8 KO	disintegrin and metalloproteinase domain-containing protein 17	Membrane	WT+FUT8 KO	4	NTSWDNAGFK	4	High-mannosylated	NTSWDNAGFK-N2H5F0S0G0	N2H5F0S0G0
FUT8 KO	disintegrin and metalloproteinase domain-containing protein 17	Membrane	WT+FUT8 KO	4	NTSWDNAGFK	4	High-mannosylated	NTSWDNAGFK-N2H7F0S0G0	N2H7F0S0G0
FUT8 KO	disintegrin and metalloproteinase domain-containing protein 17	Membrane	WT+FUT8 KO	4	NTSWDNAGFK	4	High-mannosylated	NTSWDNAGFK-N2H8F0S0G0	N2H8F0S0G0
FUT8 KO	disintegrin and metalloproteinase domain-containing protein 17	Membrane	WT+FUT8 KO	4	NTSWDNAGFK	4	High-mannosylated	NTSWDNAGFK-N2H9F0S0G0	N2H9F0S0G0
FUT8 KO	disintegrin and metalloproteinase domain-containing protein 17	Membrane	WT+FUT8 KO	4	VDEGEECDPGIMYLNNDTCCNSDCTLKPGVQCSDR	6	High-mannosylated	VDEGEECDPGIMYLNNDTCCNSDCTLKPGVQCSDR-N2H6F0S0G0	N2H6F0S0G0
FUT8 KO	disintegrin and metalloproteinase domain-containing protein 17	Membrane	WT+FUT8 KO	4	VDEGEECDPGIMYLNNDTCCNSDCTLKPGVQCSDR	6	High-mannosylated	VDEGEECDPGIMYLNNDTCCNSDCTLKPGVQCSDR-N2H8F0S0G0	N2H8F0S0G0
FUT8 KO	disintegrin and metalloproteinase domain-containing protein 17	Membrane	WT+FUT8 KO	4	VDEGEECDPGIMYLNNDTCCNSDCTLKPGVQCSDR	6	High-mannosylated	VDEGEECDPGIMYLNNDTCCNSDCTLKPGVQCSDR-N2H9F0S0G0	N2H9F0S0G0
FUT8 KO	disintegrin and metalloproteinase domain-containing protein 17	Membrane	WT+FUT8 KO	4	VDEGEECDPGIMYLNNDTCCNSDCTLKPGVQCSDR	6	Complex/Hybrid	VDEGEECDPGIMYLNNDTCCNSDCTLKPGVQCSDR-N4H5F0S0G0	N4H5F0S0G0
FUT8 KO	disintegrin and metalloproteinase domain-containing protein 17	Membrane	WT+FUT8 KO	4	VDEGEECDPGIMYLNNDTCCNSDCTLKPGVQCSDR	6	Sialylated	VDEGEECDPGIMYLNNDTCCNSDCTLKPGVQCSDR-N4H5F0S1G0	N4H5F0S1G0
FUT8 KO	disintegrin and metalloproteinase domain-containing protein 19	Membrane	WT+FUT8 KO	2	GLITVTSNLSYIIEPVPDSGSQHR	3	High-mannosylated	GLITVTSNLSYIIEPVPDSGSQHR-N2H5F0S0G0	N2H5F0S0G0
FUT8 KO	disintegrin and metalloproteinase domain-containing protein 19	Membrane	WT+FUT8 KO	2	GLITVTSNLSYIIEPVPDSGSQHR	3	High-mannosylated	GLITVTSNLSYIIEPVPDSGSQHR-N2H6F0S0G0	N2H6F0S0G0
FUT8 KO	disintegrin and metalloproteinase domain-containing protein 19	Membrane	WT+FUT8 KO	2	GLITVTSNLSYIIEPVPDSGSQHR	3	High-mannosylated	GLITVTSNLSYIIEPVPDSGSQHR-N2H7F0S0G0	N2H7F0S0G0
FUT8 KO	disintegrin and metalloproteinase domain-containing protein 19	Membrane	WT+FUT8 KO	2	NTSFFETEGCGK	10	High-mannosylated	NTSFFETEGCGK-N2H10F0S0G0	N2H10F0S0G0
FUT8 KO	disintegrin and metalloproteinase domain-containing protein 19	Membrane	WT+FUT8 KO	2	NTSFFETEGCGK	10	High-mannosylated	NTSFFETEGCGK-N2H9F0S0G0	N2H9F0S0G0
FUT8 KO	disintegrin and metalloproteinase domain-containing protein 19	Membrane	WT+FUT8 KO	2	NTSFFETEGCGK	10	Complex/Hybrid	NTSFFETEGCGK-N4H5F0S0G0	N4H5F0S0G0
FUT8 KO	disintegrin and metalloproteinase domain-containing protein 19	Membrane	WT+FUT8 KO	2	NTSFFETEGCGK	10	Sialylated	NTSFFETEGCGK-N4H5F0S1G0	N4H5F0S1G0
FUT8 KO	disintegrin and metalloproteinase domain-containing protein 19	Membrane	WT+FUT8 KO	2	NTSFFETEGCGK	10	Fucosylated	NTSFFETEGCGK-N4H5F2S0G0	N4H5F2S0G0
FUT8 KO	disintegrin and metalloproteinase domain-containing protein 19	Membrane	WT+FUT8 KO	2	NTSFFETEGCGK	10	Fucosylated	NTSFFETEGCGK-N5H6F2S0G0	N5H6F2S0G0
FUT8 KO	disintegrin and metalloproteinase domain-containing protein 19	Membrane	WT+FUT8 KO	2	NTSFFETEGCGK	10	Complex/Hybrid	NTSFFETEGCGK-N6H7F0S0G0	N6H7F0S0G0
FUT8 KO	disintegrin and metalloproteinase domain-containing protein 9	Membrane	WT+FUT8 KO	4	NFQCVNASVLNYDCDIQKK	4	Complex/Hybrid	NFQCVNASVLNYDCDIQKK-N4H5F0S0G0	N4H5F0S0G0
FUT8 KO	disintegrin and metalloproteinase domain-containing protein 9	Membrane	WT+FUT8 KO	4	NFQCVNASVLNYDCDIQKK	4	Fucosylated	NFQCVNASVLNYDCDIQKK-N4H5F2S0G0	N4H5F2S0G0
FUT8 KO	disintegrin and metalloproteinase domain-containing protein 9	Membrane	WT+FUT8 KO	4	NFQCVNASVLNYDCDIQKK	4	Fucosylated	NFQCVNASVLNYDCDIQKK-N4H5F3S0G0	N4H5F3S0G0
FUT8 KO	disintegrin and metalloproteinase domain-containing protein 9	Membrane	WT+FUT8 KO	4	NFQCVNASVLNYDCDIQKK	4	Complex/Hybrid	NFQCVNASVLNYDCDIQKK-N6H7F0S0G0	N6H7F0S0G0
FUT8 KO	disintegrin and metalloproteinase domain-containing protein 9	Membrane	WT+FUT8 KO	4	NFQCVNASVLNYDCDIQK	20	High-mannosylated	NFQCVNASVLNYDCDIQK-N2H10F0S0G0	N2H10F0S0G0
FUT8 KO	disintegrin and metalloproteinase domain-containing protein 9	Membrane	WT+FUT8 KO	4	NFQCVNASVLNYDCDIQK	20	High-mannosylated	NFQCVNASVLNYDCDIQK-N2H6F0S0G0	N2H6F0S0G0
FUT8 KO	disintegrin and metalloproteinase domain-containing protein 9	Membrane	WT+FUT8 KO	4	NFQCVNASVLNYDCDIQK	20	High-mannosylated	NFQCVNASVLNYDCDIQK-N2H7F0S0G0	N2H7F0S0G0
FUT8 KO	disintegrin and metalloproteinase domain-containing protein 9	Membrane	WT+FUT8 KO	4	NFQCVNASVLNYDCDIQK	20	High-mannosylated	NFQCVNASVLNYDCDIQK-N2H8F0S0G0	N2H8F0S0G0
FUT8 KO	disintegrin and metalloproteinase domain-containing protein 9	Membrane	WT+FUT8 KO	4	NFQCVNASVLNYDCDIQK	20	High-mannosylated	NFQCVNASVLNYDCDIQK-N2H9F0S0G0	N2H9F0S0G0
FUT8 KO	disintegrin and metalloproteinase domain-containing protein 9	Membrane	WT+FUT8 KO	4	NFQCVNASVLNYDCDIQK	20	Complex/Hybrid	NFQCVNASVLNYDCDIQK-N4H5F0S0G0	N4H5F0S0G0
FUT8 KO	disintegrin and metalloproteinase domain-containing protein 9	Membrane	WT+FUT8 KO	4	NFQCVNASVLNYDCDIQK	20	Sialylated	NFQCVNASVLNYDCDIQK-N4H5F0S1G0	N4H5F0S1G0
FUT8 KO	disintegrin and metalloproteinase domain-containing protein 9	Membrane	WT+FUT8 KO	4	NFQCVNASVLNYDCDIQK	20	Fucosylated	NFQCVNASVLNYDCDIQK-N4H5F1S0G0	N4H5F1S0G0
FUT8 KO	disintegrin and metalloproteinase domain-containing protein 9	Membrane	WT+FUT8 KO	4	NFQCVNASVLNYDCDIQK	20	Fucosylated	NFQCVNASVLNYDCDIQK-N4H5F2S0G0	N4H5F2S0G0
FUT8 KO	disintegrin and metalloproteinase domain-containing protein 9	Membrane	WT+FUT8 KO	4	NFQCVNASVLNYDCDIQK	20	Fucosylated	NFQCVNASVLNYDCDIQK-N4H5F3S0G0	N4H5F3S0G0
FUT8 KO	disintegrin and metalloproteinase domain-containing protein 9	Membrane	WT+FUT8 KO	4	NFQCVNASVLNYDCDIQK	20	Fucosylated	NFQCVNASVLNYDCDIQK-N5H6F3S0G0	N5H6F3S0G0
FUT8 KO	disintegrin and metalloproteinase domain-containing protein 9	Membrane	WT+FUT8 KO	4	NFQCVNASVLNYDCDIQK	20	Complex/Hybrid	NFQCVNASVLNYDCDIQK-N6H5F0S0G0	N6H5F0S0G0
FUT8 KO	disintegrin and metalloproteinase domain-containing protein 9	Membrane	WT+FUT8 KO	4	NFQCVNASVLNYDCDIQK	20	Complex/Hybrid	NFQCVNASVLNYDCDIQK-N6H7F0S0G0	N6H7F0S0G0
FUT8 KO	disintegrin and metalloproteinase domain-containing protein 9	Membrane	WT+FUT8 KO	4	NFQCVNASVLNYDCDIQK	20	Fucosylated	NFQCVNASVLNYDCDIQK-N6H7F2S0G0	N6H7F2S0G0
FUT8 KO	disintegrin and metalloproteinase domain-containing protein 9	Membrane	WT+FUT8 KO	4	NFQCVNASVLNYDCDIQK	20	Fucosylated	NFQCVNASVLNYDCDIQK-N6H7F4S0G0	N6H7F4S0G0
FUT8 KO	disintegrin and metalloproteinase domain-containing protein 9	Membrane	WT+FUT8 KO	4	NFSSCSAEDFEK	14	High-mannosylated	NFSSCSAEDFEK-N2H10F0S0G0	N2H10F0S0G0
FUT8 KO	disintegrin and metalloproteinase domain-containing protein 9	Membrane	WT+FUT8 KO	4	NFSSCSAEDFEK	14	High-mannosylated	NFSSCSAEDFEK-N2H4F0S0G0	N2H4F0S0G0
FUT8 KO	disintegrin and metalloproteinase domain-containing protein 9	Membrane	WT+FUT8 KO	4	NFSSCSAEDFEK	14	High-mannosylated	NFSSCSAEDFEK-N2H5F0S0G0	N2H5F0S0G0
FUT8 KO	disintegrin and metalloproteinase domain-containing protein 9	Membrane	WT+FUT8 KO	4	NFSSCSAEDFEK	14	High-mannosylated	NFSSCSAEDFEK-N2H6F0S0G0	N2H6F0S0G0
FUT8 KO	disintegrin and metalloproteinase domain-containing protein 9	Membrane	WT+FUT8 KO	4	NFSSCSAEDFEK	14	High-mannosylated	NFSSCSAEDFEK-N2H7F0S0G0	N2H7F0S0G0
FUT8 KO	disintegrin and metalloproteinase domain-containing protein 9	Membrane	WT+FUT8 KO	4	NFSSCSAEDFEK	14	High-mannosylated	NFSSCSAEDFEK-N2H8F0S0G0	N2H8F0S0G0
FUT8 KO	disintegrin and metalloproteinase domain-containing protein 9	Membrane	WT+FUT8 KO	4	NFSSCSAEDFEK	14	High-mannosylated	NFSSCSAEDFEK-N2H9F0S0G0	N2H9F0S0G0
FUT8 KO	disintegrin and metalloproteinase domain-containing protein 9	Membrane	WT+FUT8 KO	4	NFSSCSAEDFEK	14	Complex/Hybrid	NFSSCSAEDFEK-N4H5F0S0G0	N4H5F0S0G0
FUT8 KO	disintegrin and metalloproteinase domain-containing protein 9	Membrane	WT+FUT8 KO	4	NFSSCSAEDFEK	14	Sialylated	NFSSCSAEDFEK-N4H5F0S1G0	N4H5F0S1G0
FUT8 KO	disintegrin and metalloproteinase domain-containing protein 9	Membrane	WT+FUT8 KO	4	NFSSCSAEDFEK	14	Sialylated	NFSSCSAEDFEK-N4H5F0S2G0	N4H5F0S2G0
FUT8 KO	disintegrin and metalloproteinase domain-containing protein 9	Membrane	WT+FUT8 KO	4	NFSSCSAEDFEK	14	Fucosylated	NFSSCSAEDFEK-N4H5F2S0G0	N4H5F2S0G0
FUT8 KO	disintegrin and metalloproteinase domain-containing protein 9	Membrane	WT+FUT8 KO	4	NFSSCSAEDFEK	14	Fucosylated	NFSSCSAEDFEK-N4H5F3S0G0	N4H5F3S0G0
FUT8 KO	disintegrin and metalloproteinase domain-containing protein 9	Membrane	WT+FUT8 KO	4	TNECDVPEYCNGSSQFCPPDVFIQNGYPCQNNK	2	Sialylated	TNECDVPEYCNGSSQFCPPDVFIQNGYPCQNNK-N4H5F0S1G0	N4H5F0S1G0
FUT8 KO	disintegrin and metalloproteinase domain-containing protein 9	Membrane	WT+FUT8 KO	4	TNECDVPEYCNGSSQFCPPDVFIQNGYPCQNNK	2	Fucosylated	TNECDVPEYCNGSSQFCPPDVFIQNGYPCQNNK-N4H5F2S0G0	N4H5F2S0G0
FUT8 KO	dolichyl-diphosphooligosaccharide--protein glycosyltransferase subunit 1	Membrane	WT+FUT8 KO	2	DEIGNVSTSHLLILDDSVEMEIRPR	7	High-mannosylated	DEIGNVSTSHLLILDDSVEMEIRPR-N2H4F0S0G0	N2H4F0S0G0
FUT8 KO	dolichyl-diphosphooligosaccharide--protein glycosyltransferase subunit 1	Membrane	WT+FUT8 KO	2	DEIGNVSTSHLLILDDSVEMEIRPR	7	High-mannosylated	DEIGNVSTSHLLILDDSVEMEIRPR-N2H5F0S0G0	N2H5F0S0G0
FUT8 KO	dolichyl-diphosphooligosaccharide--protein glycosyltransferase subunit 1	Membrane	WT+FUT8 KO	2	DEIGNVSTSHLLILDDSVEMEIRPR	7	High-mannosylated	DEIGNVSTSHLLILDDSVEMEIRPR-N2H6F0S0G0	N2H6F0S0G0
FUT8 KO	dolichyl-diphosphooligosaccharide--protein glycosyltransferase subunit 1	Membrane	WT+FUT8 KO	2	DEIGNVSTSHLLILDDSVEMEIRPR	7	High-mannosylated	DEIGNVSTSHLLILDDSVEMEIRPR-N2H7F0S0G0	N2H7F0S0G0
FUT8 KO	dolichyl-diphosphooligosaccharide--protein glycosyltransferase subunit 1	Membrane	WT+FUT8 KO	2	DEIGNVSTSHLLILDDSVEMEIRPR	7	High-mannosylated	DEIGNVSTSHLLILDDSVEMEIRPR-N2H8F0S0G0	N2H8F0S0G0
FUT8 KO	dolichyl-diphosphooligosaccharide--protein glycosyltransferase subunit 1	Membrane	WT+FUT8 KO	2	DEIGNVSTSHLLILDDSVEMEIRPR	7	High-mannosylated	DEIGNVSTSHLLILDDSVEMEIRPR-N2H9F0S0G0	N2H9F0S0G0
FUT8 KO	dolichyl-diphosphooligosaccharide--protein glycosyltransferase subunit 1	Membrane	WT+FUT8 KO	2	DEIGNVSTSHLLILDDSVEMEIRPR	7	Complex/Hybrid	DEIGNVSTSHLLILDDSVEMEIRPR-N6H5F0S0G0	N6H5F0S0G0
FUT8 KO	dolichyl-diphosphooligosaccharide--protein glycosyltransferase subunit 1	Membrane	WT+FUT8 KO	2	TILPAAAQDVYYRDEIGNVSTSHLLILDDSVEMEIRPR	3	High-mannosylated	TILPAAAQDVYYRDEIGNVSTSHLLILDDSVEMEIRPR-N2H6F0S0G0	N2H6F0S0G0
FUT8 KO	dolichyl-diphosphooligosaccharide--protein glycosyltransferase subunit 1	Membrane	WT+FUT8 KO	2	TILPAAAQDVYYRDEIGNVSTSHLLILDDSVEMEIRPR	3	High-mannosylated	TILPAAAQDVYYRDEIGNVSTSHLLILDDSVEMEIRPR-N2H7F0S0G0	N2H7F0S0G0
FUT8 KO	dolichyl-diphosphooligosaccharide--protein glycosyltransferase subunit 1	Membrane	WT+FUT8 KO	2	TILPAAAQDVYYRDEIGNVSTSHLLILDDSVEMEIRPR	3	High-mannosylated	TILPAAAQDVYYRDEIGNVSTSHLLILDDSVEMEIRPR-N2H8F0S0G0	N2H8F0S0G0
FUT8 KO	dolichyl-diphosphooligosaccharide--protein glycosyltransferase subunit 2	Membrane	WT+FUT8 KO	1	SNLDPSNVDSLFYAAQSSQVLSGCEISVSNETK	9	High-mannosylated	SNLDPSNVDSLFYAAQSSQVLSGCEISVSNETK-N2H3F0S0G0	N2H3F0S0G0
FUT8 KO	dolichyl-diphosphooligosaccharide--protein glycosyltransferase subunit 2	Membrane	WT+FUT8 KO	1	SNLDPSNVDSLFYAAQSSQVLSGCEISVSNETK	9	Fucosylated	SNLDPSNVDSLFYAAQSSQVLSGCEISVSNETK-N2H3F1S0G0	N2H3F1S0G0
FUT8 KO	dolichyl-diphosphooligosaccharide--protein glycosyltransferase subunit 2	Membrane	WT+FUT8 KO	1	SNLDPSNVDSLFYAAQSSQVLSGCEISVSNETK	9	High-mannosylated	SNLDPSNVDSLFYAAQSSQVLSGCEISVSNETK-N2H4F0S0G0	N2H4F0S0G0
FUT8 KO	dolichyl-diphosphooligosaccharide--protein glycosyltransferase subunit 2	Membrane	WT+FUT8 KO	1	SNLDPSNVDSLFYAAQSSQVLSGCEISVSNETK	9	High-mannosylated	SNLDPSNVDSLFYAAQSSQVLSGCEISVSNETK-N2H5F0S0G0	N2H5F0S0G0
FUT8 KO	dolichyl-diphosphooligosaccharide--protein glycosyltransferase subunit 2	Membrane	WT+FUT8 KO	1	SNLDPSNVDSLFYAAQSSQVLSGCEISVSNETK	9	High-mannosylated	SNLDPSNVDSLFYAAQSSQVLSGCEISVSNETK-N2H6F0S0G0	N2H6F0S0G0
FUT8 KO	dolichyl-diphosphooligosaccharide--protein glycosyltransferase subunit 2	Membrane	WT+FUT8 KO	1	SNLDPSNVDSLFYAAQSSQVLSGCEISVSNETK	9	High-mannosylated	SNLDPSNVDSLFYAAQSSQVLSGCEISVSNETK-N2H7F0S0G0	N2H7F0S0G0
FUT8 KO	dolichyl-diphosphooligosaccharide--protein glycosyltransferase subunit 2	Membrane	WT+FUT8 KO	1	SNLDPSNVDSLFYAAQSSQVLSGCEISVSNETK	9	High-mannosylated	SNLDPSNVDSLFYAAQSSQVLSGCEISVSNETK-N2H8F0S0G0	N2H8F0S0G0
FUT8 KO	dolichyl-diphosphooligosaccharide--protein glycosyltransferase subunit 2	Membrane	WT+FUT8 KO	1	SNLDPSNVDSLFYAAQSSQVLSGCEISVSNETK	9	Complex/Hybrid	SNLDPSNVDSLFYAAQSSQVLSGCEISVSNETK-N3H3F0S0G0	N3H3F0S0G0
FUT8 KO	dolichyl-diphosphooligosaccharide--protein glycosyltransferase subunit 2	Membrane	WT+FUT8 KO	1	SNLDPSNVDSLFYAAQSSQVLSGCEISVSNETK	9	Fucosylated	SNLDPSNVDSLFYAAQSSQVLSGCEISVSNETK-N4H3F1S0G0	N4H3F1S0G0
FUT8 KO	dolichyl-diphosphooligosaccharide--protein glycosyltransferase subunit STT3A	Membrane	WT+FUT8 KO	2	TILVDNNTWNNTHISR	21	High-mannosylated	TILVDNNTWNNTHISR-N2H10F0S0G0	N2H10F0S0G0
FUT8 KO	dolichyl-diphosphooligosaccharide--protein glycosyltransferase subunit STT3A	Membrane	WT+FUT8 KO	2	TILVDNNTWNNTHISR	21	High-mannosylated	TILVDNNTWNNTHISR-N2H4F0S0G0	N2H4F0S0G0
FUT8 KO	dolichyl-diphosphooligosaccharide--protein glycosyltransferase subunit STT3A	Membrane	WT+FUT8 KO	2	TILVDNNTWNNTHISR	21	High-mannosylated	TILVDNNTWNNTHISR-N2H5F0S0G0	N2H5F0S0G0
FUT8 KO	dolichyl-diphosphooligosaccharide--protein glycosyltransferase subunit STT3A	Membrane	WT+FUT8 KO	2	TILVDNNTWNNTHISR	21	High-mannosylated	TILVDNNTWNNTHISR-N2H6F0S0G0	N2H6F0S0G0
FUT8 KO	dolichyl-diphosphooligosaccharide--protein glycosyltransferase subunit STT3A	Membrane	WT+FUT8 KO	2	TILVDNNTWNNTHISR	21	High-mannosylated	TILVDNNTWNNTHISR-N2H7F0S0G0	N2H7F0S0G0
FUT8 KO	dolichyl-diphosphooligosaccharide--protein glycosyltransferase subunit STT3A	Membrane	WT+FUT8 KO	2	TILVDNNTWNNTHISR	21	High-mannosylated	TILVDNNTWNNTHISR-N2H8F0S0G0	N2H8F0S0G0
FUT8 KO	dolichyl-diphosphooligosaccharide--protein glycosyltransferase subunit STT3A	Membrane	WT+FUT8 KO	2	TILVDNNTWNNTHISR	21	High-mannosylated	TILVDNNTWNNTHISR-N2H9F0S0G0	N2H9F0S0G0
FUT8 KO	dolichyl-diphosphooligosaccharide--protein glycosyltransferase subunit STT3A	Membrane	WT+FUT8 KO	2	TILVDNNTWNNTHISR	21	Sialylated	TILVDNNTWNNTHISR-N4H5F0S1G0	N4H5F0S1G0
FUT8 KO	dolichyl-diphosphooligosaccharide--protein glycosyltransferase subunit STT3A	Membrane	WT+FUT8 KO	2	TILVDNNTWNNTHISR	21	Fucosylated	TILVDNNTWNNTHISR-N4H5F1S0G0	N4H5F1S0G0
FUT8 KO	dolichyl-diphosphooligosaccharide--protein glycosyltransferase subunit STT3A	Membrane	WT+FUT8 KO	2	TILVDNNTWNNTHISR	21	Fucosylated	TILVDNNTWNNTHISR-N4H5F2S0G0	N4H5F2S0G0
FUT8 KO	dolichyl-diphosphooligosaccharide--protein glycosyltransferase subunit STT3A	Membrane	WT+FUT8 KO	2	TILVDNNTWNNTHISR	21	Fucosylated	TILVDNNTWNNTHISR-N4H5F3S0G0	N4H5F3S0G0
FUT8 KO	dolichyl-diphosphooligosaccharide--protein glycosyltransferase subunit STT3A	Membrane	WT+FUT8 KO	2	TILVDNNTWNNTHISR	21	Fucosylated	TILVDNNTWNNTHISR-N5H3F1S0G0	N5H3F1S0G0
FUT8 KO	dolichyl-diphosphooligosaccharide--protein glycosyltransferase subunit STT3A	Membrane	WT+FUT8 KO	2	TILVDNNTWNNTHISR	21	Complex/Hybrid	TILVDNNTWNNTHISR-N5H4F0S0G0	N5H4F0S0G0
FUT8 KO	dolichyl-diphosphooligosaccharide--protein glycosyltransferase subunit STT3A	Membrane	WT+FUT8 KO	2	TILVDNNTWNNTHISR	21	Fucosylated	TILVDNNTWNNTHISR-N5H4F1S0G0	N5H4F1S0G0
FUT8 KO	dolichyl-diphosphooligosaccharide--protein glycosyltransferase subunit STT3A	Membrane	WT+FUT8 KO	2	TILVDNNTWNNTHISR	21	Complex/Hybrid	TILVDNNTWNNTHISR-N5H5F0S0G0	N5H5F0S0G0
FUT8 KO	dolichyl-diphosphooligosaccharide--protein glycosyltransferase subunit STT3A	Membrane	WT+FUT8 KO	2	TILVDNNTWNNTHISR	21	Complex/Hybrid	TILVDNNTWNNTHISR-N5H6F0S0G0	N5H6F0S0G0
FUT8 KO	dolichyl-diphosphooligosaccharide--protein glycosyltransferase subunit STT3A	Membrane	WT+FUT8 KO	2	TILVDNNTWNNTHISR	21	Fucosylated	TILVDNNTWNNTHISR-N5H6F1S0G0	N5H6F1S0G0
FUT8 KO	dolichyl-diphosphooligosaccharide--protein glycosyltransferase subunit STT3A	Membrane	WT+FUT8 KO	2	TILVDNNTWNNTHISR	21	Complex/Hybrid	TILVDNNTWNNTHISR-N6H5F0S0G0	N6H5F0S0G0
FUT8 KO	dolichyl-diphosphooligosaccharide--protein glycosyltransferase subunit STT3A	Membrane	WT+FUT8 KO	2	TILVDNNTWNNTHISR	21	Fucosylated	TILVDNNTWNNTHISR-N6H5F1S0G0	N6H5F1S0G0
FUT8 KO	dolichyl-diphosphooligosaccharide--protein glycosyltransferase subunit STT3A	Membrane	WT+FUT8 KO	2	TILVDNNTWNNTHISR	21	Complex/Hybrid	TILVDNNTWNNTHISR-N6H6F0S0G0	N6H6F0S0G0
FUT8 KO	dolichyl-diphosphooligosaccharide--protein glycosyltransferase subunit STT3A	Membrane	WT+FUT8 KO	2	VMSWWDYGYQITAMANR	5	High-mannosylated	VMSWWDYGYQITAMANR-N2H10F0S0G0	N2H10F0S0G0
FUT8 KO	dolichyl-diphosphooligosaccharide--protein glycosyltransferase subunit STT3A	Membrane	WT+FUT8 KO	2	VMSWWDYGYQITAMANR	5	High-mannosylated	VMSWWDYGYQITAMANR-N2H9F0S0G0	N2H9F0S0G0
FUT8 KO	dolichyl-diphosphooligosaccharide--protein glycosyltransferase subunit STT3A	Membrane	WT+FUT8 KO	2	VMSWWDYGYQITAMANR	5	Fucosylated	VMSWWDYGYQITAMANR-N6H4F1S0G0	N6H4F1S0G0
FUT8 KO	dolichyl-diphosphooligosaccharide--protein glycosyltransferase subunit STT3A	Membrane	WT+FUT8 KO	2	VMSWWDYGYQITAMANR	5	Complex/Hybrid	VMSWWDYGYQITAMANR-N6H5F0S0G0	N6H5F0S0G0
FUT8 KO	dolichyl-diphosphooligosaccharide--protein glycosyltransferase subunit STT3B	Membrane	WT+FUT8 KO	2	TTLVDNNTWNNSHIALVGK	11	High-mannosylated	TTLVDNNTWNNSHIALVGK-N2H10F0S0G0	N2H10F0S0G0
FUT8 KO	dolichyl-diphosphooligosaccharide--protein glycosyltransferase subunit STT3B	Membrane	WT+FUT8 KO	2	TTLVDNNTWNNSHIALVGK	11	High-mannosylated	TTLVDNNTWNNSHIALVGK-N2H4F0S0G0	N2H4F0S0G0
FUT8 KO	dolichyl-diphosphooligosaccharide--protein glycosyltransferase subunit STT3B	Membrane	WT+FUT8 KO	2	TTLVDNNTWNNSHIALVGK	11	High-mannosylated	TTLVDNNTWNNSHIALVGK-N2H5F0S0G0	N2H5F0S0G0
FUT8 KO	dolichyl-diphosphooligosaccharide--protein glycosyltransferase subunit STT3B	Membrane	WT+FUT8 KO	2	TTLVDNNTWNNSHIALVGK	11	High-mannosylated	TTLVDNNTWNNSHIALVGK-N2H6F0S0G0	N2H6F0S0G0
FUT8 KO	dolichyl-diphosphooligosaccharide--protein glycosyltransferase subunit STT3B	Membrane	WT+FUT8 KO	2	TTLVDNNTWNNSHIALVGK	11	High-mannosylated	TTLVDNNTWNNSHIALVGK-N2H7F0S0G0	N2H7F0S0G0
FUT8 KO	dolichyl-diphosphooligosaccharide--protein glycosyltransferase subunit STT3B	Membrane	WT+FUT8 KO	2	TTLVDNNTWNNSHIALVGK	11	High-mannosylated	TTLVDNNTWNNSHIALVGK-N2H8F0S0G0	N2H8F0S0G0
FUT8 KO	dolichyl-diphosphooligosaccharide--protein glycosyltransferase subunit STT3B	Membrane	WT+FUT8 KO	2	TTLVDNNTWNNSHIALVGK	11	High-mannosylated	TTLVDNNTWNNSHIALVGK-N2H9F0S0G0	N2H9F0S0G0
FUT8 KO	dolichyl-diphosphooligosaccharide--protein glycosyltransferase subunit STT3B	Membrane	WT+FUT8 KO	2	TTLVDNNTWNNSHIALVGK	11	Complex/Hybrid	TTLVDNNTWNNSHIALVGK-N5H4F0S0G0	N5H4F0S0G0
FUT8 KO	dolichyl-diphosphooligosaccharide--protein glycosyltransferase subunit STT3B	Membrane	WT+FUT8 KO	2	TTLVDNNTWNNSHIALVGK	11	Fucosylated	TTLVDNNTWNNSHIALVGK-N5H4F1S0G0	N5H4F1S0G0
FUT8 KO	dolichyl-diphosphooligosaccharide--protein glycosyltransferase subunit STT3B	Membrane	WT+FUT8 KO	2	TTLVDNNTWNNSHIALVGK	11	Complex/Hybrid	TTLVDNNTWNNSHIALVGK-N5H5F0S0G0	N5H5F0S0G0
FUT8 KO	dolichyl-diphosphooligosaccharide--protein glycosyltransferase subunit STT3B	Membrane	WT+FUT8 KO	2	TTLVDNNTWNNSHIALVGK	11	Complex/Hybrid	TTLVDNNTWNNSHIALVGK-N6H5F0S0G0	N6H5F0S0G0
FUT8 KO	dolichyl-diphosphooligosaccharide--protein glycosyltransferase subunit STT3B	Membrane	WT+FUT8 KO	2	VMSWWDYGYQIAGMANR	5	High-mannosylated	VMSWWDYGYQIAGMANR-N2H10F0S0G0	N2H10F0S0G0
FUT8 KO	dolichyl-diphosphooligosaccharide--protein glycosyltransferase subunit STT3B	Membrane	WT+FUT8 KO	2	VMSWWDYGYQIAGMANR	5	High-mannosylated	VMSWWDYGYQIAGMANR-N2H5F0S0G0	N2H5F0S0G0
FUT8 KO	dolichyl-diphosphooligosaccharide--protein glycosyltransferase subunit STT3B	Membrane	WT+FUT8 KO	2	VMSWWDYGYQIAGMANR	5	High-mannosylated	VMSWWDYGYQIAGMANR-N2H7F0S0G0	N2H7F0S0G0
FUT8 KO	dolichyl-diphosphooligosaccharide--protein glycosyltransferase subunit STT3B	Membrane	WT+FUT8 KO	2	VMSWWDYGYQIAGMANR	5	High-mannosylated	VMSWWDYGYQIAGMANR-N2H8F0S0G0	N2H8F0S0G0
FUT8 KO	dolichyl-diphosphooligosaccharide--protein glycosyltransferase subunit STT3B	Membrane	WT+FUT8 KO	2	VMSWWDYGYQIAGMANR	5	High-mannosylated	VMSWWDYGYQIAGMANR-N2H9F0S0G0	N2H9F0S0G0
FUT8 KO	dyslexia-associated protein KIAA0319-like protein homolog	Membrane	WT+FUT8 KO	4	ALEINTVTCQLNCSDHGHCDSFTK	5	High-mannosylated	ALEINTVTCQLNCSDHGHCDSFTK-N2H4F0S0G0	N2H4F0S0G0
FUT8 KO	dyslexia-associated protein KIAA0319-like protein homolog	Membrane	WT+FUT8 KO	4	ALEINTVTCQLNCSDHGHCDSFTK	5	High-mannosylated	ALEINTVTCQLNCSDHGHCDSFTK-N2H5F0S0G0	N2H5F0S0G0
FUT8 KO	dyslexia-associated protein KIAA0319-like protein homolog	Membrane	WT+FUT8 KO	4	ALEINTVTCQLNCSDHGHCDSFTK	5	High-mannosylated	ALEINTVTCQLNCSDHGHCDSFTK-N2H6F0S0G0	N2H6F0S0G0
FUT8 KO	dyslexia-associated protein KIAA0319-like protein homolog	Membrane	WT+FUT8 KO	4	ALEINTVTCQLNCSDHGHCDSFTK	5	High-mannosylated	ALEINTVTCQLNCSDHGHCDSFTK-N2H7F0S0G0	N2H7F0S0G0
FUT8 KO	dyslexia-associated protein KIAA0319-like protein homolog	Membrane	WT+FUT8 KO	4	ALEINTVTCQLNCSDHGHCDSFTK	5	High-mannosylated	ALEINTVTCQLNCSDHGHCDSFTK-N2H9F0S0G0	N2H9F0S0G0
FUT8 KO	dyslexia-associated protein KIAA0319-like protein homolog	Membrane	WT+FUT8 KO	4	ALEINTVTCQLNCSDHGHCDSFTKR	2	High-mannosylated	ALEINTVTCQLNCSDHGHCDSFTKR-N2H5F0S0G0	N2H5F0S0G0
FUT8 KO	dyslexia-associated protein KIAA0319-like protein homolog	Membrane	WT+FUT8 KO	4	ALEINTVTCQLNCSDHGHCDSFTKR	2	High-mannosylated	ALEINTVTCQLNCSDHGHCDSFTKR-N2H6F0S0G0	N2H6F0S0G0
FUT8 KO	dyslexia-associated protein KIAA0319-like protein homolog	Membrane	WT+FUT8 KO	4	NVSVHSEPPELTSPTSSTQQVK	3	High-mannosylated	NVSVHSEPPELTSPTSSTQQVK-N2H6F0S0G0	N2H6F0S0G0
FUT8 KO	dyslexia-associated protein KIAA0319-like protein homolog	Membrane	WT+FUT8 KO	4	NVSVHSEPPELTSPTSSTQQVK	3	High-mannosylated	NVSVHSEPPELTSPTSSTQQVK-N2H8F0S0G0	N2H8F0S0G0
FUT8 KO	dyslexia-associated protein KIAA0319-like protein homolog	Membrane	WT+FUT8 KO	4	NVSVHSEPPELTSPTSSTQQVK	3	High-mannosylated	NVSVHSEPPELTSPTSSTQQVK-N2H9F0S0G0	N2H9F0S0G0
FUT8 KO	dyslexia-associated protein KIAA0319-like protein homolog	Membrane	WT+FUT8 KO	4	VIVDGQNAHGEGYVNVTVKPEPR	11	High-mannosylated	VIVDGQNAHGEGYVNVTVKPEPR-N2H6F0S0G0	N2H6F0S0G0
FUT8 KO	dyslexia-associated protein KIAA0319-like protein homolog	Membrane	WT+FUT8 KO	4	VIVDGQNAHGEGYVNVTVKPEPR	11	High-mannosylated	VIVDGQNAHGEGYVNVTVKPEPR-N2H8F0S0G0	N2H8F0S0G0
FUT8 KO	dyslexia-associated protein KIAA0319-like protein homolog	Membrane	WT+FUT8 KO	4	VIVDGQNAHGEGYVNVTVKPEPR	11	Complex/Hybrid	VIVDGQNAHGEGYVNVTVKPEPR-N4H5F0S0G0	N4H5F0S0G0
FUT8 KO	dyslexia-associated protein KIAA0319-like protein homolog	Membrane	WT+FUT8 KO	4	VIVDGQNAHGEGYVNVTVKPEPR	11	Sialylated	VIVDGQNAHGEGYVNVTVKPEPR-N4H5F0S2G0	N4H5F0S2G0
FUT8 KO	dyslexia-associated protein KIAA0319-like protein homolog	Membrane	WT+FUT8 KO	4	VIVDGQNAHGEGYVNVTVKPEPR	11	Fucosylated	VIVDGQNAHGEGYVNVTVKPEPR-N4H5F1S0G0	N4H5F1S0G0
FUT8 KO	dyslexia-associated protein KIAA0319-like protein homolog	Membrane	WT+FUT8 KO	4	VIVDGQNAHGEGYVNVTVKPEPR	11	Fucosylated	VIVDGQNAHGEGYVNVTVKPEPR-N4H5F2S0G0	N4H5F2S0G0
FUT8 KO	dyslexia-associated protein KIAA0319-like protein homolog	Membrane	WT+FUT8 KO	4	VIVDGQNAHGEGYVNVTVKPEPR	11	Fucosylated	VIVDGQNAHGEGYVNVTVKPEPR-N4H5F3S0G0	N4H5F3S0G0
FUT8 KO	dyslexia-associated protein KIAA0319-like protein homolog	Membrane	WT+FUT8 KO	4	VIVDGQNAHGEGYVNVTVKPEPR	11	Complex/Hybrid	VIVDGQNAHGEGYVNVTVKPEPR-N6H7F0S0G0	N6H7F0S0G0
FUT8 KO	dystroglycan	Membrane	WT+FUT8 KO	1	GSIVVEWTNNTLPLEPCPK	9	High-mannosylated	GSIVVEWTNNTLPLEPCPK-N2H6F0S0G0	N2H6F0S0G0
FUT8 KO	dystroglycan	Membrane	WT+FUT8 KO	1	GSIVVEWTNNTLPLEPCPK	9	High-mannosylated	GSIVVEWTNNTLPLEPCPK-N2H7F0S0G0	N2H7F0S0G0
FUT8 KO	dystroglycan	Membrane	WT+FUT8 KO	1	GSIVVEWTNNTLPLEPCPK	9	High-mannosylated	GSIVVEWTNNTLPLEPCPK-N2H8F0S0G0	N2H8F0S0G0
[truncated: 12,525 more rows]
